# Supplementary material for: Chemical proteomic profiling of proteinN-homocysteinylation with a thioester probe
Source: Royal Society of Chemistry journal article supplement (doi:10.1039/c8sc00221e), 2018-01-01
Supplement: c8sc00221e2.xlsx [file c8sc00221e2.xlsx]

## Sheet: Sheet1
Quantified N-homocysteinylated proteins in HeLa cell lysate treated with HTL in vitro
ipi	description	symbol	Ratio of R1	Ratio of R2	Ratio of R3	sd of R1	sd of R2	sd of R3	Ratio of R1>=2	Ratio of R2>=2	Ratio of R3>=2	times of quantification
Q9BPW8	NIPSNAP1 Protein NipSnap homolog 1	NIPSNAP1	15	15	15	4.56	4.42	2.78	TRUE	TRUE	TRUE	3
Q14677	CLINT1 Clathrin interactor 1	CLINT1	15	11.23	15	7.16	6.1	0	TRUE	TRUE	TRUE	3
O76070	SNCG Gamma-synuclein	SNCG	15	6.75	15	0	5.11	3.58	TRUE	TRUE	TRUE	3
O95801	TTC4 Tetratricopeptide repeat protein 4	TTC4	3.19	4.11	15	0	1.79	0	TRUE	TRUE	TRUE	3
Q0VDF9	HSPA14 Heat shock 70 kDa protein 14	HSPA14	3.79	2.51	15	0	1.19	0	TRUE	TRUE	TRUE	3
Q05086	UBE3A Ubiquitin-protein ligase E3A	UBE3A	5.66	2.22	15	5.99	0	0	TRUE	TRUE	TRUE	3
O75323	GBAS Protein NipSnap homolog 2	GBAS	9.15	12.64	14.29	1.06	0	2.73	TRUE	TRUE	TRUE	3
P13693	TPT1 Translationally-controlled tumor protein	TPT1	5.37	5.58	14.16	1.81	4.65	4.43	TRUE	TRUE	TRUE	3
Q8IWJ2	GCC2 GRIP and coiled-coil domain-containing protein 2	GCC2	3.39	4.41	11.04	6.88	0	5.6	TRUE	TRUE	TRUE	3
Q7Z417	NUFIP2 Nuclear fragile X mental retardation-interacting p	NUFIP2	3.8	3.34	10.75	1.58	1.48	5.25	TRUE	TRUE	TRUE	3
P30519	HMOX2 Heme oxygenase 2	HMOX2	4.93	2.82	10.2	0.67	0	6.79	TRUE	TRUE	TRUE	3
Q9HB71	CACYBP Calcyclin-binding protein	CACYBP	10.43	12.95	10.1	4.17	4.09	4.21	TRUE	TRUE	TRUE	3
Q4V328	GRIPAP1 GRIP1-associated protein 1	GRIPAP1	13.92	3.54	10	1.53	1.52	7.08	TRUE	TRUE	TRUE	3
O15347	HMGB3 High mobility group protein B3	HMGB3	5.9	5.32	9.92	6.11	1.39	6.31	TRUE	TRUE	TRUE	3
P63279	UBE2I SUMO-conjugating enzyme UBC9	UBE2I	7.99	3.8	9.88	6.5	1.61	7.25	TRUE	TRUE	TRUE	3
O43837	IDH3B Isocitrate dehydrogenase	IDH3B	2.87	4.73	9.82	5.56	0	7.32	TRUE	TRUE	TRUE	3
P61604	HSPE1 10 kDa heat shock protein, mitochondrial	HSPE1	13.55	15	9.81	2.04	1.99	2.97	TRUE	TRUE	TRUE	3
P23588	EIF4B Eukaryotic translation initiation factor 4B	EIF4B	6.34	6.39	9.81	4.08	4.71	4.22	TRUE	TRUE	TRUE	3
P51911	CNN1 Calponin-1	CNN1	6.29	6.06	9.44	4.02	3.09	7.86	TRUE	TRUE	TRUE	3
Q9BY77	POLDIP3 Polymerase delta-interacting protein 3	POLDIP3	11.3	4.61	9.34	5.23	2.26	8.01	TRUE	TRUE	TRUE	3
Q9H6T3	RPAP3 RNA polymerase II-associated protein 3	RPAP3	4.82	3.95	9.34	3.69	7.33	8	TRUE	TRUE	TRUE	3
O14602	EIF1AY Eukaryotic translation initiation factor 1A, Y-chr	EIF1AY	3.89	3.27	9.18	0.91	1.31	8.24	TRUE	TRUE	TRUE	3
Q96Q11	TRNT1 CCA tRNA nucleotidyltransferase 1, mitochondrial	TRNT1	3.15	3.04	8.65	0.81	0.32	8.97	TRUE	TRUE	TRUE	3
Q9Y281	CFL2 Cofilin-2	CFL2	7	6.15	8.58	4.39	4.33	3.76	TRUE	TRUE	TRUE	3
P20340	RAB6A Ras-related protein Rab-6A	RAB6A	3.48	4.56	8.55	0.06	0.45	8.78	TRUE	TRUE	TRUE	3
P53999	SUB1 Activated RNA polymerase II transcriptional coacti	SUB1	6.86	15	8.41	4.59	4.39	1.74	TRUE	TRUE	TRUE	3
Q8IYB8	SUPV3L1 ATP-dependent RNA helicase SUPV3L1, mitochondrial	SUPV3L1	2.09	15	8.29	6.65	0	9.49	TRUE	TRUE	TRUE	3
Q9NR50	EIF2B3 Translation initiation factor eIF-2B subunit gamma	EIF2B3	2.56	2.37	8.29	0.4	0	9.49	TRUE	TRUE	TRUE	3
P23528	CFL1 Cofilin-1	CFL1	7.57	7.8	7.9	4.22	3.12	3.86	TRUE	TRUE	TRUE	3
Q96P16	RPRD1A Regulation of nuclear pre-mRNA domain-containing p	RPRD1A	3.47	3.06	7.21	0	4.05	3.49	TRUE	TRUE	TRUE	3
P50502	ST13 Hsc70-interacting protein	ST13	6.38	6.88	7.17	1.95	3.3	1.34	TRUE	TRUE	TRUE	3
P55145	MANF Mesencephalic astrocyte-derived neurotrophic facto	MANF	7.2	8.67	7.04	2.16	0	2.02	TRUE	TRUE	TRUE	3
Q96I25	RBM17 Splicing factor 45	RBM17	2.87	3.28	6.98	0.95	0.7	5.66	TRUE	TRUE	TRUE	3
Q96E11	MRRF Ribosome-recycling factor, mitochondrial	MRRF	4.25	5.86	6.7	2.15	6.42	0	TRUE	TRUE	TRUE	3
P23193	TCEA1 Transcription elongation factor A protein 1	TCEA1	7.45	5.84	6.69	3.97	1.39	3.48	TRUE	TRUE	TRUE	3
Q9NTX5	ECHDC1 Ethylmalonyl-CoA decarboxylase	ECHDC1	3.92	2.62	6.61	0.34	0	5.49	TRUE	TRUE	TRUE	3
P06753	TPM3 Tropomyosin alpha-3 chain	TPM3	6.7	5.93	6.39	3.96	2.65	1.46	TRUE	TRUE	TRUE	3
Q9HD26	GOPC Golgi-associated PDZ and coiled-coil motif-contain	GOPC	15	3.11	6.37	0	0	0	TRUE	TRUE	TRUE	3
Q13765	NACA Nascent polypeptide-associated complex subunit alp	NACA	7.9	7.88	6.21	2.97	4.46	1.37	TRUE	TRUE	TRUE	3
Q00688	FKBP3 Peptidyl-prolyl cis-trans isomerase FKBP3	FKBP3	6.23	5.24	6.04	4.97	1.78	1.28	TRUE	TRUE	TRUE	3
Q99623	PHB2 Prohibitin-2	PHB2	7.22	6.32	5.99	3.56	3.56	2.86	TRUE	TRUE	TRUE	3
Q9P2B4	CTTNBP2NL CTTNBP2 N-terminal-like protein	CTTNBP2NL	15	2.13	5.88	0	0	0	TRUE	TRUE	TRUE	3
O60869	EDF1 Endothelial differentiation-related factor 1	EDF1	13.85	6.15	5.76	1.63	1.63	0.19	TRUE	TRUE	TRUE	3
Q9BZD4	NUF2 Kinetochore protein Nuf2	NUF2	9.07	2.35	5.75	7.94	0.76	2.82	TRUE	TRUE	TRUE	3
Q99961	SH3GL1 Endophilin-A2	SH3GL1	5.21	2.97	5.74	1.05	1.1	3.48	TRUE	TRUE	TRUE	3
Q96EA4	CCDC99 Protein Spindly	CCDC99	3.22	5.31	5.64	2.91	1.09	0.52	TRUE	TRUE	TRUE	3
Q9NPF5	DMAP1 DNA methyltransferase 1-associated protein 1	DMAP1	4.66	4.34	5.6	0	0	5.7	TRUE	TRUE	TRUE	3
Q8NI08	NCOA7 Nuclear receptor coactivator 7	NCOA7	15	15	5.56	0	0	4.09	TRUE	TRUE	TRUE	3
P60903	S100A10 Protein S100-A10	S100A10	4.62	3.94	5.56	0	1.2	0	TRUE	TRUE	TRUE	3
Q9UNF0	PACSIN2 Protein kinase C and casein kinase substrate in ne	PACSIN2	4.54	4.09	5.53	3.18	1.07	2.11	TRUE	TRUE	TRUE	3
Q9H0C8	ILKAP Integrin-linked kinase-associated serine/threonine	ILKAP	3.42	5.08	5.51	1.7	0.31	3.91	TRUE	TRUE	TRUE	3
Q9Y3A5	SBDS Ribosome maturation protein SBDS	SBDS	5.31	4.69	5.47	4.14	3.74	3.04	TRUE	TRUE	TRUE	3
P60981	DSTN Destrin	DSTN	4.31	4.44	5.46	1.74	3.37	3.09	TRUE	TRUE	TRUE	3
Q96DG6	CMBL Carboxymethylenebutenolidase homolog	CMBL	2.82	2.4	5.39	4.53	6.35	6.7	TRUE	TRUE	TRUE	3
O75937	DNAJC8 DnaJ homolog subfamily C member 8	DNAJC8	5.92	5.52	5.37	4.68	2.05	2.11	TRUE	TRUE	TRUE	3
P35269	GTF2F1 General transcription factor IIF subunit 1	GTF2F1	10.35	9.56	5.36	4.1	3.28	0.88	TRUE	TRUE	TRUE	3
P09429	HMGB1 High mobility group protein B1	HMGB1	4.38	5.17	5.18	3.93	3.45	3.52	TRUE	TRUE	TRUE	3
O94903	PROSC Proline synthase co-transcribed bacterial homolog	PROSC	3.93	4.52	5.08	0	0	0	TRUE	TRUE	TRUE	3
Q9Y2Z0	SUGT1 Suppressor of G2 allele of SKP1 homolog	SUGT1	6.91	6.21	5.02	4.45	5.04	1.69	TRUE	TRUE	TRUE	3
Q9UJZ1	STOML2 Stomatin-like protein 2	STOML2	5.02	5.18	4.98	0	0	0.52	TRUE	TRUE	TRUE	3
Q8WW12	PCNP PEST proteolytic signal-containing nuclear protein	PCNP	4.83	5.58	4.95	0	5.64	2.38	TRUE	TRUE	TRUE	3
P61088	UBE2N Ubiquitin-conjugating enzyme E2 N	UBE2N	5.36	8.97	4.85	5.83	8.52	5.71	TRUE	TRUE	TRUE	3
Q9BUL8	PDCD10 Programmed cell death protein 10	PDCD10	12.61	7.58	4.84	3.39	10.5	6.15	TRUE	TRUE	TRUE	3
P07951	TPM2 Tropomyosin beta chain	TPM2	6.7	5.93	4.76	3.43	4.74	1.85	TRUE	TRUE	TRUE	3
P09493	TPM1 Tropomyosin alpha-1 chain	TPM1	7.72	3.53	4.76	4.78	1.8	4.37	TRUE	TRUE	TRUE	3
Q9Y2W2	WBP11 WW domain-binding protein 11	WBP11	4.86	4.53	4.72	2.88	0	0.41	TRUE	TRUE	TRUE	3
P20700	LMNB1 Lamin-B1	LMNB1	4.62	3.59	4.72	3.65	4.61	3.34	TRUE	TRUE	TRUE	3
Q16836	HADH Hydroxyacyl-coenzyme A dehydrogenase, mitochondria	HADH	4.18	3.88	4.7	1.79	2.51	0.74	TRUE	TRUE	TRUE	3
P43897	TSFM Elongation factor Ts, mitochondrial	TSFM	5.59	5	4.64	3.47	2.65	2.05	TRUE	TRUE	TRUE	3
Q08752	PPID Peptidyl-prolyl cis-trans isomerase D	PPID	5.17	4.92	4.64	3.68	1.9	1.03	TRUE	TRUE	TRUE	3
P30740	SERPINB1 Leukocyte elastase inhibitor	SERPINB1	4.93	3.28	4.63	5.8	0	0	TRUE	TRUE	TRUE	3
P26583	HMGB2 High mobility group protein B2	HMGB2	5.96	4.35	4.62	4.63	3.21	2.32	TRUE	TRUE	TRUE	3
Q5VTR2	RNF20 E3 ubiquitin-protein ligase BRE1A	RNF20	3.7	2.88	4.62	1.51	1.78	4.82	TRUE	TRUE	TRUE	3
Q15785	TOMM34 Mitochondrial import receptor subunit TOM34	TOMM34	5.77	4.39	4.6	3.88	3.45	3.24	TRUE	TRUE	TRUE	3
P09012	SNRPA U1 small nuclear ribonucleoprotein A	SNRPA	4.54	4.85	4.58	2.21	6.88	0.58	TRUE	TRUE	TRUE	3
O00170	AIP AH receptor-interacting protein	AIP	6.12	3.62	4.56	2.82	0.57	1.33	TRUE	TRUE	TRUE	3
Q15075	EEA1 Early endosome antigen 1	EEA1	5.06	11.3	4.54	4.16	5.23	5.83	TRUE	TRUE	TRUE	3
Q01469	FABP5 Fatty acid-binding protein, epidermal	FABP5	9.5	5.2	4.54	4.96	0	2.1	TRUE	TRUE	TRUE	3
Q16204	CCDC6 Coiled-coil domain-containing protein 6	CCDC6	5.38	3.62	4.49	0.62	4.13	1.13	TRUE	TRUE	TRUE	3
P98082	DAB2 Disabled homolog 2	DAB2	15	5.23	4.47	6.14	6.08	3.11	TRUE	TRUE	TRUE	3
O75150	RNF40 E3 ubiquitin-protein ligase BRE1B	RNF40	4.25	4.57	4.46	1.28	3.07	5.05	TRUE	TRUE	TRUE	3
P30040	ERP29 Endoplasmic reticulum resident protein 29	ERP29	3.94	3.01	4.46	1.52	0.52	1.12	TRUE	TRUE	TRUE	3
Q8WVY7	UBLCP1 Ubiquitin-like domain-containing CTD phosphatase 1	UBLCP1	4.95	4.15	4.43	2.91	0	0	TRUE	TRUE	TRUE	3
O95292	VAPB Vesicle-associated membrane protein-associated pro	VAPB	3.46	3.02	4.42	0.54	0.58	0	TRUE	TRUE	TRUE	3
P02545	LMNA Prelamin-A/C	LMNA	4.9	4.21	4.41	2.26	1.09	1.67	TRUE	TRUE	TRUE	3
Q13185	CBX3 Chromobox protein homolog 3	CBX3	4.11	2.49	4.41	4.9	0.66	1.04	TRUE	TRUE	TRUE	3
Q03252	LMNB2 Lamin-B2	LMNB2	6.4	4.63	4.38	2.23	0.86	0.59	TRUE	TRUE	TRUE	3
P31948	STIP1 Stress-induced-phosphoprotein 1	STIP1	5.29	4.05	4.38	3.61	2.64	3.25	TRUE	TRUE	TRUE	3
Q9H0B6	KLC2 Kinesin light chain 2	KLC2	13.26	3.66	4.38	5	3.3	5.09	TRUE	TRUE	TRUE	3
P08579	SNRPB2 U2 small nuclear ribonucleoprotein B	SNRPB2	4.44	4.85	4.37	0.14	6.88	0.85	TRUE	TRUE	TRUE	3
P42167	TMPO Lamina-associated polypeptide 2, isoforms beta/gam	TMPO	3.8	2.5	4.36	4.5	0.95	2.38	TRUE	TRUE	TRUE	3
Q15181	PPA1 Inorganic pyrophosphatase	PPA1	4.14	3.47	4.35	3.89	4.29	1.08	TRUE	TRUE	TRUE	3
Q9Y314	NOSIP Nitric oxide synthase-interacting protein	NOSIP	3.24	3.84	4.32	5.15	0	1.3	TRUE	TRUE	TRUE	3
P36543	ATP6V1E1 V-type proton ATPase subunit E 1	ATP6V1E1	5.09	4.44	4.29	3.66	6.2	0.73	TRUE	TRUE	TRUE	3
P99999	CYCS Cytochrome c	CYCS	3.96	3.18	4.25	0.95	0.24	0.75	TRUE	TRUE	TRUE	3
Q99471	PFDN5 Prefoldin subunit 5	PFDN5	3.74	2.28	4.25	4.17	0.07	4.52	TRUE	TRUE	TRUE	3
Q8WXI9	GATAD2B Transcriptional repressor p66-beta	GATAD2B	3.83	2.04	4.22	0.74	0.28	0.44	TRUE	TRUE	TRUE	3
Q14155	ARHGEF7 Rho guanine nucleotide exchange factor 7	ARHGEF7	5.76	3.82	4.19	5.93	0	0.09	TRUE	TRUE	TRUE	3
Q6NZI2	PTRF Polymerase I and transcript release factor	PTRF	4.63	4.67	4.15	3.81	4.69	1.12	TRUE	TRUE	TRUE	3
Q15637	SF1 Splicing factor 1	SF1	3.43	4.07	4.14	0.2	0.65	3.13	TRUE	TRUE	TRUE	3
Q99615	DNAJC7 DnaJ homolog subfamily C member 7	DNAJC7	4.77	3.62	4.14	3.55	3.18	4.9	TRUE	TRUE	TRUE	3
P61758	VBP1 Prefoldin subunit 3	VBP1	6.61	4.12	4.13	1.93	0.39	1.07	TRUE	TRUE	TRUE	3
Q9GZV4	EIF5A2 Eukaryotic translation initiation factor 5A-2	EIF5A2	4.22	3.77	4.13	0.99	1.65	1.91	TRUE	TRUE	TRUE	3
P23919	DTYMK Thymidylate kinase	DTYMK	4.25	2.86	4.1	0.75	0.54	1.06	TRUE	TRUE	TRUE	3
Q9Y608	LRRFIP2 Leucine-rich repeat flightless-interacting protein	LRRFIP2	9.41	2.37	4.1	7.91	0	6.79	TRUE	TRUE	TRUE	3
P28838	LAP3 Cytosol aminopeptidase	LAP3	4.23	4.34	4.06	3.21	4.49	4.73	TRUE	TRUE	TRUE	3
P48507	GCLM Glutamate--cysteine ligase regulatory subunit	GCLM	3.66	4.2	4.06	3.09	0.75	1.06	TRUE	TRUE	TRUE	3
Q9Y266	NUDC Nuclear migration protein nudC	NUDC	4.89	3.48	4.05	2.97	3.28	1.46	TRUE	TRUE	TRUE	3
Q9NX58	LYAR Cell growth-regulating nucleolar protein	LYAR	2.72	2.26	4.05	0.31	0.55	0.33	TRUE	TRUE	TRUE	3
Q15424	SAFB Scaffold attachment factor B1	SAFB	3.57	2.74	4.04	4.54	6.3	0.23	TRUE	TRUE	TRUE	3
P50583	NUDT2 Bis(5-nucleosyl)-tetraphosphatase	NUDT2	2.95	15	4.03	1.27	0	0.8	TRUE	TRUE	TRUE	3
Q6IS14	EIF5AL1 Eukaryotic translation initiation factor 5A-1-like	EIF5AL1	4.5	3.97	4.03	1.24	1.46	1.68	TRUE	TRUE	TRUE	3
E7EVH7	KLC1 Kinesin light chain 1	KLC1	5.31	3.32	4.02	2.98	1.24	1.92	TRUE	TRUE	TRUE	3
Q07866	KLC1 Kinesin light chain 1	KLC1	5.31	3.32	4.02	2.98	1.24	1.92	TRUE	TRUE	TRUE	3
Q9NQR4	NIT2 Omega-amidase NIT2	NIT2	3.2	15	4.01	0	0	1.3	TRUE	TRUE	TRUE	3
Q05639	EEF1A2 Elongation factor 1-alpha 2	EEF1A2	3.63	3.95	4.01	3.98	0.79	1.81	TRUE	TRUE	TRUE	3
Q9GZZ1	NAA50 N-alpha-acetyltransferase 50	NAA50	3.23	3.52	4	1.48	0	1.04	TRUE	TRUE	TRUE	3
P09488	GSTM1 Glutathione S-transferase Mu 1	GSTM1	4.34	2.66	3.99	1.72	0.56	0	TRUE	TRUE	TRUE	3
P40222	TXLNA Alpha-taxilin	TXLNA	4.81	3.55	3.98	2.8	3.3	0.7	TRUE	TRUE	TRUE	3
Q9P2E9	RRBP1 Ribosome-binding protein 1	RRBP1	4.88	3.96	3.95	3.73	3.93	3.78	TRUE	TRUE	TRUE	3
Q96I99	SUCLG2 Succinyl-CoA ligase	SUCLG2	4.21	4.8	3.94	1.26	4.39	1.46	TRUE	TRUE	TRUE	3
Q13573	SNW1 SNW domain-containing protein 1	SNW1	3.88	3.04	3.92	1.36	0.61	3.73	TRUE	TRUE	TRUE	3
Q8IUD2	ERC1 ELKS/Rab6-interacting/CAST family member 1	ERC1	4.15	2.75	3.92	4.38	5.53	1.57	TRUE	TRUE	TRUE	3
Q13561	DCTN2 Dynactin subunit 2	DCTN2	4.72	3.43	3.89	4.73	1.81	3.5	TRUE	TRUE	TRUE	3
Q14247	CTTN Src substrate cortactin	CTTN	3.88	3.66	3.88	0.63	3.45	0.63	TRUE	TRUE	TRUE	3
Q96BN8	FAM105B Protein FAM105B	FAM105B	5.13	2.71	3.88	4.41	2.2	0.78	TRUE	TRUE	TRUE	3
Q86YP4	GATAD2A Transcriptional repressor p66-alpha	GATAD2A	6.67	3.19	3.87	5.98	7.11	0	TRUE	TRUE	TRUE	3
P09661	SNRPA1 U2 small nuclear ribonucleoprotein A	SNRPA1	4.8	4.82	3.84	0.92	4.52	0.79	TRUE	TRUE	TRUE	3
P62318	SNRPD3 Small nuclear ribonucleoprotein Sm D3	SNRPD3	8.11	3.85	3.83	4.24	0.4	5.84	TRUE	TRUE	TRUE	3
P68104	EEF1A1 Elongation factor 1-alpha 1	EEF1A1	3.52	3.68	3.82	2.17	2.39	2.49	TRUE	TRUE	TRUE	3
P20042	EIF2S2 Eukaryotic translation initiation factor 2 subunit	EIF2S2	3.91	3.48	3.82	0.53	0.82	4.15	TRUE	TRUE	TRUE	3
Q9NXV6	CDKN2AIP CDKN2A-interacting protein	CDKN2AIP	4.22	3.55	3.81	4.09	4.51	5.35	TRUE	TRUE	TRUE	3
O43583	DENR Density-regulated protein	DENR	3.14	3.34	3.78	0.61	0	0	TRUE	TRUE	TRUE	3
Q9H2U2	PPA2 Inorganic pyrophosphatase 2, mitochondrial	PPA2	4.44	4.06	3.77	1.21	2.12	1.22	TRUE	TRUE	TRUE	3
Q9NP61	ARFGAP3 ADP-ribosylation factor GTPase-activating protein	ARFGAP3	15	3.76	3.77	0	0	0.29	TRUE	TRUE	TRUE	3
Q9UNE7	STUB1 E3 ubiquitin-protein ligase CHIP	STUB1	4.53	3.07	3.77	0	0.38	1.54	TRUE	TRUE	TRUE	3
Q9Y6K9	IKBKG NF-kappa-B essential modulator	IKBKG	5.66	15	3.76	1.44	0	1.6	TRUE	TRUE	TRUE	3
Q9UIJ7	AK3 GTP:AMP phosphotransferase, mitochondrial	AK3	4.64	4.25	3.76	5.45	6.04	1.77	TRUE	TRUE	TRUE	3
Q99962	SH3GL2 Endophilin-A1	SH3GL2	4.5	3.82	3.76	0	0	0	TRUE	TRUE	TRUE	3
Q9BQ69	MACROD1 O-acetyl-ADP-ribose deacetylase MACROD1	MACROD1	4.55	3.61	3.76	0.68	0.16	0.92	TRUE	TRUE	TRUE	3
Q86VS8	HOOK3 Protein Hook homolog 3	HOOK3	5.82	7.92	3.75	5.71	0	0.06	TRUE	TRUE	TRUE	3
Q9NUQ8	ABCF3 ATP-binding cassette sub-family F member 3	ABCF3	3.16	6.78	3.75	0	4.45	0	TRUE	TRUE	TRUE	3
O76031	CLPX ATP-dependent Clp protease ATP-binding subunit clp	CLPX	3.82	4.66	3.74	1.46	4.27	4.39	TRUE	TRUE	TRUE	3
Q06830	PRDX1 Peroxiredoxin-1	PRDX1	3.88	4	3.73	3.68	4.19	3.54	TRUE	TRUE	TRUE	3
P07355	ANXA2 Annexin A2	ANXA2	4.48	3.87	3.73	1.86	1.35	2.03	TRUE	TRUE	TRUE	3
Q14157	UBAP2L Ubiquitin-associated protein 2-like	UBAP2L	6.46	3	3.73	3.7	0.47	1.01	TRUE	TRUE	TRUE	3
Q9P2R7	SUCLA2 Succinyl-CoA ligase	SUCLA2	4.72	2.32	3.73	4.47	0.34	5	TRUE	TRUE	TRUE	3
Q9Y5K6	CD2AP CD2-associated protein	CD2AP	4.75	8.61	3.69	1.45	9.04	4.03	TRUE	TRUE	TRUE	3
P38117	ETFB Electron transfer flavoprotein subunit beta	ETFB	7.37	4.84	3.69	3.36	2.46	0	TRUE	TRUE	TRUE	3
Q15796	SMAD2 Mothers against decapentaplegic homolog 2	SMAD2	3	3.09	3.69	1.12	0.06	0	TRUE	TRUE	TRUE	3
O76003	GLRX3 Glutaredoxin-3	GLRX3	4.52	2.89	3.69	1.23	0.91	0.69	TRUE	TRUE	TRUE	3
Q9Y2Q3	GSTK1 Glutathione S-transferase kappa 1	GSTK1	3.64	3.48	3.68	1.44	0.34	0.75	TRUE	TRUE	TRUE	3
Q9UKX7	NUP50 Nuclear pore complex protein Nup50	NUP50	4.29	5.07	3.67	0.4	0	2.96	TRUE	TRUE	TRUE	3
Q9UPT5	EXOC7 Exocyst complex component 7	EXOC7	4.16	3.67	3.65	1.98	0.02	0.8	TRUE	TRUE	TRUE	3
A1X283	SH3PXD2B SH3 and PX domain-containing protein 2B	SH3PXD2B	3.49	2.92	3.65	1.92	0.61	0.92	TRUE	TRUE	TRUE	3
Q14789	GOLGB1 Golgin subfamily B member 1	GOLGB1	3.23	4.04	3.64	5.5	4.54	6.04	TRUE	TRUE	TRUE	3
P06576	ATP5B ATP synthase subunit beta, mitochondrial	ATP5B	3.73	3.5	3.64	3.85	2.19	2.82	TRUE	TRUE	TRUE	3
P43034	PAFAH1B1 Platelet-activating factor acetylhydrolase IB subu	PAFAH1B1	3.5	3.31	3.64	1.18	3.66	3.96	TRUE	TRUE	TRUE	3
Q8IVF2	AHNAK2 Protein AHNAK2	AHNAK2	4.28	3.67	3.62	4.12	2.01	2.7	TRUE	TRUE	TRUE	3
P23381	WARS Tryptophan--tRNA ligase, cytoplasmic	WARS	3.26	3	3.62	0.82	0.49	0.48	TRUE	TRUE	TRUE	3
Q00577	PURA Transcriptional activator protein Pur-alpha	PURA	3.48	3.82	3.61	0.01	2.31	0	TRUE	TRUE	TRUE	3
Q9P0K7	RAI14 Ankycorbin	RAI14	4.63	3.62	3.61	3.99	4.9	4.52	TRUE	TRUE	TRUE	3
Q9H0W9	C11orf54 Ester hydrolase C11orf54	C11orf54	4.16	2.35	3.61	0	0	0	TRUE	TRUE	TRUE	3
P63173	RPL38 60S ribosomal protein L38	RPL38	6.96	3.64	3.6	2.94	1.44	0.9	TRUE	TRUE	TRUE	3
P39748	FEN1 Flap endonuclease 1	FEN1	4.06	3.41	3.6	1.02	4.03	3.4	TRUE	TRUE	TRUE	3
P11310	ACADM Medium-chain specific acyl-CoA dehydrogenase, mito	ACADM	3.49	3.21	3.6	6.05	0.58	3.37	TRUE	TRUE	TRUE	3
Q9NSD9	FARSB Phenylalanine--tRNA ligase beta subunit	FARSB	4.12	3.42	3.58	2.46	0.72	1.08	TRUE	TRUE	TRUE	3
Q05682	CALD1 Caldesmon	CALD1	3.56	3.21	3.57	3.43	0.8	5.58	TRUE	TRUE	TRUE	3
Q15054	POLD3 DNA polymerase delta subunit 3	POLD3	4.8	3.79	3.55	4.32	1.52	1.71	TRUE	TRUE	TRUE	3
Q9BT78	COPS4 COP9 signalosome complex subunit 4	COPS4	3.9	3.37	3.54	0.85	0.57	0.38	TRUE	TRUE	TRUE	3
P21796	VDAC1 Voltage-dependent anion-selective channel protein	VDAC1	4.56	3.87	3.5	4.27	0.99	0.96	TRUE	TRUE	TRUE	3
Q92890	UFD1L Ubiquitin fusion degradation protein 1 homolog	UFD1L	8.68	3.46	3.5	4.5	0	0	TRUE	TRUE	TRUE	3
P10809	HSPD1 60 kDa heat shock protein, mitochondrial	HSPD1	4.16	3.35	3.5	2.85	1.21	2.61	TRUE	TRUE	TRUE	3
Q6FI81	CIAPIN1 Anamorsin	CIAPIN1	3.88	3.29	3.5	0.38	3.97	1.5	TRUE	TRUE	TRUE	3
Q13123	IK Protein Red	IK	3.56	3.24	3.5	2.62	6.01	6.02	TRUE	TRUE	TRUE	3
Q08378	GOLGA3 Golgin subfamily A member 3	GOLGA3	15	2.09	3.5	0	1.56	7.09	TRUE	TRUE	TRUE	3
Q16763	UBE2S Ubiquitin-conjugating enzyme E2 S	UBE2S	8.64	4.4	3.49	5.76	0	0.81	TRUE	TRUE	TRUE	3
Q86V81	ALYREF THO complex subunit 4	ALYREF	3	4.24	3.49	1.52	5.78	0.64	TRUE	TRUE	TRUE	3
P30101	PDIA3 Protein disulfide-isomerase A3	PDIA3	4.29	3.21	3.49	3.01	0.57	2.12	TRUE	TRUE	TRUE	3
P55010	EIF5 Eukaryotic translation initiation factor 5	EIF5	4.38	3.15	3.49	1.31	1.5	0.7	TRUE	TRUE	TRUE	3
P06748	NPM1 Nucleophosmin	NPM1	3.58	3.1	3.49	2.72	2.69	4.39	TRUE	TRUE	TRUE	3
Q13217	DNAJC3 DnaJ homolog subfamily C member 3	DNAJC3	13.79	3.13	3.48	1.39	0.61	0.52	TRUE	TRUE	TRUE	3
O00151	PDLIM1 PDZ and LIM domain protein 1	PDLIM1	7.22	2.75	3.48	4	3.24	2.68	TRUE	TRUE	TRUE	3
Q01105	SET Protein SET	SET	3.39	3.6	3.47	2.14	1.56	0.42	TRUE	TRUE	TRUE	3
Q9BWU0	SLC4A1AP Kanadaptin	SLC4A1AP	3.42	3.16	3.46	0.45	2.9	0	TRUE	TRUE	TRUE	3
Q6PI48	DARS2 Aspartate--tRNA ligase, mitochondrial	DARS2	2.94	2.25	3.46	6.17	0.46	6.89	TRUE	TRUE	TRUE	3
P29558	RBMS1 RNA-binding motif, single-stranded-interacting pro	RBMS1	4.15	3.39	3.45	1.7	0	6.7	TRUE	TRUE	TRUE	3
Q14444	CAPRIN1 Caprin-1	CAPRIN1	4.02	3.28	3.45	1.39	1.14	0.53	TRUE	TRUE	TRUE	3
P50213	IDH3A Isocitrate dehydrogenase	IDH3A	6.71	3.25	3.45	5.26	0.47	0.81	TRUE	TRUE	TRUE	3
P25398	RPS12 40S ribosomal protein S12	RPS12	3.46	2.8	3.45	0.69	0.82	0.37	TRUE	TRUE	TRUE	3
P35637	FUS RNA-binding protein FUS	FUS	4.3	3.78	3.44	1.57	4.4	1.07	TRUE	TRUE	TRUE	3
Q9BY42	C20orf43 UPF0549 protein C20orf43	C20orf43	9.91	3.41	3.44	7.2	5.6	0.28	TRUE	TRUE	TRUE	3
Q96AE4	FUBP1 Far upstream element-binding protein 1	FUBP1	4.78	2.97	3.44	3.42	1.01	0.66	TRUE	TRUE	TRUE	3
Q9NT62	ATG3 Ubiquitin-like-conjugating enzyme ATG3	ATG3	2.33	2.97	3.44	0.42	7.08	0.4	TRUE	TRUE	TRUE	3
Q9Y371	SH3GLB1 Endophilin-B1	SH3GLB1	2.72	2.12	3.43	0	0	0	TRUE	TRUE	TRUE	3
P48047	ATP5O ATP synthase subunit O, mitochondrial	ATP5O	4.9	4.78	3.42	1.46	3.54	0.75	TRUE	TRUE	TRUE	3
P13804	ETFA Electron transfer flavoprotein subunit alpha, mito	ETFA	3.63	3.25	3.42	1.03	0.42	0.95	TRUE	TRUE	TRUE	3
Q9Y5A9	YTHDF2 YTH domain family protein 2	YTHDF2	3.8	3.09	3.42	1.51	0	1.77	TRUE	TRUE	TRUE	3
Q8N0X7	SPG20 Spartin	SPG20	8.35	2.2	3.42	9.4	1.8	1.82	TRUE	TRUE	TRUE	3
Q9NVH1	DNAJC11 DnaJ homolog subfamily C member 11	DNAJC11	2.4	6.78	3.41	1.23	0	0	TRUE	TRUE	TRUE	3
A6NE09	RPSAP58 Protein RPSAP58	RPSAP58	4.46	3.38	3.41	2.69	0.56	1.03	TRUE	TRUE	TRUE	3
P52943	CRIP2 Cysteine-rich protein 2	CRIP2	3.72	3.11	3.41	0.44	0.2	0.72	TRUE	TRUE	TRUE	3
Q9NX63	CHCHD3 Coiled-coil-helix-coiled-coil-helix domain-contain	CHCHD3	3.13	3.41	3.38	0.84	1.27	2.08	TRUE	TRUE	TRUE	3
Q12904	AIMP1 Aminoacyl tRNA synthase complex-interacting multif	AIMP1	3.75	3.15	3.38	4.18	5.24	5.08	TRUE	TRUE	TRUE	3
Q96EP5	DAZAP1 DAZ-associated protein 1	DAZAP1	2.33	2.34	3.38	0	0.28	1.04	TRUE	TRUE	TRUE	3
O15160	POLR1C DNA-directed RNA polymerases I and III subunit RPA	POLR1C	2.64	2.05	3.38	0	5.96	1.18	TRUE	TRUE	TRUE	3
P30533	LRPAP1 Alpha-2-macroglobulin receptor-associated protein	LRPAP1	4.19	3.91	3.37	1.6	1.16	0.6	TRUE	TRUE	TRUE	3
Q02790	FKBP4 Peptidyl-prolyl cis-trans isomerase FKBP4	FKBP4	4.2	3.4	3.37	2.81	2.43	2.29	TRUE	TRUE	TRUE	3
P20290	BTF3 Transcription factor BTF3	BTF3	4.11	3.31	3.37	2.71	4.16	1.44	TRUE	TRUE	TRUE	3
Q15459	SF3A1 Splicing factor 3A subunit 1	SF3A1	4	3.68	3.36	3.94	1.13	3.37	TRUE	TRUE	TRUE	3
Q9Y285	FARSA Phenylalanine--tRNA ligase alpha subunit	FARSA	3.34	3.61	3.36	4.09	1.63	3.17	TRUE	TRUE	TRUE	3
O60493	SNX3 Sorting nexin-3	SNX3	2.63	3.27	3.36	0.16	0	0.56	TRUE	TRUE	TRUE	3
P30085	CMPK1 UMP-CMP kinase	CMPK1	4.2	3.17	3.36	5.81	2.05	1.72	TRUE	TRUE	TRUE	3
P78347	GTF2I General transcription factor II-I	GTF2I	4.03	3.19	3.35	3.71	3.48	0.99	TRUE	TRUE	TRUE	3
Q9Y6D9	MAD1L1 Mitotic spindle assembly checkpoint protein MAD1	MAD1L1	11.07	2.19	3.35	5.55	0	0	TRUE	TRUE	TRUE	3
P38159	RBMX RNA-binding motif protein, X chromosome	RBMX	3.16	3.03	3.34	0.33	0.71	0.43	TRUE	TRUE	TRUE	3
Q12874	SF3A3 Splicing factor 3A subunit 3	SF3A3	4.51	2.84	3.34	4.72	0.62	1	TRUE	TRUE	TRUE	3
Q13451	FKBP5 Peptidyl-prolyl cis-trans isomerase FKBP5	FKBP5	3.22	3.02	3.32	1.06	0.72	1.64	TRUE	TRUE	TRUE	3
O94826	TOMM70A Mitochondrial import receptor subunit TOM70	TOMM70A	3.79	3.11	3.31	0.97	0.66	5.52	TRUE	TRUE	TRUE	3
P20810	CAST Calpastatin	CAST	4.03	3.23	3.3	4.82	2.98	1.96	TRUE	TRUE	TRUE	3
Q9NZW5	MPP6 MAGUK p55 subfamily member 6	MPP6	15	2.92	3.3	0	0	0.57	TRUE	TRUE	TRUE	3
Q9ULC4	MCTS1 Malignant T-cell-amplified sequence 1	MCTS1	3.53	2.54	3.3	0	1.29	2.34	TRUE	TRUE	TRUE	3
Q92945	KHSRP Far upstream element-binding protein 2	KHSRP	4.87	3.65	3.29	4.09	1.1	0.99	TRUE	TRUE	TRUE	3
Q13177	PAK2 Serine/threonine-protein kinase PAK 2	PAK2	4.04	2.82	3.29	2.1	2.76	0.56	TRUE	TRUE	TRUE	3
P46013	MKI67 Antigen KI-67	MKI67	2.75	2.57	3.29	4.63	0.68	2.93	TRUE	TRUE	TRUE	3
Q9BTC0	DIDO1 Death-inducer obliterator 1	DIDO1	2.55	2.08	3.29	6.32	0	1.09	TRUE	TRUE	TRUE	3
P05455	SSB Lupus La protein	SSB	3.81	3.69	3.26	2.96	3.83	1.31	TRUE	TRUE	TRUE	3
P35659	DEK Protein DEK	DEK	3.88	3.04	3.26	1.73	0.63	0.86	TRUE	TRUE	TRUE	3
O75832	PSMD10 26S proteasome non-ATPase regulatory subunit 10	PSMD10	3.14	8.5	3.25	1.74	9.19	1.65	TRUE	TRUE	TRUE	3
Q9NX20	MRPL16 39S ribosomal protein L16, mitochondrial	MRPL16	7.04	4.04	3.25	7.66	0	0	TRUE	TRUE	TRUE	3
Q15691	MAPRE1 Microtubule-associated protein RP/EB family member	MAPRE1	5.1	3.17	3.25	4.46	0.39	0.8	TRUE	TRUE	TRUE	3
P62888	RPL30 60S ribosomal protein L30	RPL30	3.41	2.73	3.25	0.82	0.57	0.51	TRUE	TRUE	TRUE	3
Q9NSK0	KLC4 Kinesin light chain 4	KLC4	4.71	2.71	3.25	0	1.89	1	TRUE	TRUE	TRUE	3
Q15006	EMC2 ER membrane protein complex subunit 2	EMC2	3.36	5.19	3.24	0.11	1.42	0	TRUE	TRUE	TRUE	3
Q9NVI7	ATAD3A ATPase family AAA domain-containing protein 3A	ATAD3A	3.45	2.85	3.24	4.12	1.02	1.3	TRUE	TRUE	TRUE	3
P07686	HEXB Beta-hexosaminidase subunit beta	HEXB	6.79	6.66	3.23	0	5.32	0.41	TRUE	TRUE	TRUE	3
P36873	PPP1CC Serine/threonine-protein phosphatase PP1-gamma cat	PPP1CC	3.05	3.13	3.23	3.52	4.19	4.12	TRUE	TRUE	TRUE	3
Q9H223	EHD4 EH domain-containing protein 4	EHD4	4.1	2.77	3.23	3.68	1.49	0.92	TRUE	TRUE	TRUE	3
Q99933	BAG1 BAG family molecular chaperone regulator 1	BAG1	4.21	4.2	3.22	1.55	0.76	1.6	TRUE	TRUE	TRUE	3
P13639	EEF2 Elongation factor 2	EEF2	3.57	3.05	3.22	2.67	0.77	1.94	TRUE	TRUE	TRUE	3
P54819	AK2 Adenylate kinase 2, mitochondrial	AK2	3.24	2.58	3.22	5.33	0.77	0.92	TRUE	TRUE	TRUE	3
Q9H444	CHMP4B Charged multivesicular body protein 4b	CHMP4B	3.89	3.91	3.21	0.45	1.51	0.61	TRUE	TRUE	TRUE	3
P37108	SRP14 Signal recognition particle 14 kDa protein	SRP14	3.39	3.1	3.21	1.48	4.52	0.48	TRUE	TRUE	TRUE	3
P21291	CSRP1 Cysteine and glycine-rich protein 1	CSRP1	4.04	3	3.21	1.02	0.81	1.21	TRUE	TRUE	TRUE	3
Q9H788	SH2D4A SH2 domain-containing protein 4A	SH2D4A	4.54	3.44	3.2	6.1	5.9	0.23	TRUE	TRUE	TRUE	3
P62633	CNBP Cellular nucleic acid-binding protein	CNBP	3.5	3.09	3.2	5.2	0.15	5.26	TRUE	TRUE	TRUE	3
P41214	EIF2D Eukaryotic translation initiation factor 2D	EIF2D	2.72	2.9	3.2	1.42	0	2.99	TRUE	TRUE	TRUE	3
P30084	ECHS1 Enoyl-CoA hydratase, mitochondrial	ECHS1	2.99	2.82	3.2	2	0.61	0.43	TRUE	TRUE	TRUE	3
P61289	PSME3 Proteasome activator complex subunit 3	PSME3	3.78	8.71	3.19	4.09	8.9	0.54	TRUE	TRUE	TRUE	3
Q9UMS4	PRPF19 Pre-mRNA-processing factor 19	PRPF19	4.03	3.27	3.19	2.41	3.46	0.69	TRUE	TRUE	TRUE	3
O95347	SMC2 Structural maintenance of chromosomes protein 2	SMC2	3.7	3	3.19	2.36	1.54	2.66	TRUE	TRUE	TRUE	3
Q16222	UAP1 UDP-N-acetylhexosamine pyrophosphorylase	UAP1	3.66	2.67	3.19	1.11	0	0	TRUE	TRUE	TRUE	3
P23368	ME2 NAD-dependent malic enzyme, mitochondrial	ME2	2.59	2.64	3.19	1.33	0.46	1.81	TRUE	TRUE	TRUE	3
P61011	SRP54 Signal recognition particle 54 kDa protein	SRP54	5.3	3.17	3.18	4.37	1.46	0.58	TRUE	TRUE	TRUE	3
P19525	EIF2AK2 Interferon-induced, double-stranded RNA-activated	EIF2AK2	4.38	3.13	3.18	4.03	3.8	1.05	TRUE	TRUE	TRUE	3
O43399	TPD52L2 Tumor protein D54	TPD52L2	2.65	5.87	3.17	0.31	0	2.57	TRUE	TRUE	TRUE	3
Q16543	CDC37 Hsp90 co-chaperone Cdc37	CDC37	4.1	3.15	3.17	1.47	0.75	3.8	TRUE	TRUE	TRUE	3
O76094	SRP72 Signal recognition particle 72 kDa protein	SRP72	2.66	2.71	3.17	1.57	4.1	0.95	TRUE	TRUE	TRUE	3
P55769	NHP2L1 NHP2-like protein 1	NHP2L1	2.79	2.34	3.17	0.75	0.52	1.17	TRUE	TRUE	TRUE	3
Q92541	RTF1 RNA polymerase-associated protein RTF1 homolog	RTF1	4.79	2.65	3.16	5.16	0.38	2.44	TRUE	TRUE	TRUE	3
Q96QR8	PURB Transcriptional activator protein Pur-beta	PURB	8.54	4.09	3.15	9.14	0	0	TRUE	TRUE	TRUE	3
P04181	OAT Ornithine aminotransferase, mitochondrial	OAT	3.94	3.34	3.15	5.31	0.68	0.92	TRUE	TRUE	TRUE	3
Q6YN16	HSDL2 Hydroxysteroid dehydrogenase-like protein 2	HSDL2	3.96	2.94	3.14	2.11	3.87	3.21	TRUE	TRUE	TRUE	3
Q9BXW7	CECR5 Cat eye syndrome critical region protein 5	CECR5	2.18	15	3.13	0	0	0	TRUE	TRUE	TRUE	3
P23396	RPS3 40S ribosomal protein S3	RPS3	3.67	3.22	3.13	1.2	0.45	0.53	TRUE	TRUE	TRUE	3
Q16851	UGP2 UTP--glucose-1-phosphate uridylyltransferase	UGP2	3	2.83	3.13	0.94	3.52	0.44	TRUE	TRUE	TRUE	3
Q99439	CNN2 Calponin-2	CNN2	3.91	3.15	3.12	4.58	0.95	0.87	TRUE	TRUE	TRUE	3
Q02241	KIF23 Kinesin-like protein KIF23	KIF23	3.1	2.75	3.12	1.01	0.77	2.3	TRUE	TRUE	TRUE	3
P47756	CAPZB F-actin-capping protein subunit beta	CAPZB	3.51	2.68	3.12	2.84	2.01	0.22	TRUE	TRUE	TRUE	3
Q9Y3Z3	SAMHD1 SAM domain and HD domain-containing protein 1	SAMHD1	3.79	3.78	3.11	3.99	5.42	1.14	TRUE	TRUE	TRUE	3
Q9UPQ0	LIMCH1 LIM and calponin homology domains-containing prote	LIMCH1	3.58	2.04	3.11	5.38	1.03	2.2	TRUE	TRUE	TRUE	3
P50897	PPT1 Palmitoyl-protein thioesterase 1	PPT1	2.13	5.28	3.1	0.44	4.33	0.74	TRUE	TRUE	TRUE	3
P34896	SHMT1 Serine hydroxymethyltransferase, cytosolic	SHMT1	3.38	2.88	3.1	1.87	0.49	0.83	TRUE	TRUE	TRUE	3
P10644	PRKAR1A cAMP-dependent protein kinase type I-alpha regulat	PRKAR1A	3.55	2.57	3.1	5.41	0.83	0.51	TRUE	TRUE	TRUE	3
P60900	PSMA6 Proteasome subunit alpha type-6	PSMA6	3.87	2.73	3.09	4.36	0.72	0.82	TRUE	TRUE	TRUE	3
Q01085	TIAL1 Nucleolysin TIAR	TIAL1	3.46	2.62	3.09	5.07	0.64	0.5	TRUE	TRUE	TRUE	3
P11908	PRPS2 Ribose-phosphate pyrophosphokinase 2	PRPS2	2.68	2.46	3.09	1.18	0.91	5.37	TRUE	TRUE	TRUE	3
P60891	PRPS1 Ribose-phosphate pyrophosphokinase 1	PRPS1	3.16	2.33	3.09	0.49	0.68	4.67	TRUE	TRUE	TRUE	3
P50552	VASP Vasodilator-stimulated phosphoprotein	VASP	2.58	3.13	3.08	3.55	0.56	1.13	TRUE	TRUE	TRUE	3
P00505	GOT2 Aspartate aminotransferase, mitochondrial	GOT2	4.14	3.03	3.08	1.1	4.14	0.74	TRUE	TRUE	TRUE	3
P17980	PSMC3 26S protease regulatory subunit 6A	PSMC3	3.53	3.02	3.08	2.71	4.53	4.56	TRUE	TRUE	TRUE	3
Q15417	CNN3 Calponin-3	CNN3	4.27	2.88	3.08	2.75	3.89	5.14	TRUE	TRUE	TRUE	3
Q96AG4	LRRC59 Leucine-rich repeat-containing protein 59	LRRC59	3.75	2.58	3.08	1.19	1.16	1.58	TRUE	TRUE	TRUE	3
P40121	CAPG Macrophage-capping protein	CAPG	2.63	2.58	3.08	2.46	0.7	4.32	TRUE	TRUE	TRUE	3
O14562	UBFD1 Ubiquitin domain-containing protein UBFD1	UBFD1	15	4.97	3.07	0	0	1.6	TRUE	TRUE	TRUE	3
Q09666	AHNAK Neuroblast differentiation-associated protein AHNA	AHNAK	3.62	3.04	3.07	2.45	1.88	2.13	TRUE	TRUE	TRUE	3
P12270	TPR Nucleoprotein TPR	TPR	3.33	2.75	3.07	2.9	0.96	3.17	TRUE	TRUE	TRUE	3
P62081	RPS7 40S ribosomal protein S7	RPS7	3.39	2.54	3.07	1.04	0.68	0.9	TRUE	TRUE	TRUE	3
Q9NQ88	TIGAR Fructose-2,6-bisphosphatase TIGAR	TIGAR	2.81	2.46	3.07	0.78	1.41	0	TRUE	TRUE	TRUE	3
P62937	PPIA Peptidyl-prolyl cis-trans isomerase A	PPIA	4.13	2.98	3.06	3.52	2.23	1.05	TRUE	TRUE	TRUE	3
Q6IBS0	TWF2 Twinfilin-2	TWF2	3.06	2.7	3.06	3.65	0.57	0.82	TRUE	TRUE	TRUE	3
P41250	GARS Glycine--tRNA ligase	GARS	3.79	2.46	3.06	1.21	3.68	3.26	TRUE	TRUE	TRUE	3
P53004	BLVRA Biliverdin reductase A	BLVRA	4.07	2.19	3.06	0	0.62	2.14	TRUE	TRUE	TRUE	3
P09382	LGALS1 Galectin-1	LGALS1	2.37	2.17	3.05	0.37	0.27	5.47	TRUE	TRUE	TRUE	3
Q92820	GGH Gamma-glutamyl hydrolase	GGH	5.18	5.53	3.04	5.46	0	0	TRUE	TRUE	TRUE	3
Q9UI10	EIF2B4 Translation initiation factor eIF-2B subunit delta	EIF2B4	4.87	3.75	3.04	6.67	1.27	0.85	TRUE	TRUE	TRUE	3
Q99714	HSD17B10 3-hydroxyacyl-CoA dehydrogenase type-2	HSD17B10	3.04	3.58	3.04	4.19	3.75	1.08	TRUE	TRUE	TRUE	3
Q9Y265	RUVBL1 RuvB-like 1	RUVBL1	3.15	2.82	3.04	3	0.55	3.94	TRUE	TRUE	TRUE	3
P48637	GSS Glutathione synthetase	GSS	3.79	3.23	3.03	0.52	3.97	4.09	TRUE	TRUE	TRUE	3
Q16658	FSCN1 Fascin	FSCN1	3.9	3.08	3.03	1.88	0.6	2.62	TRUE	TRUE	TRUE	3
Q08379	GOLGA2 Golgin subfamily A member 2	GOLGA2	4.57	2.94	3.03	2.27	0	3.64	TRUE	TRUE	TRUE	3
P22392	NME2 Nucleoside diphosphate kinase B	NME2	3.06	2.59	3.03	2.8	3.14	2.84	TRUE	TRUE	TRUE	3
Q53EL6	PDCD4 Programmed cell death protein 4	PDCD4	3.52	2.53	3.03	2.83	1.11	0.77	TRUE	TRUE	TRUE	3
P53367	ARFIP1 Arfaptin-1	ARFIP1	2.9	2.49	3.03	1.25	0.3	2.3	TRUE	TRUE	TRUE	3
Q9NUQ3	TXLNG Gamma-taxilin	TXLNG	3.2	2.27	3.03	0.8	0.56	3.24	TRUE	TRUE	TRUE	3
Q9H9A6	LRRC40 Leucine-rich repeat-containing protein 40	LRRC40	3.29	6.93	3.02	0.56	0	0	TRUE	TRUE	TRUE	3
Q16698	DECR1 2,4-dienoyl-CoA reductase, mitochondrial	DECR1	7.52	4.15	3.02	0	0	0.58	TRUE	TRUE	TRUE	3
Q9UNH7	SNX6 Sorting nexin-6	SNX6	3.32	2.34	3.02	0.29	0.6	0.62	TRUE	TRUE	TRUE	3
P09622	DLD Dihydrolipoyl dehydrogenase, mitochondrial	DLD	3.04	2.1	3.02	0.91	0.68	1.66	TRUE	TRUE	TRUE	3
Q15365	PCBP1 Poly(rC)-binding protein 1	PCBP1	3.44	2.97	3.01	1.08	0.67	1.15	TRUE	TRUE	TRUE	3
Q14980	NUMA1 Nuclear mitotic apparatus protein 1	NUMA1	3.34	2.68	3.01	3.12	1.47	3.18	TRUE	TRUE	TRUE	3
P49411	TUFM Elongation factor Tu, mitochondrial	TUFM	3.38	2.61	3.01	2.26	0.63	1.05	TRUE	TRUE	TRUE	3
Q15555	MAPRE2 Microtubule-associated protein RP/EB family member	MAPRE2	2.14	2.49	3.01	4.63	0.87	0.39	TRUE	TRUE	TRUE	3
P82650	MRPS22 28S ribosomal protein S22, mitochondrial	MRPS22	2.89	2.12	3.01	0	0.19	1.42	TRUE	TRUE	TRUE	3
Q96PK6	RBM14 RNA-binding protein 14	RBM14	4.25	3.96	3	0.97	0	0.71	TRUE	TRUE	TRUE	3
P23284	PPIB Peptidyl-prolyl cis-trans isomerase B	PPIB	3.72	3	3	1.34	1.11	2.04	TRUE	TRUE	TRUE	3
P49321	NASP Nuclear autoantigenic sperm protein	NASP	3.15	2.94	3	0.6	0.63	0.39	TRUE	TRUE	TRUE	3
P30086	PEBP1 Phosphatidylethanolamine-binding protein 1	PEBP1	3.3	2.92	3	1.69	0.69	0.37	TRUE	TRUE	TRUE	3
Q9P0V9	SEPT10 Septin-10	2017-09-10	3.92	2.86	3	1.17	1.93	0.26	TRUE	TRUE	TRUE	3
P29692	EEF1D Elongation factor 1-delta	EEF1D	3.23	2.82	3	1.38	1.05	2.06	TRUE	TRUE	TRUE	3
P07954	FH Fumarate hydratase, mitochondrial	FH	3.31	2.8	3	1.77	1.03	0.82	TRUE	TRUE	TRUE	3
Q15366	PCBP2 Poly(rC)-binding protein 2	PCBP2	3.35	2.63	3	0.59	0.42	1.34	TRUE	TRUE	TRUE	3
P57721	PCBP3 Poly(rC)-binding protein 3	PCBP3	3.45	2.53	3	0.57	0.52	1.57	TRUE	TRUE	TRUE	3
Q96EK5	KIAA1279 KIF1-binding protein	KIAA1279	3.09	2.99	2.99	4.63	0.78	1.01	TRUE	TRUE	TRUE	3
P30405	PPIF Peptidyl-prolyl cis-trans isomerase F, mitochondri	PPIF	3.52	2.85	2.99	0.4	1.19	0	TRUE	TRUE	TRUE	3
P06730	EIF4E Eukaryotic translation initiation factor 4E	EIF4E	2.03	2.45	2.99	0.3	0.21	0.35	TRUE	TRUE	TRUE	3
Q96EK6	GNPNAT1 Glucosamine 6-phosphate N-acetyltransferase	GNPNAT1	4.25	6.88	2.98	0.45	5.55	0.73	TRUE	TRUE	TRUE	3
H0YHG0	Uncharacterized protein	Uncharacterized	4.34	4.7	2.98	3.28	0.71	3.01	TRUE	TRUE	TRUE	3
P82979	SARNP SAP domain-containing ribonucleoprotein	SARNP	4.34	4.7	2.98	3.28	0.71	3.01	TRUE	TRUE	TRUE	3
Q9Y696	CLIC4 Chloride intracellular channel protein 4	CLIC4	4.27	3.29	2.98	4.64	1.13	0.64	TRUE	TRUE	TRUE	3
Q9UQE7	SMC3 Structural maintenance of chromosomes protein 3	SMC3	3.86	3.28	2.98	2.57	1.46	2.6	TRUE	TRUE	TRUE	3
O43237	DYNC1LI2 Cytoplasmic dynein 1 light intermediate chain 2	DYNC1LI2	2.38	3.07	2.98	1.31	1.97	0.66	TRUE	TRUE	TRUE	3
P28070	PSMB4 Proteasome subunit beta type-4	PSMB4	3.16	2.92	2.98	4.37	0.85	0	TRUE	TRUE	TRUE	3
P11021	HSPA5 78 kDa glucose-regulated protein	HSPA5	3.42	2.88	2.98	2.09	0.67	1.96	TRUE	TRUE	TRUE	3
P62195	PSMC5 26S protease regulatory subunit 8	PSMC5	2.91	2.66	2.98	2.65	3.24	0.54	TRUE	TRUE	TRUE	3
Q16891	IMMT Mitochondrial inner membrane protein	IMMT	3.5	2.31	2.98	5.92	0.57	0.18	TRUE	TRUE	TRUE	3
O95831	AIFM1 Apoptosis-inducing factor 1, mitochondrial	AIFM1	3.62	3.29	2.97	2.28	0.77	0.3	TRUE	TRUE	TRUE	3
P30837	ALDH1B1 Aldehyde dehydrogenase X, mitochondrial	ALDH1B1	2.66	3.06	2.97	1.62	0.56	1.1	TRUE	TRUE	TRUE	3
P12004	PCNA Proliferating cell nuclear antigen	PCNA	3.69	2.91	2.97	3.98	0.52	0.9	TRUE	TRUE	TRUE	3
P60866	RPS20 40S ribosomal protein S20	RPS20	3.36	2.9	2.97	0.25	0.36	1.68	TRUE	TRUE	TRUE	3
P25685	DNAJB1 DnaJ homolog subfamily B member 1	DNAJB1	3.56	2.73	2.97	0.5	4.39	0.99	TRUE	TRUE	TRUE	3
Q9UDY4	DNAJB4 DnaJ homolog subfamily B member 4	DNAJB4	3.65	2.71	2.97	0.87	0.26	0.31	TRUE	TRUE	TRUE	3
Q96DH6	MSI2 RNA-binding protein Musashi homolog 2	MSI2	2.77	2.21	2.97	1.1	0.76	0.88	TRUE	TRUE	TRUE	3
P51553	IDH3G Isocitrate dehydrogenase	IDH3G	3.47	3.63	2.96	6.94	0.84	7.21	TRUE	TRUE	TRUE	3
Q9BRA2	TXNDC17 Thioredoxin domain-containing protein 17	TXNDC17	4.45	3.31	2.96	0	0	0	TRUE	TRUE	TRUE	3
Q8WU90	ZC3H15 Zinc finger CCCH domain-containing protein 15	ZC3H15	4.29	3.08	2.96	4.08	0.55	1.95	TRUE	TRUE	TRUE	3
Q9P0L0	VAPA Vesicle-associated membrane protein-associated pro	VAPA	3.08	2.89	2.96	0.57	3.89	1.05	TRUE	TRUE	TRUE	3
P62191	PSMC1 26S protease regulatory subunit 4	PSMC1	3.82	2.7	2.96	0.89	0.8	0.5	TRUE	TRUE	TRUE	3
Q14192	FHL2 Four and a half LIM domains protein 2	FHL2	4	2.25	2.96	6.09	0.17	5.63	TRUE	TRUE	TRUE	3
Q14847	LASP1 LIM and SH3 domain protein 1	LASP1	6.17	4.07	2.95	4.87	4.38	0.45	TRUE	TRUE	TRUE	3
Q9UBU8	MORF4L1 Mortality factor 4-like protein 1	MORF4L1	3.02	3.16	2.95	0.21	0.67	7.14	TRUE	TRUE	TRUE	3
P48643	CCT5 T-complex protein 1 subunit epsilon	CCT5	3.48	2.61	2.95	2.75	1.97	1.21	TRUE	TRUE	TRUE	3
Q8N684	CPSF7 Cleavage and polyadenylation specificity factor su	CPSF7	2.91	2.57	2.95	1.4	0.37	0.26	TRUE	TRUE	TRUE	3
P51659	HSD17B4 Peroxisomal multifunctional enzyme type 2	HSD17B4	3.55	2.53	2.95	3.3	0.39	3.66	TRUE	TRUE	TRUE	3
Q9BV44	THUMPD3 THUMP domain-containing protein 3	THUMPD3	15	2.13	2.95	0	0	0.45	TRUE	TRUE	TRUE	3
Q8TCS8	PNPT1 Polyribonucleotide nucleotidyltransferase 1, mitoc	PNPT1	5.03	3.68	2.94	5.27	1.44	1.03	TRUE	TRUE	TRUE	3
O14776	TCERG1 Transcription elongation regulator 1	TCERG1	3.64	3.27	2.94	2.75	3.51	0.93	TRUE	TRUE	TRUE	3
P12429	ANXA3 Annexin A3	ANXA3	3.73	2.97	2.94	2.73	1.38	0.77	TRUE	TRUE	TRUE	3
P38646	HSPA9 Stress-70 protein, mitochondrial	HSPA9	3.31	2.75	2.94	2.46	1.46	0.71	TRUE	TRUE	TRUE	3
P17987	TCP1 T-complex protein 1 subunit alpha	TCP1	3.96	2.66	2.94	0.92	0.6	2.47	TRUE	TRUE	TRUE	3
Q13492	PICALM Phosphatidylinositol-binding clathrin assembly pro	PICALM	6.1	2.45	2.94	3.45	0.06	2.34	TRUE	TRUE	TRUE	3
Q16186	ADRM1 Proteasomal ubiquitin receptor ADRM1	ADRM1	3.03	2.33	2.94	0	5.19	0.68	TRUE	TRUE	TRUE	3
Q8WUM4	PDCD6IP Programmed cell death 6-interacting protein	PDCD6IP	3.19	2.31	2.94	1.48	0.61	2.7	TRUE	TRUE	TRUE	3
Q13404	UBE2V1 Ubiquitin-conjugating enzyme E2 variant 1	UBE2V1	3.65	4.46	2.93	0	2.51	0	TRUE	TRUE	TRUE	3
P62913	RPL11 60S ribosomal protein L11	RPL11	3.81	2.98	2.93	0.71	0.78	0.69	TRUE	TRUE	TRUE	3
P62249	RPS16 40S ribosomal protein S16	RPS16	3.17	2.82	2.93	1.21	0.49	0.18	TRUE	TRUE	TRUE	3
P20073	ANXA7 Annexin A7	ANXA7	4.55	2.35	2.93	1	0.08	0.37	TRUE	TRUE	TRUE	3
Q14151	SAFB2 Scaffold attachment factor B2	SAFB2	5.11	8.43	2.92	6.07	9.3	1.82	TRUE	TRUE	TRUE	3
O14818	PSMA7 Proteasome subunit alpha type-7	PSMA7	3.15	3.05	2.92	1.21	3.2	0.7	TRUE	TRUE	TRUE	3
P13674	P4HA1 Prolyl 4-hydroxylase subunit alpha-1	P4HA1	3.01	2.58	2.92	4.9	0.67	0.42	TRUE	TRUE	TRUE	3
Q567U6	CCDC93 Coiled-coil domain-containing protein 93	CCDC93	2.91	6.99	2.91	1.07	4.89	0.93	TRUE	TRUE	TRUE	3
P09525	ANXA4 Annexin A4	ANXA4	3.83	5.96	2.91	3.91	4.24	0.27	TRUE	TRUE	TRUE	3
Q86UE4	MTDH Protein LYRIC	MTDH	3.17	3.8	2.91	0.4	0	0	TRUE	TRUE	TRUE	3
P25705	ATP5A1 ATP synthase subunit alpha, mitochondrial	ATP5A1	3.42	2.96	2.91	0.69	0.59	2.14	TRUE	TRUE	TRUE	3
Q8TDX7	NEK7 Serine/threonine-protein kinase Nek7	NEK7	5.06	2.56	2.91	0	1.09	0.56	TRUE	TRUE	TRUE	3
Q9BZK7	TBL1XR1 F-box-like/WD repeat-containing protein TBL1XR1	TBL1XR1	2.21	2.39	2.91	7.79	1.73	0.32	TRUE	TRUE	TRUE	3
P51991	HNRNPA3 Heterogeneous nuclear ribonucleoprotein A3	HNRNPA3	2.52	2.3	2.91	0.86	0.82	4.5	TRUE	TRUE	TRUE	3
P62826	RAN GTP-binding nuclear protein Ran	RAN	4.2	2.84	2.9	4.83	0.77	3.62	TRUE	TRUE	TRUE	3
Q99497	PARK7 Protein DJ-1	PARK7	3.7	2.7	2.9	4.19	0.48	0.8	TRUE	TRUE	TRUE	3
Q2TAY7	SMU1 WD40 repeat-containing protein SMU1	SMU1	3.4	2.62	2.9	0.86	1.93	0.77	TRUE	TRUE	TRUE	3
Q8TAF3	WDR48 WD repeat-containing protein 48	WDR48	3.04	2.5	2.9	0.34	0.98	0.29	TRUE	TRUE	TRUE	3
P51114	FXR1 Fragile X mental retardation syndrome-related prot	FXR1	3.37	2.38	2.9	0.88	1.16	0.89	TRUE	TRUE	TRUE	3
P17812	CTPS1 CTP synthase 1	CTPS1	3.31	2.6	2.89	2.65	3.47	0.81	TRUE	TRUE	TRUE	3
O75521	ECI2 Enoyl-CoA delta isomerase 2, mitochondrial	ECI2	4.53	15	2.88	2.97	0	1.87	TRUE	TRUE	TRUE	3
Q14320	FAM50A Protein FAM50A	FAM50A	3.66	3.77	2.88	2.03	3.76	0.72	TRUE	TRUE	TRUE	3
O00625	PIR Pirin	PIR	2.8	3.42	2.88	0.46	0.01	1.18	TRUE	TRUE	TRUE	3
P10515	DLAT Dihydrolipoyllysine-residue acetyltransferase comp	DLAT	3.44	3.16	2.88	1.03	0.53	0.66	TRUE	TRUE	TRUE	3
P31946	YWHAB 14-3-3 protein beta/alpha	YWHAB	4.15	2.94	2.88	0.94	0.78	0.46	TRUE	TRUE	TRUE	3
P63104	YWHAZ 14-3-3 protein zeta/delta	YWHAZ	4.16	2.85	2.88	1.5	0.64	0.57	TRUE	TRUE	TRUE	3
Q9UKM9	RALY RNA-binding protein Raly	RALY	2.44	2.59	2.88	1.28	3.98	0.99	TRUE	TRUE	TRUE	3
P61201	COPS2 COP9 signalosome complex subunit 2	COPS2	3.29	2.5	2.88	4.17	0.46	1.16	TRUE	TRUE	TRUE	3
P00558	PGK1 Phosphoglycerate kinase 1	PGK1	3.1	3.12	2.87	2.61	0.64	1.51	TRUE	TRUE	TRUE	3
P13667	PDIA4 Protein disulfide-isomerase A4	PDIA4	4.04	3.05	2.87	0.92	3.29	0.94	TRUE	TRUE	TRUE	3
P48444	ARCN1 Coatomer subunit delta	ARCN1	3.03	2.88	2.87	0.87	0.93	0.5	TRUE	TRUE	TRUE	3
O95239	KIF4A Chromosome-associated kinesin KIF4A	KIF4A	5.8	2.69	2.87	4.91	0.7	0.42	TRUE	TRUE	TRUE	3
P27348	YWHAQ 14-3-3 protein theta	YWHAQ	3.75	2.68	2.87	3.06	2.56	3.11	TRUE	TRUE	TRUE	3
P27694	RPA1 Replication protein A 70 kDa DNA-binding subunit	RPA1	2.84	2.64	2.87	1.95	3.75	0.81	TRUE	TRUE	TRUE	3
P50995	ANXA11 Annexin A11	ANXA11	3.33	2.61	2.87	0.63	0.62	0.75	TRUE	TRUE	TRUE	3
P40939	HADHA Trifunctional enzyme subunit alpha, mitochondrial	HADHA	3.44	2.54	2.87	3.75	0.87	1.28	TRUE	TRUE	TRUE	3
Q8NCA5	FAM98A Protein FAM98A	FAM98A	2.74	2.14	2.87	1.24	1.54	0.39	TRUE	TRUE	TRUE	3
O60437	PPL Periplakin	PPL	3.95	2.94	2.86	3.52	0.79	1.31	TRUE	TRUE	TRUE	3
P42765	ACAA2 3-ketoacyl-CoA thiolase, mitochondrial	ACAA2	3.24	2.91	2.86	1.26	1.1	4.31	TRUE	TRUE	TRUE	3
P36952	SERPINB5 Serpin B5	SERPINB5	3.08	2.73	2.86	3.73	0.41	1.53	TRUE	TRUE	TRUE	3
P45973	CBX5 Chromobox protein homolog 5	CBX5	6.07	2.45	2.86	1.65	0	3.08	TRUE	TRUE	TRUE	3
Q09028	RBBP4 Histone-binding protein RBBP4	RBBP4	2.18	2.09	2.86	2.22	0.56	2.08	TRUE	TRUE	TRUE	3
O60884	DNAJA2 DnaJ homolog subfamily A member 2	DNAJA2	2.56	2.07	2.86	0.54	0.3	0.38	TRUE	TRUE	TRUE	3
Q8WVM8	SCFD1 Sec1 family domain-containing protein 1	SCFD1	3.23	3.64	2.85	0.7	6.71	5.03	TRUE	TRUE	TRUE	3
P08133	ANXA6 Annexin A6	ANXA6	3.53	3.02	2.85	1.95	0.6	0.7	TRUE	TRUE	TRUE	3
Q14683	SMC1A Structural maintenance of chromosomes protein 1A	SMC1A	3.62	2.95	2.85	2.73	1.84	1.52	TRUE	TRUE	TRUE	3
Q14141	SEPT6 Septin-6	2017-09-06	3.69	2.51	2.85	1.94	1.12	0.23	TRUE	TRUE	TRUE	3
Q8WX93	PALLD Palladin	PALLD	3.53	2.48	2.85	3.79	3.36	3.74	TRUE	TRUE	TRUE	3
O75717	WDHD1 WD repeat and HMG-box DNA-binding protein 1	WDHD1	5.05	2.32	2.85	0	0	1.51	TRUE	TRUE	TRUE	3
Q8NBS9	TXNDC5 Thioredoxin domain-containing protein 5	TXNDC5	3.12	2.25	2.85	0.69	0.55	3.84	TRUE	TRUE	TRUE	3
P09601	HMOX1 Heme oxygenase 1	HMOX1	3.01	3.37	2.84	2.06	4.44	1.01	TRUE	TRUE	TRUE	3
P62495	ETF1 Eukaryotic peptide chain release factor subunit 1	ETF1	3.34	2.63	2.84	3.23	1.02	2.28	TRUE	TRUE	TRUE	3
Q00169	PITPNA Phosphatidylinositol transfer protein alpha isofor	PITPNA	4.17	3.4	2.83	6.72	6.92	0.16	TRUE	TRUE	TRUE	3
P43490	NAMPT Nicotinamide phosphoribosyltransferase	NAMPT	3.15	2.75	2.83	2.49	0.67	0.51	TRUE	TRUE	TRUE	3
Q9UJU6	DBNL Drebrin-like protein	DBNL	3.42	2.63	2.83	3.94	0.68	1.49	TRUE	TRUE	TRUE	3
P48739	PITPNB Phosphatidylinositol transfer protein beta isoform	PITPNB	3.54	2.28	2.83	2	0.6	1.56	TRUE	TRUE	TRUE	3
P61006	RAB8A Ras-related protein Rab-8A	RAB8A	3.6	2.23	2.83	0	0.96	0.05	TRUE	TRUE	TRUE	3
Q01844	EWSR1 RNA-binding protein EWS	EWSR1	2.84	2.14	2.83	4.12	0.45	0	TRUE	TRUE	TRUE	3
P54578	USP14 Ubiquitin carboxyl-terminal hydrolase 14	USP14	5.64	4.7	2.82	4.27	2.44	4.97	TRUE	TRUE	TRUE	3
O15305	PMM2 Phosphomannomutase 2	PMM2	3.66	2.26	2.82	0.08	0.27	0.25	TRUE	TRUE	TRUE	3
P15311	EZR Ezrin	EZR	3.25	2.96	2.81	1.56	1.09	1.06	TRUE	TRUE	TRUE	3
P78417	GSTO1 Glutathione S-transferase omega-1	GSTO1	4.34	2.9	2.81	4.26	0.92	0.43	TRUE	TRUE	TRUE	3
Q9NP74	PALMD Palmdelphin	PALMD	3.3	2.16	2.81	5.58	0	6.2	TRUE	TRUE	TRUE	3
O00154	ACOT7 Cytosolic acyl coenzyme A thioester hydrolase	ACOT7	3.37	2.75	2.8	0.96	0.38	4.17	TRUE	TRUE	TRUE	3
Q9UQ80	PA2G4 Proliferation-associated protein 2G4	PA2G4	3.36	2.43	2.8	2.43	0.43	0.83	TRUE	TRUE	TRUE	3
O43447	PPIH Peptidyl-prolyl cis-trans isomerase H	PPIH	2.94	2.31	2.8	1.29	0.69	0.29	TRUE	TRUE	TRUE	3
Q9BYX2	TBC1D2 TBC1 domain family member 2A	TBC1D2	4.7	2.98	2.79	0.9	0	1.5	TRUE	TRUE	TRUE	3
P40261	NNMT Nicotinamide N-methyltransferase	NNMT	2.91	2.82	2.79	0.3	0.5	0.35	TRUE	TRUE	TRUE	3
P62847	RPS24 40S ribosomal protein S24	RPS24	2.47	2.74	2.79	0.43	1	0.69	TRUE	TRUE	TRUE	3
Q99816	TSG101 Tumor susceptibility gene 101 protein	TSG101	4.24	2.38	2.79	1.08	0.56	0.89	TRUE	TRUE	TRUE	3
O00469	PLOD2 Procollagen-lysine,2-oxoglutarate 5-dioxygenase 2	PLOD2	3.36	2.7	2.78	1.47	0.38	0.37	TRUE	TRUE	TRUE	3
Q13107	USP4 Ubiquitin carboxyl-terminal hydrolase 4	USP4	8.98	2.68	2.78	8.51	7.45	0	TRUE	TRUE	TRUE	3
P36542	ATP5C1 ATP synthase subunit gamma, mitochondrial	ATP5C1	3.88	2.66	2.78	4.26	4.12	0.61	TRUE	TRUE	TRUE	3
Q99459	CDC5L Cell division cycle 5-like protein	CDC5L	3.01	2.59	2.78	1.16	0.43	1.29	TRUE	TRUE	TRUE	3
O94925	GLS Glutaminase kidney isoform, mitochondrial	GLS	3.25	2.37	2.78	1.06	0.6	1.7	TRUE	TRUE	TRUE	3
Q9NVA2	SEPT11 Septin-11	2017-09-11	3.46	2.36	2.78	0.95	0.97	0.41	TRUE	TRUE	TRUE	3
Q16666	IFI16 Gamma-interferon-inducible protein 16	IFI16	3.57	2.26	2.78	0.97	1.09	1.34	TRUE	TRUE	TRUE	3
P35241	RDX Radixin	RDX	3.14	2.69	2.77	2.22	2.04	1.31	TRUE	TRUE	TRUE	3
Q9BRX2	PELO Protein pelota homolog	PELO	3.63	6	2.76	0.21	5.96	0	TRUE	TRUE	TRUE	3
O60749	SNX2 Sorting nexin-2	SNX2	4.74	4.22	2.76	2.09	4.34	0.76	TRUE	TRUE	TRUE	3
P31153	MAT2A S-adenosylmethionine synthase isoform type-2	MAT2A	4.12	2.8	2.76	5.45	0.23	0.47	TRUE	TRUE	TRUE	3
Q9ULV4	CORO1C Coronin-1C	CORO1C	2.52	2.09	2.76	1.54	0.4	1.42	TRUE	TRUE	TRUE	3
Q9Y5X3	SNX5 Sorting nexin-5	SNX5	6.93	4.1	2.75	0.85	0	1.64	TRUE	TRUE	TRUE	3
P27695	APEX1 DNA-(apurinic or apyrimidinic site) lyase	APEX1	4.13	3.2	2.75	1.75	0.57	1.92	TRUE	TRUE	TRUE	3
P48735	IDH2 Isocitrate dehydrogenase	IDH2	3.84	2.89	2.75	4.87	1.01	5.55	TRUE	TRUE	TRUE	3
Q9NQG5	RPRD1B Regulation of nuclear pre-mRNA domain-containing p	RPRD1B	3.66	2.84	2.75	1.88	3.63	1.3	TRUE	TRUE	TRUE	3
Q13418	ILK Integrin-linked protein kinase	ILK	3.36	2.59	2.75	0.59	0.68	0.75	TRUE	TRUE	TRUE	3
Q13283	G3BP1 Ras GTPase-activating protein-binding protein 1	G3BP1	2.86	2.54	2.75	0.71	1.06	0.85	TRUE	TRUE	TRUE	3
Q15233	NONO Non-POU domain-containing octamer-binding protein	NONO	3.22	2.46	2.75	4.62	0.75	4.1	TRUE	TRUE	TRUE	3
Q13098	GPS1 COP9 signalosome complex subunit 1	GPS1	2.91	2.4	2.75	0.61	0.48	4.75	TRUE	TRUE	TRUE	3
P30838	ALDH3A1 Aldehyde dehydrogenase, dimeric NADP-preferring	ALDH3A1	3.81	2.31	2.75	1.02	3.37	0.56	TRUE	TRUE	TRUE	3
P15924	DSP Desmoplakin	DSP	2.91	2.09	2.75	3.51	0	1.03	TRUE	TRUE	TRUE	3
Q96DB5	FAM82B Regulator of microtubule dynamics protein 1	FAM82B	4.37	4.74	2.74	0	0	0.3	TRUE	TRUE	TRUE	3
Q14019	COTL1 Coactosin-like protein	COTL1	3.53	3.92	2.74	1.45	2.44	0.47	TRUE	TRUE	TRUE	3
Q9UNP9	PPIE Peptidyl-prolyl cis-trans isomerase E	PPIE	2.78	2.83	2.74	4.12	0	1.25	TRUE	TRUE	TRUE	3
P61978	HNRNPK Heterogeneous nuclear ribonucleoprotein K	HNRNPK	3.07	2.54	2.74	3.1	2.31	1.02	TRUE	TRUE	TRUE	3
Q13740	ALCAM CD166 antigen	ALCAM	4.05	2.25	2.74	1.42	0	0	TRUE	TRUE	TRUE	3
P67809	YBX1 Nuclease-sensitive element-binding protein 1	YBX1	2.37	3.79	2.73	0.78	0.59	0.33	TRUE	TRUE	TRUE	3
Q02809	PLOD1 Procollagen-lysine,2-oxoglutarate 5-dioxygenase 1	PLOD1	3.18	2.52	2.73	3.77	0.37	3.2	TRUE	TRUE	TRUE	3
P55209	NAP1L1 Nucleosome assembly protein 1-like 1	NAP1L1	3.44	2.69	2.72	1.61	0.21	0.29	TRUE	TRUE	TRUE	3
Q5T6F2	UBAP2 Ubiquitin-associated protein 2	UBAP2	3.97	2.54	2.72	6.35	1.06	0.73	TRUE	TRUE	TRUE	3
P17066	HSPA6 Heat shock 70 kDa protein 6	HSPA6	3.04	2.46	2.72	1.51	0.54	0.45	TRUE	TRUE	TRUE	3
Q8WWM7	ATXN2L Ataxin-2-like protein	ATXN2L	2.91	2.38	2.72	0.66	0.05	0.26	TRUE	TRUE	TRUE	3
O75874	IDH1 Isocitrate dehydrogenase	IDH1	3.34	2.58	2.71	2.74	1.06	0.46	TRUE	TRUE	TRUE	3
Q86UP2	KTN1 Kinectin	KTN1	3.24	2.58	2.71	0.93	1.13	2.24	TRUE	TRUE	TRUE	3
P52907	CAPZA1 F-actin-capping protein subunit alpha-1	CAPZA1	3.72	2.48	2.71	3.68	4.6	0.4	TRUE	TRUE	TRUE	3
P61981	YWHAG 14-3-3 protein gamma	YWHAG	3.54	2.43	2.71	1	0.63	0.81	TRUE	TRUE	TRUE	3
Q9UKS6	PACSIN3 Protein kinase C and casein kinase substrate in ne	PACSIN3	4.79	2.35	2.71	6.29	0.1	0.63	TRUE	TRUE	TRUE	3
Q9UHD8	SEPT9 Septin-9	2017-09-09	2.77	2.31	2.71	1.15	0.79	1.29	TRUE	TRUE	TRUE	3
P50454	SERPINH1 Serpin H1	SERPINH1	3.33	2.3	2.71	2.8	2.21	0.57	TRUE	TRUE	TRUE	3
P50579	METAP2 Methionine aminopeptidase 2	METAP2	2.92	2.83	2.7	6.09	0	0.13	TRUE	TRUE	TRUE	3
P26038	MSN Moesin	MSN	3.06	2.69	2.7	2.1	1.36	2.85	TRUE	TRUE	TRUE	3
P10909	CLU Clusterin	CLU	3.48	2.54	2.7	2.89	0.22	0.98	TRUE	TRUE	TRUE	3
Q9Y6G9	DYNC1LI1 Cytoplasmic dynein 1 light intermediate chain 1	DYNC1LI1	2.41	2.51	2.7	4.82	0.49	0.17	TRUE	TRUE	TRUE	3
Q9Y4L1	HYOU1 Hypoxia up-regulated protein 1	HYOU1	3.34	2.43	2.7	4.19	3.73	3.46	TRUE	TRUE	TRUE	3
P50991	CCT4 T-complex protein 1 subunit delta	CCT4	3.21	2.41	2.7	1.11	0.44	2.26	TRUE	TRUE	TRUE	3
Q9UHD1	CHORDC1 Cysteine and histidine-rich domain-containing prot	CHORDC1	2.08	2.39	2.7	0.84	0.83	0.57	TRUE	TRUE	TRUE	3
Q9UBT2	UBA2 SUMO-activating enzyme subunit 2	UBA2	2.88	2.1	2.7	2.28	0.95	4.61	TRUE	TRUE	TRUE	3
Q86TU7	SETD3 Histone-lysine N-methyltransferase setd3	SETD3	3.77	4.33	2.69	2.12	0.62	2.97	TRUE	TRUE	TRUE	3
Q9NP79	VTA1 Vacuolar protein sorting-associated protein VTA1 h	VTA1	3.6	3.2	2.69	1.51	0.31	0.68	TRUE	TRUE	TRUE	3
P62136	PPP1CA Serine/threonine-protein phosphatase PP1-alpha cat	PPP1CA	3.06	3.06	2.69	3.41	3.95	3.58	TRUE	TRUE	TRUE	3
Q13596	SNX1 Sorting nexin-1	SNX1	3.96	2.77	2.69	4.27	0.87	0.69	TRUE	TRUE	TRUE	3
P54577	YARS Tyrosine--tRNA ligase, cytoplasmic	YARS	3.39	2.73	2.69	1.57	0.66	2.55	TRUE	TRUE	TRUE	3
O95433	AHSA1 Activator of 90 kDa heat shock protein ATPase homo	AHSA1	3.28	2.7	2.69	0.24	0.59	0.77	TRUE	TRUE	TRUE	3
O15173	PGRMC2 Membrane-associated progesterone receptor componen	PGRMC2	3.68	2.51	2.69	0.16	0	1.29	TRUE	TRUE	TRUE	3
P84022	SMAD3 Mothers against decapentaplegic homolog 3	SMAD3	3.28	3.05	2.68	0	0	0	TRUE	TRUE	TRUE	3
P19338	NCL Nucleolin	NCL	3.33	2.53	2.68	1.01	0.64	1.58	TRUE	TRUE	TRUE	3
P52292	KPNA2 Importin subunit alpha-2	KPNA2	2.96	2.53	2.68	1.26	0.88	4.16	TRUE	TRUE	TRUE	3
Q15942	ZYX Zyxin	ZYX	3.81	2.46	2.68	1.03	0.32	0.51	TRUE	TRUE	TRUE	3
O00429	DNM1L Dynamin-1-like protein	DNM1L	4.33	2.41	2.68	1.33	0.7	0.61	TRUE	TRUE	TRUE	3
Q9HC38	GLOD4 Glyoxalase domain-containing protein 4	GLOD4	2.59	2.15	2.68	0.75	0.32	0.26	TRUE	TRUE	TRUE	3
Q04206	RELA Transcription factor p65	RELA	3.28	4.15	2.67	0	0	0	TRUE	TRUE	TRUE	3
P39019	RPS19 40S ribosomal protein S19	RPS19	2.67	2.68	2.67	1.13	1.77	1.99	TRUE	TRUE	TRUE	3
Q9Y6E0	STK24 Serine/threonine-protein kinase 24	STK24	2.77	2.59	2.67	0.76	0.47	0.41	TRUE	TRUE	TRUE	3
P63244	GNB2L1 Guanine nucleotide-binding protein subunit beta-2-	GNB2L1	3.02	2.58	2.67	2.57	2.63	0.88	TRUE	TRUE	TRUE	3
Q04917	YWHAH 14-3-3 protein eta	YWHAH	3.6	2.4	2.67	1.18	0.42	3.96	TRUE	TRUE	TRUE	3
P00492	HPRT1 Hypoxanthine-guanine phosphoribosyltransferase	HPRT1	2.46	2.31	2.67	0.8	0.62	0.28	TRUE	TRUE	TRUE	3
Q9P289	MST4 Serine/threonine-protein kinase MST4	MST4	2.77	2.26	2.67	0.68	0.63	0.54	TRUE	TRUE	TRUE	3
Q9Y305	ACOT9 Acyl-coenzyme A thioesterase 9, mitochondrial	ACOT9	3.39	2.16	2.67	0.93	1.03	0.35	TRUE	TRUE	TRUE	3
Q70E73	RAPH1 Ras-associated and pleckstrin homology domains-con	RAPH1	3.96	3.25	2.66	0	0.24	0.08	TRUE	TRUE	TRUE	3
P18206	VCL Vinculin	VCL	3.37	2.81	2.66	2.86	2.74	1.88	TRUE	TRUE	TRUE	3
Q92598	HSPH1 Heat shock protein 105 kDa	HSPH1	2.89	2.65	2.66	2.06	0.92	0.65	TRUE	TRUE	TRUE	3
Q9BYT8	NLN Neurolysin, mitochondrial	NLN	2.72	2.52	2.66	5.55	0.82	0.42	TRUE	TRUE	TRUE	3
Q04828	AKR1C1 Aldo-keto reductase family 1 member C1	AKR1C1	2.92	2.48	2.66	0.82	0.63	0.45	TRUE	TRUE	TRUE	3
P36507	MAP2K2 Dual specificity mitogen-activated protein kinase	MAP2K2	2.68	4.08	2.65	0.81	2.3	0.51	TRUE	TRUE	TRUE	3
O14579	COPE Coatomer subunit epsilon	COPE	7.51	3.2	2.65	5.04	0.52	0.06	TRUE	TRUE	TRUE	3
P24534	EEF1B2 Elongation factor 1-beta	EEF1B2	2.54	3.04	2.64	0.74	4.25	1.39	TRUE	TRUE	TRUE	3
Q9BY44	EIF2A Eukaryotic translation initiation factor 2A	EIF2A	3.27	2.8	2.64	3.15	3.81	0.88	TRUE	TRUE	TRUE	3
P16152	CBR1 Carbonyl reductase	CBR1	3.45	2.76	2.64	3.49	0.9	1.13	TRUE	TRUE	TRUE	3
Q9UBW8	COPS7A COP9 signalosome complex subunit 7a	COPS7A	3.02	2.7	2.64	0.36	0.77	1.23	TRUE	TRUE	TRUE	3
Q96CX2	KCTD12 BTB/POZ domain-containing protein KCTD12	KCTD12	2.7	2.69	2.64	4.02	0.58	0.1	TRUE	TRUE	TRUE	3
O75400	PRPF40A Pre-mRNA-processing factor 40 homolog A	PRPF40A	3.51	2.55	2.64	4.58	1.57	1.45	TRUE	TRUE	TRUE	3
P38606	ATP6V1A V-type proton ATPase catalytic subunit A	ATP6V1A	2.84	2.43	2.64	0.84	0.43	2.89	TRUE	TRUE	TRUE	3
P14618	PKM Pyruvate kinase isozymes M1/M2	PKM	3.16	2.57	2.63	2.14	0.57	1.73	TRUE	TRUE	TRUE	3
P14625	HSP90B1 Endoplasmin	HSP90B1	3.07	2.56	2.63	1.01	1.93	0.44	TRUE	TRUE	TRUE	3
P08238	HSP90AB1 Heat shock protein HSP 90-beta	HSP90AB1	2.91	2.4	2.63	1.88	1.87	0.9	TRUE	TRUE	TRUE	3
Q9H4M9	EHD1 EH domain-containing protein 1	EHD1	2.76	2.37	2.63	1.97	1.8	0.63	TRUE	TRUE	TRUE	3
O95197	RTN3 Reticulon-3	RTN3	2.42	2.25	2.63	6.16	0	0.01	TRUE	TRUE	TRUE	3
Q9Y4E1	FAM21C WASH complex subunit FAM21C	FAM21C	2.79	2.2	2.63	0.33	0	0	TRUE	TRUE	TRUE	3
P47755	CAPZA2 F-actin-capping protein subunit alpha-2	CAPZA2	4.83	4.5	2.62	3.59	4.05	1.79	TRUE	TRUE	TRUE	3
O00303	EIF3F Eukaryotic translation initiation factor 3 subunit	EIF3F	2.75	3.1	2.62	0.18	0.63	4.92	TRUE	TRUE	TRUE	3
Q99543	DNAJC2 DnaJ homolog subfamily C member 2	DNAJC2	3.26	2.8	2.62	0.88	5.03	0.5	TRUE	TRUE	TRUE	3
Q15084	PDIA6 Protein disulfide-isomerase A6	PDIA6	3.7	2.78	2.62	2.9	2.63	0.81	TRUE	TRUE	TRUE	3
P52895	AKR1C2 Aldo-keto reductase family 1 member C2	AKR1C2	3.21	2.64	2.62	1	0.65	0.52	TRUE	TRUE	TRUE	3
O43390	HNRNPR Heterogeneous nuclear ribonucleoprotein R	HNRNPR	2.68	2.41	2.62	0.97	0.52	2.63	TRUE	TRUE	TRUE	3
P13929	ENO3 Beta-enolase	ENO3	3.34	2.38	2.62	1.37	0.66	0.36	TRUE	TRUE	TRUE	3
Q06323	PSME1 Proteasome activator complex subunit 1	PSME1	2.9	3.5	2.61	3.83	1.88	0.82	TRUE	TRUE	TRUE	3
P18669	PGAM1 Phosphoglycerate mutase 1	PGAM1	2.68	2.54	2.61	1	2.7	0.46	TRUE	TRUE	TRUE	3
P06733	ENO1 Alpha-enolase	ENO1	2.89	2.53	2.61	2.1	0.5	0.86	TRUE	TRUE	TRUE	3
P61081	UBE2M NEDD8-conjugating enzyme Ubc12	UBE2M	5.23	2.37	2.61	4.18	1.47	1.34	TRUE	TRUE	TRUE	3
Q5SSJ5	HP1BP3 Heterochromatin protein 1-binding protein 3	HP1BP3	2.83	2.29	2.61	2.26	1.6	0.43	TRUE	TRUE	TRUE	3
Q13428	TCOF1 Treacle protein	TCOF1	3.54	2.19	2.61	1.89	0.59	0.77	TRUE	TRUE	TRUE	3
Q8IVS2	MCAT Malonyl-CoA-acyl carrier protein transacylase, mit	MCAT	2.77	2	2.61	0.16	0.57	0	TRUE	TRUE	TRUE	3
Q14914	PTGR1 Prostaglandin reductase 1	PTGR1	2.87	3.05	2.6	4.77	4.05	0.62	TRUE	TRUE	TRUE	3
P41223	BUD31 Protein BUD31 homolog	BUD31	3.59	2.8	2.6	0.64	0.62	0.34	TRUE	TRUE	TRUE	3
P07339	CTSD Cathepsin D	CTSD	3.22	2.71	2.6	4.31	0.69	0.27	TRUE	TRUE	TRUE	3
P26440	IVD Isovaleryl-CoA dehydrogenase, mitochondrial	IVD	3.36	2.69	2.6	2.5	1.28	0.33	TRUE	TRUE	TRUE	3
Q53FA3	HSPA1L Heat shock 70kDa protein 1-like variant	HSPA1L	3.12	2.63	2.59	1.29	0.59	0.49	TRUE	TRUE	TRUE	3
O15381	NVL Nuclear valosin-containing protein-like	NVL	2.04	2.17	2.59	0	0.06	0	TRUE	TRUE	TRUE	3
Q08257	CRYZ Quinone oxidoreductase	CRYZ	2.91	2.13	2.59	4.56	0.54	0.34	TRUE	TRUE	TRUE	3
O94906	PRPF6 Pre-mRNA-processing factor 6	PRPF6	2.44	2.09	2.59	1.32	3.62	4.12	TRUE	TRUE	TRUE	3
O14777	NDC80 Kinetochore protein NDC80 homolog	NDC80	5.5	3.25	2.58	4.33	1.52	0.82	TRUE	TRUE	TRUE	3
Q99426	TBCB Tubulin-folding cofactor B	TBCB	3.44	2.88	2.58	0.76	0.8	0.59	TRUE	TRUE	TRUE	3
O43395	PRPF3 U4/U6 small nuclear ribonucleoprotein Prp3	PRPF3	2.81	2.66	2.58	3.98	5.42	0.34	TRUE	TRUE	TRUE	3
P61106	RAB14 Ras-related protein Rab-14	RAB14	2.5	2.6	2.58	0.98	2.27	4.45	TRUE	TRUE	TRUE	3
P49368	CCT3 T-complex protein 1 subunit gamma	CCT3	3.04	2.52	2.58	2.63	2.34	2.26	TRUE	TRUE	TRUE	3
O43396	TXNL1 Thioredoxin-like protein 1	TXNL1	3	2.49	2.58	4.27	0.23	0.87	TRUE	TRUE	TRUE	3
P55884	EIF3B Eukaryotic translation initiation factor 3 subunit	EIF3B	2.88	2.3	2.58	2.47	0.66	0.84	TRUE	TRUE	TRUE	3
O15042	U2SURP U2 snRNP-associated SURP motif-containing protein	U2SURP	2.5	2.16	2.58	5.13	0.83	0.4	TRUE	TRUE	TRUE	3
P43686	PSMC4 26S protease regulatory subunit 6B	PSMC4	2.69	2.15	2.58	0.69	0.77	0.19	TRUE	TRUE	TRUE	3
Q16576	RBBP7 Histone-binding protein RBBP7	RBBP7	2.29	2.08	2.58	0.87	0.63	1.05	TRUE	TRUE	TRUE	3
Q9UBQ0	VPS29 Vacuolar protein sorting-associated protein 29	VPS29	3.45	2.04	2.58	5.21	0.46	0.66	TRUE	TRUE	TRUE	3
Q9UQ13	SHOC2 Leucine-rich repeat protein SHOC-2	SHOC2	2.95	8.38	2.57	0.43	9.36	0	TRUE	TRUE	TRUE	3
Q13409	DYNC1I2 Cytoplasmic dynein 1 intermediate chain 2	DYNC1I2	5.68	3.19	2.57	2.12	0.73	0	TRUE	TRUE	TRUE	3
P49720	PSMB3 Proteasome subunit beta type-3	PSMB3	3.53	3.06	2.57	0.73	0.21	1	TRUE	TRUE	TRUE	3
P60709	ACTB Actin, cytoplasmic 1	ACTB	2.96	2.6	2.57	1.23	0.5	0.91	TRUE	TRUE	TRUE	3
Q9Y5K5	UCHL5 Ubiquitin carboxyl-terminal hydrolase isozyme L5	UCHL5	2.99	2.23	2.57	1.13	0.75	1.53	TRUE	TRUE	TRUE	3
P08237	PFKM 6-phosphofructokinase, muscle type	PFKM	3.23	2.19	2.57	0.89	0.6	3.65	TRUE	TRUE	TRUE	3
P62266	RPS23 40S ribosomal protein S23	RPS23	2.4	2.04	2.57	0.52	0.73	0.63	TRUE	TRUE	TRUE	3
Q13907	IDI1 Isopentenyl-diphosphate Delta-isomerase 1	IDI1	2.48	2	2.57	0.65	0.82	4.76	TRUE	TRUE	TRUE	3
Q13162	PRDX4 Peroxiredoxin-4	PRDX4	3.37	3.03	2.56	0.51	0.93	0.49	TRUE	TRUE	TRUE	3
Q9UL46	PSME2 Proteasome activator complex subunit 2	PSME2	2.82	3.01	2.56	0.53	0.45	0.19	TRUE	TRUE	TRUE	3
Q969H8	C19orf10 UPF0556 protein C19orf10	C19orf10	2.98	2.98	2.56	0.37	0.57	0.34	TRUE	TRUE	TRUE	3
P0CW22	RPS17L 40S ribosomal protein S17-like	RPS17L	2.84	2.92	2.56	0.81	0.32	0.63	TRUE	TRUE	TRUE	3
P08107	HSPA1B Heat shock 70 kDa protein 1A/1B	HSPA1B	3.12	2.71	2.56	1.41	0.54	2.05	TRUE	TRUE	TRUE	3
P35268	RPL22 60S ribosomal protein L22	RPL22	2.79	2.61	2.56	1.43	0.45	0.17	TRUE	TRUE	TRUE	3
P13861	PRKAR2A cAMP-dependent protein kinase type II-alpha regula	PRKAR2A	2.53	2.53	2.56	0.4	0.45	0.27	TRUE	TRUE	TRUE	3
Q92688	ANP32B Acidic leucine-rich nuclear phosphoprotein 32 fami	ANP32B	3.07	2.52	2.56	0.48	5.19	4.75	TRUE	TRUE	TRUE	3
P14314	PRKCSH Glucosidase 2 subunit beta	PRKCSH	2.69	2.5	2.56	1.18	0.31	0.74	TRUE	TRUE	TRUE	3
Q92979	EMG1 Ribosomal RNA small subunit methyltransferase NEP1	EMG1	2.74	2.85	2.55	0.22	0.23	0.41	TRUE	TRUE	TRUE	3
Q8N1G4	LRRC47 Leucine-rich repeat-containing protein 47	LRRC47	3.07	2.6	2.55	0.75	0.7	0.67	TRUE	TRUE	TRUE	3
P08758	ANXA5 Annexin A5	ANXA5	2.85	2.59	2.55	1.81	2.71	3.11	TRUE	TRUE	TRUE	3
P52272	HNRNPM Heterogeneous nuclear ribonucleoprotein M	HNRNPM	3.11	2.45	2.55	2.18	2.22	3.75	TRUE	TRUE	TRUE	3
P31947	SFN 14-3-3 protein sigma	SFN	3.84	2.43	2.55	1.03	4.05	1.04	TRUE	TRUE	TRUE	3
P15170	GSPT1 Eukaryotic peptide chain release factor GTP-bindin	GSPT1	2.71	2.39	2.55	0.43	1.41	0.64	TRUE	TRUE	TRUE	3
O75534	CSDE1 Cold shock domain-containing protein E1	CSDE1	3	2.38	2.55	0.98	0.61	0.96	TRUE	TRUE	TRUE	3
P23921	RRM1 Ribonucleoside-diphosphate reductase large subunit	RRM1	2.93	2.32	2.55	3.67	0.52	3.24	TRUE	TRUE	TRUE	3
P49756	RBM25 RNA-binding protein 25	RBM25	2.62	2.3	2.55	0.94	0.26	0.14	TRUE	TRUE	TRUE	3
P14923	JUP Junction plakoglobin	JUP	2.45	2.16	2.55	0.33	0.61	0.88	TRUE	TRUE	TRUE	3
P63167	DYNLL1 Dynein light chain 1, cytoplasmic	DYNLL1	2.69	3.33	2.54	1.04	1.68	0.06	TRUE	TRUE	TRUE	3
O60701	UGDH UDP-glucose 6-dehydrogenase	UGDH	2.88	2.98	2.54	0.75	0.74	2.31	TRUE	TRUE	TRUE	3
P50395	GDI2 Rab GDP dissociation inhibitor beta	GDI2	3.21	2.66	2.54	1.03	1.18	2.49	TRUE	TRUE	TRUE	3
P49721	PSMB2 Proteasome subunit beta type-2	PSMB2	2.17	2.6	2.54	0.12	0	2.98	TRUE	TRUE	TRUE	3
Q562R1	ACTBL2 Beta-actin-like protein 2	ACTBL2	3	2.52	2.54	1.04	0.36	0.77	TRUE	TRUE	TRUE	3
Q02750	MAP2K1 Dual specificity mitogen-activated protein kinase	MAP2K1	3.06	2.45	2.54	0.28	0.25	1.18	TRUE	TRUE	TRUE	3
P12081	HARS Histidine--tRNA ligase, cytoplasmic	HARS	2.6	2.44	2.54	0.62	2.72	2.98	TRUE	TRUE	TRUE	3
O00299	CLIC1 Chloride intracellular channel protein 1	CLIC1	3.04	2.23	2.54	1.69	2.6	0.91	TRUE	TRUE	TRUE	3
P53041	PPP5C Serine/threonine-protein phosphatase 5	PPP5C	3.74	2.17	2.54	1.01	0.62	4.73	TRUE	TRUE	TRUE	3
P16401	HIST1H1B Histone H1.5	HIST1H1B	3.05	2.8	2.53	1.36	0.84	0.87	TRUE	TRUE	TRUE	3
Q15428	SF3A2 Splicing factor 3A subunit 2	SF3A2	2.33	2.7	2.53	1.44	0.34	0	TRUE	TRUE	TRUE	3
Q92878	RAD50 DNA repair protein RAD50	RAD50	2.66	2.67	2.53	0.95	0.67	3.2	TRUE	TRUE	TRUE	3
Q32MZ4	LRRFIP1 Leucine-rich repeat flightless-interacting protein	LRRFIP1	4.06	2.37	2.53	0.34	0	0	TRUE	TRUE	TRUE	3
Q9UHX1	PUF60 Poly(U)-binding-splicing factor PUF60	PUF60	2.9	2.28	2.53	3.6	1.52	0.45	TRUE	TRUE	TRUE	3
P54652	HSPA2 Heat shock-related 70 kDa protein 2	HSPA2	2.68	2.27	2.53	1.54	0.44	0.41	TRUE	TRUE	TRUE	3
P22061	PCMT1 Protein-L-isoaspartate(D-aspartate) O-methyltransf	PCMT1	3.29	2.98	2.52	1.96	0.68	0.23	TRUE	TRUE	TRUE	3
P62269	RPS18 40S ribosomal protein S18	RPS18	2.79	2.75	2.52	0.04	1.42	5.7	TRUE	TRUE	TRUE	3
P62750	RPL23A 60S ribosomal protein L23a	RPL23A	2.32	2.46	2.52	0.48	0.59	0.31	TRUE	TRUE	TRUE	3
Q96RP9	GFM1 Elongation factor G, mitochondrial	GFM1	3.44	2.57	2.51	4.49	0.42	0.71	TRUE	TRUE	TRUE	3
Q96AY3	FKBP10 Peptidyl-prolyl cis-trans isomerase FKBP10	FKBP10	5.85	2.53	2.51	0	0.22	0.53	TRUE	TRUE	TRUE	3
P49748	ACADVL Very long-chain specific acyl-CoA dehydrogenase, m	ACADVL	3.11	2.37	2.51	0.51	1.77	0.7	TRUE	TRUE	TRUE	3
Q7RTV0	PHF5A PHD finger-like domain-containing protein 5A	PHF5A	3.34	8.79	2.5	0.42	8.79	0.66	TRUE	TRUE	TRUE	3
Q96QC0	PPP1R10 Serine/threonine-protein phosphatase 1 regulatory	PPP1R10	6.54	3.64	2.5	0	0.05	2.3	TRUE	TRUE	TRUE	3
Q99729	HNRNPAB Heterogeneous nuclear ribonucleoprotein A/B	HNRNPAB	2.48	2.81	2.5	0.65	0.44	0.53	TRUE	TRUE	TRUE	3
P36957	DLST Dihydrolipoyllysine-residue succinyltransferase co	DLST	3.35	2.62	2.5	0.32	0.33	0.6	TRUE	TRUE	TRUE	3
Q99798	ACO2 Aconitate hydratase, mitochondrial	ACO2	2.85	2.58	2.5	0.88	0.68	0.38	TRUE	TRUE	TRUE	3
Q15185	PTGES3 Prostaglandin E synthase 3	PTGES3	2.37	2.47	2.5	0.35	0.69	0.15	TRUE	TRUE	TRUE	3
Q13464	ROCK1 Rho-associated protein kinase 1	ROCK1	2.07	2.46	2.5	6.56	0.65	0.5	TRUE	TRUE	TRUE	3
Q9H0P0	NT5C3 Cytosolic 5-nucleotidase 3	NT5C3	2.94	2.43	2.5	0	0	0	TRUE	TRUE	TRUE	3
P52565	ARHGDIA Rho GDP-dissociation inhibitor 1	ARHGDIA	3.3	2.41	2.5	1.16	0.72	0.28	TRUE	TRUE	TRUE	3
P40227	CCT6A T-complex protein 1 subunit zeta	CCT6A	2.92	2.38	2.5	2.17	0.41	0.62	TRUE	TRUE	TRUE	3
P09651	HNRNPA1 Heterogeneous nuclear ribonucleoprotein A1	HNRNPA1	2.31	2.2	2.5	0.92	0.74	0.36	TRUE	TRUE	TRUE	3
Q99829	CPNE1 Copine-1	CPNE1	2.85	2.14	2.5	5.48	1.02	0.43	TRUE	TRUE	TRUE	3
P61160	ACTR2 Actin-related protein 2	ACTR2	2.93	2.06	2.5	3.03	0.44	0.49	TRUE	TRUE	TRUE	3
Q8WVC0	LEO1 RNA polymerase-associated protein LEO1	LEO1	3.04	3	2.49	0	0	0	TRUE	TRUE	TRUE	3
Q13011	ECH1 Delta(3,5)-Delta(2,4)-dienoyl-CoA isomerase, mitoc	ECH1	3.19	2.79	2.49	0.97	1.07	0.75	TRUE	TRUE	TRUE	3
P31689	DNAJA1 DnaJ homolog subfamily A member 1	DNAJA1	3.53	2.59	2.49	3.94	2.4	0.55	TRUE	TRUE	TRUE	3
P27816	MAP4 Microtubule-associated protein 4	MAP4	3.11	2.52	2.49	3.4	0.57	1.99	TRUE	TRUE	TRUE	3
P24752	ACAT1 Acetyl-CoA acetyltransferase, mitochondrial	ACAT1	3.37	2.46	2.49	4.37	0.74	0.52	TRUE	TRUE	TRUE	3
Q9NTJ3	SMC4 Structural maintenance of chromosomes protein 4	SMC4	2.93	2.43	2.49	1.05	0.75	2.31	TRUE	TRUE	TRUE	3
Q99733	NAP1L4 Nucleosome assembly protein 1-like 4	NAP1L4	3.44	2.42	2.49	0.39	3.84	0.59	TRUE	TRUE	TRUE	3
P38919	EIF4A3 Eukaryotic initiation factor 4A-III	EIF4A3	3.27	2.34	2.49	3.15	3.94	0.8	TRUE	TRUE	TRUE	3
O75083	WDR1 WD repeat-containing protein 1	WDR1	2.77	2.31	2.49	1.05	2.16	2.07	TRUE	TRUE	TRUE	3
O95340	PAPSS2 Bifunctional 3-phosphoadenosine 5-phosphosulfate	PAPSS2	3.14	3.87	2.48	0.52	2.55	2.03	TRUE	TRUE	TRUE	3
Q9UN37	VPS4A Vacuolar protein sorting-associated protein 4A	VPS4A	2.66	2.92	2.48	0	1.07	0	TRUE	TRUE	TRUE	3
P62140	PPP1CB Serine/threonine-protein phosphatase PP1-beta cata	PPP1CB	2.69	2.86	2.48	3.69	3.9	3.82	TRUE	TRUE	TRUE	3
P15559	NQO1 NAD(P)H dehydrogenase	NQO1	3.97	2.52	2.48	0.55	0.3	0.47	TRUE	TRUE	TRUE	3
P13797	PLS3 Plastin-3	PLS3	2.86	2.49	2.48	1.27	1.1	0.51	TRUE	TRUE	TRUE	3
Q13435	SF3B2 Splicing factor 3B subunit 2	SF3B2	2.99	2.47	2.48	2.12	0.58	3.61	TRUE	TRUE	TRUE	3
Q9Y5Y2	NUBP2 Cytosolic Fe-S cluster assembly factor NUBP2	NUBP2	2.09	2.47	2.48	0	0.83	0	TRUE	TRUE	TRUE	3
P07437	TUBB Tubulin beta chain	TUBB	2.79	2.41	2.48	2.19	0.58	0.67	TRUE	TRUE	TRUE	3
P07741	APRT Adenine phosphoribosyltransferase	APRT	2.46	2.36	2.48	0.58	3.34	0.7	TRUE	TRUE	TRUE	3
Q9NR45	NANS Sialic acid synthase	NANS	3.18	2.03	2.48	4.33	0.29	2.9	TRUE	TRUE	TRUE	3
Q9UBU9	NXF1 Nuclear RNA export factor 1	NXF1	2.08	2.02	2.48	0	0.39	0.6	TRUE	TRUE	TRUE	3
O94905	ERLIN2 Erlin-2	ERLIN2	3.05	15	2.47	1.5	0	0.19	TRUE	TRUE	TRUE	3
P31150	GDI1 Rab GDP dissociation inhibitor alpha	GDI1	3.23	2.91	2.47	2.97	0.89	1.18	TRUE	TRUE	TRUE	3
P10412	HIST1H1E Histone H1.4	HIST1H1E	2.36	2.71	2.47	1.52	0.57	1.09	TRUE	TRUE	TRUE	3
P16402	HIST1H1D Histone H1.3	HIST1H1D	2.36	2.71	2.47	1.52	0.57	1.09	TRUE	TRUE	TRUE	3
Q9BSH4	TACO1 Translational activator of cytochrome c oxidase 1	TACO1	3.82	2.62	2.47	0.47	0.15	0.61	TRUE	TRUE	TRUE	3
Q14240	EIF4A2 Eukaryotic initiation factor 4A-II	EIF4A2	2.79	2.61	2.47	1.65	0.53	0.7	TRUE	TRUE	TRUE	3
Q9UJX3	ANAPC7 Anaphase-promoting complex subunit 7	ANAPC7	3.25	2.6	2.47	1.15	0	0.61	TRUE	TRUE	TRUE	3
Q96EY1	DNAJA3 DnaJ homolog subfamily A member 3, mitochondrial	DNAJA3	3.56	2.58	2.47	1.15	0.14	0.43	TRUE	TRUE	TRUE	3
P22102	GART Trifunctional purine biosynthetic protein adenosin	GART	2.96	2.52	2.47	3.57	2.28	0.63	TRUE	TRUE	TRUE	3
P35613	BSG Basigin	BSG	3.41	2.46	2.47	1.08	4.07	0.41	TRUE	TRUE	TRUE	3
Q15003	NCAPH Condensin complex subunit 2	NCAPH	2.79	2.4	2.47	1.39	4.08	0.38	TRUE	TRUE	TRUE	3
P18754	RCC1 Regulator of chromosome condensation	RCC1	3	2.38	2.47	0.74	0.31	0.58	TRUE	TRUE	TRUE	3
O95394	PGM3 Phosphoacetylglucosamine mutase	PGM3	2.45	2.31	2.47	4.26	0.42	0.12	TRUE	TRUE	TRUE	3
Q99832	CCT7 T-complex protein 1 subunit eta	CCT7	2.93	2.29	2.47	2.08	1.95	0.69	TRUE	TRUE	TRUE	3
Q9Y4W6	AFG3L2 AFG3-like protein 2	AFG3L2	3	2.27	2.47	0	0.11	0	TRUE	TRUE	TRUE	3
Q14103	HNRNPD Heterogeneous nuclear ribonucleoprotein D0	HNRNPD	2.74	2.24	2.47	1.32	3.2	0.55	TRUE	TRUE	TRUE	3
P62736	ACTA2 Actin, aortic smooth muscle	ACTA2	2.84	2.44	2.46	1.45	0.41	0.88	TRUE	TRUE	TRUE	3
P04406	GAPDH Glyceraldehyde-3-phosphate dehydrogenase	GAPDH	3	2.43	2.46	2.67	1.73	1.19	TRUE	TRUE	TRUE	3
P11142	HSPA8 Heat shock cognate 71 kDa protein	HSPA8	2.78	2.39	2.46	1.99	1.5	2.28	TRUE	TRUE	TRUE	3
P07910	HNRNPC Heterogeneous nuclear ribonucleoproteins C1/C2	HNRNPC	3.33	2.27	2.46	1.62	0.77	1.81	TRUE	TRUE	TRUE	3
Q93052	LPP Lipoma-preferred partner	LPP	5.95	2.08	2.46	5.54	0.66	0.61	TRUE	TRUE	TRUE	3
P14868	DARS Aspartate--tRNA ligase, cytoplasmic	DARS	3.16	2.57	2.45	0.73	3.18	0.53	TRUE	TRUE	TRUE	3
P34932	HSPA4 Heat shock 70 kDa protein 4	HSPA4	3.13	2.46	2.45	2.87	2.8	0.85	TRUE	TRUE	TRUE	3
Q14651	PLS1 Plastin-1	PLS1	2.71	2.44	2.45	0.11	0.1	0.25	TRUE	TRUE	TRUE	3
P42330	AKR1C3 Aldo-keto reductase family 1 member C3	AKR1C3	2.89	2.4	2.45	0.84	0.49	0.32	TRUE	TRUE	TRUE	3
Q9UBE0	SAE1 SUMO-activating enzyme subunit 1	SAE1	3.35	2.34	2.45	1.5	0.73	3.08	TRUE	TRUE	TRUE	3
P07900	HSP90AA1 Heat shock protein HSP 90-alpha	HSP90AA1	2.72	2.26	2.45	1.64	0.47	2.66	TRUE	TRUE	TRUE	3
P61764	STXBP1 Syntaxin-binding protein 1	STXBP1	2.2	2.06	2.45	0.73	4.58	0.41	TRUE	TRUE	TRUE	3
Q9BYD6	MRPL1 39S ribosomal protein L1, mitochondrial	MRPL1	10.28	6.56	2.44	6.68	0	0	TRUE	TRUE	TRUE	3
Q9Y450	HBS1L HBS1-like protein	HBS1L	3.39	3.26	2.44	4.76	5.05	0.62	TRUE	TRUE	TRUE	3
P18858	LIG1 DNA ligase 1	LIG1	15	3.01	2.44	6.39	1.97	0.36	TRUE	TRUE	TRUE	3
Q9NTZ6	RBM12 RNA-binding protein 12	RBM12	2.58	2.82	2.44	1.16	0.6	0.49	TRUE	TRUE	TRUE	3
P42166	TMPO Lamina-associated polypeptide 2, isoform alpha	TMPO	3.02	2.74	2.44	3.68	0.45	0.89	TRUE	TRUE	TRUE	3
Q9BVA1	TUBB2B Tubulin beta-2B chain	TUBB2B	2.88	2.41	2.44	2.43	2.4	0.54	TRUE	TRUE	TRUE	3
P68371	TUBB4B Tubulin beta-4B chain	TUBB4B	2.85	2.41	2.44	2.88	1.98	0.58	TRUE	TRUE	TRUE	3
Q14203	DCTN1 Dynactin subunit 1	DCTN1	2.74	2.24	2.44	3.34	0.75	0.5	TRUE	TRUE	TRUE	3
Q9UK61	FAM208A Protein FAM208A	FAM208A	3.19	2	2.44	5.45	0.92	1.41	TRUE	TRUE	TRUE	3
P39687	ANP32A Acidic leucine-rich nuclear phosphoprotein 32 fami	ANP32A	3.65	5.68	2.43	0.16	0	0.27	TRUE	TRUE	TRUE	3
P05198	EIF2S1 Eukaryotic translation initiation factor 2 subunit	EIF2S1	3.22	2.77	2.43	1.02	0.62	0.36	TRUE	TRUE	TRUE	3
P09104	ENO2 Gamma-enolase	ENO2	4.66	2.52	2.43	2.14	0.43	0.58	TRUE	TRUE	TRUE	3
Q13310	PABPC4 Polyadenylate-binding protein 4	PABPC4	3.08	2.48	2.43	0.69	0.41	2.04	TRUE	TRUE	TRUE	3
P68133	ACTA1 Actin, alpha skeletal muscle	ACTA1	2.84	2.48	2.43	1.49	0.43	0.9	TRUE	TRUE	TRUE	3
Q13509	TUBB3 Tubulin beta-3 chain	TUBB3	2.85	2.29	2.43	1.08	0.39	0.77	TRUE	TRUE	TRUE	3
Q9NW82	WDR70 WD repeat-containing protein 70	WDR70	4.14	2.62	2.42	0	4.19	0.84	TRUE	TRUE	TRUE	3
Q9H4G0	EPB41L1 Band 4.1-like protein 1	EPB41L1	2.91	2.56	2.42	5.4	0.55	3.29	TRUE	TRUE	TRUE	3
O75475	PSIP1 PC4 and SFRS1-interacting protein	PSIP1	3.48	2.55	2.42	1.59	0.8	6.45	TRUE	TRUE	TRUE	3
Q07065	CKAP4 Cytoskeleton-associated protein 4	CKAP4	3.06	2.5	2.42	0.29	0.39	6.57	TRUE	TRUE	TRUE	3
O75616	ERAL1 GTPase Era, mitochondrial	ERAL1	2.64	2.41	2.42	0.83	0.45	0	TRUE	TRUE	TRUE	3
O60488	ACSL4 Long-chain-fatty-acid--CoA ligase 4	ACSL4	2.57	2.29	2.42	1.45	3.76	1.43	TRUE	TRUE	TRUE	3
P07737	PFN1 Profilin-1	PFN1	2.5	2.27	2.42	0.52	0.19	0.58	TRUE	TRUE	TRUE	3
Q9BUF5	TUBB6 Tubulin beta-6 chain	TUBB6	2.34	2.26	2.42	0.94	0.43	0.69	TRUE	TRUE	TRUE	3
Q96GQ7	DDX27 Probable ATP-dependent RNA helicase DDX27	DDX27	2.75	2.21	2.42	5.62	0.62	0.03	TRUE	TRUE	TRUE	3
A6NHR9	SMCHD1 Structural maintenance of chromosomes flexible hin	SMCHD1	8.57	2.18	2.42	9.09	0	1.01	TRUE	TRUE	TRUE	3
Q08945	SSRP1 FACT complex subunit SSRP1	SSRP1	3.09	2.87	2.41	0.92	0.91	0.47	TRUE	TRUE	TRUE	3
P32322	PYCR1 Pyrroline-5-carboxylate reductase 1, mitochondrial	PYCR1	3.32	2.75	2.41	1.05	0.55	0.45	TRUE	TRUE	TRUE	3
P11940	PABPC1 Polyadenylate-binding protein 1	PABPC1	3.12	2.59	2.41	2.62	0.53	1.27	TRUE	TRUE	TRUE	3
P55263	ADK Adenosine kinase	ADK	3.12	2.41	2.41	0.42	1.08	0.68	TRUE	TRUE	TRUE	3
O14964	HGS Hepatocyte growth factor-regulated tyrosine kinase	HGS	2.46	2.41	2.41	0.63	0	0.14	TRUE	TRUE	TRUE	3
P04062	GBA Glucosylceramidase	GBA	3.25	2.36	2.41	6.96	2.63	4.9	TRUE	TRUE	TRUE	3
Q9Y3F4	STRAP Serine-threonine kinase receptor-associated protei	STRAP	2.71	2.33	2.41	0.57	0.45	0.54	TRUE	TRUE	TRUE	3
P46783	RPS10 40S ribosomal protein S10	RPS10	2.54	2.27	2.41	0.52	0.4	0.57	TRUE	TRUE	TRUE	3
Q9Y3I0	C22orf28 tRNA-splicing ligase RtcB homolog	C22orf28	3.17	2.21	2.41	0.74	2.2	1.02	TRUE	TRUE	TRUE	3
P49790	NUP153 Nuclear pore complex protein Nup153	NUP153	2.73	15	2.4	5.72	6.96	0.74	TRUE	TRUE	TRUE	3
P60842	EIF4A1 Eukaryotic initiation factor 4A-I	EIF4A1	2.77	2.73	2.4	2.16	0.58	0.69	TRUE	TRUE	TRUE	3
Q8TAT6	NPLOC4 Nuclear protein localization protein 4 homolog	NPLOC4	2.42	2.34	2.4	0.49	0.73	0.9	TRUE	TRUE	TRUE	3
Q12931	TRAP1 Heat shock protein 75 kDa, mitochondrial	TRAP1	2.75	2.33	2.4	1.13	0.46	1.24	TRUE	TRUE	TRUE	3
P36776	LONP1 Lon protease homolog, mitochondrial	LONP1	2.92	2.29	2.4	1.14	1.48	0.55	TRUE	TRUE	TRUE	3
Q7KZF4	SND1 Staphylococcal nuclease domain-containing protein	SND1	2.98	2.28	2.4	1.23	1.02	2.21	TRUE	TRUE	TRUE	3
Q96G03	PGM2 Phosphoglucomutase-2	PGM2	2.56	2.17	2.4	5.07	0.11	0.87	TRUE	TRUE	TRUE	3
Q7Z2Z2	EFTUD1 Elongation factor Tu GTP-binding domain-containing	EFTUD1	4.88	2.09	2.4	4.34	0	0	TRUE	TRUE	TRUE	3
P20839	IMPDH1 Inosine-5-monophosphate dehydrogenase 1	IMPDH1	2.82	2	2.4	1.08	0.41	0.7	TRUE	TRUE	TRUE	3
P10599	TXN Thioredoxin	TXN	3.42	2.65	2.39	0.52	0.34	0.84	TRUE	TRUE	TRUE	3
Q13642	FHL1 Four and a half LIM domains protein 1	FHL1	2.86	2.23	2.39	4.52	0.24	0.7	TRUE	TRUE	TRUE	3
P09211	GSTP1 Glutathione S-transferase P	GSTP1	3.27	2.42	2.38	1.1	2.04	1.29	TRUE	TRUE	TRUE	3
P13073	COX4I1 Cytochrome c oxidase subunit 4 isoform 1, mitochon	COX4I1	2.59	2.4	2.38	0.27	0.06	0.1	TRUE	TRUE	TRUE	3
Q96I24	FUBP3 Far upstream element-binding protein 3	FUBP3	3.12	2.29	2.38	1.02	1.7	0.36	TRUE	TRUE	TRUE	3
P55265	ADAR Double-stranded RNA-specific adenosine deaminase	ADAR	3.27	2.28	2.38	3.36	0.9	0.89	TRUE	TRUE	TRUE	3
Q14116	IL18 Interleukin-18	IL18	2.13	2.24	2.38	0.24	0	0.47	TRUE	TRUE	TRUE	3
Q02218	OGDH 2-oxoglutarate dehydrogenase, mitochondrial	OGDH	2.89	2.08	2.38	2.84	0.64	3.3	TRUE	TRUE	TRUE	3
Q96T51	RUFY1 RUN and FYVE domain-containing protein 1	RUFY1	8.58	8.45	2.37	9.08	9.27	0.09	TRUE	TRUE	TRUE	3
Q03001	DST Dystonin	DST	2.67	4.42	2.37	0.52	5.47	5	TRUE	TRUE	TRUE	3
P46060	RANGAP1 Ran GTPase-activating protein 1	RANGAP1	2.96	2.96	2.37	1.54	5.64	0.61	TRUE	TRUE	TRUE	3
O60506	SYNCRIP Heterogeneous nuclear ribonucleoprotein Q	SYNCRIP	2.72	2.41	2.37	0.67	0.75	0.54	TRUE	TRUE	TRUE	3
P63151	PPP2R2A Serine/threonine-protein phosphatase 2A 55 kDa reg	PPP2R2A	3.39	2.4	2.37	2.9	0.35	0.45	TRUE	TRUE	TRUE	3
P48163	ME1 NADP-dependent malic enzyme	ME1	3.04	2.33	2.37	0.18	1.17	0.46	TRUE	TRUE	TRUE	3
Q07666	KHDRBS1 KH domain-containing, RNA-binding, signal transduc	KHDRBS1	2.69	2.25	2.37	4.41	0.39	0.69	TRUE	TRUE	TRUE	3
P04083	ANXA1 Annexin A1	ANXA1	2.4	2.25	2.37	0.65	0.31	0.89	TRUE	TRUE	TRUE	3
P08559	PDHA1 Pyruvate dehydrogenase E1 component subunit alpha,	PDHA1	2.44	2.23	2.37	3.04	2.72	2.61	TRUE	TRUE	TRUE	3
Q13148	TARDBP TAR DNA-binding protein 43	TARDBP	2.39	2.12	2.37	0.33	3.66	0.71	TRUE	TRUE	TRUE	3
P20339	RAB5A Ras-related protein Rab-5A	RAB5A	2.59	2.09	2.37	1.49	0.7	0	TRUE	TRUE	TRUE	3
Q5T8P6	RBM26 RNA-binding protein 26	RBM26	3.66	2.99	2.36	5.55	0	7.31	TRUE	TRUE	TRUE	3
P43243	MATR3 Matrin-3	MATR3	2.96	2.33	2.36	2.94	0.78	0.61	TRUE	TRUE	TRUE	3
P34897	SHMT2 Serine hydroxymethyltransferase, mitochondrial	SHMT2	2.92	2.28	2.36	1.66	0.51	0.31	TRUE	TRUE	TRUE	3
Q96T37	RBM15 Putative RNA-binding protein 15	RBM15	2.86	10.23	2.35	0.36	0	0.15	TRUE	TRUE	TRUE	3
P30520	ADSS Adenylosuccinate synthetase isozyme 2	ADSS	2.61	2.37	2.35	0.92	0.93	0.66	TRUE	TRUE	TRUE	3
P15880	RPS2 40S ribosomal protein S2	RPS2	2.78	2.29	2.35	0.71	3.69	2.8	TRUE	TRUE	TRUE	3
Q9Y2R9	MRPS7 28S ribosomal protein S7, mitochondrial	MRPS7	2.41	2.28	2.35	0.44	0	3.44	TRUE	TRUE	TRUE	3
P10768	ESD S-formylglutathione hydrolase	ESD	2.49	2.19	2.35	0.63	0.48	0.62	TRUE	TRUE	TRUE	3
O43491	EPB41L2 Band 4.1-like protein 2	EPB41L2	2.75	2.14	2.35	0.64	0.3	0.38	TRUE	TRUE	TRUE	3
P55036	PSMD4 26S proteasome non-ATPase regulatory subunit 4	PSMD4	2.47	2.11	2.35	0.61	0.23	0.7	TRUE	TRUE	TRUE	3
P49419	ALDH7A1 Alpha-aminoadipic semialdehyde dehydrogenase	ALDH7A1	2.93	2.01	2.35	0.84	3.18	0.31	TRUE	TRUE	TRUE	3
Q16181	SEPT7 Septin-7	2017-09-07	2.55	2.01	2.35	0.93	0.28	0.62	TRUE	TRUE	TRUE	3
P13928	ANXA8 Annexin A8	ANXA8	2.45	3.16	2.34	0.66	0	0.16	TRUE	TRUE	TRUE	3
P78344	EIF4G2 Eukaryotic translation initiation factor 4 gamma 2	EIF4G2	2.94	2.62	2.34	1.5	0.89	3.24	TRUE	TRUE	TRUE	3
Q9UEW8	STK39 STE20/SPS1-related proline-alanine-rich protein ki	STK39	4.74	2.5	2.34	4.67	0.5	0.29	TRUE	TRUE	TRUE	3
P62263	RPS14 40S ribosomal protein S14	RPS14	2.73	2.44	2.34	1.11	0.38	3.39	TRUE	TRUE	TRUE	3
P07237	P4HB Protein disulfide-isomerase	P4HB	2.89	2.43	2.34	1.38	1.32	0.84	TRUE	TRUE	TRUE	3
P55809	OXCT1 Succinyl-CoA:3-ketoacid coenzyme A transferase 1,	OXCT1	2.89	2.38	2.34	1.41	0.42	2.33	TRUE	TRUE	TRUE	3
P12268	IMPDH2 Inosine-5-monophosphate dehydrogenase 2	IMPDH2	2.63	2.38	2.34	0.56	0.77	0.92	TRUE	TRUE	TRUE	3
Q9Y490	TLN1 Talin-1	TLN1	2.97	2.28	2.34	1.85	1.2	1.45	TRUE	TRUE	TRUE	3
P23246	SFPQ Splicing factor, proline- and glutamine-rich	SFPQ	2.73	2.23	2.34	3.17	0.46	5.4	TRUE	TRUE	TRUE	3
P49591	SARS Serine--tRNA ligase, cytoplasmic	SARS	2.68	2.19	2.34	1.23	0.65	0.25	TRUE	TRUE	TRUE	3
Q9NR30	DDX21 Nucleolar RNA helicase 2	DDX21	2.8	2.16	2.34	2.75	1.08	2.43	TRUE	TRUE	TRUE	3
Q14376	GALE UDP-glucose 4-epimerase	GALE	3.43	2.12	2.34	1.02	0.44	0.3	TRUE	TRUE	TRUE	3
Q15582	TGFBI Transforming growth factor-beta-induced protein ig	TGFBI	3.43	15	2.33	0.97	0	0.05	TRUE	TRUE	TRUE	3
P98175	RBM10 RNA-binding protein 10	RBM10	3.58	7.7	2.33	1.63	0	0.39	TRUE	TRUE	TRUE	3
Q9NP81	SARS2 Serine--tRNA ligase, mitochondrial	SARS2	3	4.05	2.33	0	0	0.71	TRUE	TRUE	TRUE	3
Q969S3	ZNF622 Zinc finger protein 622	ZNF622	2.79	3.79	2.33	1.76	6	0.66	TRUE	TRUE	TRUE	3
Q9NW13	RBM28 RNA-binding protein 28	RBM28	2.05	2.36	2.33	1.09	0	0	TRUE	TRUE	TRUE	3
O43252	PAPSS1 Bifunctional 3-phosphoadenosine 5-phosphosulfate	PAPSS1	2.88	2.17	2.33	0.37	1.52	0.99	TRUE	TRUE	TRUE	3
O15460	P4HA2 Prolyl 4-hydroxylase subunit alpha-2	P4HA2	2.44	2.15	2.33	0.64	0.32	0.25	TRUE	TRUE	TRUE	3
P51610	HCFC1 Host cell factor 1	HCFC1	2.61	2.14	2.33	1.21	0.75	1.99	TRUE	TRUE	TRUE	3
Q9H307	PNN Pinin	PNN	2.85	2.42	2.32	0	0	0.04	TRUE	TRUE	TRUE	3
P36871	PGM1 Phosphoglucomutase-1	PGM1	2.43	2.3	2.32	0.78	0.46	0.31	TRUE	TRUE	TRUE	3
P08670	VIM Vimentin	VIM	2.96	2.15	2.32	1.22	0.43	3.41	TRUE	TRUE	TRUE	3
P26196	DDX6 Probable ATP-dependent RNA helicase DDX6	DDX6	2.79	2.02	2.32	5.06	1.98	1.93	TRUE	TRUE	TRUE	3
P82933	MRPS9 28S ribosomal protein S9, mitochondrial	MRPS9	3.18	2.88	2.31	0.52	0.57	0.44	TRUE	TRUE	TRUE	3
P37837	TALDO1 Transaldolase	TALDO1	3.02	2.47	2.31	0.82	0.64	0.4	TRUE	TRUE	TRUE	3
O95757	HSPA4L Heat shock 70 kDa protein 4L	HSPA4L	2.62	2.44	2.31	2.97	1.47	0.62	TRUE	TRUE	TRUE	3
Q99598	TSNAX Translin-associated protein X	TSNAX	2.68	2.25	2.31	0.9	1.18	0.29	TRUE	TRUE	TRUE	3
O14979	HNRPDL Heterogeneous nuclear ribonucleoprotein D-like	HNRPDL	3.39	2.23	2.31	5.76	0.42	0.35	TRUE	TRUE	TRUE	3
P05388	RPLP0 60S acidic ribosomal protein P0	RPLP0	3.13	2.23	2.31	0.97	0.46	0.82	TRUE	TRUE	TRUE	3
P49588	AARS Alanine--tRNA ligase, cytoplasmic	AARS	3.04	2.17	2.31	2.99	0.89	0.61	TRUE	TRUE	TRUE	3
P46782	RPS5 40S ribosomal protein S5	RPS5	2.74	2.12	2.31	0.57	0.5	0.49	TRUE	TRUE	TRUE	3
Q9UKK9	NUDT5 ADP-sugar pyrophosphatase	NUDT5	2.97	2.08	2.31	0	0.2	0.08	TRUE	TRUE	TRUE	3
I3L0E3	MRPS17 28S ribosomal protein S17, mitochondrial	MRPS17	2.31	8.7	2.3	0	8.92	0	TRUE	TRUE	TRUE	3
Q8WWY3	PRPF31 U4/U6 small nuclear ribonucleoprotein Prp31	PRPF31	3.68	3	2.3	0.4	0	0	TRUE	TRUE	TRUE	3
Q96A72	MAGOHB Protein mago nashi homolog 2	MAGOHB	2.99	2.68	2.3	6.05	6.29	6.47	TRUE	TRUE	TRUE	3
Q13630	TSTA3 GDP-L-fucose synthase	TSTA3	2.87	2.54	2.3	2.54	0.45	0.7	TRUE	TRUE	TRUE	3
Q9NV70	EXOC1 Exocyst complex component 1	EXOC1	2.33	2.23	2.3	0	0.18	0.59	TRUE	TRUE	TRUE	3
P06396	GSN Gelsolin	GSN	2.58	2.2	2.3	0.64	2.08	0.28	TRUE	TRUE	TRUE	3
O75436	VPS26A Vacuolar protein sorting-associated protein 26A	VPS26A	2.39	2.13	2.3	1.7	0.3	0.35	TRUE	TRUE	TRUE	3
Q9NSE4	IARS2 Isoleucine--tRNA ligase, mitochondrial	IARS2	2.52	2.05	2.3	3.83	0.57	0.76	TRUE	TRUE	TRUE	3
Q9NTK5	OLA1 Obg-like ATPase 1	OLA1	3.16	2.77	2.29	2.46	0.38	0.55	TRUE	TRUE	TRUE	3
Q6PJT7	ZC3H14 Zinc finger CCCH domain-containing protein 14	ZC3H14	2.78	2.77	2.29	1.75	0.2	2.1	TRUE	TRUE	TRUE	3
P11413	G6PD Glucose-6-phosphate 1-dehydrogenase	G6PD	3.05	2.54	2.29	3.03	2.67	0.52	TRUE	TRUE	TRUE	3
P07602	PSAP Proactivator polypeptide	PSAP	4.83	2.36	2.29	2.89	0.52	0.57	TRUE	TRUE	TRUE	3
O94979	SEC31A Protein transport protein Sec31A	SEC31A	2.88	2.35	2.29	1.03	1.02	1.13	TRUE	TRUE	TRUE	3
P62316	SNRPD2 Small nuclear ribonucleoprotein Sm D2	SNRPD2	2.06	2.34	2.29	0.44	0.21	0.53	TRUE	TRUE	TRUE	3
Q92841	DDX17 Probable ATP-dependent RNA helicase DDX17	DDX17	2.63	2.33	2.29	1.21	1.63	0.86	TRUE	TRUE	TRUE	3
O60610	DIAPH1 Protein diaphanous homolog 1	DIAPH1	2.67	2.29	2.29	1.05	4.09	2.01	TRUE	TRUE	TRUE	3
Q92905	COPS5 COP9 signalosome complex subunit 5	COPS5	2.34	2.21	2.29	1.55	0.81	0.64	TRUE	TRUE	TRUE	3
P25789	PSMA4 Proteasome subunit alpha type-4	PSMA4	3	2.17	2.29	0.94	3.86	0.71	TRUE	TRUE	TRUE	3
P62424	RPL7A 60S ribosomal protein L7a	RPL7A	2.21	2.17	2.29	0.49	3.17	0.7	TRUE	TRUE	TRUE	3
P30044	PRDX5 Peroxiredoxin-5, mitochondrial	PRDX5	3.18	2.05	2.29	0.36	0.41	0.35	TRUE	TRUE	TRUE	3
P33992	MCM5 DNA replication licensing factor MCM5	MCM5	2.64	2.02	2.29	2.44	0.51	3.73	TRUE	TRUE	TRUE	3
Q15819	UBE2V2 Ubiquitin-conjugating enzyme E2 variant 2	UBE2V2	2.62	2	2.29	0.64	0.95	0.91	TRUE	TRUE	TRUE	3
P30041	PRDX6 Peroxiredoxin-6	PRDX6	3.77	3.04	2.28	1.2	3.47	0.49	TRUE	TRUE	TRUE	3
P20618	PSMB1 Proteasome subunit beta type-1	PSMB1	2.79	2.67	2.28	0.54	1.09	0.38	TRUE	TRUE	TRUE	3
P40926	MDH2 Malate dehydrogenase, mitochondrial	MDH2	2.38	2.31	2.28	1.83	1.03	1.11	TRUE	TRUE	TRUE	3
Q71U36	TUBA1A Tubulin alpha-1A chain	TUBA1A	2.34	2	2.28	1.38	0.46	0.76	TRUE	TRUE	TRUE	3
P56545	CTBP2 C-terminal-binding protein 2	CTBP2	2.45	2.88	2.27	1.12	0.25	0.37	TRUE	TRUE	TRUE	3
Q16527	CSRP2 Cysteine and glycine-rich protein 2	CSRP2	3.11	2.81	2.27	0.06	0.14	1	TRUE	TRUE	TRUE	3
P49590	HARS2 Probable histidine--tRNA ligase, mitochondrial	HARS2	2.29	2.68	2.27	0.36	5.56	4.07	TRUE	TRUE	TRUE	3
P61019	RAB2A Ras-related protein Rab-2A	RAB2A	2.52	2.41	2.27	0.54	0.2	0.88	TRUE	TRUE	TRUE	3
Q9Y230	RUVBL2 RuvB-like 2	RUVBL2	3.57	2.4	2.27	0.82	0.67	0.25	TRUE	TRUE	TRUE	3
Q96TA1	FAM129B Niban-like protein 1	FAM129B	2.86	2.23	2.27	2.66	2.98	0.54	TRUE	TRUE	TRUE	3
Q9P258	RCC2 Protein RCC2	RCC2	2.81	2.23	2.27	0.69	3.2	0.58	TRUE	TRUE	TRUE	3
P43304	GPD2 Glycerol-3-phosphate dehydrogenase, mitochondrial	GPD2	2.02	2.18	2.27	0.39	0.19	6.37	TRUE	TRUE	TRUE	3
Q32P28	LEPRE1 Prolyl 3-hydroxylase 1	LEPRE1	3.94	2	2.27	1.69	0.42	0.5	TRUE	TRUE	TRUE	3
Q06124	PTPN11 Tyrosine-protein phosphatase non-receptor type 11	PTPN11	3.08	2.61	2.26	1.24	0.4	1.16	TRUE	TRUE	TRUE	3
P40925	MDH1 Malate dehydrogenase, cytoplasmic	MDH1	2.66	2.48	2.26	1.59	0.5	0.52	TRUE	TRUE	TRUE	3
Q52LJ0	FAM98B Protein FAM98B	FAM98B	3.17	2.35	2.26	1.47	0.31	0.61	TRUE	TRUE	TRUE	3
P62258	YWHAE 14-3-3 protein epsilon	YWHAE	3.36	2.31	2.26	1.54	0.57	0.71	TRUE	TRUE	TRUE	3
P51148	RAB5C Ras-related protein Rab-5C	RAB5C	2.48	2.17	2.26	1.06	1.78	0.17	TRUE	TRUE	TRUE	3
P00387	CYB5R3 NADH-cytochrome b5 reductase 3	CYB5R3	3.08	2.16	2.26	0.78	0.65	0.89	TRUE	TRUE	TRUE	3
P60174	TPI1 Triosephosphate isomerase	TPI1	2.81	2.13	2.26	2.45	0.34	0.76	TRUE	TRUE	TRUE	3
O75116	ROCK2 Rho-associated protein kinase 2	ROCK2	3.09	2.58	2.25	2.82	0.81	0.54	TRUE	TRUE	TRUE	3
Q01518	CAP1 Adenylyl cyclase-associated protein 1	CAP1	2.33	2.34	2.25	1.16	0.35	0.33	TRUE	TRUE	TRUE	3
P51665	PSMD7 26S proteasome non-ATPase regulatory subunit 7	PSMD7	3.08	2.29	2.25	0.39	2.61	0.95	TRUE	TRUE	TRUE	3
P28331	NDUFS1 NADH-ubiquinone oxidoreductase 75 kDa subunit, mit	NDUFS1	2.52	2.19	2.25	1.08	1.2	0.25	TRUE	TRUE	TRUE	3
Q9NZL9	MAT2B Methionine adenosyltransferase 2 subunit beta	MAT2B	2.58	2.11	2.25	0.08	0.23	0.51	TRUE	TRUE	TRUE	3
Q9NZN4	EHD2 EH domain-containing protein 2	EHD2	3.02	2.09	2.25	1.38	0.68	0.55	TRUE	TRUE	TRUE	3
Q15418	RPS6KA1 Ribosomal protein S6 kinase alpha-1	RPS6KA1	2.69	2.76	2.24	0.32	0	0.63	TRUE	TRUE	TRUE	3
P15531	NME1 Nucleoside diphosphate kinase A	NME1	2.55	2.54	2.24	2.81	2.83	3.46	TRUE	TRUE	TRUE	3
P00374	DHFR Dihydrofolate reductase	DHFR	2.9	2.47	2.24	1.81	0.53	0.42	TRUE	TRUE	TRUE	3
P61158	ACTR3 Actin-related protein 3	ACTR3	2.62	2.45	2.24	0.94	2.91	0.55	TRUE	TRUE	TRUE	3
Q6UXN9	WDR82 WD repeat-containing protein 82	WDR82	2.61	2.25	2.24	0.37	0.79	0.47	TRUE	TRUE	TRUE	3
Q5F1R6	DNAJC21 DnaJ homolog subfamily C member 21	DNAJC21	2.58	2.08	2.24	0.52	6.66	0.21	TRUE	TRUE	TRUE	3
O43684	BUB3 Mitotic checkpoint protein BUB3	BUB3	3.83	2.24	2.23	1.46	0.54	1.28	TRUE	TRUE	TRUE	3
P49915	GMPS GMP synthase	GMPS	2.9	2.19	2.23	0.98	0.35	0.97	TRUE	TRUE	TRUE	3
P62333	PSMC6 26S protease regulatory subunit 10B	PSMC6	2.78	2.12	2.23	4.08	0.44	0.34	TRUE	TRUE	TRUE	3
Q13838	DDX39B Spliceosome RNA helicase DDX39B	DDX39B	2.7	2.08	2.23	0.5	0.29	0.85	TRUE	TRUE	TRUE	3
Q5JRX3	PITRM1 Presequence protease, mitochondrial	PITRM1	3.01	2.07	2.23	3.6	0.34	0.71	TRUE	TRUE	TRUE	3
P30043	BLVRB Flavin reductase (NADPH)	BLVRB	2.81	2.25	2.22	0.36	0.11	0	TRUE	TRUE	TRUE	3
Q00839	HNRNPU Heterogeneous nuclear ribonucleoprotein U	HNRNPU	2.63	2.17	2.22	1.36	1.12	0.73	TRUE	TRUE	TRUE	3
P41091	EIF2S3 Eukaryotic translation initiation factor 2 subunit	EIF2S3	2.64	2.08	2.22	0.74	1.03	0.32	TRUE	TRUE	TRUE	3
Q8IX12	CCAR1 Cell division cycle and apoptosis regulator protei	CCAR1	3.96	3.62	2.21	3.4	6.97	0.81	TRUE	TRUE	TRUE	3
P09543	CNP 2,3-cyclic-nucleotide 3-phosphodiesterase	CNP	2.33	2.54	2.21	4.56	0.68	0.37	TRUE	TRUE	TRUE	3
Q13557	CAMK2D Calcium/calmodulin-dependent protein kinase type I	CAMK2D	2.54	2.29	2.21	4.52	6.53	3.57	TRUE	TRUE	TRUE	3
P32969	RPL9P9 60S ribosomal protein L9	RPL9P9	2.73	2.16	2.21	0.93	1.14	0.32	TRUE	TRUE	TRUE	3
P46821	MAP1B Microtubule-associated protein 1B	MAP1B	2.49	2.16	2.21	4.49	4.21	4.23	TRUE	TRUE	TRUE	3
Q8N392	ARHGAP18 Rho GTPase-activating protein 18	ARHGAP18	4.3	11.43	2.2	6.76	6.15	0.27	TRUE	TRUE	TRUE	3
O75821	EIF3G Eukaryotic translation initiation factor 3 subunit	EIF3G	3.42	2.76	2.2	1.6	6.05	0.76	TRUE	TRUE	TRUE	3
Q12792	TWF1 Twinfilin-1	TWF1	2.66	2.49	2.2	0.71	1.04	3.59	TRUE	TRUE	TRUE	3
Q9Y617	PSAT1 Phosphoserine aminotransferase	PSAT1	3.1	2.45	2.2	1.42	0.29	0.42	TRUE	TRUE	TRUE	3
P17931	LGALS3 Galectin-3	LGALS3	3.04	2.2	2.2	0	0.1	0.43	TRUE	TRUE	TRUE	3
P32119	PRDX2 Peroxiredoxin-2	PRDX2	2.59	2.16	2.2	0.64	0.42	0.74	TRUE	TRUE	TRUE	3
O15143	ARPC1B Actin-related protein 2/3 complex subunit 1B	ARPC1B	2.41	2.11	2.2	1.79	3.93	4.11	TRUE	TRUE	TRUE	3
O00764	PDXK Pyridoxal kinase	PDXK	2.3	2.06	2.2	4.48	0.42	0.38	TRUE	TRUE	TRUE	3
Q9H074	PAIP1 Polyadenylate-binding protein-interacting protein	PAIP1	2.3	2.02	2.2	0.69	0.23	0.68	TRUE	TRUE	TRUE	3
Q6UB35	MTHFD1L Monofunctional C1-tetrahydrofolate synthase, mitoc	MTHFD1L	2.77	2.31	2.19	1.59	0.27	1.03	TRUE	TRUE	TRUE	3
P35221	CTNNA1 Catenin alpha-1	CTNNA1	2.96	2.29	2.19	1.33	3.18	0.56	TRUE	TRUE	TRUE	3
O75746	SLC25A12 Calcium-binding mitochondrial carrier protein Aral	SLC25A12	2.91	2.08	2.19	0	0.83	0.58	TRUE	TRUE	TRUE	3
O60568	PLOD3 Procollagen-lysine,2-oxoglutarate 5-dioxygenase 3	PLOD3	2.57	2.08	2.19	0.57	0.29	0.45	TRUE	TRUE	TRUE	3
O43663	PRC1 Protein regulator of cytokinesis 1	PRC1	3.66	2.91	2.18	1.07	0.74	0	TRUE	TRUE	TRUE	3
P06132	UROD Uroporphyrinogen decarboxylase	UROD	3.62	2.5	2.18	0.54	0	0.23	TRUE	TRUE	TRUE	3
Q9Y570	PPME1 Protein phosphatase methylesterase 1	PPME1	2.9	2.5	2.18	0.54	1.66	0.15	TRUE	TRUE	TRUE	3
Q8NFW8	CMAS N-acylneuraminate cytidylyltransferase	CMAS	2.18	2.03	2.18	0.86	0	0.12	TRUE	TRUE	TRUE	3
O00267	SUPT5H Transcription elongation factor SPT5	SUPT5H	3.24	2.74	2.17	4.96	0.9	0.85	TRUE	TRUE	TRUE	3
Q9Y2L1	DIS3 Exosome complex exonuclease RRP44	DIS3	3.75	2.61	2.17	4.07	0.66	1.03	TRUE	TRUE	TRUE	3
P09874	PARP1 Poly	PARP1	2.82	2.38	2.17	0.74	2.15	0.47	TRUE	TRUE	TRUE	3
P45880	VDAC2 Voltage-dependent anion-selective channel protein	VDAC2	2.64	2.36	2.17	1.26	0.74	1.33	TRUE	TRUE	TRUE	3
Q8N543	OGFOD1 2-oxoglutarate and iron-dependent oxygenase domain	OGFOD1	3.87	2.13	2.17	1.43	0.34	0.37	TRUE	TRUE	TRUE	3
Q96CW1	AP2M1 AP-2 complex subunit mu	AP2M1	3.14	2.09	2.17	5.39	0.06	0.11	TRUE	TRUE	TRUE	3
P15121	AKR1B1 Aldose reductase	AKR1B1	2.41	2.08	2.17	0.66	0.31	0.31	TRUE	TRUE	TRUE	3
Q96JM3	CHAMP1 Chromosome alignment-maintaining phosphoprotein 1	CHAMP1	5.4	2.18	2.16	0	0.11	0	TRUE	TRUE	TRUE	3
P41240	CSK Tyrosine-protein kinase CSK	CSK	3.28	2.17	2.16	5.93	0.14	0	TRUE	TRUE	TRUE	3
P11586	MTHFD1 C-1-tetrahydrofolate synthase, cytoplasmic	MTHFD1	2.7	2.15	2.16	1.6	0.44	0.73	TRUE	TRUE	TRUE	3
P29144	TPP2 Tripeptidyl-peptidase 2	TPP2	2.71	2.04	2.16	0.5	0.26	4.11	TRUE	TRUE	TRUE	3
P55786	NPEPPS Puromycin-sensitive aminopeptidase	NPEPPS	2.46	2.02	2.16	0.82	0.37	0.62	TRUE	TRUE	TRUE	3
Q96PZ0	PUS7 Pseudouridylate synthase 7 homolog	PUS7	2.75	2.7	2.15	0.85	0.18	4.09	TRUE	TRUE	TRUE	3
P62753	RPS6 40S ribosomal protein S6	RPS6	2.79	2.43	2.15	1.33	0.37	0.28	TRUE	TRUE	TRUE	3
P61247	RPS3A 40S ribosomal protein S3a	RPS3A	2.97	2.17	2.15	1.05	0.34	1.03	TRUE	TRUE	TRUE	3
Q9BVP2	GNL3 Guanine nucleotide-binding protein-like 3	GNL3	3.04	2.08	2.15	0.99	0.53	4.88	TRUE	TRUE	TRUE	3
Q96GG9	DCUN1D1 DCN1-like protein 1	DCUN1D1	2.97	3.95	2.14	6.28	0	0.75	TRUE	TRUE	TRUE	3
Q69YN2	CWF19L1 CWF19-like protein 1	CWF19L1	8.58	2.44	2.14	9.08	0	0	TRUE	TRUE	TRUE	3
Q15654	TRIP6 Thyroid receptor-interacting protein 6	TRIP6	2.77	2	2.14	1.15	0.14	0.4	TRUE	TRUE	TRUE	3
Q8NE71	ABCF1 ATP-binding cassette sub-family F member 1	ABCF1	3.19	2.37	2.13	3.1	0.44	0.42	TRUE	TRUE	TRUE	3
Q92499	DDX1 ATP-dependent RNA helicase DDX1	DDX1	2.23	2.02	2.13	2.93	0.62	0.59	TRUE	TRUE	TRUE	3
Q8IWS0	PHF6 PHD finger protein 6	PHF6	4.37	2.56	2.12	4.99	0.78	0	TRUE	TRUE	TRUE	3
P30050	RPL12 60S ribosomal protein L12	RPL12	2.55	2.26	2.12	0.68	0.4	0.94	TRUE	TRUE	TRUE	3
Q9Y5M8	SRPRB Signal recognition particle receptor subunit beta	SRPRB	2.12	2.08	2.12	0.57	0.17	0.37	TRUE	TRUE	TRUE	3
Q14197	ICT1 Peptidyl-tRNA hydrolase ICT1, mitochondrial	ICT1	2.52	2.04	2.12	0.35	0.13	0.42	TRUE	TRUE	TRUE	3
Q14315	FLNC Filamin-C	FLNC	2.48	2.03	2.12	3.2	3.34	3.61	TRUE	TRUE	TRUE	3
P62280	RPS11 40S ribosomal protein S11	RPS11	2.74	2	2.12	1.13	0.35	0.31	TRUE	TRUE	TRUE	3
Q93009	USP7 Ubiquitin carboxyl-terminal hydrolase 7	USP7	2.85	2.54	2.11	0.41	0.26	3.3	TRUE	TRUE	TRUE	3
Q96H79	ZC3HAV1L Zinc finger CCCH-type antiviral protein 1-like	ZC3HAV1L	4.42	2.32	2.11	0	1.46	0	TRUE	TRUE	TRUE	3
O60841	EIF5B Eukaryotic translation initiation factor 5B	EIF5B	3.16	2.21	2.11	3.79	1.06	5.1	TRUE	TRUE	TRUE	3
P11172	UMPS Uridine 5-monophosphate synthase	UMPS	2.6	2.49	2.1	1.99	0.49	0.34	TRUE	TRUE	TRUE	3
P17844	DDX5 Probable ATP-dependent RNA helicase DDX5	DDX5	2.6	2.17	2.1	0.78	0.78	1.05	TRUE	TRUE	TRUE	3
P21281	ATP6V1B2 V-type proton ATPase subunit B, brain isoform	ATP6V1B2	2.54	2.16	2.1	0	0.28	0.4	TRUE	TRUE	TRUE	3
Q9UG63	ABCF2 ATP-binding cassette sub-family F member 2	ABCF2	2.7	2.12	2.1	3.49	1.27	0.51	TRUE	TRUE	TRUE	3
P20742	PZP Pregnancy zone protein	PZP	2.96	2.11	2.1	0.42	0.26	0.95	TRUE	TRUE	TRUE	3
P43121	MCAM Cell surface glycoprotein MUC18	MCAM	2.72	2	2.1	1.63	0.09	0.72	TRUE	TRUE	TRUE	3
O75369	FLNB Filamin-B	FLNB	2.38	2	2.1	2.16	1.23	1.92	TRUE	TRUE	TRUE	3
P35237	SERPINB6 Serpin B6	SERPINB6	2.33	2.58	2.09	1.56	0.55	0.31	TRUE	TRUE	TRUE	3
P78406	RAE1 mRNA export factor	RAE1	2.05	2.3	2.09	0	0	0.51	TRUE	TRUE	TRUE	3
O60826	CCDC22 Coiled-coil domain-containing protein 22	CCDC22	3.47	2.21	2.09	0.25	1.54	0.97	TRUE	TRUE	TRUE	3
O60566	BUB1B Mitotic checkpoint serine/threonine-protein kinase	BUB1B	2.44	2.17	2.09	6.37	0.33	0	TRUE	TRUE	TRUE	3
O43175	PHGDH D-3-phosphoglycerate dehydrogenase	PHGDH	2.84	2.09	2.09	2.78	0.36	0.4	TRUE	TRUE	TRUE	3
Q13813	SPTAN1 Spectrin alpha chain, non-erythrocytic 1	SPTAN1	2.54	2.08	2.09	1.13	0.66	0.58	TRUE	TRUE	TRUE	3
P36551	CPOX Coproporphyrinogen-III oxidase, mitochondrial	CPOX	15	2.05	2.09	0	0	0.04	TRUE	TRUE	TRUE	3
P35222	CTNNB1 Catenin beta-1	CTNNB1	5.81	2.04	2.09	5.41	0.32	0.48	TRUE	TRUE	TRUE	3
P49189	ALDH9A1 4-trimethylaminobutyraldehyde dehydrogenase	ALDH9A1	2.36	2.03	2.09	3	0.84	1.06	TRUE	TRUE	TRUE	3
P35998	PSMC2 26S protease regulatory subunit 7	PSMC2	2.65	2.02	2.09	0.96	3.24	0.62	TRUE	TRUE	TRUE	3
O75794	CDC123 Cell division cycle protein 123 homolog	CDC123	2.57	2.66	2.08	0	0.27	1.51	TRUE	TRUE	TRUE	3
Q13126	MTAP S-methyl-5-thioadenosine phosphorylase	MTAP	2.49	2.6	2.08	1.59	0.57	0.22	TRUE	TRUE	TRUE	3
P22234	PAICS Multifunctional protein ADE2	PAICS	2.79	2.41	2.08	0.96	0.41	0.4	TRUE	TRUE	TRUE	3
O95302	FKBP9 Peptidyl-prolyl cis-trans isomerase FKBP9	FKBP9	4.03	2.37	2.08	2.43	0.66	0.75	TRUE	TRUE	TRUE	3
P61513	RPL37A 60S ribosomal protein L37a	RPL37A	4.54	2.36	2.08	3.43	0	0.26	TRUE	TRUE	TRUE	3
Q00341	HDLBP Vigilin	HDLBP	3.12	2.25	2.08	1.39	2.23	0.52	TRUE	TRUE	TRUE	3
Q15046	KARS Lysine--tRNA ligase	KARS	3.01	2.21	2.08	2.88	1.15	0.96	TRUE	TRUE	TRUE	3
P55795	HNRNPH2 Heterogeneous nuclear ribonucleoprotein H2	HNRNPH2	2.46	2.2	2.08	1.12	0.64	0.7	TRUE	TRUE	TRUE	3
O15355	PPM1G Protein phosphatase 1G	PPM1G	2.29	2.2	2.08	0.36	0.34	0.39	TRUE	TRUE	TRUE	3
Q9BXP5	SRRT Serrate RNA effector molecule homolog	SRRT	2.85	2.19	2.08	5.56	0.68	0.71	TRUE	TRUE	TRUE	3
Q8N3R9	MPP5 MAGUK p55 subfamily member 5	MPP5	5.35	2.18	2.08	0	1.02	0	TRUE	TRUE	TRUE	3
Q9Y221	NIP7 60S ribosome subunit biogenesis protein NIP7 homol	NIP7	3.22	2.27	2.07	0	0	0	TRUE	TRUE	TRUE	3
Q8N6H7	ARFGAP2 ADP-ribosylation factor GTPase-activating protein	ARFGAP2	4.73	3.38	2.06	0	0.71	0	TRUE	TRUE	TRUE	3
Q15404	RSU1 Ras suppressor protein 1	RSU1	3.08	2.59	2.06	1.14	0.18	1.01	TRUE	TRUE	TRUE	3
Q01813	PFKP 6-phosphofructokinase type C	PFKP	2.72	2.12	2.06	0.69	1.2	2.86	TRUE	TRUE	TRUE	3
P32455	GBP1 Interferon-induced guanylate-binding protein 1	GBP1	2.87	2.07	2.06	0.97	0.34	0.87	TRUE	TRUE	TRUE	3
P26368	U2AF2 Splicing factor U2AF 65 kDa subunit	U2AF2	2.54	2.07	2.06	1.04	0.26	0.17	TRUE	TRUE	TRUE	3
P14550	AKR1A1 Alcohol dehydrogenase	AKR1A1	7.05	2.06	2.06	9.57	0.25	0.23	TRUE	TRUE	TRUE	3
Q15149	PLEC Plectin	PLEC	2.49	2.05	2.06	1.57	1.33	1.76	TRUE	TRUE	TRUE	3
Q9NYF8	BCLAF1 Bcl-2-associated transcription factor 1	BCLAF1	2.44	2.02	2.06	0.79	0.85	0.37	TRUE	TRUE	TRUE	3
P31943	HNRNPH1 Heterogeneous nuclear ribonucleoprotein H	HNRNPH1	2.45	2	2.06	1.14	0.53	0.71	TRUE	TRUE	TRUE	3
O00148	DDX39A ATP-dependent RNA helicase DDX39A	DDX39A	2.72	2.39	2.05	0.72	0.35	0.89	TRUE	TRUE	TRUE	3
P33316	DUT Deoxyuridine 5-triphosphate nucleotidohydrolase,	DUT	2.51	2.17	2.05	0.29	0.49	0.5	TRUE	TRUE	TRUE	3
P31937	HIBADH 3-hydroxyisobutyrate dehydrogenase, mitochondrial	HIBADH	4.28	2.16	2.05	0.74	0.28	0.64	TRUE	TRUE	TRUE	3
P22694	PRKACB cAMP-dependent protein kinase catalytic subunit be	PRKACB	2.35	2.06	2.05	0.44	0.52	0.16	TRUE	TRUE	TRUE	3
P54886	ALDH18A1 Delta-1-pyrroline-5-carboxylate synthase	ALDH18A1	2.4	2.03	2.05	0.64	0.46	0.48	TRUE	TRUE	TRUE	3
P17612	PRKACA cAMP-dependent protein kinase catalytic subunit al	PRKACA	2.25	2	2.05	0.46	0.44	0.18	TRUE	TRUE	TRUE	3
O00461	GOLIM4 Golgi integral membrane protein 4	GOLIM4	2.31	2.68	2.04	0.65	0	0.24	TRUE	TRUE	TRUE	3
O95861	BPNT1 3(2),5-bisphosphate nucleotidase 1	BPNT1	3.42	2.21	2.04	2.58	0.77	0.29	TRUE	TRUE	TRUE	3
Q92769	HDAC2 Histone deacetylase 2	HDAC2	2.44	2.12	2.04	3.31	0.42	0.3	TRUE	TRUE	TRUE	3
Q9BUP3	HTATIP2 Oxidoreductase HTATIP2	HTATIP2	12.04	13.63	2.03	0	0	0	TRUE	TRUE	TRUE	3
O60313	OPA1 Dynamin-like 120 kDa protein, mitochondrial	OPA1	3.21	2.66	2.03	4.99	6.35	0.81	TRUE	TRUE	TRUE	3
Q1KMD3	HNRNPUL2 Heterogeneous nuclear ribonucleoprotein U-like pro	HNRNPUL2	2.62	2.34	2.03	3.17	0.94	0.4	TRUE	TRUE	TRUE	3
Q15738	NSDHL Sterol-4-alpha-carboxylate 3-dehydrogenase, decarb	NSDHL	2.56	2.22	2.03	0	0.54	0.36	TRUE	TRUE	TRUE	3
P22059	OSBP Oxysterol-binding protein 1	OSBP	2.15	2.18	2.03	0.68	0.32	0.4	TRUE	TRUE	TRUE	3
P49959	MRE11A Double-strand break repair protein MRE11A	MRE11A	3.08	2.14	2.03	0.95	0.52	0.4	TRUE	TRUE	TRUE	3
O75367	H2AFY Core histone macro-H2A.1	H2AFY	2.44	2.13	2.03	1.71	0.47	0.73	TRUE	TRUE	TRUE	3
Q9UBQ7	GRHPR Glyoxylate reductase/hydroxypyruvate reductase	GRHPR	2.59	2.35	2.02	0.31	1.63	0.56	TRUE	TRUE	TRUE	3
P49257	LMAN1 Protein ERGIC-53	LMAN1	2.7	2.34	2.02	1.93	0.65	0.34	TRUE	TRUE	TRUE	3
P35232	PHB Prohibitin	PHB	2.85	2.33	2.02	0.71	0.35	0.38	TRUE	TRUE	TRUE	3
Q96FW1	OTUB1 Ubiquitin thioesterase OTUB1	OTUB1	2.7	2.29	2.02	0.31	0.27	0.29	TRUE	TRUE	TRUE	3
Q96KP4	CNDP2 Cytosolic non-specific dipeptidase	CNDP2	3.05	2.21	2.02	2.07	0.6	0.44	TRUE	TRUE	TRUE	3
Q9Y376	CAB39 Calcium-binding protein 39	CAB39	3.7	2.11	2.02	0	0	0.49	TRUE	TRUE	TRUE	3
Q9UN86	G3BP2 Ras GTPase-activating protein-binding protein 2	G3BP2	3.7	2.5	2.01	5.02	2.67	1.07	TRUE	TRUE	TRUE	3
Q9NZN3	EHD3 EH domain-containing protein 3	EHD3	2.76	2.39	2.01	0.16	0.4	0.82	TRUE	TRUE	TRUE	3
P30048	PRDX3 Thioredoxin-dependent peroxide reductase, mitochon	PRDX3	2.62	2.28	2.01	0.53	0.79	0.41	TRUE	TRUE	TRUE	3
Q13547	HDAC1 Histone deacetylase 1	HDAC1	2.08	2.15	2.01	0.96	0.48	4.92	TRUE	TRUE	TRUE	3
P24928	POLR2A DNA-directed RNA polymerase II subunit RPB1	POLR2A	3.37	2.05	2.01	1.16	1.72	0.64	TRUE	TRUE	TRUE	3
P31327	CPS1 Carbamoyl-phosphate synthase	CPS1	2.4	2.02	2.01	1.7	1.44	0.62	TRUE	TRUE	TRUE	3
P04075	ALDOA Fructose-bisphosphate aldolase A	ALDOA	2.11	2.01	2.01	0.95	0.33	0.76	TRUE	TRUE	TRUE	3
Q7L1Q6	BZW1 Basic leucine zipper and W2 domain-containing prot	BZW1	3.03	2.3	2	3.22	0.66	1.12	TRUE	TRUE	TRUE	3
P54920	NAPA Alpha-soluble NSF attachment protein	NAPA	3.12	2.23	2	2.63	0.77	0.59	TRUE	TRUE	TRUE	3
Q92900	UPF1 Regulator of nonsense transcripts 1	UPF1	2.33	2.2	2	3.35	1.05	0.33	TRUE	TRUE	TRUE	3
P55072	VCP Transitional endoplasmic reticulum ATPase	VCP	2.42	2.06	2	0.56	2.41	0.85	TRUE	TRUE	TRUE	3
P52788	SMS Spermine synthase	SMS	2.19	2.03	2	1.31	0.28	0.66	TRUE	TRUE	TRUE	3
Q9Y2G1	MRF Myelin gene regulatory factor	MRF	0	15	15	0	0	0	FALSE	TRUE	TRUE	2
P35914	HMGCL Hydroxymethylglutaryl-CoA lyase, mitochondrial	HMGCL	0	14.67	15	0	0.47	0	FALSE	TRUE	TRUE	2
Q86UL8	MAGI2 Membrane-associated guanylate kinase, WW and PDZ d	MAGI2	0	13.9	15	0	0	0	FALSE	TRUE	TRUE	2
Q9NZZ3	CHMP5 Charged multivesicular body protein 5	CHMP5	0	3.19	15	0	0	6.25	FALSE	TRUE	TRUE	2
Q13442	PDAP1 28 kDa heat- and acid-stable phosphoprotein	PDAP1	14.23	0.55	15	1.09	0	0	TRUE	FALSE	TRUE	2
E9PSI1	TM9SF1 Transmembrane 9 superfamily member 1	TM9SF1	13.01	0	15	0	0	0	TRUE	FALSE	TRUE	2
Q14D22	CHMP4A Charged multivesicular body protein 4a	CHMP4A	13.01	0	15	0	0	0	TRUE	FALSE	TRUE	2
P55081	MFAP1 Microfibrillar-associated protein 1	MFAP1	9.95	0	15	4.45	0	0	TRUE	FALSE	TRUE	2
O94966	USP19 Ubiquitin carboxyl-terminal hydrolase 19	USP19	9.21	0	15	2.54	0	0	TRUE	FALSE	TRUE	2
Q96NC0	ZMAT2 Zinc finger matrin-type protein 2	ZMAT2	7.03	0	15	0	0	0	TRUE	FALSE	TRUE	2
Q15007	WTAP Pre-mRNA-splicing regulator WTAP	WTAP	4.44	0	15	0	0	0	TRUE	FALSE	TRUE	2
Q9Y3B8	REXO2 Oligoribonuclease, mitochondrial	REXO2	2.77	0	15	0	0	0	TRUE	FALSE	TRUE	2
Q13637	RAB32 Ras-related protein Rab-32	RAB32	2.22	1.53	13.96	0	7.57	0	TRUE	FALSE	TRUE	2
Q9Y3B9	RRP15 RRP15-like protein	RRP15	15	0	11.46	0	0	1.21	TRUE	FALSE	TRUE	2
Q8NBJ7	SUMF2 Sulfatase-modifying factor 2	SUMF2	8.26	0	9.97	7	0	7.11	TRUE	FALSE	TRUE	2
P49454	CENPF Centromere protein F	CENPF	3.9	0	9.96	6.49	0	7.13	TRUE	FALSE	TRUE	2
O75940	SMNDC1 Survival of motor neuron-related-splicing factor 3	SMNDC1	9.96	0	9.75	6.15	0	7.42	TRUE	FALSE	TRUE	2
Q99996	AKAP9 A-kinase anchor protein 9	AKAP9	5.3	0	9.44	0	0	7.86	TRUE	FALSE	TRUE	2
P61077	UBE2D3 Ubiquitin-conjugating enzyme E2 D3	UBE2D3	3.33	0	9.06	0	0	8.4	TRUE	FALSE	TRUE	2
P62837	UBE2D2 Ubiquitin-conjugating enzyme E2 D2	UBE2D2	3.33	0	9.06	0	0	8.4	TRUE	FALSE	TRUE	2
P26885	FKBP2 Peptidyl-prolyl cis-trans isomerase FKBP2	FKBP2	0	4.78	9.01	0	1.99	4.65	FALSE	TRUE	TRUE	2
Q8WXH0	SYNE2 Nesprin-2	SYNE2	2.14	0	8.65	0	0	8.98	TRUE	FALSE	TRUE	2
Q9P2N7	KLHL13 Kelch-like protein 13	KLHL13	2.02	0	8.64	0	0	8.99	TRUE	FALSE	TRUE	2
P11532	DMD Dystrophin	DMD	0	2.39	8.54	0	0	9.13	FALSE	TRUE	TRUE	2
Q9UIC8	LCMT1 Leucine carboxyl methyltransferase 1	LCMT1	9.6	0	8.52	7.64	0	9.16	TRUE	FALSE	TRUE	2
Q8NFC6	BOD1L1 Biorientation of chromosomes in cell division prot	BOD1L1	8.25	0	8.52	0	0	9.17	TRUE	FALSE	TRUE	2
Q9NVE7	PANK4 Pantothenate kinase 4	PANK4	2.51	0	8.34	3.43	0	9.43	TRUE	FALSE	TRUE	2
Q9BYD1	MRPL13 39S ribosomal protein L13, mitochondrial	MRPL13	2.88	0	8.02	0.78	0	9.87	TRUE	FALSE	TRUE	2
O75330	HMMR Hyaluronan mediated motility receptor	HMMR	4.69	0	8	6.28	0	0	TRUE	FALSE	TRUE	2
Q13439	GOLGA4 Golgin subfamily A member 4	GOLGA4	10.28	1.77	7.49	4.77	0.71	5.29	TRUE	FALSE	TRUE	2
P57081	WDR4 tRNA (guanine-N(7)-)-methyltransferase subunit WDR	WDR4	2.24	0	7.47	0	0	0	TRUE	FALSE	TRUE	2
Q9NRF8	CTPS2 CTP synthase 2	CTPS2	0	3.55	7.21	0	1.41	6.05	FALSE	TRUE	TRUE	2
Q9Y2D5	AKAP2 A-kinase anchor protein 2	AKAP2	15	0	7.09	0	0	0	TRUE	FALSE	TRUE	2
P09914	IFIT1 Interferon-induced protein with tetratricopeptide	IFIT1	15	0	6.54	0	0	3.29	TRUE	FALSE	TRUE	2
Q13555	CAMK2G Calcium/calmodulin-dependent protein kinase type I	CAMK2G	2.54	1.81	6.5	5.65	0	6.35	TRUE	FALSE	TRUE	2
Q9UDY8	MALT1 Mucosa-associated lymphoid tissue lymphoma translo	MALT1	1.92	4.82	6.14	0	0	6.17	FALSE	TRUE	TRUE	2
Q5JPE7	NOMO2 Nodal modulator 2	NOMO2	2.57	0	6.12	0	0	5.92	TRUE	FALSE	TRUE	2
Q15056	EIF4H Eukaryotic translation initiation factor 4H	EIF4H	11.43	1.85	5.96	4.99	0	0	TRUE	FALSE	TRUE	2
P14174	MIF Macrophage migration inhibitory factor	MIF	0	6.97	5.81	0	1.7	0	FALSE	TRUE	TRUE	2
O95235	KIF20A Kinesin-like protein KIF20A	KIF20A	0	2.02	5.67	0	1.29	3.22	FALSE	TRUE	TRUE	2
P18615	RDBP Negative elongation factor E	RDBP	10.38	0	5.6	5.18	0	5.23	TRUE	FALSE	TRUE	2
O75410	TACC1 Transforming acidic coiled-coil-containing protein	TACC1	5.33	0	5.33	2.72	0	4.3	TRUE	FALSE	TRUE	2
Q13769	THOC5 THO complex subunit 5 homolog	THOC5	0.25	3.09	5.28	0	0	0	FALSE	TRUE	TRUE	2
Q9P2N5	RBM27 RNA-binding protein 27	RBM27	4.45	0	4.98	0	0	2.45	TRUE	FALSE	TRUE	2
Q7Z4W1	DCXR L-xylulose reductase	DCXR	0	6.3	4.94	0	0	6.3	FALSE	TRUE	TRUE	2
O43414	ERI3 ERI1 exoribonuclease 3	ERI3	2.41	0	4.87	0	0	0	TRUE	FALSE	TRUE	2
Q5VT52	RPRD2 Regulation of nuclear pre-mRNA domain-containing p	RPRD2	7.8	0	4.85	6.72	0	3.78	TRUE	FALSE	TRUE	2
Q53FA7	TP53I3 Quinone oxidoreductase PIG3	TP53I3	5.39	0	4.77	0.59	0	0	TRUE	FALSE	TRUE	2
P29084	GTF2E2 Transcription initiation factor IIE subunit beta	GTF2E2	4.91	0	4.76	6.22	0	0	TRUE	FALSE	TRUE	2
Q05209	PTPN12 Tyrosine-protein phosphatase non-receptor type 12	PTPN12	3.08	0	4.66	6.09	0	1.74	TRUE	FALSE	TRUE	2
P23497	SP100 Nuclear autoantigen Sp-100	SP100	0	9.29	4.55	0	8.07	0.93	FALSE	TRUE	TRUE	2
Q9Y315	DERA Putative deoxyribose-phosphate aldolase	DERA	9.36	1.47	4.53	7.98	0	0	TRUE	FALSE	TRUE	2
O60216	RAD21 Double-strand-break repair protein rad21 homolog	RAD21	0	2.9	4.52	0	1.84	1.15	FALSE	TRUE	TRUE	2
Q9Y2U5	MAP3K2 Mitogen-activated protein kinase kinase kinase 2	MAP3K2	2.77	0	4.5	0	0	0.98	TRUE	FALSE	TRUE	2
Q9H4G4	GLIPR2 Golgi-associated plant pathogenesis-related protei	GLIPR2	0	2.93	4.43	0	0	0	FALSE	TRUE	TRUE	2
Q9UJ70	NAGK N-acetyl-D-glucosamine kinase	NAGK	3.46	0	4.36	2.85	0	0.06	TRUE	FALSE	TRUE	2
Q96MX6	WDR92 WD repeat-containing protein 92	WDR92	15	0	4.33	0	0	0	TRUE	FALSE	TRUE	2
O43290	SART1 U4/U6.U5 tri-snRNP-associated protein 1	SART1	6.17	0	4.11	5.83	0	0	TRUE	FALSE	TRUE	2
Q9NUJ1	ABHD10 Abhydrolase domain-containing protein 10, mitochon	ABHD10	0	4.98	4.08	0	0	1.36	FALSE	TRUE	TRUE	2
Q04837	SSBP1 Single-stranded DNA-binding protein, mitochondrial	SSBP1	0	4.93	4.08	0	0	0	FALSE	TRUE	TRUE	2
Q96TA2	YME1L1 ATP-dependent zinc metalloprotease YME1L1	YME1L1	15	1.27	4.06	0	0	1.37	TRUE	FALSE	TRUE	2
Q8WXX5	DNAJC9 DnaJ homolog subfamily C member 9	DNAJC9	3.52	0	3.95	0.39	0	0	TRUE	FALSE	TRUE	2
P60983	GMFB Glia maturation factor beta	GMFB	3.84	0	3.93	0	0	0	TRUE	FALSE	TRUE	2
Q14241	TCEB3 Transcription elongation factor B polypeptide 3	TCEB3	3.12	0	3.9	0	0	0.54	TRUE	FALSE	TRUE	2
Q9BTE6	AARSD1 Alanyl-tRNA editing protein Aarsd1	AARSD1	2.88	1.91	3.89	5.07	0.55	0.34	TRUE	FALSE	TRUE	2
Q9NR46	SH3GLB2 Endophilin-B2	SH3GLB2	0	3.67	3.87	0	0.76	0	FALSE	TRUE	TRUE	2
P10619	CTSA Lysosomal protective protein	CTSA	0	3.78	3.86	0	2.6	1.78	FALSE	TRUE	TRUE	2
P52594	AGFG1 Arf-GAP domain and FG repeat-containing protein 1	AGFG1	3.7	0	3.84	1.61	0	0.3	TRUE	FALSE	TRUE	2
P53701	HCCS Cytochrome c-type heme lyase	HCCS	15	0	3.83	0	0	0	TRUE	FALSE	TRUE	2
Q9NZJ0	DTL Denticleless protein homolog	DTL	1.44	4.46	3.82	0	0.3	1.19	FALSE	TRUE	TRUE	2
Q92804	TAF15 TATA-binding protein-associated factor 2N	TAF15	0	3.86	3.8	0	0.11	0.62	FALSE	TRUE	TRUE	2
Q969G3	SMARCE1 SWI/SNF-related matrix-associated actin-dependent	SMARCE1	0	3.21	3.8	0	0	5.38	FALSE	TRUE	TRUE	2
Q9UNZ2	NSFL1C NSFL1 cofactor p47	NSFL1C	8.44	1.18	3.77	7.23	0	0	TRUE	FALSE	TRUE	2
Q6NVY1	HIBCH 3-hydroxyisobutyryl-CoA hydrolase, mitochondrial	HIBCH	4.23	0	3.73	5.84	0	0	TRUE	FALSE	TRUE	2
Q9H3P2	WHSC2 Negative elongation factor A	WHSC2	3.5	1.92	3.64	0	0	0	TRUE	FALSE	TRUE	2
Q9UMY4	SNX12 Sorting nexin-12	SNX12	4.91	0	3.59	0	0	0.69	TRUE	FALSE	TRUE	2
O60934	NBN Nibrin	NBN	4.03	0	3.59	0	0	0	TRUE	FALSE	TRUE	2
Q9Y5P4	COL4A3BP Collagen type IV alpha-3-binding protein	COL4A3BP	3.39	0	3.56	3.32	0	0	TRUE	FALSE	TRUE	2
O75569	PRKRA Interferon-inducible double stranded RNA-dependent	PRKRA	0	2.51	3.55	0	0	1.16	FALSE	TRUE	TRUE	2
O75152	ZC3H11A Zinc finger CCCH domain-containing protein 11A	ZC3H11A	3.67	1.35	3.53	0.68	0	0.57	TRUE	FALSE	TRUE	2
A0MZ66	KIAA1598 Shootin-1	KIAA1598	4.32	1.8	3.52	5.86	0.76	5.56	TRUE	FALSE	TRUE	2
O60942	RNGTT mRNA-capping enzyme	RNGTT	0.25	2.92	3.5	0	1.74	0	FALSE	TRUE	TRUE	2
P11388	TOP2A DNA topoisomerase 2-alpha	TOP2A	2.59	1.82	3.5	4.54	8.17	2.89	TRUE	FALSE	TRUE	2
Q9UHV9	PFDN2 Prefoldin subunit 2	PFDN2	11.2	0	3.49	5.37	0	0	TRUE	FALSE	TRUE	2
Q13823	GNL2 Nucleolar GTP-binding protein 2	GNL2	2.05	1.82	3.46	0	1.32	0.11	TRUE	FALSE	TRUE	2
O43852	CALU Calumenin	CALU	13.24	1.09	3.45	4.47	2.62	0.69	TRUE	FALSE	TRUE	2
P40818	USP8 Ubiquitin carboxyl-terminal hydrolase 8	USP8	15	0	3.42	0	0	1.12	TRUE	FALSE	TRUE	2
Q5T9A4	ATAD3B ATPase family AAA domain-containing protein 3B	ATAD3B	2.28	1.56	3.41	0.68	0.83	1.38	TRUE	FALSE	TRUE	2
Q15276	RABEP1 Rab GTPase-binding effector protein 1	RABEP1	1.07	15	3.35	0	0	0	FALSE	TRUE	TRUE	2
Q92522	H1FX Histone H1x	H1FX	2.96	0	3.35	0.22	0	0	TRUE	FALSE	TRUE	2
Q15434	RBMS2 RNA-binding motif, single-stranded-interacting pro	RBMS2	5.35	0	3.34	0	0	0	TRUE	FALSE	TRUE	2
Q9BZE1	MRPL37 39S ribosomal protein L37, mitochondrial	MRPL37	1.83	2.02	3.27	0	0.77	0.42	FALSE	TRUE	TRUE	2
I3L080	HDGFRP2 Hepatoma-derived growth factor-related protein 2	HDGFRP2	11.47	0	3.27	0	0	1.44	TRUE	FALSE	TRUE	2
O95793	STAU1 Double-stranded RNA-binding protein Staufen homolo	STAU1	5.03	0	3.26	1.32	0	0	TRUE	FALSE	TRUE	2
Q9UL25	RAB21 Ras-related protein Rab-21	RAB21	4.04	0	3.23	5.81	0	0	TRUE	FALSE	TRUE	2
O14530	TXNDC9 Thioredoxin domain-containing protein 9	TXNDC9	2.44	0	3.23	1.89	0	1.18	TRUE	FALSE	TRUE	2
P20908	COL5A1 Collagen alpha-1(V) chain	COL5A1	3.35	0	3.21	1.22	0	0.23	TRUE	FALSE	TRUE	2
Q9Y6Y0	IVNS1ABP Influenza virus NS1A-binding protein	IVNS1ABP	2.56	0	3.19	0.78	0	0.24	TRUE	FALSE	TRUE	2
O95453	PARN Poly(A)-specific ribonuclease PARN	PARN	0	2.22	3.18	0	0	0.81	FALSE	TRUE	TRUE	2
Q01970	PLCB3 1-phosphatidylinositol 4,5-bisphosphate phosphodie	PLCB3	2.87	1.58	3.16	2.42	2.85	1.12	TRUE	FALSE	TRUE	2
Q9BV86	NTMT1 N-terminal Xaa-Pro-Lys N-methyltransferase 1	NTMT1	4.78	0	3.16	0	0	0	TRUE	FALSE	TRUE	2
Q9Y2S7	POLDIP2 Polymerase delta-interacting protein 2	POLDIP2	2.28	0	3.16	0.36	0	0	TRUE	FALSE	TRUE	2
Q9H269	VPS16 Vacuolar protein sorting-associated protein 16 hom	VPS16	0	2.11	3.13	0	0	0	FALSE	TRUE	TRUE	2
P51452	DUSP3 Dual specificity protein phosphatase 3	DUSP3	15	0	3.13	0	0	0.84	TRUE	FALSE	TRUE	2
Q96RE7	NACC1 Nucleus accumbens-associated protein 1	NACC1	4.39	0	3.13	0	0	0	TRUE	FALSE	TRUE	2
P30622	CLIP1 CAP-Gly domain-containing linker protein 1	CLIP1	4.18	1.96	3.12	4.33	1.42	4.11	TRUE	FALSE	TRUE	2
Q8IWX8	CHERP Calcium homeostasis endoplasmic reticulum protein	CHERP	3.93	0	3.1	6.41	0	0	TRUE	FALSE	TRUE	2
Q86XP3	DDX42 ATP-dependent RNA helicase DDX42	DDX42	4.29	1.86	3.09	3.97	0.94	1.76	TRUE	FALSE	TRUE	2
P21108	PRPS1L1 Ribose-phosphate pyrophosphokinase 3	PRPS1L1	2.91	0	3.09	0.43	0	0.01	TRUE	FALSE	TRUE	2
Q13868	EXOSC2 Exosome complex component RRP4	EXOSC2	1.9	2.04	3.07	0.27	0	0	FALSE	TRUE	TRUE	2
P51948	MNAT1 CDK-activating kinase assembly factor MAT1	MNAT1	15	0	3.07	0	0	0	TRUE	FALSE	TRUE	2
Q12802	AKAP13 A-kinase anchor protein 13	AKAP13	7.39	0	3.07	0	0	0	TRUE	FALSE	TRUE	2
Q9HC36	RNMTL1 RNA methyltransferase-like protein 1	RNMTL1	0.84	3.6	3.06	0	0	0	FALSE	TRUE	TRUE	2
P54727	RAD23B UV excision repair protein RAD23 homolog B	RAD23B	3.1	1.06	3.06	0	0	1.49	TRUE	FALSE	TRUE	2
P42574	CASP3 Caspase-3	CASP3	15	0	3.06	7.12	0	0	TRUE	FALSE	TRUE	2
O14974	PPP1R12A Protein phosphatase 1 regulatory subunit 12A	PPP1R12A	8.43	0	3.06	9.29	0	0	TRUE	FALSE	TRUE	2
Q9BRJ2	MRPL45 39S ribosomal protein L45, mitochondrial	MRPL45	3.08	0	3.06	0	0	0.31	TRUE	FALSE	TRUE	2
Q92599	SEPT8 Septin-8	2017-09-08	3.08	0	3.06	1.1	0	0.26	TRUE	FALSE	TRUE	2
Q96A33	CCDC47 Coiled-coil domain-containing protein 47	CCDC47	2.62	1.12	3.05	0.87	0.5	1.16	TRUE	FALSE	TRUE	2
Q92882	OSTF1 Osteoclast-stimulating factor 1	OSTF1	0	2.54	3.04	0	0	0	FALSE	TRUE	TRUE	2
Q9NQW6	ANLN Actin-binding protein anillin	ANLN	2.3	0	3.02	4.54	0	1.1	TRUE	FALSE	TRUE	2
P61086	UBE2K Ubiquitin-conjugating enzyme E2 K	UBE2K	5.06	1.13	3	0.76	2.57	1.61	TRUE	FALSE	TRUE	2
Q13033	STRN3 Striatin-3	STRN3	5.58	0	3	5.49	0	0	TRUE	FALSE	TRUE	2
Q96KB5	PBK Lymphokine-activated killer T-cell-originated prot	PBK	2.87	1.94	2.97	5	0.07	0.42	TRUE	FALSE	TRUE	2
P78318	IGBP1 Immunoglobulin-binding protein 1	IGBP1	15	1.92	2.96	6.97	0	0	TRUE	FALSE	TRUE	2
Q15631	TSN Translin	TSN	2.06	1.68	2.95	1.01	0.5	0.43	TRUE	FALSE	TRUE	2
P53990	IST1 IST1 homolog	IST1	2.17	0	2.94	0.88	0	0.36	TRUE	FALSE	TRUE	2
P78330	PSPH Phosphoserine phosphatase	PSPH	2.97	1.99	2.92	0	0.64	0.81	TRUE	FALSE	TRUE	2
Q6DKJ4	NXN Nucleoredoxin	NXN	2.51	0.92	2.91	7.27	0	0	TRUE	FALSE	TRUE	2
Q86W92	PPFIBP1 Liprin-beta-1	PPFIBP1	4.06	0	2.91	2.14	0	0.3	TRUE	FALSE	TRUE	2
Q8NB90	SPATA5 Spermatogenesis-associated protein 5	SPATA5	3.13	0	2.88	0.88	0	0.36	TRUE	FALSE	TRUE	2
O43815	STRN Striatin	STRN	3.02	0	2.85	1.22	0	1.08	TRUE	FALSE	TRUE	2
Q6UWE0	LRSAM1 E3 ubiquitin-protein ligase LRSAM1	LRSAM1	15	0	2.84	0	0	0.76	TRUE	FALSE	TRUE	2
P49406	MRPL19 39S ribosomal protein L19, mitochondrial	MRPL19	2.35	0	2.84	0.49	0	1.1	TRUE	FALSE	TRUE	2
Q96F86	EDC3 Enhancer of mRNA-decapping protein 3	EDC3	3.05	0	2.83	0.24	0	0.31	TRUE	FALSE	TRUE	2
Q9Y3B7	MRPL11 39S ribosomal protein L11, mitochondrial	MRPL11	4.46	1.66	2.82	2.09	0	0	TRUE	FALSE	TRUE	2
O60341	KDM1A Lysine-specific histone demethylase 1A	KDM1A	2.56	1.97	2.81	1.44	1.03	5.74	TRUE	FALSE	TRUE	2
P68402	PAFAH1B2 Platelet-activating factor acetylhydrolase IB subu	PAFAH1B2	3.77	0	2.81	0.97	0	0	TRUE	FALSE	TRUE	2
Q9H4B7	TUBB1 Tubulin beta-1 chain	TUBB1	1.77	2.48	2.8	0	0.18	0.54	FALSE	TRUE	TRUE	2
O00499	BIN1 Myc box-dependent-interacting protein 1	BIN1	0.42	2.58	2.79	0.01	0.23	1.38	FALSE	TRUE	TRUE	2
Q15398	DLGAP5 Disks large-associated protein 5	DLGAP5	3.31	0	2.79	0	0	0	TRUE	FALSE	TRUE	2
Q15813	TBCE Tubulin-specific chaperone E	TBCE	2.42	0	2.79	0	0	0.33	TRUE	FALSE	TRUE	2
O75663	TIPRL TIP41-like protein	TIPRL	3.06	1.62	2.78	0.24	0.42	0	TRUE	FALSE	TRUE	2
Q9NW64	RBM22 Pre-mRNA-splicing factor RBM22	RBM22	2.68	0	2.76	0	0	1.07	TRUE	FALSE	TRUE	2
P11171	EPB41 Protein 4.1	EPB41	3.09	0	2.75	0	0	0.01	TRUE	FALSE	TRUE	2
Q8TAQ2	SMARCC2 SWI/SNF complex subunit SMARCC2	SMARCC2	2.71	1.93	2.74	0.75	0.35	0.23	TRUE	FALSE	TRUE	2
Q9H3P7	ACBD3 Golgi resident protein GCP60	ACBD3	4.17	0	2.74	5	0	1.56	TRUE	FALSE	TRUE	2
Q2NL82	TSR1 Pre-rRNA-processing protein TSR1 homolog	TSR1	2.5	1.77	2.73	4.75	0.98	0.8	TRUE	FALSE	TRUE	2
Q9ULX6	AKAP8L A-kinase anchor protein 8-like	AKAP8L	8.14	0	2.73	9.69	0	1.17	TRUE	FALSE	TRUE	2
Q9HB19	PLEKHA2 Pleckstrin homology domain-containing family A mem	PLEKHA2	2.94	0	2.73	1.02	0	0.98	TRUE	FALSE	TRUE	2
Q96IZ6	METTL2A Methyltransferase-like protein 2A	METTL2A	1.4	3	2.72	0	0	1.3	FALSE	TRUE	TRUE	2
P10620	MGST1 Microsomal glutathione S-transferase 1	MGST1	2.1	1.71	2.72	0.11	0.4	0	TRUE	FALSE	TRUE	2
Q86XL3	ANKLE2 Ankyrin repeat and LEM domain-containing protein 2	ANKLE2	2.76	0	2.72	0	0	0	TRUE	FALSE	TRUE	2
O43633	CHMP2A Charged multivesicular body protein 2a	CHMP2A	15	0	2.71	0	0	0	TRUE	FALSE	TRUE	2
O00401	WASL Neural Wiskott-Aldrich syndrome protein	WASL	2.37	0	2.71	1.05	0	0	TRUE	FALSE	TRUE	2
Q9H6D7	HAUS4 HAUS augmin-like complex subunit 4	HAUS4	0	2.59	2.7	0	0	0	FALSE	TRUE	TRUE	2
O95816	BAG2 BAG family molecular chaperone regulator 2	BAG2	3	1.9	2.7	0.83	0.94	4.81	TRUE	FALSE	TRUE	2
Q9C0C9	UBE2O Ubiquitin-conjugating enzyme E2 O	UBE2O	3.28	1.82	2.7	6.84	0.23	0.69	TRUE	FALSE	TRUE	2
Q7L014	DDX46 Probable ATP-dependent RNA helicase DDX46	DDX46	3.36	1.7	2.7	1.1	0.47	4.66	TRUE	FALSE	TRUE	2
Q6P587	FAHD1 Acylpyruvase FAHD1, mitochondrial	FAHD1	15	0	2.7	0	0	0.35	TRUE	FALSE	TRUE	2
Q6S8J3	POTEE POTE ankyrin domain family member E	POTEE	2.72	0	2.7	1.75	0	0.95	TRUE	FALSE	TRUE	2
P52564	MAP2K6 Dual specificity mitogen-activated protein kinase	MAP2K6	2.45	0	2.7	0	0	1.98	TRUE	FALSE	TRUE	2
Q92917	GPKOW G patch domain and KOW motifs-containing protein	GPKOW	3.31	0	2.69	0	0	0	TRUE	FALSE	TRUE	2
Q9GZT9	EGLN1 Egl nine homolog 1	EGLN1	2.87	0	2.69	0	0	0	TRUE	FALSE	TRUE	2
Q99848	EBNA1BP2 Probable rRNA-processing protein EBP2	EBNA1BP2	2.74	1.9	2.68	0.28	0.56	1.08	TRUE	FALSE	TRUE	2
Q8IU85	CAMK1D Calcium/calmodulin-dependent protein kinase type 1	CAMK1D	0	2.1	2.67	0	0.66	0.78	FALSE	TRUE	TRUE	2
P29353	SHC1 SHC-transforming protein 1	SHC1	2.6	1.58	2.66	0	0	0	TRUE	FALSE	TRUE	2
O75175	CNOT3 CCR4-NOT transcription complex subunit 3	CNOT3	3.71	0	2.65	0.98	0	0.61	TRUE	FALSE	TRUE	2
P46926	GNPDA1 Glucosamine-6-phosphate isomerase 1	GNPDA1	4.82	1.7	2.64	6.43	0	0.06	TRUE	FALSE	TRUE	2
P22695	UQCRC2 Cytochrome b-c1 complex subunit 2, mitochondrial	UQCRC2	1.92	2.67	2.63	0.01	1.03	0.48	FALSE	TRUE	TRUE	2
O15111	CHUK Inhibitor of nuclear factor kappa-B kinase subunit	CHUK	8.21	0	2.63	9.61	0	1.17	TRUE	FALSE	TRUE	2
Q641Q2	FAM21A WASH complex subunit FAM21A	FAM21A	2.79	0	2.63	0.33	0	0	TRUE	FALSE	TRUE	2
Q7Z4Q2	HEATR3 HEAT repeat-containing protein 3	HEATR3	2.83	1.36	2.62	0	0.57	1.28	TRUE	FALSE	TRUE	2
Q00535	CDK5 Cyclin-dependent kinase 5	CDK5	8.23	0	2.62	9.57	0	0.12	TRUE	FALSE	TRUE	2
P16333	NCK1 Cytoplasmic protein NCK1	NCK1	6.93	0	2.61	5.06	0	0.31	TRUE	FALSE	TRUE	2
Q8IV48	ERI1 3-5 exoribonuclease 1	ERI1	4.88	0	2.61	7.46	0	0	TRUE	FALSE	TRUE	2
Q92974	ARHGEF2 Rho guanine nucleotide exchange factor 2	ARHGEF2	4.02	0	2.61	0	0	0	TRUE	FALSE	TRUE	2
P29590	PML Protein PML	PML	1.88	2.47	2.6	0.17	0	0.52	FALSE	TRUE	TRUE	2
O14556	GAPDHS Glyceraldehyde-3-phosphate dehydrogenase, testis-s	GAPDHS	8.8	0	2.6	8.76	0	1.58	TRUE	FALSE	TRUE	2
Q9Y520	PRRC2C Protein PRRC2C	PRRC2C	3.8	0	2.6	6.49	0	0	TRUE	FALSE	TRUE	2
Q49A26	GLYR1 Putative oxidoreductase GLYR1	GLYR1	4.56	0	2.59	0	0	0.13	TRUE	FALSE	TRUE	2
Q7Z4S6	KIF21A Kinesin-like protein KIF21A	KIF21A	4.08	0	2.59	0	0	0.8	TRUE	FALSE	TRUE	2
Q9BRJ6	C7orf50 Uncharacterized protein C7orf50	C7orf50	2.33	1.92	2.58	0.97	0.5	0	TRUE	FALSE	TRUE	2
O43148	RNMT mRNA cap guanine-N7 methyltransferase	RNMT	2.62	1.64	2.58	0.57	0.96	0.56	TRUE	FALSE	TRUE	2
O43896	KIF1C Kinesin-like protein KIF1C	KIF1C	8.65	0	2.58	8.98	0	0	TRUE	FALSE	TRUE	2
Q96GM5	SMARCD1 SWI/SNF-related matrix-associated actin-dependent	SMARCD1	3.58	0	2.58	0	0	0	TRUE	FALSE	TRUE	2
P45877	PPIC Peptidyl-prolyl cis-trans isomerase C	PPIC	0	2.62	2.57	0	0.63	0.49	FALSE	TRUE	TRUE	2
Q12849	GRSF1 G-rich sequence factor 1	GRSF1	2.71	0	2.57	0	0	4.29	TRUE	FALSE	TRUE	2
Q9UHR4	BAIAP2L1 Brain-specific angiogenesis inhibitor 1-associated	BAIAP2L1	15	0	2.56	0	0	1.07	TRUE	FALSE	TRUE	2
Q15126	PMVK Phosphomevalonate kinase	PMVK	4.55	0	2.55	0.9	0	1.18	TRUE	FALSE	TRUE	2
Q8NF91	SYNE1 Nesprin-1	SYNE1	2.99	0	2.55	1.06	0	6.43	TRUE	FALSE	TRUE	2
Q9Y4G6	TLN2 Talin-2	TLN2	0	2.27	2.53	0	0.52	0.7	FALSE	TRUE	TRUE	2
Q9UHI6	DDX20 Probable ATP-dependent RNA helicase DDX20	DDX20	2.08	1.15	2.53	0.44	0	0	TRUE	FALSE	TRUE	2
P30046	DDT D-dopachrome decarboxylase	DDT	2.79	0	2.53	1.65	0	0.72	TRUE	FALSE	TRUE	2
O15372	EIF3H Eukaryotic translation initiation factor 3 subunit	EIF3H	2.42	1.99	2.52	0.72	1.22	0.23	TRUE	FALSE	TRUE	2
Q9Y3D9	MRPS23 28S ribosomal protein S23, mitochondrial	MRPS23	4.44	1.92	2.51	3.2	0	0.9	TRUE	FALSE	TRUE	2
Q15057	ACAP2 Arf-GAP with coiled-coil, ANK repeat and PH domain	ACAP2	3	0	2.51	0	0	0	TRUE	FALSE	TRUE	2
Q96C86	DCPS m7GpppX diphosphatase	DCPS	0	2.3	2.5	0	0.28	0.18	FALSE	TRUE	TRUE	2
Q63ZY3	KANK2 KN motif and ankyrin repeat domain-containing prot	KANK2	2.16	0	2.5	0.08	0	0.95	TRUE	FALSE	TRUE	2
Q00796	SORD Sorbitol dehydrogenase	SORD	2.51	1.99	2.49	0.89	0.25	3.47	TRUE	FALSE	TRUE	2
Q3ZCM7	TUBB8 Tubulin beta-8 chain	TUBB8	0	2.35	2.48	0	3.15	0.43	FALSE	TRUE	TRUE	2
Q9NPD3	EXOSC4 Exosome complex component RRP41	EXOSC4	2.47	0	2.48	0	0	0	TRUE	FALSE	TRUE	2
P14635	CCNB1 G2/mitotic-specific cyclin-B1	CCNB1	2.31	0	2.48	0.71	0	7.33	TRUE	FALSE	TRUE	2
P16403	HIST1H1C Histone H1.2	HIST1H1C	0	2.71	2.47	0	0.57	1.09	FALSE	TRUE	TRUE	2
Q53H96	PYCRL Pyrroline-5-carboxylate reductase 3	PYCRL	0	3.18	2.46	0	0	0	FALSE	TRUE	TRUE	2
P53582	METAP1 Methionine aminopeptidase 1	METAP1	1.86	2.7	2.46	0	0	0.31	FALSE	TRUE	TRUE	2
Q9Y2B0	CNPY2 Protein canopy homolog 2	CNPY2	0	14.68	2.45	0	0	0	FALSE	TRUE	TRUE	2
O96019	ACTL6A Actin-like protein 6A	ACTL6A	1.93	2.1	2.45	0.56	0.49	1.07	FALSE	TRUE	TRUE	2
Q9HC35	EML4 Echinoderm microtubule-associated protein-like 4	EML4	2.33	1.84	2.45	0.71	0.38	2.87	TRUE	FALSE	TRUE	2
P27707	DCK Deoxycytidine kinase	DCK	4.08	1.76	2.45	0	1.22	1.44	TRUE	FALSE	TRUE	2
P23258	TUBG1 Tubulin gamma-1 chain	TUBG1	3.35	0	2.45	0.88	0	0.94	TRUE	FALSE	TRUE	2
P49903	SEPHS1 Selenide, water dikinase 1	SEPHS1	2.94	1.72	2.44	0.31	0	0.72	TRUE	FALSE	TRUE	2
P02768	ALB Serum albumin	ALB	2.24	1.01	2.44	2.24	0.11	0.39	TRUE	FALSE	TRUE	2
O43324	EEF1E1 Eukaryotic translation elongation factor 1 epsilon	EEF1E1	2.87	1.73	2.43	2.14	0.12	0.11	TRUE	FALSE	TRUE	2
C9J1V9	Uncharacterized protein	Uncharacterized	2.87	0	2.43	2.14	0	0.11	TRUE	FALSE	TRUE	2
P32456	GBP2 Interferon-induced guanylate-binding protein 2	GBP2	1.91	2.12	2.42	0.65	0.37	0.8	FALSE	TRUE	TRUE	2
P50570	DNM2 Dynamin-2	DNM2	2.59	1.99	2.42	3.78	0.49	0.32	TRUE	FALSE	TRUE	2
Q99661	KIF2C Kinesin-like protein KIF2C	KIF2C	3.59	0	2.42	0.74	0	1.79	TRUE	FALSE	TRUE	2
A6NHL2	TUBAL3 Tubulin alpha chain-like 3	TUBAL3	2.74	0	2.42	2.19	0	0.63	TRUE	FALSE	TRUE	2
B0LM41	RBM14/RBM4 fusion Transcriptional coactivator CoAZ	RBM14/RBM4	2.46	0	2.42	1.19	0	4.76	TRUE	FALSE	TRUE	2
Q9H4A6	GOLPH3 Golgi phosphoprotein 3	GOLPH3	2.85	1.9	2.41	1.14	0.21	0	TRUE	FALSE	TRUE	2
Q15018	FAM175B BRISC complex subunit Abro1	FAM175B	7.14	0	2.41	0	0	0	TRUE	FALSE	TRUE	2
P83731	RPL24 60S ribosomal protein L24	RPL24	1.98	2.25	2.39	1.18	0.31	1.26	FALSE	TRUE	TRUE	2
O14965	AURKA Aurora kinase A	AURKA	2.55	0	2.39	0	0	0.54	TRUE	FALSE	TRUE	2
O76071	CIAO1 Probable cytosolic iron-sulfur protein assembly pr	CIAO1	0	15	2.38	0	0	1.1	FALSE	TRUE	TRUE	2
P28340	POLD1 DNA polymerase delta catalytic subunit	POLD1	2.36	1.9	2.38	4.41	0.55	7.35	TRUE	FALSE	TRUE	2
P61964	WDR5 WD repeat-containing protein 5	WDR5	2.43	1.89	2.38	1.25	0.34	0.12	TRUE	FALSE	TRUE	2
P52732	KIF11 Kinesin-like protein KIF11	KIF11	2.29	0.62	2.38	3.87	0	0	TRUE	FALSE	TRUE	2
Q86W56	PARG Poly(ADP-ribose) glycohydrolase	PARG	10.38	0	2.38	6.53	0	0	TRUE	FALSE	TRUE	2
Q15648	MED1 Mediator of RNA polymerase II transcription subuni	MED1	3.08	0	2.38	0	0	0.3	TRUE	FALSE	TRUE	2
J3QR44	CDK11B Cyclin-dependent kinase 11B	CDK11B	2.89	1.43	2.37	1.4	0.42	0.8	TRUE	FALSE	TRUE	2
P21127	CDK11B Cyclin-dependent kinase 11B	CDK11B	2.89	1.43	2.37	1.4	0.42	0.8	TRUE	FALSE	TRUE	2
O95218	ZRANB2 Zinc finger Ran-binding domain-containing protein	ZRANB2	2.53	0	2.37	0.9	0	0.62	TRUE	FALSE	TRUE	2
Q9Y5J1	UTP18 U3 small nucleolar RNA-associated protein 18 homol	UTP18	2.41	0	2.37	1.28	0	0.38	TRUE	FALSE	TRUE	2
P22626	HNRNPA2B1 Heterogeneous nuclear ribonucleoproteins A2/B1	HNRNPA2B1	2.26	1.9	2.36	2.53	0.48	2.75	TRUE	FALSE	TRUE	2
Q05048	CSTF1 Cleavage stimulation factor subunit 1	CSTF1	3.1	0	2.36	0.27	0	0	TRUE	FALSE	TRUE	2
Q9Y2X3	NOP58 Nucleolar protein 58	NOP58	2.18	1.77	2.35	0.55	0.25	0.59	TRUE	FALSE	TRUE	2
O94760	DDAH1 N(G),N(G)-dimethylarginine dimethylaminohydrolase	DDAH1	2.5	0	2.35	0.13	0	0	TRUE	FALSE	TRUE	2
Q96HN2	AHCYL2 Putative adenosylhomocysteinase 3	AHCYL2	2.39	0	2.35	0.72	0	0.51	TRUE	FALSE	TRUE	2
P55084	HADHB Trifunctional enzyme subunit beta, mitochondrial	HADHB	4.26	1.88	2.34	6.97	2.41	0.52	TRUE	FALSE	TRUE	2
P30042	C21orf33 ES1 protein homolog, mitochondrial	C21orf33	2.29	1.25	2.33	0.51	0.74	0.29	TRUE	FALSE	TRUE	2
O43314	PPIP5K2 Inositol hexakisphosphate and diphosphoinositol-pe	PPIP5K2	2.71	1.79	2.32	5.02	0.09	0	TRUE	FALSE	TRUE	2
Q9H832	UBE2Z Ubiquitin-conjugating enzyme E2 Z	UBE2Z	3.1	0	2.32	1.32	0	0	TRUE	FALSE	TRUE	2
P51149	RAB7A Ras-related protein Rab-7a	RAB7A	2	1.98	2.3	1.3	0.37	0.45	TRUE	FALSE	TRUE	2
Q8N7H5	PAF1 RNA polymerase II-associated factor 1 homolog	PAF1	2.53	0.57	2.3	1.68	0	0.14	TRUE	FALSE	TRUE	2
Q9NXG2	THUMPD1 THUMP domain-containing protein 1	THUMPD1	1.55	2.34	2.29	0	0.25	0.48	FALSE	TRUE	TRUE	2
P49643	PRIM2 DNA primase large subunit	PRIM2	5.12	1.97	2.29	5.53	0.54	3.04	TRUE	FALSE	TRUE	2
Q5T447	HECTD3 E3 ubiquitin-protein ligase HECTD3	HECTD3	2.98	0	2.29	0	0	0	TRUE	FALSE	TRUE	2
P35249	RFC4 Replication factor C subunit 4	RFC4	2.29	0	2.29	0.48	0	1.07	TRUE	FALSE	TRUE	2
Q9Y606	PUS1 tRNA pseudouridine synthase A, mitochondrial	PUS1	2.24	0	2.29	0	0	0.41	TRUE	FALSE	TRUE	2
O75439	PMPCB Mitochondrial-processing peptidase subunit beta	PMPCB	2.22	1.84	2.28	0.5	0.5	0.57	TRUE	FALSE	TRUE	2
Q96SB8	SMC6 Structural maintenance of chromosomes protein 6	SMC6	15	0	2.28	0	0	0	TRUE	FALSE	TRUE	2
Q9H7Z7	PTGES2 Prostaglandin E synthase 2	PTGES2	3.21	0	2.28	0	0	0	TRUE	FALSE	TRUE	2
P49840	GSK3A Glycogen synthase kinase-3 alpha	GSK3A	0	8.55	2.27	0	9.11	0.3	FALSE	TRUE	TRUE	2
Q9NUU7	DDX19A ATP-dependent RNA helicase DDX19A	DDX19A	2.69	1.96	2.27	0.9	0.37	0.32	TRUE	FALSE	TRUE	2
Q9Y224	C14orf166 UPF0568 protein C14orf166	C14orf166	2.63	0	2.27	0.68	0	0.56	TRUE	FALSE	TRUE	2
O00233	PSMD9 26S proteasome non-ATPase regulatory subunit 9	PSMD9	0	3.22	2.26	0	1.7	0.47	FALSE	TRUE	TRUE	2
Q96DI7	SNRNP40 U5 small nuclear ribonucleoprotein 40 kDa protein	SNRNP40	1.97	2.28	2.26	0.49	1.03	0.3	FALSE	TRUE	TRUE	2
O43615	TIMM44 Mitochondrial import inner membrane translocase su	TIMM44	2.82	1.83	2.26	0.46	0.5	0.34	TRUE	FALSE	TRUE	2
Q9UH62	ARMCX3 Armadillo repeat-containing X-linked protein 3	ARMCX3	2.1	1.85	2.25	0.29	0	0.22	TRUE	FALSE	TRUE	2
Q9NRW7	VPS45 Vacuolar protein sorting-associated protein 45	VPS45	3.34	1.4	2.25	0.46	0.78	0	TRUE	FALSE	TRUE	2
P37802	TAGLN2 Transgelin-2	TAGLN2	2.07	1.33	2.25	0.53	0.43	0.63	TRUE	FALSE	TRUE	2
Q6PD62	CTR9 RNA polymerase-associated protein CTR9 homolog	CTR9	3.09	1.21	2.25	0.6	0	0.57	TRUE	FALSE	TRUE	2
Q9BQ39	DDX50 ATP-dependent RNA helicase DDX50	DDX50	2.64	0	2.25	1.06	0	0	TRUE	FALSE	TRUE	2
Q8N6R0	METTL13 Methyltransferase-like protein 13	METTL13	2.43	0	2.25	0.39	0	0.29	TRUE	FALSE	TRUE	2
Q96RS6	NUDCD1 NudC domain-containing protein 1	NUDCD1	2.29	0	2.25	0	0	0	TRUE	FALSE	TRUE	2
P68366	TUBA4A Tubulin alpha-4A chain	TUBA4A	2.33	1.93	2.24	1.36	0.5	0.78	TRUE	FALSE	TRUE	2
Q969U7	PSMG2 Proteasome assembly chaperone 2	PSMG2	2.75	1.78	2.24	1.02	0.66	0.71	TRUE	FALSE	TRUE	2
Q8IWC1	MAP7D3 MAP7 domain-containing protein 3	MAP7D3	8.77	0	2.24	0	0	1.77	TRUE	FALSE	TRUE	2
Q00059	TFAM Transcription factor A, mitochondrial	TFAM	3.42	0	2.24	0.93	0	0	TRUE	FALSE	TRUE	2
P07093	SERPINE2 Glia-derived nexin	SERPINE2	2.65	0	2.24	0	0	0.37	TRUE	FALSE	TRUE	2
Q9P2I0	CPSF2 Cleavage and polyadenylation specificity factor su	CPSF2	2.27	0	2.24	1.87	0	0.11	TRUE	FALSE	TRUE	2
Q07955	SRSF1 Serine/arginine-rich splicing factor 1	SRSF1	1.98	2.42	2.23	0.41	0.65	0.55	FALSE	TRUE	TRUE	2
Q13263	TRIM28 Transcription intermediary factor 1-beta	TRIM28	2.6	1.96	2.23	0.92	0.59	2.66	TRUE	FALSE	TRUE	2
P17858	PFKL 6-phosphofructokinase, liver type	PFKL	2.41	1.78	2.23	0.94	0.68	1.86	TRUE	FALSE	TRUE	2
Q12933	TRAF2 TNF receptor-associated factor 2	TRAF2	2.52	0	2.23	0.67	0	0.95	TRUE	FALSE	TRUE	2
O75390	CS Citrate synthase, mitochondrial	CS	2.63	1.94	2.22	0.83	0.28	0.39	TRUE	FALSE	TRUE	2
Q01780	EXOSC10 Exosome component 10	EXOSC10	2.44	1.86	2.22	0.69	0.46	1.25	TRUE	FALSE	TRUE	2
Q15717	ELAVL1 ELAV-like protein 1	ELAVL1	2.3	1.82	2.22	0.68	0.43	0.54	TRUE	FALSE	TRUE	2
O75179	ANKRD17 Ankyrin repeat domain-containing protein 17	ANKRD17	1.56	2.66	2.21	0.52	0	5.04	FALSE	TRUE	TRUE	2
Q9BUJ2	HNRNPUL1 Heterogeneous nuclear ribonucleoprotein U-like pro	HNRNPUL1	2.39	1.98	2.21	1.48	0.28	0.31	TRUE	FALSE	TRUE	2
O00425	IGF2BP3 Insulin-like growth factor 2 mRNA-binding protein	IGF2BP3	2.4	1.94	2.21	0.27	0.19	0.4	TRUE	FALSE	TRUE	2
Q10713	PMPCA Mitochondrial-processing peptidase subunit alpha	PMPCA	8.18	1.86	2.21	9.64	5.96	5.33	TRUE	FALSE	TRUE	2
P62899	RPL31 60S ribosomal protein L31	RPL31	2.15	1.84	2.21	0.61	0.16	0.06	TRUE	FALSE	TRUE	2
O15226	NKRF NF-kappa-B-repressing factor	NKRF	2.2	1.73	2.21	1.42	0.55	5.19	TRUE	FALSE	TRUE	2
Q9BWF3	RBM4 RNA-binding protein 4	RBM4	2.53	1.7	2.21	0.99	0.66	4.54	TRUE	FALSE	TRUE	2
Q92879	CELF1 CUGBP Elav-like family member 1	CELF1	7.21	1.63	2.21	6.74	0.28	0.6	TRUE	FALSE	TRUE	2
O43823	AKAP8 A-kinase anchor protein 8	AKAP8	3.38	0	2.21	0	0	0	TRUE	FALSE	TRUE	2
O00139	KIF2A Kinesin-like protein KIF2A	KIF2A	3.36	0	2.21	0.8	0	0	TRUE	FALSE	TRUE	2
P42766	RPL35 60S ribosomal protein L35	RPL35	2.31	0	2.21	0.91	0	0.59	TRUE	FALSE	TRUE	2
Q8NDH3	NPEPL1 Probable aminopeptidase NPEPL1	NPEPL1	0	3.61	2.2	0	0	0	FALSE	TRUE	TRUE	2
P07205	PGK2 Phosphoglycerate kinase 2	PGK2	0	3.27	2.2	0	0.52	0.87	FALSE	TRUE	TRUE	2
Q07157	TJP1 Tight junction protein ZO-1	TJP1	3.21	1.98	2.2	1.88	5.44	0	TRUE	FALSE	TRUE	2
P09234	SNRPC U1 small nuclear ribonucleoprotein C	SNRPC	8.95	1.68	2.2	8.56	0.43	0.56	TRUE	FALSE	TRUE	2
Q8TDQ7	GNPDA2 Glucosamine-6-phosphate isomerase 2	GNPDA2	0	4.39	2.19	0	0	1.75	FALSE	TRUE	TRUE	2
Q9BYG3	MKI67IP MKI67 FHA domain-interacting nucleolar phosphoprot	MKI67IP	2.02	1.93	2.19	0.98	0	0.33	TRUE	FALSE	TRUE	2
Q9H7E9	C8orf33 UPF0488 protein C8orf33	C8orf33	2.45	1.74	2.19	0	0	0	TRUE	FALSE	TRUE	2
P28702	RXRB Retinoic acid receptor RXR-beta	RXRB	4.04	0	2.19	3.26	0	0	TRUE	FALSE	TRUE	2
Q9UDY2	TJP2 Tight junction protein ZO-2	TJP2	1.5	8.8	2.18	1.7	8.76	0.66	FALSE	TRUE	TRUE	2
P31751	AKT2 RAC-beta serine/threonine-protein kinase	AKT2	3.41	0	2.18	0	0	0	TRUE	FALSE	TRUE	2
P49023	PXN Paxillin	PXN	2.3	1.65	2.17	0	0	0.08	TRUE	FALSE	TRUE	2
P24539	ATP5F1 ATP synthase subunit b, mitochondrial	ATP5F1	2.47	1.45	2.17	0.23	0.4	0.18	TRUE	FALSE	TRUE	2
Q9UDR5	AASS Alpha-aminoadipic semialdehyde synthase, mitochond	AASS	3.44	0	2.17	0.99	0	0.6	TRUE	FALSE	TRUE	2
P52888	THOP1 Thimet oligopeptidase	THOP1	2.58	1.97	2.16	0.98	0.29	0.44	TRUE	FALSE	TRUE	2
P50990	CCT8 T-complex protein 1 subunit theta	CCT8	2.48	1.92	2.16	2.01	1.78	1.93	TRUE	FALSE	TRUE	2
Q9H488	POFUT1 GDP-fucose protein O-fucosyltransferase 1	POFUT1	2.73	1.78	2.16	0.84	0.42	0.08	TRUE	FALSE	TRUE	2
A0AVT1	UBA6 Ubiquitin-like modifier-activating enzyme 6	UBA6	2.63	1.47	2.16	3.31	1.3	0.41	TRUE	FALSE	TRUE	2
Q9GZS3	WDR61 WD repeat-containing protein 61	WDR61	2.41	0.98	2.16	0	0	0	TRUE	FALSE	TRUE	2
Q9BSJ2	TUBGCP2 Gamma-tubulin complex component 2	TUBGCP2	0	2.01	2.15	0	0.43	0.62	FALSE	TRUE	TRUE	2
Q7L0Y3	TRMT10C Mitochondrial ribonuclease P protein 1	TRMT10C	2.67	1.88	2.15	1.16	0.41	0.42	TRUE	FALSE	TRUE	2
Q99627	COPS8 COP9 signalosome complex subunit 8	COPS8	2.74	1.54	2.15	0.91	7.81	0.57	TRUE	FALSE	TRUE	2
O00232	PSMD12 26S proteasome non-ATPase regulatory subunit 12	PSMD12	2.24	1.99	2.14	0.7	0.71	0.72	TRUE	FALSE	TRUE	2
O43660	PLRG1 Pleiotropic regulator 1	PLRG1	3.08	1.53	2.14	1.11	0.24	0.43	TRUE	FALSE	TRUE	2
Q9NS87	KIF15 Kinesin-like protein KIF15	KIF15	9.46	0.63	2.14	6.72	0	0.68	TRUE	FALSE	TRUE	2
P00441	SOD1 Superoxide dismutase	SOD1	2.12	0	2.14	0.35	0	0	TRUE	FALSE	TRUE	2
Q71UM5	RPS27L 40S ribosomal protein S27-like	RPS27L	2.34	1.96	2.13	0.36	1.23	0.6	TRUE	FALSE	TRUE	2
P42677	RPS27 40S ribosomal protein S27	RPS27	2.25	1.92	2.13	0.38	1.2	0.6	TRUE	FALSE	TRUE	2
Q8TBC4	UBA3 NEDD8-activating enzyme E1 catalytic subunit	UBA3	3.03	1.9	2.13	0.58	0	0.18	TRUE	FALSE	TRUE	2
P28482	MAPK1 Mitogen-activated protein kinase 1	MAPK1	2.47	1.77	2.13	0.55	0.57	0.34	TRUE	FALSE	TRUE	2
Q9UPN9	TRIM33 E3 ubiquitin-protein ligase TRIM33	TRIM33	14.3	0	2.13	0	0	0	TRUE	FALSE	TRUE	2
P61254	RPL26 60S ribosomal protein L26	RPL26	1.93	2.03	2.12	0.34	0.17	0.4	FALSE	TRUE	TRUE	2
Q16555	DPYSL2 Dihydropyrimidinase-related protein 2	DPYSL2	2.28	1.94	2.12	0.86	0.53	2.38	TRUE	FALSE	TRUE	2
Q8NC51	SERBP1 Plasminogen activator inhibitor 1 RNA-binding prot	SERBP1	2.19	1.88	2.12	3.97	0.37	0.37	TRUE	FALSE	TRUE	2
Q9UJS0	SLC25A13 Calcium-binding mitochondrial carrier protein Aral	SLC25A13	2.91	1.66	2.12	0	0.61	0.6	TRUE	FALSE	TRUE	2
P08174	CD55 Complement decay-accelerating factor	CD55	2.09	1.56	2.12	0.37	0	0.18	TRUE	FALSE	TRUE	2
P35250	RFC2 Replication factor C subunit 2	RFC2	4.35	0	2.12	2.82	0	3.98	TRUE	FALSE	TRUE	2
P63220	RPS21 40S ribosomal protein S21	RPS21	3.85	0	2.12	0	0	0.53	TRUE	FALSE	TRUE	2
Q9BXS6	NUSAP1 Nucleolar and spindle-associated protein 1	NUSAP1	2.57	1.38	2.11	0.73	0.93	0.94	TRUE	FALSE	TRUE	2
O14908	GIPC1 PDZ domain-containing protein GIPC1	GIPC1	3.15	0.21	2.11	4.16	0	2.84	TRUE	FALSE	TRUE	2
Q92734	TFG Protein TFG	TFG	15	0	2.11	0	0	0	TRUE	FALSE	TRUE	2
Q9UKD2	MRTO4 mRNA turnover protein 4 homolog	MRTO4	2.02	1.83	2.1	0.27	0.47	0.16	TRUE	FALSE	TRUE	2
Q9HCC0	MCCC2 Methylcrotonoyl-CoA carboxylase beta chain, mitoch	MCCC2	2.45	1.53	2.1	0.01	0	0.68	TRUE	FALSE	TRUE	2
P49585	PCYT1A Choline-phosphate cytidylyltransferase A	PCYT1A	3.47	0	2.1	0.91	0	0.27	TRUE	FALSE	TRUE	2
Q9H4A3	WNK1 Serine/threonine-protein kinase WNK1	WNK1	2.96	0	2.1	0.26	0	0.23	TRUE	FALSE	TRUE	2
Q3LXA3	DAK Bifunctional ATP-dependent dihydroxyacetone kinase	DAK	2.35	0	2.1	0	0	0	TRUE	FALSE	TRUE	2
Q68EM7	ARHGAP17 Rho GTPase-activating protein 17	ARHGAP17	2.42	1.94	2.09	1.02	0.41	0.78	TRUE	FALSE	TRUE	2
P21399	ACO1 Cytoplasmic aconitate hydratase	ACO1	2.3	1.88	2.09	1.33	0.43	0.57	TRUE	FALSE	TRUE	2
P04183	TK1 Thymidine kinase, cytosolic	TK1	2.4	0	2.09	1.03	0	0	TRUE	FALSE	TRUE	2
P33176	KIF5B Kinesin-1 heavy chain	KIF5B	2.81	1.99	2.08	2.36	2.06	0.59	TRUE	FALSE	TRUE	2
P35080	PFN2 Profilin-2	PFN2	8.62	1.98	2.08	9.02	0	0	TRUE	FALSE	TRUE	2
P09972	ALDOC Fructose-bisphosphate aldolase C	ALDOC	2.04	1.97	2.08	0.4	0.32	0.38	TRUE	FALSE	TRUE	2
O43242	PSMD3 26S proteasome non-ATPase regulatory subunit 3	PSMD3	2.04	1.93	2.08	0.74	0.31	0.38	TRUE	FALSE	TRUE	2
O43865	AHCYL1 Putative adenosylhomocysteinase 2	AHCYL1	2.34	1.87	2.08	0.54	3.29	0.42	TRUE	FALSE	TRUE	2
Q01995	TAGLN Transgelin	TAGLN	2.18	1.87	2.08	0.69	0.44	1.38	TRUE	FALSE	TRUE	2
Q9Y6E2	BZW2 Basic leucine zipper and W2 domain-containing prot	BZW2	2.95	1.64	2.08	0.49	0.74	0.56	TRUE	FALSE	TRUE	2
P62244	RPS15A 40S ribosomal protein S15a	RPS15A	2.46	1.56	2.08	1.11	0.2	1.42	TRUE	FALSE	TRUE	2
P40123	CAP2 Adenylyl cyclase-associated protein 2	CAP2	2.71	1.49	2.08	0.69	0.59	0.17	TRUE	FALSE	TRUE	2
Q14671	PUM1 Pumilio homolog 1	PUM1	5.69	1.25	2.08	6.03	0	0.62	TRUE	FALSE	TRUE	2
Q16822	PCK2 Phosphoenolpyruvate carboxykinase	PCK2	7.34	0	2.08	6.92	0	0.74	TRUE	FALSE	TRUE	2
P33991	MCM4 DNA replication licensing factor MCM4	MCM4	2.55	1.99	2.07	0.83	0.54	0.51	TRUE	FALSE	TRUE	2
P30153	PPP2R1A Serine/threonine-protein phosphatase 2A 65 kDa reg	PPP2R1A	2.39	1.98	2.07	2.4	0.47	0.62	TRUE	FALSE	TRUE	2
Q14008	CKAP5 Cytoskeleton-associated protein 5	CKAP5	2.28	0.97	2.07	0.92	0.88	0.78	TRUE	FALSE	TRUE	2
Q5JSH3	WDR44 WD repeat-containing protein 44	WDR44	1.62	4.42	2.06	0.26	3.95	0.4	FALSE	TRUE	TRUE	2
P07814	EPRS Bifunctional glutamate/proline--tRNA ligase	EPRS	2.39	1.89	2.06	2.19	0.64	1.83	TRUE	FALSE	TRUE	2
P62241	RPS8 40S ribosomal protein S8	RPS8	2.11	1.86	2.06	0.6	0.38	0.96	TRUE	FALSE	TRUE	2
Q86W42	THOC6 THO complex subunit 6 homolog	THOC6	3.35	1.7	2.06	1.54	0	0	TRUE	FALSE	TRUE	2
Q66K14	TBC1D9B TBC1 domain family member 9B	TBC1D9B	4.55	0	2.06	0	0	1.07	TRUE	FALSE	TRUE	2
Q9P003	CNIH4 Protein cornichon homolog 4	CNIH4	2.19	0	2.06	0.44	0	0	TRUE	FALSE	TRUE	2
O75818	RPP40 Ribonuclease P protein subunit p40	RPP40	2.03	0	2.06	0	0	0	TRUE	FALSE	TRUE	2
Q9Y2H6	FNDC3A Fibronectin type-III domain-containing protein 3A	FNDC3A	0	8.21	2.05	0	9.61	0.92	FALSE	TRUE	TRUE	2
Q14244	MAP7 Ensconsin	MAP7	5.69	1.85	2.05	6.29	0.11	0.24	TRUE	FALSE	TRUE	2
P28066	PSMA5 Proteasome subunit alpha type-5	PSMA5	3.19	1.89	2.04	1.25	0.51	0.23	TRUE	FALSE	TRUE	2
Q9C0B1	FTO Alpha-ketoglutarate-dependent dioxygenase FTO	FTO	2.4	1.81	2.04	0.11	0	0.24	TRUE	FALSE	TRUE	2
Q86YQ8	CPNE8 Copine-8	CPNE8	2.7	1.8	2.04	0	0	0	TRUE	FALSE	TRUE	2
P31942	HNRNPH3 Heterogeneous nuclear ribonucleoprotein H3	HNRNPH3	2.08	1.6	2.04	0.34	0.2	4.13	TRUE	FALSE	TRUE	2
Q9GZT8	NIF3L1 NIF3-like protein 1	NIF3L1	2.18	1.43	2.04	0.3	0.46	0.29	TRUE	FALSE	TRUE	2
Q5T653	MRPL2 39S ribosomal protein L2, mitochondrial	MRPL2	15	0	2.04	0	0	0	TRUE	FALSE	TRUE	2
Q5T0N5	FNBP1L Formin-binding protein 1-like	FNBP1L	3.52	0	2.04	0	0	0	TRUE	FALSE	TRUE	2
Q6P1N0	CC2D1A Coiled-coil and C2 domain-containing protein 1A	CC2D1A	3.36	0	2.04	0	0	2.52	TRUE	FALSE	TRUE	2
Q16740	CLPP Putative ATP-dependent Clp protease proteolytic su	CLPP	3.29	0	2.04	6.07	0	0.57	TRUE	FALSE	TRUE	2
Q96SI9	STRBP Spermatid perinuclear RNA-binding protein	STRBP	2.27	0	2.04	0.81	0	0.28	TRUE	FALSE	TRUE	2
Q13057	COASY Bifunctional coenzyme A synthase	COASY	1.73	2.01	2.03	0.5	0.56	0.28	FALSE	TRUE	TRUE	2
P62820	RAB1A Ras-related protein Rab-1A	RAB1A	2.55	1.91	2.03	0.38	0.13	0.41	TRUE	FALSE	TRUE	2
P42224	STAT1 Signal transducer and activator of transcription 1	STAT1	2.37	1.91	2.03	4.06	3	1.57	TRUE	FALSE	TRUE	2
Q02878	RPL6 60S ribosomal protein L6	RPL6	2.38	1.9	2.03	0.62	0.76	0.82	TRUE	FALSE	TRUE	2
Q9NQW7	XPNPEP1 Xaa-Pro aminopeptidase 1	XPNPEP1	9.06	1.88	2.03	8.39	0.19	0.18	TRUE	FALSE	TRUE	2
O00330	PDHX Pyruvate dehydrogenase protein X component, mitoch	PDHX	3.63	0	2.03	2.1	0	0	TRUE	FALSE	TRUE	2
Q9BTE7	DCUN1D5 DCN1-like protein 5	DCUN1D5	0	2.06	2.02	0	0	0.14	FALSE	TRUE	TRUE	2
P51003	PAPOLA Poly(A) polymerase alpha	PAPOLA	2.19	1.98	2.02	0.58	0.8	0.92	TRUE	FALSE	TRUE	2
P21333	FLNA Filamin-A	FLNA	2.36	1.94	2.02	2.17	1.33	1.05	TRUE	FALSE	TRUE	2
O60716	CTNND1 Catenin delta-1	CTNND1	2.34	1.84	2.02	0.42	0.62	1.15	TRUE	FALSE	TRUE	2
P52597	HNRNPF Heterogeneous nuclear ribonucleoprotein F	HNRNPF	2.26	1.98	2.01	0.63	0.64	1.01	TRUE	FALSE	TRUE	2
Q9UH65	SWAP70 Switch-associated protein 70	SWAP70	2.76	1.96	2.01	1.23	0.27	0.82	TRUE	FALSE	TRUE	2
Q16270	IGFBP7 Insulin-like growth factor-binding protein 7	IGFBP7	2.45	1.95	2.01	0.84	0.48	1.28	TRUE	FALSE	TRUE	2
P49792	RANBP2 E3 SUMO-protein ligase RanBP2	RANBP2	2.15	1.87	2.01	2.01	2.74	0.99	TRUE	FALSE	TRUE	2
P13010	XRCC5 X-ray repair cross-complementing protein 5	XRCC5	2.24	1.79	2.01	0.58	0.53	0.77	TRUE	FALSE	TRUE	2
P16070	CD44 CD44 antigen	CD44	2.24	1.74	2.01	0.66	0.95	0.16	TRUE	FALSE	TRUE	2
Q5TFE4	NT5DC1 5-nucleotidase domain-containing protein 1	NT5DC1	2.25	1.65	2.01	0.36	0.41	0.93	TRUE	FALSE	TRUE	2
P61353	RPL27 60S ribosomal protein L27	RPL27	1.93	2.04	2	0.61	0.51	0.19	FALSE	TRUE	TRUE	2
Q8WUA2	PPIL4 Peptidyl-prolyl cis-trans isomerase-like 4	PPIL4	3.06	1.98	2	0.18	7.55	0	TRUE	FALSE	TRUE	2
P78371	CCT2 T-complex protein 1 subunit beta	CCT2	2.44	1.98	2	2.16	0.34	0.61	TRUE	FALSE	TRUE	2
Q9NZI8	IGF2BP1 Insulin-like growth factor 2 mRNA-binding protein	IGF2BP1	2.14	1.89	2	0.65	0.41	0.26	TRUE	FALSE	TRUE	2
Q15031	LARS2 Probable leucine--tRNA ligase, mitochondrial	LARS2	2.43	1.77	2	5.66	4.96	0.47	TRUE	FALSE	TRUE	2
P61224	RAP1B Ras-related protein Rap-1b	RAP1B	2.49	1.63	2	0.48	0	3.37	TRUE	FALSE	TRUE	2
P05091	ALDH2 Aldehyde dehydrogenase, mitochondrial	ALDH2	13.69	1.36	2	0	0.82	0.45	TRUE	FALSE	TRUE	2
Q6ZXV5	TMTC3 Transmembrane and TPR repeat-containing protein 3	TMTC3	2.43	0	2	0	0	0	TRUE	FALSE	TRUE	2
Q8NCW5	APOA1BP NAD(P)H-hydrate epimerase	APOA1BP	3.28	3.06	1.99	0.39	0.7	0.69	TRUE	TRUE	FALSE	2
Q96SU4	OSBPL9 Oxysterol-binding protein-related protein 9	OSBPL9	3.88	2.44	1.99	0.72	1.13	0.44	TRUE	TRUE	FALSE	2
Q9BWD1	ACAT2 Acetyl-CoA acetyltransferase, cytosolic	ACAT2	2.22	2.43	1.99	0.73	1.16	5.42	TRUE	TRUE	FALSE	2
P17174	GOT1 Aspartate aminotransferase, cytoplasmic	GOT1	2.9	2.12	1.99	0.9	0.51	0.84	TRUE	TRUE	FALSE	2
P46063	RECQL ATP-dependent DNA helicase Q1	RECQL	2.53	2.1	1.99	0.59	0.37	2.76	TRUE	TRUE	FALSE	2
Q92922	SMARCC1 SWI/SNF complex subunit SMARCC1	SMARCC1	2.31	2.08	1.99	0.68	3.7	0.8	TRUE	TRUE	FALSE	2
Q9H8S9	MOB1A MOB kinase activator 1A	MOB1A	2.85	2.07	1.99	0	0.01	0.81	TRUE	TRUE	FALSE	2
Q9UGI8	TES Testin	TES	2.22	2.03	1.99	0.59	0.43	0.46	TRUE	TRUE	FALSE	2
Q13347	EIF3I Eukaryotic translation initiation factor 3 subunit	EIF3I	2.29	2.02	1.99	2.15	0.39	0.45	TRUE	TRUE	FALSE	2
Q9H3S7	PTPN23 Tyrosine-protein phosphatase non-receptor type 23	PTPN23	2.1	2.94	1.98	1.41	0	0	TRUE	TRUE	FALSE	2
P00491	PNP Purine nucleoside phosphorylase	PNP	2.43	2.74	1.98	0.58	0.56	1	TRUE	TRUE	FALSE	2
O14950	MYL12B Myosin regulatory light chain 12B	MYL12B	2.52	2.36	1.98	0.37	0.24	7.56	TRUE	TRUE	FALSE	2
A8MW45	KRT17P1 Protein KRT17P1	KRT17P1	2.59	2.25	1.98	1.29	0.61	0.25	TRUE	TRUE	FALSE	2
P50914	RPL14 60S ribosomal protein L14	RPL14	2.13	2.16	1.98	0.28	0.38	0.26	TRUE	TRUE	FALSE	2
Q7LBC6	KDM3B Lysine-specific demethylase 3B	KDM3B	10.16	2.14	1.98	6.84	4.62	0	TRUE	TRUE	FALSE	2
P06493	CDK1 Cyclin-dependent kinase 1	CDK1	2.43	2.13	1.98	0.54	1.44	0.51	TRUE	TRUE	FALSE	2
P62917	RPL8 60S ribosomal protein L8	RPL8	2.34	2.05	1.98	0.27	3.98	0.34	TRUE	TRUE	FALSE	2
O15144	ARPC2 Actin-related protein 2/3 complex subunit 2	ARPC2	2.3	2	1.98	0.52	0.26	0.39	TRUE	TRUE	FALSE	2
P61163	ACTR1A Alpha-centractin	ACTR1A	2.72	2.43	1.97	0.16	5.66	0.33	TRUE	TRUE	FALSE	2
P19623	SRM Spermidine synthase	SRM	2.55	2.2	1.97	2.39	0.12	0.5	TRUE	TRUE	FALSE	2
Q6UW63	KDELC1 KDEL motif-containing protein 1	KDELC1	2.9	2.43	1.96	0	0	0.15	TRUE	TRUE	FALSE	2
P11766	ADH5 Alcohol dehydrogenase class-3	ADH5	2.33	2	1.96	4.01	0.83	0.31	TRUE	TRUE	FALSE	2
O60684	KPNA6 Importin subunit alpha-7	KPNA6	3.24	2.44	1.95	0.49	0.62	1.34	TRUE	TRUE	FALSE	2
P15927	RPA2 Replication protein A 32 kDa subunit	RPA2	2.59	2.44	1.94	0.02	0	0	TRUE	TRUE	FALSE	2
O75955	FLOT1 Flotillin-1	FLOT1	2.17	2.3	1.93	0.5	0.38	0.54	TRUE	TRUE	FALSE	2
Q13131	PRKAA1 5-AMP-activated protein kinase catalytic subunit	PRKAA1	2.88	2.49	1.91	0.57	0	6.65	TRUE	TRUE	FALSE	2
P23743	DGKA Diacylglycerol kinase alpha	DGKA	2.44	2.04	1.91	0.65	0	0.2	TRUE	TRUE	FALSE	2
P46100	ATRX Transcriptional regulator ATRX	ATRX	2.29	15	1.9	1.1	0	0.91	TRUE	TRUE	FALSE	2
P08240	SRPR Signal recognition particle receptor subunit alpha	SRPR	2.3	8.36	1.9	0.04	9.02	0.68	TRUE	TRUE	FALSE	2
P22033	MUT Methylmalonyl-CoA mutase, mitochondrial	MUT	8.86	2.51	1.9	8.69	0.71	0.39	TRUE	TRUE	FALSE	2
P68400	CSNK2A1 Casein kinase II subunit alpha	CSNK2A1	2.13	2.13	1.9	0.27	0.36	0.42	TRUE	TRUE	FALSE	2
P35251	RFC1 Replication factor C subunit 1	RFC1	3.04	2.65	1.89	0.5	0	0.78	TRUE	TRUE	FALSE	2
O43818	RRP9 U3 small nucleolar RNA-interacting protein 2	RRP9	2.4	2.56	1.89	0	0	0	TRUE	TRUE	FALSE	2
Q9BXS5	AP1M1 AP-1 complex subunit mu-1	AP1M1	2.21	2.18	1.88	0.6	0	0.45	TRUE	TRUE	FALSE	2
Q9Y2W1	THRAP3 Thyroid hormone receptor-associated protein 3	THRAP3	2.16	2.16	1.88	1.45	0.5	0.32	TRUE	TRUE	FALSE	2
Q92747	ARPC1A Actin-related protein 2/3 complex subunit 1A	ARPC1A	3.16	2.06	1.88	3.83	1.2	0.58	TRUE	TRUE	FALSE	2
Q13330	MTA1 Metastasis-associated protein MTA1	MTA1	2.56	2.06	1.88	6.41	0.15	0.29	TRUE	TRUE	FALSE	2
Q14684	RRP1B Ribosomal RNA processing protein 1 homolog B	RRP1B	2.15	2.04	1.88	4.11	0.46	1.24	TRUE	TRUE	FALSE	2
Q9UKV3	ACIN1 Apoptotic chromatin condensation inducer in the nu	ACIN1	2.48	2.01	1.88	0.64	0.13	0.47	TRUE	TRUE	FALSE	2
P61026	RAB10 Ras-related protein Rab-10	RAB10	3.93	3.08	1.87	0.93	0.22	0.03	TRUE	TRUE	FALSE	2
Q9NVG8	TBC1D13 TBC1 domain family member 13	TBC1D13	2.52	2.38	1.87	2.02	0	0	TRUE	TRUE	FALSE	2
Q9Y4E8	USP15 Ubiquitin carboxyl-terminal hydrolase 15	USP15	3.26	2.92	1.86	5.62	3.32	0.55	TRUE	TRUE	FALSE	2
P43246	MSH2 DNA mismatch repair protein Msh2	MSH2	2.3	2.26	1.86	0.82	4.67	0.51	TRUE	TRUE	FALSE	2
Q14694	USP10 Ubiquitin carboxyl-terminal hydrolase 10	USP10	2.46	2.26	1.85	1.09	0.92	0.6	TRUE	TRUE	FALSE	2
Q9Y2Z4	YARS2 Tyrosine--tRNA ligase, mitochondrial	YARS2	2.7	2.77	1.84	0.69	0	1.12	TRUE	TRUE	FALSE	2
Q6NXE6	ARMC6 Armadillo repeat-containing protein 6	ARMC6	2.98	2.66	1.84	0.29	0	0.6	TRUE	TRUE	FALSE	2
Q96C36	PYCR2 Pyrroline-5-carboxylate reductase 2	PYCR2	2.45	2.52	1.84	0.93	0.88	0.81	TRUE	TRUE	FALSE	2
O95361	TRIM16 Tripartite motif-containing protein 16	TRIM16	2.81	2.12	1.84	4.92	1.02	0.36	TRUE	TRUE	FALSE	2
Q15020	SART3 Squamous cell carcinoma antigen recognized by T-ce	SART3	2.57	2.03	1.84	0.47	0.54	0.76	TRUE	TRUE	FALSE	2
Q8WYA6	CTNNBL1 Beta-catenin-like protein 1	CTNNBL1	2.34	2.19	1.83	0.7	0.53	0.83	TRUE	TRUE	FALSE	2
P62829	RPL23 60S ribosomal protein L23	RPL23	2.35	2.13	1.83	0.5	0.26	0.28	TRUE	TRUE	FALSE	2
P14678	SNRPB Small nuclear ribonucleoprotein-associated protein	SNRPB	2.91	2.56	1.82	1.15	1	0.48	TRUE	TRUE	FALSE	2
P63162	SNRPN Small nuclear ribonucleoprotein-associated protein	SNRPN	2.91	2.56	1.82	1.15	1	0.48	TRUE	TRUE	FALSE	2
P48059	LIMS1 LIM and senescent cell antigen-like-containing dom	LIMS1	2.88	2.34	1.82	0.5	0.53	0.36	TRUE	TRUE	FALSE	2
O75223	GGCT Gamma-glutamylcyclotransferase	GGCT	2.3	2.23	1.82	0	0.29	0.44	TRUE	TRUE	FALSE	2
P16435	POR NADPH--cytochrome P450 reductase	POR	2.54	2.17	1.81	0.15	0.18	0.33	TRUE	TRUE	FALSE	2
Q9NWH9	SLTM SAFB-like transcription modulator	SLTM	2.18	4.24	1.8	0	0	0.06	TRUE	TRUE	FALSE	2
O75351	VPS4B Vacuolar protein sorting-associated protein 4B	VPS4B	2.96	2.59	1.8	0.63	0.36	0.56	TRUE	TRUE	FALSE	2
P62851	RPS25 40S ribosomal protein S25	RPS25	2.21	2.11	1.8	0.5	0.78	0.29	TRUE	TRUE	FALSE	2
Q01081	U2AF1 Splicing factor U2AF 35 kDa subunit	U2AF1	2.31	2.02	1.8	0.47	0.83	0.08	TRUE	TRUE	FALSE	2
Q7Z2E3	APTX Aprataxin	APTX	2.99	3.4	1.78	0	0.71	0.59	TRUE	TRUE	FALSE	2
O75131	CPNE3 Copine-3	CPNE3	2.43	2.19	1.78	0.31	1.08	0.44	TRUE	TRUE	FALSE	2
P13987	CD59 CD59 glycoprotein	CD59	2.24	2.58	1.76	5.89	0.91	0.6	TRUE	TRUE	FALSE	2
O14929	HAT1 Histone acetyltransferase type B catalytic subunit	HAT1	2.13	2.01	1.76	3.92	3.97	4.01	TRUE	TRUE	FALSE	2
O15145	ARPC3 Actin-related protein 2/3 complex subunit 3	ARPC3	2.18	2	1.76	0.96	0.35	1	TRUE	TRUE	FALSE	2
P35579	MYH9 Myosin-9	MYH9	2.31	2.16	1.75	0.95	0.63	0.67	TRUE	TRUE	FALSE	2
Q12888	TP53BP1 Tumor suppressor p53-binding protein 1	TP53BP1	2.79	2.12	1.74	0.55	1.13	6	TRUE	TRUE	FALSE	2
P25788	PSMA3 Proteasome subunit alpha type-3	PSMA3	2.39	2.04	1.74	4.35	0.41	0.23	TRUE	TRUE	FALSE	2
Q9Y3U8	RPL36 60S ribosomal protein L36	RPL36	2.2	2	1.73	0.21	0.12	1.73	TRUE	TRUE	FALSE	2
Q96K76	USP47 Ubiquitin carboxyl-terminal hydrolase 47	USP47	2.78	7.92	1.72	0.83	7.48	0.41	TRUE	TRUE	FALSE	2
O94915	FRYL Protein furry homolog-like	FRYL	2.42	2.79	1.72	0	0	0	TRUE	TRUE	FALSE	2
Q15291	RBBP5 Retinoblastoma-binding protein 5	RBBP5	2.03	2.39	1.72	0.27	0	0.19	TRUE	TRUE	FALSE	2
Q99567	NUP88 Nuclear pore complex protein Nup88	NUP88	3.41	2.27	1.72	5.41	5.72	0.76	TRUE	TRUE	FALSE	2
O00471	EXOC5 Exocyst complex component 5	EXOC5	2.24	2.61	1.68	0.33	1.41	0.38	TRUE	TRUE	FALSE	2
P25787	PSMA2 Proteasome subunit alpha type-2	PSMA2	2.93	3.21	1.65	1.02	1.27	5.85	TRUE	TRUE	FALSE	2
Q92896	GLG1 Golgi apparatus protein 1	GLG1	2	3.07	1.65	0.37	0	0.72	TRUE	TRUE	FALSE	2
P22307	SCP2 Non-specific lipid-transfer protein	SCP2	14.61	2.86	1.64	7.57	0	0	TRUE	TRUE	FALSE	2
Q9BY32	ITPA Inosine triphosphate pyrophosphatase	ITPA	3.19	2.34	1.64	0	0	0	TRUE	TRUE	FALSE	2
O43681	ASNA1 ATPase ASNA1	ASNA1	2.19	2.24	1.62	5.3	1.47	0.35	TRUE	TRUE	FALSE	2
Q16630	CPSF6 Cleavage and polyadenylation specificity factor su	CPSF6	3.17	2.13	1.59	0.78	0	0.53	TRUE	TRUE	FALSE	2
Q9H2G2	SLK STE20-like serine/threonine-protein kinase	SLK	3.39	2.58	1.58	3.82	3.49	0.71	TRUE	TRUE	FALSE	2
P35611	ADD1 Alpha-adducin	ADD1	4.13	8.52	1.57	0	9.16	0	TRUE	TRUE	FALSE	2
Q9Y2T2	AP3M1 AP-3 complex subunit mu-1	AP3M1	2.37	2.18	1.54	0.1	0.3	0.91	TRUE	TRUE	FALSE	2
P00918	CA2 Carbonic anhydrase 2	CA2	3.32	2.3	1.52	0	0.22	0.89	TRUE	TRUE	FALSE	2
P61923	COPZ1 Coatomer subunit zeta-1	COPZ1	2.14	2.02	1.48	0.24	0.21	0	TRUE	TRUE	FALSE	2
Q7KZ85	SUPT6H Transcription elongation factor SPT6	SUPT6H	3.17	2.22	1.45	0.78	0	0	TRUE	TRUE	FALSE	2
Q14676	MDC1 Mediator of DNA damage checkpoint protein 1	MDC1	4.81	2.13	1.44	0	0	0	TRUE	TRUE	FALSE	2
Q6L8Q7	PDE12 2,5-phosphodiesterase 12	PDE12	2.83	2.34	1.42	1.16	0	0.21	TRUE	TRUE	FALSE	2
O14732	IMPA2 Inositol monophosphatase 2	IMPA2	2.45	2.04	1.4	2.04	0.15	0.81	TRUE	TRUE	FALSE	2
Q96GX9	APIP Probable methylthioribulose-1-phosphate dehydratas	APIP	2.65	2.3	1.38	0	0	0	TRUE	TRUE	FALSE	2
Q9P287	BCCIP BRCA2 and CDKN1A-interacting protein	BCCIP	2.42	2.78	1.32	0.57	0.22	0	TRUE	TRUE	FALSE	2
P16144	ITGB4 Integrin beta-4	ITGB4	11.04	8.65	1.28	0	8.97	0	TRUE	TRUE	FALSE	2
P05161	ISG15 Ubiquitin-like protein ISG15	ISG15	3.13	4.27	1.28	1.16	2.91	0	TRUE	TRUE	FALSE	2
Q92817	EVPL Envoplakin	EVPL	15	15	1.25	0	0	0	TRUE	TRUE	FALSE	2
Q5JTV8	TOR1AIP1 Torsin-1A-interacting protein 1	TOR1AIP1	8.46	7.11	1.24	0	0	0	TRUE	TRUE	FALSE	2
Q13112	CHAF1B Chromatin assembly factor 1 subunit B	CHAF1B	3.77	2.02	1.22	0	0	0	TRUE	TRUE	FALSE	2
Q9Y248	GINS2 DNA replication complex GINS protein PSF2	GINS2	3.74	2.44	1.15	2.16	0	1.41	TRUE	TRUE	FALSE	2
P46939	UTRN Utrophin	UTRN	6.48	15	1.13	0	0	0	TRUE	TRUE	FALSE	2
Q9H8H0	NOL11 Nucleolar protein 11	NOL11	2.51	15	0.91	1.41	0	1.01	TRUE	TRUE	FALSE	2
Q96B97	SH3KBP1 SH3 domain-containing kinase-binding protein 1	SH3KBP1	15	2.99	0.53	5.71	0	0	TRUE	TRUE	FALSE	2
Q6P1J9	CDC73 Parafibromin	CDC73	2.5	2.2	0.53	4.06	0.51	0	TRUE	TRUE	FALSE	2
Q9NVN8	GNL3L Guanine nucleotide-binding protein-like 3-like pro	GNL3L	2.41	3.02	0.15	7.95	0	0	TRUE	TRUE	FALSE	2
Q14094	CCNI Cyclin-I	CCNI	15	15	0	0	0	0	TRUE	TRUE	FALSE	2
Q9UKM7	MAN1B1 Endoplasmic reticulum mannosyl-oligosaccharide 1,2	MAN1B1	15	15	0	0	0	0	TRUE	TRUE	FALSE	2
P20929	NEB Nebulin	NEB	7.95	15	0	0	0	0	TRUE	TRUE	FALSE	2
Q9UBC2	EPS15L1 Epidermal growth factor receptor substrate 15-like	EPS15L1	5.58	15	0	3.19	0	0	TRUE	TRUE	FALSE	2
Q9BZI7	UPF3B Regulator of nonsense transcripts 3B	UPF3B	4.62	15	0	1.15	0	0	TRUE	TRUE	FALSE	2
O75477	ERLIN1 Erlin-1	ERLIN1	3.03	15	0	1.43	0	0	TRUE	TRUE	FALSE	2
Q96CT7	CCDC124 Coiled-coil domain-containing protein 124	CCDC124	6.09	10.14	0	1.73	6.87	0	TRUE	TRUE	FALSE	2
Q9H814	PHAX Phosphorylated adapter RNA export protein	PHAX	7.11	9.17	0	2.23	8.24	0	TRUE	TRUE	FALSE	2
P29317	EPHA2 Ephrin type-A receptor 2	EPHA2	8.36	8.29	0	9.4	9.49	0	TRUE	TRUE	FALSE	2
Q9Y2R4	DDX52 Probable ATP-dependent RNA helicase DDX52	DDX52	2.59	8	0	0.62	9.91	0	TRUE	TRUE	FALSE	2
Q8IVL5	LEPREL1 Prolyl 3-hydroxylase 2	LEPREL1	3.17	7.13	0	0	0	0	TRUE	TRUE	FALSE	2
Q6UX04	CWC27 Peptidyl-prolyl cis-trans isomerase CWC27 homolog	CWC27	13.64	7.01	0	1.92	5.47	0	TRUE	TRUE	FALSE	2
O00505	KPNA3 Importin subunit alpha-3	KPNA3	2.65	6.84	0	0.62	4.77	0	TRUE	TRUE	FALSE	2
Q14696	MESDC2 LDLR chaperone MESD	MESDC2	6.2	5.58	0	0.41	2.96	0	TRUE	TRUE	FALSE	2
P67936	TPM4 Tropomyosin alpha-4 chain	TPM4	7.72	5.1	0	4.39	3.98	0	TRUE	TRUE	FALSE	2
Q7Z5L9	IRF2BP2 Interferon regulatory factor 2-binding protein 2	IRF2BP2	3.22	4.63	0	1	0	0	TRUE	TRUE	FALSE	2
P49753	ACOT2 Acyl-coenzyme A thioesterase 2, mitochondrial	ACOT2	2.97	4.36	0	7.38	0	0	TRUE	TRUE	FALSE	2
Q14257	RCN2 Reticulocalbin-2	RCN2	4.34	4.34	0	0	0	0	TRUE	TRUE	FALSE	2
P18887	XRCC1 DNA repair protein XRCC1	XRCC1	3.28	4.1	0	0	0	0	TRUE	TRUE	FALSE	2
Q9NZ63	C9orf78 Uncharacterized protein C9orf78	C9orf78	6.83	4.08	0	4.99	0	0	TRUE	TRUE	FALSE	2
Q7L5Y1	ENOSF1 Mitochondrial enolase superfamily member 1	ENOSF1	3.96	3.87	0	1.47	0	0	TRUE	TRUE	FALSE	2
Q8NEF9	SRFBP1 Serum response factor-binding protein 1	SRFBP1	15	3.78	0	0	0	0	TRUE	TRUE	FALSE	2
Q92665	MRPS31 28S ribosomal protein S31, mitochondrial	MRPS31	3.88	3.74	0	1.46	0	0	TRUE	TRUE	FALSE	2
Q8IWZ8	SUGP1 SURP and G-patch domain-containing protein 1	SUGP1	6.28	3.7	0	0	0	0	TRUE	TRUE	FALSE	2
Q5T1M5	FKBP15 FK506-binding protein 15	FKBP15	5.17	3.64	0	0.64	0	0	TRUE	TRUE	FALSE	2
Q15642	TRIP10 Cdc42-interacting protein 4	TRIP10	15	3.62	0	0	6.89	0	TRUE	TRUE	FALSE	2
Q86V48	LUZP1 Leucine zipper protein 1	LUZP1	2.55	3.62	0	1.14	0	0	TRUE	TRUE	FALSE	2
Q5JPH6	EARS2 Probable glutamate--tRNA ligase, mitochondrial	EARS2	4.87	3.57	0	0	1.29	0	TRUE	TRUE	FALSE	2
Q13188	STK3 Serine/threonine-protein kinase 3	STK3	3.27	3.5	0	0	0	0	TRUE	TRUE	FALSE	2
Q15172	PPP2R5A Serine/threonine-protein phosphatase 2A 56 kDa reg	PPP2R5A	3.29	3.49	0	0	0	0	TRUE	TRUE	FALSE	2
P13984	GTF2F2 General transcription factor IIF subunit 2	GTF2F2	5.25	3.4	0	4.52	2.74	0	TRUE	TRUE	FALSE	2
Q9BZX2	UCK2 Uridine-cytidine kinase 2	UCK2	3.98	3.32	0	0.56	0	0	TRUE	TRUE	FALSE	2
Q14554	PDIA5 Protein disulfide-isomerase A5	PDIA5	4.24	3.22	0	0	0.28	0	TRUE	TRUE	FALSE	2
O43765	SGTA Small glutamine-rich tetratricopeptide repeat-cont	SGTA	5.94	3.12	0	4.06	0.66	0	TRUE	TRUE	FALSE	2
Q9UBS4	DNAJB11 DnaJ homolog subfamily B member 11	DNAJB11	4.1	3.11	0	0.88	0	0	TRUE	TRUE	FALSE	2
Q12972	PPP1R8 Nuclear inhibitor of protein phosphatase 1	PPP1R8	3.21	3.07	0	1.29	0	0	TRUE	TRUE	FALSE	2
P00568	AK1 Adenylate kinase isoenzyme 1	AK1	5.87	3.06	0	3.98	0	0	TRUE	TRUE	FALSE	2
Q8WXA9	SREK1 Splicing regulatory glutamine/lysine-rich protein	SREK1	4.82	3.03	0	0	0	0	TRUE	TRUE	FALSE	2
O43670	ZNF207 Zinc finger protein 207	ZNF207	3.68	3.02	0	0.33	1.93	0	TRUE	TRUE	FALSE	2
O75391	SPAG7 Sperm-associated antigen 7	SPAG7	7.75	2.95	0	0	0	0	TRUE	TRUE	FALSE	2
Q9Y3A3	MOB4 MOB-like protein phocein	MOB4	5.07	2.82	0	0	0.36	0	TRUE	TRUE	FALSE	2
Q9NPD8	UBE2T Ubiquitin-conjugating enzyme E2 T	UBE2T	4.74	2.8	0	0	0	0	TRUE	TRUE	FALSE	2
O43169	CYB5B Cytochrome b5 type B	CYB5B	2.88	2.77	0	0	0.66	0	TRUE	TRUE	FALSE	2
O75828	CBR3 Carbonyl reductase	CBR3	3.45	2.76	0	0.37	0.52	0	TRUE	TRUE	FALSE	2
O00629	KPNA4 Importin subunit alpha-4	KPNA4	9.77	2.73	0	7.4	0.74	0	TRUE	TRUE	FALSE	2
H7C469	Uncharacterized protein	Uncharacterized	3.22	2.71	0	4.31	0.69	0	TRUE	TRUE	FALSE	2
Q9BTT0	ANP32E Acidic leucine-rich nuclear phosphoprotein 32 fami	ANP32E	2.13	2.53	0	0.67	0.33	0	TRUE	TRUE	FALSE	2
Q68CZ6	HAUS3 HAUS augmin-like complex subunit 3	HAUS3	3.1	2.49	0	0	0	0	TRUE	TRUE	FALSE	2
P62857	RPS28 40S ribosomal protein S28	RPS28	4.35	2.47	0	0	0.21	0	TRUE	TRUE	FALSE	2
Q8WXF1	PSPC1 Paraspeckle component 1	PSPC1	4.11	2.44	0	0	2.18	0	TRUE	TRUE	FALSE	2
P13796	LCP1 Plastin-2	LCP1	2.71	2.38	0	3.07	0.32	0	TRUE	TRUE	FALSE	2
Q9UQ16	DNM3 Dynamin-3	DNM3	2.3	2.37	0	0	0.43	0	TRUE	TRUE	FALSE	2
Q9Y3C8	UFC1 Ubiquitin-fold modifier-conjugating enzyme 1	UFC1	3.66	2.36	0	1.34	0.37	0	TRUE	TRUE	FALSE	2
Q9Y639	NPTN Neuroplastin	NPTN	2.69	2.33	0	0	7.34	0	TRUE	TRUE	FALSE	2
Q8TD16	BICD2 Protein bicaudal D homolog 2	BICD2	2.69	2.27	0	7.45	0	0	TRUE	TRUE	FALSE	2
O00273	DFFA DNA fragmentation factor subunit alpha	DFFA	3.11	2.25	0	0	0	0	TRUE	TRUE	FALSE	2
P46199	MTIF2 Translation initiation factor IF-2, mitochondrial	MTIF2	5.33	2.24	0	0	0	0	TRUE	TRUE	FALSE	2
O94804	STK10 Serine/threonine-protein kinase 10	STK10	15	2.19	0	0	0	0	TRUE	TRUE	FALSE	2
Q9H078	CLPB Caseinolytic peptidase B protein homolog	CLPB	3.32	2.18	0	0	0	0	TRUE	TRUE	FALSE	2
Q16775	HAGH Hydroxyacylglutathione hydrolase, mitochondrial	HAGH	2.37	2.18	0	2.8	2.25	0	TRUE	TRUE	FALSE	2
Q96GC5	MRPL48 39S ribosomal protein L48, mitochondrial	MRPL48	2.66	2.17	0	0.4	0	0	TRUE	TRUE	FALSE	2
Q7KZI7	MARK2 Serine/threonine-protein kinase MARK2	MARK2	2.46	2.12	0	1.94	0.49	0	TRUE	TRUE	FALSE	2
Q9HA64	FN3KRP Ketosamine-3-kinase	FN3KRP	6.68	2.09	0	0	0.16	0	TRUE	TRUE	FALSE	2
Q7L9L4	MOB1B MOB kinase activator 1B	MOB1B	2.85	2.07	0	0	0.01	0	TRUE	TRUE	FALSE	2
Q14318	FKBP8 Peptidyl-prolyl cis-trans isomerase FKBP8	FKBP8	1.85	1.7	15	0	0	0	FALSE	FALSE	TRUE	1
Q9H6S0	YTHDC2 Probable ATP-dependent RNA helicase YTHDC2	YTHDC2	1.56	0.44	15	0.27	0	7.95	FALSE	FALSE	TRUE	1
O14578	CIT Citron Rho-interacting kinase	CIT	0	0	15	0	0	0	FALSE	FALSE	TRUE	1
O95067	CCNB2 G2/mitotic-specific cyclin-B2	CCNB2	0	0	15	0	0	0	FALSE	FALSE	TRUE	1
P05067	APP Amyloid beta A4 protein	APP	0	0	15	0	0	0	FALSE	FALSE	TRUE	1
P30038	ALDH4A1 Delta-1-pyrroline-5-carboxylate dehydrogenase, mit	ALDH4A1	0	0	15	0	0	0	FALSE	FALSE	TRUE	1
P49821	NDUFV1 NADH dehydrogenase	NDUFV1	0	0	15	0	0	0	FALSE	FALSE	TRUE	1
P56945	BCAR1 Breast cancer anti-estrogen resistance protein 1	BCAR1	0	0	15	0	0	0	FALSE	FALSE	TRUE	1
P82664	MRPS10 28S ribosomal protein S10, mitochondrial	MRPS10	0	0	15	0	0	0	FALSE	FALSE	TRUE	1
Q13163	MAP2K5 Dual specificity mitogen-activated protein kinase	MAP2K5	0	0	15	0	0	0	FALSE	FALSE	TRUE	1
Q14119	VEZF1 Vascular endothelial zinc finger 1	VEZF1	0	0	15	0	0	0	FALSE	FALSE	TRUE	1
Q15650	TRIP4 Activating signal cointegrator 1	TRIP4	0	0	15	0	0	0	FALSE	FALSE	TRUE	1
Q16134	ETFDH Electron transfer flavoprotein-ubiquinone oxidored	ETFDH	0	0	15	0	0	0	FALSE	FALSE	TRUE	1
Q2NKX8	ERCC6L DNA excision repair protein ERCC-6-like	ERCC6L	0	0	15	0	0	0	FALSE	FALSE	TRUE	1
Q5VZK9	LRRC16A Leucine-rich repeat-containing protein 16A	LRRC16A	0	0	15	0	0	0	FALSE	FALSE	TRUE	1
Q86X10	RALGAPB Ral GTPase-activating protein subunit beta	RALGAPB	0	0	15	0	0	0	FALSE	FALSE	TRUE	1
Q8IVD9	NUDCD3 NudC domain-containing protein 3	NUDCD3	0	0	15	0	0	0	FALSE	FALSE	TRUE	1
Q8IX03	WWC1 Protein KIBRA	WWC1	0	0	15	0	0	0	FALSE	FALSE	TRUE	1
Q8IZW8	TNS4 Tensin-4	TNS4	0	0	15	0	0	0	FALSE	FALSE	TRUE	1
Q8TCU4	ALMS1 Alstrom syndrome protein 1	ALMS1	0	0	15	0	0	0	FALSE	FALSE	TRUE	1
Q92542	NCSTN Nicastrin	NCSTN	0	0	15	0	0	0	FALSE	FALSE	TRUE	1
Q969J3	LOH12CR1 Loss of heterozygosity 12 chromosomal region 1 pro	LOH12CR1	0	0	15	0	0	0	FALSE	FALSE	TRUE	1
Q96ME1	FBXL18 F-box/LRR-repeat protein 18	FBXL18	0	0	15	0	0	0	FALSE	FALSE	TRUE	1
Q96PE2	ARHGEF17 Rho guanine nucleotide exchange factor 17	ARHGEF17	0	0	15	0	0	0	FALSE	FALSE	TRUE	1
Q96RU3	FNBP1 Formin-binding protein 1	FNBP1	0	0	15	0	0	0	FALSE	FALSE	TRUE	1
Q9HAQ2	KIF9 Kinesin-like protein KIF9	KIF9	0	0	15	0	0	0	FALSE	FALSE	TRUE	1
Q9NZ09	UBAP1 Ubiquitin-associated protein 1	UBAP1	0	0	15	0	0	0	FALSE	FALSE	TRUE	1
Q9UPN6	SCAF8 Protein SCAF8	SCAF8	0	0	15	0	0	0	FALSE	FALSE	TRUE	1
Q9Y3M8	STARD13 StAR-related lipid transfer protein 13	STARD13	0	0	15	0	0	0	FALSE	FALSE	TRUE	1
Reverse_O43424	GRID2 Glutamate receptor delta-2 subunit	GRID2	0	0	15	0	0	0	FALSE	FALSE	TRUE	1
Reverse_P01008	SERPINC1 Antithrombin-III	SERPINC1	0	0	15	0	0	0	FALSE	FALSE	TRUE	1
Reverse_P54802	NAGLU Alpha-N-acetylglucosaminidase	NAGLU	0	0	15	0	0	0	FALSE	FALSE	TRUE	1
Reverse_P62879	GNB2 Guanine nucleotide-binding protein G(I)/G(S)/G(T)	GNB2	0	0	15	0	0	0	FALSE	FALSE	TRUE	1
Reverse_Q14152	EIF3A Eukaryotic translation initiation factor 3 subunit	EIF3A	0	0	15	0	0	0	FALSE	FALSE	TRUE	1
Reverse_Q15678	PTPN14 Tyrosine-protein phosphatase non-receptor type 14	PTPN14	0	0	15	0	0	0	FALSE	FALSE	TRUE	1
Reverse_Q6IWH7	ANO7 Anoctamin-7	ANO7	0	0	15	0	0	0	FALSE	FALSE	TRUE	1
Reverse_Q6ZNH5	ZNF497 Zinc finger protein 497	ZNF497	0	0	15	0	0	0	FALSE	FALSE	TRUE	1
Reverse_Q96JM2	ZNF462 Zinc finger protein 462	ZNF462	0	0	15	0	0	0	FALSE	FALSE	TRUE	1
Reverse_Q9HAV0	GNB4 Guanine nucleotide-binding protein subunit beta-4	GNB4	0	0	15	0	0	0	FALSE	FALSE	TRUE	1
Reverse_Q9UKK3	PARP4 Poly	PARP4	0	0	15	0	0	0	FALSE	FALSE	TRUE	1
Q969V6	MKL1 MKL/myocardin-like protein 1	MKL1	0	0	13.42	0	0	0	FALSE	FALSE	TRUE	1
Reverse_O60687	SRPX2 Sushi repeat-containing protein SRPX2	SRPX2	0	0	12.51	0	0	0	FALSE	FALSE	TRUE	1
Reverse_Q6UXH8	CCBE1 Collagen and calcium-binding EGF domain-containing	CCBE1	0	0	12.03	0	0	4.21	FALSE	FALSE	TRUE	1
O95786	DDX58 Probable ATP-dependent RNA helicase DDX58	DDX58	1.67	0	12	0	0	0	FALSE	FALSE	TRUE	1
Q9UQR1	ZNF148 Zinc finger protein 148	ZNF148	0	0	10.89	0	0	0	FALSE	FALSE	TRUE	1
Q14669	TRIP12 E3 ubiquitin-protein ligase TRIP12	TRIP12	1.54	1.78	10.88	0.33	0	0	FALSE	FALSE	TRUE	1
Q4LE39	ARID4B AT-rich interactive domain-containing protein 4B	ARID4B	0	0	10.51	0	0	6.35	FALSE	FALSE	TRUE	1
Q9UQN3	CHMP2B Charged multivesicular body protein 2b	CHMP2B	0	0	10.19	0	0	6.8	FALSE	FALSE	TRUE	1
Q00403	GTF2B Transcription initiation factor IIB	GTF2B	0	0	9.52	0	0	6.55	FALSE	FALSE	TRUE	1
P13716	ALAD Delta-aminolevulinic acid dehydratase	ALAD	0	0	9.14	0	0	0	FALSE	FALSE	TRUE	1
Q9Y3C1	NOP16 Nucleolar protein 16	NOP16	0	0	8.94	0	0	8.58	FALSE	FALSE	TRUE	1
Q9Y217	MTMR6 Myotubularin-related protein 6	MTMR6	0	0	8.84	0	0	8.72	FALSE	FALSE	TRUE	1
Q9NWB1	RBFOX1 RNA binding protein fox-1 homolog 1	RBFOX1	0	0	8.72	0	0	8.87	FALSE	FALSE	TRUE	1
Q8NFH5	NUP35 Nucleoporin NUP53	NUP35	0	0	8.61	0	0	6.94	FALSE	FALSE	TRUE	1
Q8N556	AFAP1 Actin filament-associated protein 1	AFAP1	0	0	8.59	0	0	9.07	FALSE	FALSE	TRUE	1
Q06413	MEF2C Myocyte-specific enhancer factor 2C	MEF2C	0	0	8.47	0	0	9.23	FALSE	FALSE	TRUE	1
P14373	TRIM27 Zinc finger protein RFP	TRIM27	0	0	8.34	0	0	0	FALSE	FALSE	TRUE	1
Q96JG6	CCDC132 Coiled-coil domain-containing protein 132	CCDC132	0	0	8.33	0	0	0	FALSE	FALSE	TRUE	1
Q15833	STXBP2 Syntaxin-binding protein 2	STXBP2	0	0	8.3	0	0	9.47	FALSE	FALSE	TRUE	1
Q00534	CDK6 Cyclin-dependent kinase 6	CDK6	1.16	0	8.19	0.81	0	9.64	FALSE	FALSE	TRUE	1
Q86VN1	VPS36 Vacuolar protein-sorting-associated protein 36	VPS36	1.91	0	7.86	0.66	0	10.1	FALSE	FALSE	TRUE	1
Q56VL3	OCIAD2 OCIA domain-containing protein 2	OCIAD2	0	0	7.86	0	0	7.68	FALSE	FALSE	TRUE	1
Q13948	CUX1 Protein CASP	CUX1	0	0	7.63	0	0	0	FALSE	FALSE	TRUE	1
O60504	SORBS3 Vinexin	SORBS3	0	0	7.6	0	0	10.47	FALSE	FALSE	TRUE	1
Q6I9Y2	THOC7 THO complex subunit 7 homolog	THOC7	0	0	7.54	0	0	0	FALSE	FALSE	TRUE	1
Q5T0F9	CC2D1B Coiled-coil and C2 domain-containing protein 1B	CC2D1B	0	0	6.88	0	0	0	FALSE	FALSE	TRUE	1
O00443	PIK3C2A Phosphatidylinositol 4-phosphate 3-kinase C2 domai	PIK3C2A	0	0	6.85	0	0	0	FALSE	FALSE	TRUE	1
Q96JB2	COG3 Conserved oligomeric Golgi complex subunit 3	COG3	0	0	6.82	0	0	7.17	FALSE	FALSE	TRUE	1
Q92805	GOLGA1 Golgin subfamily A member 1	GOLGA1	0	0	6.53	0	0	0	FALSE	FALSE	TRUE	1
Q8WWI1	LMO7 LIM domain only protein 7	LMO7	0	0	6.51	0	0	0	FALSE	FALSE	TRUE	1
Q86VW0	SESTD1 SEC14 domain and spectrin repeat-containing protei	SESTD1	0	0	6.39	0	0	0	FALSE	FALSE	TRUE	1
Q96CV9	OPTN Optineurin	OPTN	0	0	6.25	0	0	0	FALSE	FALSE	TRUE	1
Q6Y7W6	GIGYF2 PERQ amino acid-rich with GYF domain-containing pr	GIGYF2	0	0	6.19	0	0	0	FALSE	FALSE	TRUE	1
P62942	FKBP1A Peptidyl-prolyl cis-trans isomerase FKBP1A	FKBP1A	1.67	0	5.96	0	0	3.63	FALSE	FALSE	TRUE	1
Q13426	XRCC4 DNA repair protein XRCC4	XRCC4	0	0	5.78	0	0	0.33	FALSE	FALSE	TRUE	1
Q8N9N7	LRRC57 Leucine-rich repeat-containing protein 57	LRRC57	0	0	5.75	0	0	4.13	FALSE	FALSE	TRUE	1
Q12965	MYO1E Unconventional myosin-Ie	MYO1E	1.18	0.83	5.6	0	0	0	FALSE	FALSE	TRUE	1
P61916	NPC2 Epididymal secretory protein E1	NPC2	0	0	5.54	0	0	0	FALSE	FALSE	TRUE	1
Q8TAE8	GADD45GIP1 Growth arrest and DNA damage-inducible proteins-in	GADD45GIP1	0	0	5.51	0	0	0	FALSE	FALSE	TRUE	1
O00264	PGRMC1 Membrane-associated progesterone receptor componen	PGRMC1	0	0	5.5	0	0	0	FALSE	FALSE	TRUE	1
Q9BW19	KIFC1 Kinesin-like protein KIFC1	KIFC1	0	0	5.5	0	0	0	FALSE	FALSE	TRUE	1
Q96A35	MRPL24 39S ribosomal protein L24, mitochondrial	MRPL24	0	0	5.45	0	0	4.5	FALSE	FALSE	TRUE	1
P07311	ACYP1 Acylphosphatase-1	ACYP1	0	0	5.25	0	0	2.62	FALSE	FALSE	TRUE	1
Q71RC2	LARP4 La-related protein 4	LARP4	1.92	0	5.19	2.6	0	0	FALSE	FALSE	TRUE	1
Q9NWY4	C4orf27 UPF0609 protein C4orf27	C4orf27	0.53	0	5.19	0	0	0	FALSE	FALSE	TRUE	1
P55327	TPD52 Tumor protein D52	TPD52	0	0	5.09	0	0	0	FALSE	FALSE	TRUE	1
Q9NVM9	Asun Protein asunder homolog	Asun	0	0.09	5.06	0	0	0.92	FALSE	FALSE	TRUE	1
Q9H1Y0	ATG5 Autophagy protein 5	ATG5	0	0	4.96	0	0	4.14	FALSE	FALSE	TRUE	1
Q9H4L5	OSBPL3 Oxysterol-binding protein-related protein 3	OSBPL3	0.88	0	4.75	0	0	2.23	FALSE	FALSE	TRUE	1
P31749	AKT1 RAC-alpha serine/threonine-protein kinase	AKT1	0	0	4.7	0	0	0	FALSE	FALSE	TRUE	1
O95140	MFN2 Mitofusin-2	MFN2	0	0	4.66	0	0	0	FALSE	FALSE	TRUE	1
A2BFH1	PPIAL4G Peptidyl-prolyl cis-trans isomerase A-like 4G	PPIAL4G	0	0	4.61	0	0	2.28	FALSE	FALSE	TRUE	1
Q9NNW7	TXNRD2 Thioredoxin reductase 2, mitochondrial	TXNRD2	0	1.8	4.49	0	0	4.5	FALSE	FALSE	TRUE	1
O15541	RNF113A RING finger protein 113A	RNF113A	0	0	4.48	0	0	0	FALSE	FALSE	TRUE	1
Q9UIG0	BAZ1B Tyrosine-protein kinase BAZ1B	BAZ1B	1.96	1.65	4.34	0.4	0.08	3.3	FALSE	FALSE	TRUE	1
Q9NR09	BIRC6 Baculoviral IAP repeat-containing protein 6	BIRC6	1.38	0	4.34	0.15	0	0	FALSE	FALSE	TRUE	1
Q9UGN5	PARP2 Poly	PARP2	0	0	4.25	0	0	2.66	FALSE	FALSE	TRUE	1
O95081	AGFG2 Arf-GAP domain and FG repeat-containing protein 2	AGFG2	0	0	4.05	0	0	0	FALSE	FALSE	TRUE	1
Q9ULD2	MTUS1 Microtubule-associated tumor suppressor 1	MTUS1	0	0	4	0	0	0	FALSE	FALSE	TRUE	1
Q03013	GSTM4 Glutathione S-transferase Mu 4	GSTM4	0	0	3.99	0	0	0	FALSE	FALSE	TRUE	1
Q9BZQ8	FAM129A Protein Niban	FAM129A	0	0	3.94	0	0	0	FALSE	FALSE	TRUE	1
P09110	ACAA1 3-ketoacyl-CoA thiolase, peroxisomal	ACAA1	1.82	0	3.83	0	0	0.52	FALSE	FALSE	TRUE	1
Q9UJC3	HOOK1 Protein Hook homolog 1	HOOK1	0	0	3.8	0	0	0	FALSE	FALSE	TRUE	1
Q7L592	C2orf56 Protein midA homolog, mitochondrial	C2orf56	0	0	3.74	0	0	0	FALSE	FALSE	TRUE	1
Q99747	NAPG Gamma-soluble NSF attachment protein	NAPG	0	0	3.73	0	0	0	FALSE	FALSE	TRUE	1
O75674	TOM1L1 TOM1-like protein 1	TOM1L1	0	0	3.66	0	0	0	FALSE	FALSE	TRUE	1
O96000	NDUFB10 NADH dehydrogenase	NDUFB10	0	1.51	3.65	0	0	0	FALSE	FALSE	TRUE	1
Q9NWS0	PIH1D1 PIH1 domain-containing protein 1	PIH1D1	0	0	3.61	0	0	0	FALSE	FALSE	TRUE	1
O60294	LCMT2 Leucine carboxyl methyltransferase 2	LCMT2	0	1.11	3.6	0	0	2.98	FALSE	FALSE	TRUE	1
Q8N6T3	ARFGAP1 ADP-ribosylation factor GTPase-activating protein	ARFGAP1	0	1.73	3.58	0	0	0	FALSE	FALSE	TRUE	1
P13995	MTHFD2 Bifunctional methylenetetrahydrofolate dehydrogena	MTHFD2	0	0.88	3.57	0	0	0.34	FALSE	FALSE	TRUE	1
Q8TED1	GPX8 Probable glutathione peroxidase 8	GPX8	0	0	3.55	0	0	0	FALSE	FALSE	TRUE	1
P25054	APC Adenomatous polyposis coli protein	APC	0	0	3.53	0	0	0	FALSE	FALSE	TRUE	1
Q6P1N9	TATDN1 Putative deoxyribonuclease TATDN1	TATDN1	0	0	3.51	0	0	0	FALSE	FALSE	TRUE	1
Q9BVM2	DPCD Protein DPCD	DPCD	0	0	3.47	0	0	0.51	FALSE	FALSE	TRUE	1
Q9H1B7	IRF2BPL Interferon regulatory factor 2-binding protein-lik	IRF2BPL	0	0	3.44	0	0	0.16	FALSE	FALSE	TRUE	1
Q9BPX6	MICU1 Calcium uptake protein 1, mitochondrial	MICU1	0	0	3.42	0	0	0	FALSE	FALSE	TRUE	1
Q86UP8	GTF2IRD2 General transcription factor II-I repeat domain-co	GTF2IRD2	0	0	3.4	0	0	0	FALSE	FALSE	TRUE	1
Q13356	PPIL2 Peptidyl-prolyl cis-trans isomerase-like 2	PPIL2	0	0	3.39	0	0	0	FALSE	FALSE	TRUE	1
O96028	WHSC1 Probable histone-lysine N-methyltransferase NSD2	WHSC1	0	0	3.38	0	0	0	FALSE	FALSE	TRUE	1
Q96C01	FAM136A Protein FAM136A	FAM136A	0	0	3.32	0	0	0	FALSE	FALSE	TRUE	1
Q13153	PAK1 Serine/threonine-protein kinase PAK 1	PAK1	0	0	3.32	0	0	0.55	FALSE	FALSE	TRUE	1
P31483	TIA1 Nucleolysin TIA-1 isoform p40	TIA1	0	0	3.32	0	0	0.82	FALSE	FALSE	TRUE	1
Q86X83	COMMD2 COMM domain-containing protein 2	COMMD2	0	0	3.3	0	0	0	FALSE	FALSE	TRUE	1
O95263	PDE8B High affinity cAMP-specific and IBMX-insensitive 3	PDE8B	0	0	3.27	0	0	0	FALSE	FALSE	TRUE	1
P24666	ACP1 Low molecular weight phosphotyrosine protein phosp	ACP1	0	0	3.26	0	0	1.57	FALSE	FALSE	TRUE	1
Q8WZ82	OVCA2 Ovarian cancer-associated gene 2 protein	OVCA2	0	0	3.25	0	0	1.76	FALSE	FALSE	TRUE	1
Q9NP77	SSU72 RNA polymerase II subunit A C-terminal domain phos	SSU72	0	0	3.2	0	0	0	FALSE	FALSE	TRUE	1
P24844	MYL9 Myosin regulatory light polypeptide 9	MYL9	0	1.99	3.15	0	0	7.2	FALSE	FALSE	TRUE	1
Q9BUT1	BDH2 3-hydroxybutyrate dehydrogenase type 2	BDH2	0	1.89	3.14	0	0	1.7	FALSE	FALSE	TRUE	1
O43572	AKAP10 A-kinase anchor protein 10, mitochondrial	AKAP10	0	0	3.13	0	0	0	FALSE	FALSE	TRUE	1
Q9UGM6	WARS2 Tryptophan--tRNA ligase, mitochondrial	WARS2	0	0	3.12	0	0	1.57	FALSE	FALSE	TRUE	1
O43318	MAP3K7 Mitogen-activated protein kinase kinase kinase 7	MAP3K7	0	0	3.11	0	0	0	FALSE	FALSE	TRUE	1
Reverse_Q8WXH0	SYNE2 Nesprin-2	SYNE2	0	0	3.11	0	0	0	FALSE	FALSE	TRUE	1
Q92576	PHF3 PHD finger protein 3	PHF3	0	0	3.1	0	0	0	FALSE	FALSE	TRUE	1
P51970	NDUFA8 NADH dehydrogenase	NDUFA8	0	0	3.1	0	0	0.23	FALSE	FALSE	TRUE	1
Q7LBR1	CHMP1B Charged multivesicular body protein 1b	CHMP1B	0	0	3.09	0	0	0.54	FALSE	FALSE	TRUE	1
P52756	RBM5 RNA-binding protein 5	RBM5	0	0	3.07	0	0	0	FALSE	FALSE	TRUE	1
Q96BJ3	AIDA Axin interactor, dorsalization-associated protein	AIDA	0	0	3.04	0	0	0	FALSE	FALSE	TRUE	1
Q92889	ERCC4 DNA repair endonuclease XPF	ERCC4	0	0	3.03	0	0	0	FALSE	FALSE	TRUE	1
Q96A49	SYAP1 Synapse-associated protein 1	SYAP1	0	1.79	3	0	0	0.5	FALSE	FALSE	TRUE	1
Q32P44	EML3 Echinoderm microtubule-associated protein-like 3	EML3	0	0	3	0	0	0	FALSE	FALSE	TRUE	1
Q15043	SLC39A14 Zinc transporter ZIP14	SLC39A14	1.58	1.96	2.98	0.12	0.71	0	FALSE	FALSE	TRUE	1
O60333	KIF1B Kinesin-like protein KIF1B	KIF1B	0	0	2.98	0	0	0	FALSE	FALSE	TRUE	1
Q9H8H2	DDX31 Probable ATP-dependent RNA helicase DDX31	DDX31	1.96	0	2.97	0.4	0	1.53	FALSE	FALSE	TRUE	1
P48506	GCLC Glutamate--cysteine ligase catalytic subunit	GCLC	1.83	1.8	2.96	3.38	0.51	2.26	FALSE	FALSE	TRUE	1
P25098	ADRBK1 Beta-adrenergic receptor kinase 1	ADRBK1	0	0	2.95	0	0	1.46	FALSE	FALSE	TRUE	1
Q9UK59	DBR1 Lariat debranching enzyme	DBR1	1.54	0	2.91	0	0	0	FALSE	FALSE	TRUE	1
O15530	PDPK1 3-phosphoinositide-dependent protein kinase 1	PDPK1	0.95	0	2.9	0	0	0	FALSE	FALSE	TRUE	1
P53602	MVD Diphosphomevalonate decarboxylase	MVD	0	0	2.9	0	0	0	FALSE	FALSE	TRUE	1
P82673	MRPS35 28S ribosomal protein S35, mitochondrial	MRPS35	0	0	2.89	0	0	0.55	FALSE	FALSE	TRUE	1
Q8TB22	SPATA20 Spermatogenesis-associated protein 20	SPATA20	0	0	2.86	0	0	0	FALSE	FALSE	TRUE	1
P15104	GLUL Glutamine synthetase	GLUL	1.25	1.8	2.85	0	0	0	FALSE	FALSE	TRUE	1
P16278	GLB1 Beta-galactosidase	GLB1	0	1.44	2.85	0	0	0	FALSE	FALSE	TRUE	1
Q9BTA9	WAC WW domain-containing adapter protein with coiled-c	WAC	0	0	2.84	0	0	0	FALSE	FALSE	TRUE	1
O14497	ARID1A AT-rich interactive domain-containing protein 1A	ARID1A	0	0	2.81	0	0	0.49	FALSE	FALSE	TRUE	1
Q5SW79	CEP170 Centrosomal protein of 170 kDa	CEP170	1.75	1.7	2.8	1.34	0	1.86	FALSE	FALSE	TRUE	1
Q8N4N8	KIF2B Kinesin-like protein KIF2B	KIF2B	0	0	2.8	0	0	0	FALSE	FALSE	TRUE	1
Q9H0R5	GBP3 Guanylate-binding protein 3	GBP3	0	0	2.79	0	0	1.15	FALSE	FALSE	TRUE	1
Q92626	PXDN Peroxidasin homolog	PXDN	0	0	2.78	0	0	0	FALSE	FALSE	TRUE	1
Q68CZ2	TNS3 Tensin-3	TNS3	1.86	0	2.75	0.79	0	1.3	FALSE	FALSE	TRUE	1
Q92930	RAB8B Ras-related protein Rab-8B	RAB8B	0	0	2.75	0	0	0.15	FALSE	FALSE	TRUE	1
Q9NPJ6	MED4 Mediator of RNA polymerase II transcription subuni	MED4	0	0	2.75	0	0	0.98	FALSE	FALSE	TRUE	1
Q53SF7	COBLL1 Cordon-bleu protein-like 1	COBLL1	0	0	2.73	0	0	0	FALSE	FALSE	TRUE	1
Q7Z4G4	TRMT11 tRNA (guanine(10)-N2)-methyltransferase homolog	TRMT11	0	0	2.73	0	0	0.45	FALSE	FALSE	TRUE	1
Q76FK4	NOL8 Nucleolar protein 8	NOL8	0	0	2.71	0	0	0	FALSE	FALSE	TRUE	1
Q99985	SEMA3C Semaphorin-3C	SEMA3C	0	0	2.71	0	0	0	FALSE	FALSE	TRUE	1
P53597	SUCLG1 Succinyl-CoA ligase	SUCLG1	1.67	1.66	2.7	2	0.79	5.59	FALSE	FALSE	TRUE	1
O60907	TBL1X F-box-like/WD repeat-containing protein TBL1X	TBL1X	0	0	2.68	0	0	0.38	FALSE	FALSE	TRUE	1
Q96KG9	SCYL1 N-terminal kinase-like protein	SCYL1	0	0	2.67	0	0	0	FALSE	FALSE	TRUE	1
Q92547	TOPBP1 DNA topoisomerase 2-binding protein 1	TOPBP1	0	0	2.66	0	0	0	FALSE	FALSE	TRUE	1
Q13191	CBLB E3 ubiquitin-protein ligase CBL-B	CBLB	0	0	2.65	0	0	0	FALSE	FALSE	TRUE	1
Q96SW2	CRBN Protein cereblon	CRBN	0	0	2.64	0	0	0	FALSE	FALSE	TRUE	1
Q9H9B1	EHMT1 Histone-lysine N-methyltransferase EHMT1	EHMT1	0	0	2.64	0	0	0.01	FALSE	FALSE	TRUE	1
Q15067	ACOX1 Peroxisomal acyl-coenzyme A oxidase 1	ACOX1	1.66	0	2.63	0.56	0	0	FALSE	FALSE	TRUE	1
P16930	FAH Fumarylacetoacetase	FAH	0	0	2.62	0	0	0	FALSE	FALSE	TRUE	1
Q15059	BRD3 Bromodomain-containing protein 3	BRD3	0	0	2.61	0	0	0	FALSE	FALSE	TRUE	1
P85037	FOXK1 Forkhead box protein K1	FOXK1	0	0	2.59	0	0	0.27	FALSE	FALSE	TRUE	1
Q96I51	WBSCR16 Williams-Beuren syndrome chromosomal region 16 pro	WBSCR16	1.6	0	2.52	0	0	0	FALSE	FALSE	TRUE	1
Q9H1H9	KIF13A Kinesin-like protein KIF13A	KIF13A	0	0	2.52	0	0	0.09	FALSE	FALSE	TRUE	1
P49916	LIG3 DNA ligase 3	LIG3	0	0.98	2.51	0	0	0	FALSE	FALSE	TRUE	1
Q96FJ2	DYNLL2 Dynein light chain 2, cytoplasmic	DYNLL2	0	0	2.51	0	0	0.37	FALSE	FALSE	TRUE	1
Q86XZ4	SPATS2 Spermatogenesis-associated serine-rich protein 2	SPATS2	0	1.72	2.48	0	1.39	0.47	FALSE	FALSE	TRUE	1
Q96J01	THOC3 THO complex subunit 3	THOC3	0	0	2.47	0	0	0.19	FALSE	FALSE	TRUE	1
Q9UBL3	ASH2L Set1/Ash2 histone methyltransferase complex subuni	ASH2L	1.84	0	2.46	0	0	0.64	FALSE	FALSE	TRUE	1
A3KMH1	VWA8 von Willebrand factor A domain-containing protein	VWA8	0	0	2.45	0	0	0	FALSE	FALSE	TRUE	1
Q9HAN9	NMNAT1 Nicotinamide mononucleotide adenylyltransferase 1	NMNAT1	0	0	2.45	0	0	0	FALSE	FALSE	TRUE	1
P02795	MT2A Metallothionein-2	MT2A	0	0	2.44	0	0	0.01	FALSE	FALSE	TRUE	1
P13640	MT1G Metallothionein-1G	MT1G	0	0	2.44	0	0	0.01	FALSE	FALSE	TRUE	1
P80297	MT1X Metallothionein-1X	MT1X	0	0	2.44	0	0	0.01	FALSE	FALSE	TRUE	1
P49005	POLD2 DNA polymerase delta subunit 2	POLD2	0	1.62	2.42	0	0.16	0	FALSE	FALSE	TRUE	1
P30408	TM4SF1 Transmembrane 4 L6 family member 1	TM4SF1	0	0	2.42	0	0	0.08	FALSE	FALSE	TRUE	1
P49914	MTHFS 5-formyltetrahydrofolate cyclo-ligase	MTHFS	0	0	2.42	0	0	0.19	FALSE	FALSE	TRUE	1
Q8WUF8	FAM172A Protein FAM172A	FAM172A	0	0	2.4	0	0	0	FALSE	FALSE	TRUE	1
Q9NX24	NHP2 H/ACA ribonucleoprotein complex subunit 2	NHP2	0	0	2.4	0	0	0	FALSE	FALSE	TRUE	1
P51151	RAB9A Ras-related protein Rab-9A	RAB9A	0	0	2.39	0	0	0	FALSE	FALSE	TRUE	1
Q15836	VAMP3 Vesicle-associated membrane protein 3	VAMP3	0	0	2.39	0	0	0	FALSE	FALSE	TRUE	1
Q9UI15	TAGLN3 Transgelin-3	TAGLN3	0	1.84	2.38	0	0.32	0.9	FALSE	FALSE	TRUE	1
Q9BRT9	GINS4 DNA replication complex GINS protein SLD5	GINS4	0	0	2.38	0	0	0.06	FALSE	FALSE	TRUE	1
Q5JS54	PSMG4 Proteasome assembly chaperone 4	PSMG4	0	0	2.37	0	0	0	FALSE	FALSE	TRUE	1
Q9Y4C8	RBM19 Probable RNA-binding protein 19	RBM19	1.41	0	2.36	0	0	0	FALSE	FALSE	TRUE	1
P06280	GLA Alpha-galactosidase A	GLA	0	0	2.36	0	0	0	FALSE	FALSE	TRUE	1
P43487	RANBP1 Ran-specific GTPase-activating protein	RANBP1	0	1.14	2.35	0	0	0	FALSE	FALSE	TRUE	1
O95865	DDAH2 N(G),N(G)-dimethylarginine dimethylaminohydrolase	DDAH2	0	0	2.35	0	0	0	FALSE	FALSE	TRUE	1
Q8IXB1	DNAJC10 DnaJ homolog subfamily C member 10	DNAJC10	0.69	1.89	2.34	0	0.21	0	FALSE	FALSE	TRUE	1
Q96AQ6	PBXIP1 Pre-B-cell leukemia transcription factor-interacti	PBXIP1	0	0	2.34	0	0	0.64	FALSE	FALSE	TRUE	1
H7C455	Uncharacterized protein	Uncharacterized	0	0	2.33	0	0	0.29	FALSE	FALSE	TRUE	1
P10586	PTPRF Receptor-type tyrosine-protein phosphatase F	PTPRF	1.83	1.35	2.32	0	0	1.73	FALSE	FALSE	TRUE	1
Q96CB9	NSUN4 Putative methyltransferase NSUN4	NSUN4	0	0	2.32	0	0	0	FALSE	FALSE	TRUE	1
P23468	PTPRD Receptor-type tyrosine-protein phosphatase delta	PTPRD	0	0	2.32	0	0	1.69	FALSE	FALSE	TRUE	1
O15066	KIF3B Kinesin-like protein KIF3B	KIF3B	0	0	2.31	0	0	0	FALSE	FALSE	TRUE	1
Q9Y496	KIF3A Kinesin-like protein KIF3A	KIF3A	0	0	2.31	0	0	0	FALSE	FALSE	TRUE	1
Q9NUL3	STAU2 Double-stranded RNA-binding protein Staufen homolo	STAU2	0	0	2.31	0	0	1.34	FALSE	FALSE	TRUE	1
Q9UMR2	DDX19B ATP-dependent RNA helicase DDX19B	DDX19B	0	0	2.3	0	0	0.26	FALSE	FALSE	TRUE	1
P32004	L1CAM Neural cell adhesion molecule L1	L1CAM	1.6	0	2.29	0	0	0.76	FALSE	FALSE	TRUE	1
Q9P2J3	KLHL9 Kelch-like protein 9	KLHL9	0	0	2.29	0	0	0	FALSE	FALSE	TRUE	1
Q6IAA8	LAMTOR1 Ragulator complex protein LAMTOR1	LAMTOR1	0	0	2.29	0	0	0.98	FALSE	FALSE	TRUE	1
Q9BR76	CORO1B Coronin-1B	CORO1B	1.9	1.9	2.28	0.44	0.11	0.32	FALSE	FALSE	TRUE	1
Q15392	DHCR24 Delta(24)-sterol reductase	DHCR24	1.76	1.58	2.27	0	0.28	0	FALSE	FALSE	TRUE	1
O95299	NDUFA10 NADH dehydrogenase	NDUFA10	0	0	2.27	0	0	0	FALSE	FALSE	TRUE	1
Q03468	ERCC6 DNA excision repair protein ERCC-6	ERCC6	0	0	2.27	0	0	0.4	FALSE	FALSE	TRUE	1
Q3YEC7	RABL6 Rab-like protein 6	RABL6	0	0	2.26	0	0	0	FALSE	FALSE	TRUE	1
Q676U5	ATG16L1 Autophagy-related protein 16-1	ATG16L1	0	0	2.25	0	0	0	FALSE	FALSE	TRUE	1
P51153	RAB13 Ras-related protein Rab-13	RAB13	0	0	2.25	0	0	0.27	FALSE	FALSE	TRUE	1
Q9NPA0	EMC7 ER membrane protein complex subunit 7	EMC7	0	0	2.25	0	0	0.97	FALSE	FALSE	TRUE	1
O95372	LYPLA2 Acyl-protein thioesterase 2	LYPLA2	0	0	2.24	0	0	0.45	FALSE	FALSE	TRUE	1
Q9Y4F1	FARP1 FERM, RhoGEF and pleckstrin domain-containing prot	FARP1	0.94	0	2.23	1.17	0	0	FALSE	FALSE	TRUE	1
Q9Y4P1	ATG4B Cysteine protease ATG4B	ATG4B	0	0	2.23	0	0	0	FALSE	FALSE	TRUE	1
Q9Y2P8	RCL1 RNA 3-terminal phosphate cyclase-like protein	RCL1	0	1.8	2.22	0	0.46	0	FALSE	FALSE	TRUE	1
P49366	DHPS Deoxyhypusine synthase	DHPS	1.51	1.77	2.21	0.57	0	0.59	FALSE	FALSE	TRUE	1
P84085	ARF5 ADP-ribosylation factor 5	ARF5	1.85	1.53	2.21	0.43	0.27	0.76	FALSE	FALSE	TRUE	1
Q70UQ0	IKBIP Inhibitor of nuclear factor kappa-B kinase-interac	IKBIP	0	1.27	2.21	0	0.79	1.51	FALSE	FALSE	TRUE	1
Q8N335	GPD1L Glycerol-3-phosphate dehydrogenase 1-like protein	GPD1L	1.48	0	2.21	0	0	0	FALSE	FALSE	TRUE	1
Q9NVM4	PRMT7 Protein arginine N-methyltransferase 7	PRMT7	0	1.98	2.19	0	0	0	FALSE	FALSE	TRUE	1
O95232	LUC7L3 Luc7-like protein 3	LUC7L3	1.87	1.85	2.19	0.92	0.06	0.87	FALSE	FALSE	TRUE	1
O94874	UFL1 E3 UFM1-protein ligase 1	UFL1	1.54	0.55	2.19	0	0	0	FALSE	FALSE	TRUE	1
Q9C0J8	WDR33 pre-mRNA 3 end processing protein WDR33	WDR33	0	0	2.19	0	0	0	FALSE	FALSE	TRUE	1
O00470	MEIS1 Homeobox protein Meis1	MEIS1	0	0	2.18	0	0	0	FALSE	FALSE	TRUE	1
P02765	AHSG Alpha-2-HS-glycoprotein	AHSG	0	0	2.18	0	0	0	FALSE	FALSE	TRUE	1
Q02543	RPL18A 60S ribosomal protein L18a	RPL18A	1.89	1.89	2.17	0.57	1.11	0.67	FALSE	FALSE	TRUE	1
Q96B01	RAD51AP1 RAD51-associated protein 1	RAD51AP1	0	0	2.17	0	0	0	FALSE	FALSE	TRUE	1
Q06787	FMR1 Fragile X mental retardation protein 1	FMR1	0	0.92	2.16	0	1.26	0.12	FALSE	FALSE	TRUE	1
P25490	YY1 Transcriptional repressor protein YY1	YY1	0	0	2.16	0	0	0	FALSE	FALSE	TRUE	1
Q309B1	TRIM16L Tripartite motif-containing protein 16-like protei	TRIM16L	0	0	2.16	0	0	0	FALSE	FALSE	TRUE	1
Q92783	STAM Signal transducing adapter molecule 1	STAM	0	0	2.16	0	0	0	FALSE	FALSE	TRUE	1
Q9GZR7	DDX24 ATP-dependent RNA helicase DDX24	DDX24	1.78	1.7	2.15	0.78	0	0.77	FALSE	FALSE	TRUE	1
Q9UNI6	DUSP12 Dual specificity protein phosphatase 12	DUSP12	0	0	2.15	0	0	0	FALSE	FALSE	TRUE	1
Q9Y2H1	STK38L Serine/threonine-protein kinase 38-like	STK38L	0	0	2.15	0	0	0	FALSE	FALSE	TRUE	1
Q8TB72	PUM2 Pumilio homolog 2	PUM2	0	0	2.15	0	0	0.38	FALSE	FALSE	TRUE	1
Q9NYL2	MLTK Mitogen-activated protein kinase kinase kinase MLT	MLTK	0	0	2.15	0	0	0.44	FALSE	FALSE	TRUE	1
Q08499	PDE4D cAMP-specific 3,5-cyclic phosphodiesterase 4D	PDE4D	1.92	1.86	2.14	1.57	0	0.24	FALSE	FALSE	TRUE	1
Q9Y697	NFS1 Cysteine desulfurase, mitochondrial	NFS1	1.65	0	2.14	1.49	0	0.39	FALSE	FALSE	TRUE	1
Q13643	FHL3 Four and a half LIM domains protein 3	FHL3	0	0	2.14	0	0	0	FALSE	FALSE	TRUE	1
Q92609	TBC1D5 TBC1 domain family member 5	TBC1D5	0	0	2.14	0	0	0	FALSE	FALSE	TRUE	1
Q9UBI6	GNG12 Guanine nucleotide-binding protein G(I)/G(S)/G(O)	GNG12	1.89	1.93	2.12	0	0	0.57	FALSE	FALSE	TRUE	1
P09913	IFIT2 Interferon-induced protein with tetratricopeptide	IFIT2	0	0	2.12	0	0	0	FALSE	FALSE	TRUE	1
P23142	FBLN1 Fibulin-1	FBLN1	0	0	2.12	0	0	0	FALSE	FALSE	TRUE	1
P57772	EEFSEC Selenocysteine-specific elongation factor	EEFSEC	0	0	2.12	0	0	0	FALSE	FALSE	TRUE	1
Q9BS40	LXN Latexin	LXN	0	0	2.12	0	0	0	FALSE	FALSE	TRUE	1
Q9UJV9	DDX41 Probable ATP-dependent RNA helicase DDX41	DDX41	0	0	2.12	0	0	0	FALSE	FALSE	TRUE	1
Q9P2Y5	UVRAG UV radiation resistance-associated gene protein	UVRAG	0	0	2.11	0	0	0	FALSE	FALSE	TRUE	1
Q9UBP6	METTL1 tRNA (guanine-N(7)-)-methyltransferase	METTL1	0	0	2.11	0	0	1.22	FALSE	FALSE	TRUE	1
Q96SB4	SRPK1 SRSF protein kinase 1	SRPK1	1.98	1.93	2.1	0.44	0	0	FALSE	FALSE	TRUE	1
Q7L5N1	COPS6 COP9 signalosome complex subunit 6	COPS6	1.94	1.96	2.09	1.04	0.52	3.42	FALSE	FALSE	TRUE	1
H3BMM5	Uncharacterized protein	Uncharacterized	0	0	2.09	0	0	0	FALSE	FALSE	TRUE	1
Q96AX1	VPS33A Vacuolar protein sorting-associated protein 33A	VPS33A	0	0	2.09	0	0	0	FALSE	FALSE	TRUE	1
Q13151	HNRNPA0 Heterogeneous nuclear ribonucleoprotein A0	HNRNPA0	1.91	1.84	2.07	1.09	0.45	0.21	FALSE	FALSE	TRUE	1
P20585	MSH3 DNA mismatch repair protein Msh3	MSH3	1.67	0	2.07	0.3	0	0.33	FALSE	FALSE	TRUE	1
P49841	GSK3B Glycogen synthase kinase-3 beta	GSK3B	1.99	1.09	2.06	0.37	1.44	1.02	FALSE	FALSE	TRUE	1
P26447	S100A4 Protein S100-A4	S100A4	0	0	2.06	0	0	0	FALSE	FALSE	TRUE	1
Q9NVX7	KBTBD4 Kelch repeat and BTB domain-containing protein 4	KBTBD4	0	0	2.06	0	0	0	FALSE	FALSE	TRUE	1
O60343	TBC1D4 TBC1 domain family member 4	TBC1D4	0	0	2.06	0	0	1.74	FALSE	FALSE	TRUE	1
Q9BZZ5	API5 Apoptosis inhibitor 5	API5	1.81	1.96	2.05	4.99	4.64	0.4	FALSE	FALSE	TRUE	1
P18077	RPL35A 60S ribosomal protein L35a	RPL35A	1.12	1.53	2.05	0	0.59	0.96	FALSE	FALSE	TRUE	1
Q8N806	UBR7 Putative E3 ubiquitin-protein ligase UBR7	UBR7	0	0	2.05	0	0	0	FALSE	FALSE	TRUE	1
Q86V21	AACS Acetoacetyl-CoA synthetase	AACS	1.93	1.76	2.04	1.54	0	0.56	FALSE	FALSE	TRUE	1
P05166	PCCB Propionyl-CoA carboxylase beta chain, mitochondria	PCCB	0	1.7	2.04	0	0	0	FALSE	FALSE	TRUE	1
Q6P3W7	SCYL2 SCY1-like protein 2	SCYL2	0.96	1.4	2.04	0	0	0.15	FALSE	FALSE	TRUE	1
Q6PCE3	PGM2L1 Glucose 1,6-bisphosphate synthase	PGM2L1	1.73	1.35	2.04	0.91	0.25	0.81	FALSE	FALSE	TRUE	1
P04114	APOB Apolipoprotein B-100	APOB	1.73	0	2.04	0	0	1.35	FALSE	FALSE	TRUE	1
Q96FN4	CPNE2 Copine-2	CPNE2	0	0	2.04	0	0	0	FALSE	FALSE	TRUE	1
Q9Y5Q9	GTF3C3 General transcription factor 3C polypeptide 3	GTF3C3	1.23	1.1	2.03	0	0	0	FALSE	FALSE	TRUE	1
Q8N726	CDKN2A Cyclin-dependent kinase inhibitor 2A, isoform 4	CDKN2A	0	1.76	2.02	0	0	0.27	FALSE	FALSE	TRUE	1
Q96GM8	TOE1 Target of EGR1 protein 1	TOE1	1.66	1.5	2.02	0.33	0	0.94	FALSE	FALSE	TRUE	1
Q96QD8	SLC38A2 Sodium-coupled neutral amino acid transporter 2	SLC38A2	0	1.5	2.02	0	0	0	FALSE	FALSE	TRUE	1
Q99590	SCAF11 Protein SCAF11	SCAF11	0	0	2.01	0	0	0	FALSE	FALSE	TRUE	1
Q9Y618	NCOR2 Nuclear receptor corepressor 2	NCOR2	0	0	2.01	0	0	0	FALSE	FALSE	TRUE	1
Q13045	FLII Protein flightless-1 homolog	FLII	1.88	1.46	2	0.5	0.39	5.92	FALSE	FALSE	TRUE	1
Q13425	SNTB2 Beta-2-syntrophin	SNTB2	1.92	2.13	1.99	0.15	0.01	0	FALSE	TRUE	FALSE	1
P06858	LPL Lipoprotein lipase	LPL	1.79	2.04	1.99	0	0	0.07	FALSE	TRUE	FALSE	1
Q96ST2	IWS1 Protein IWS1 homolog	IWS1	2.68	1.95	1.99	0.88	0.14	0.96	TRUE	FALSE	FALSE	1
P13164	IFITM1 Interferon-induced transmembrane protein 1	IFITM1	2.53	1.8	1.99	0.17	2.56	0.32	TRUE	FALSE	FALSE	1
Q01628	IFITM3 Interferon-induced transmembrane protein 3	IFITM3	2.53	1.8	1.99	0.17	2.56	0.32	TRUE	FALSE	FALSE	1
Q01629	IFITM2 Interferon-induced transmembrane protein 2	IFITM2	2.53	1.8	1.99	0.17	2.56	0.32	TRUE	FALSE	FALSE	1
Q12797	ASPH Aspartyl/asparaginyl beta-hydroxylase	ASPH	2.27	1.99	1.98	4.78	4.95	4.2	TRUE	FALSE	FALSE	1
P62314	SNRPD1 Small nuclear ribonucleoprotein Sm D1	SNRPD1	2.31	1.94	1.98	0.35	0.26	0.17	TRUE	FALSE	FALSE	1
P08195	SLC3A2 4F2 cell-surface antigen heavy chain	SLC3A2	2.15	1.86	1.98	0.48	0.21	0.43	TRUE	FALSE	FALSE	1
A6NDG6	PGP Phosphoglycolate phosphatase	PGP	2.32	1.82	1.98	0.17	0.34	0.94	TRUE	FALSE	FALSE	1
P46778	RPL21 60S ribosomal protein L21	RPL21	2.95	1.79	1.98	0	0	0.32	TRUE	FALSE	FALSE	1
O00571	DDX3X ATP-dependent RNA helicase DDX3X	DDX3X	2.6	1.79	1.98	1.52	0.44	0.67	TRUE	FALSE	FALSE	1
Q9H9J2	MRPL44 39S ribosomal protein L44, mitochondrial	MRPL44	3.05	1.64	1.98	1.37	0	0.44	TRUE	FALSE	FALSE	1
P49755	TMED10 Transmembrane emp24 domain-containing protein 10	TMED10	2.09	1.57	1.98	0.25	0.33	1.57	TRUE	FALSE	FALSE	1
P31939	ATIC Bifunctional purine biosynthesis protein PURH	ATIC	2.39	1.81	1.97	0.58	1.17	0.58	TRUE	FALSE	FALSE	1
P09001	MRPL3 39S ribosomal protein L3, mitochondrial	MRPL3	2.9	1.38	1.97	0.5	0	0.18	TRUE	FALSE	FALSE	1
Q8IV38	ANKMY2 Ankyrin repeat and MYND domain-containing protein	ANKMY2	3.3	0	1.97	0	0	0	TRUE	FALSE	FALSE	1
Q14232	EIF2B1 Translation initiation factor eIF-2B subunit alpha	EIF2B1	2.44	1.96	1.96	0.42	0.33	0.35	TRUE	FALSE	FALSE	1
P00367	GLUD1 Glutamate dehydrogenase 1, mitochondrial	GLUD1	2.42	1.94	1.96	0.37	0.36	0.39	TRUE	FALSE	FALSE	1
O95747	OXSR1 Serine/threonine-protein kinase OSR1	OXSR1	2.62	1.92	1.96	1.02	0.26	0.41	TRUE	FALSE	FALSE	1
Q9H0H5	RACGAP1 Rac GTPase-activating protein 1	RACGAP1	2.26	1.91	1.96	0.8	0	0.35	TRUE	FALSE	FALSE	1
Q9NVD7	PARVA Alpha-parvin	PARVA	2.6	1.89	1.96	0.74	0.46	0.2	TRUE	FALSE	FALSE	1
P36578	RPL4 60S ribosomal protein L4	RPL4	2.12	1.89	1.96	0.89	0.47	0.69	TRUE	FALSE	FALSE	1
P24941	CDK2 Cyclin-dependent kinase 2	CDK2	2.39	1.86	1.96	4.11	0.72	0.29	TRUE	FALSE	FALSE	1
P01023	A2M Alpha-2-macroglobulin	A2M	2.42	1.83	1.96	0.62	0.73	0.72	TRUE	FALSE	FALSE	1
P48200	IREB2 Iron-responsive element-binding protein 2	IREB2	2.59	1.67	1.96	0	0	0	TRUE	FALSE	FALSE	1
Q9H2P0	ADNP Activity-dependent neuroprotector homeobox protein	ADNP	3.34	1.11	1.96	1.18	0.76	0.99	TRUE	FALSE	FALSE	1
P25325	MPST 3-mercaptopyruvate sulfurtransferase	MPST	4.27	0	1.96	2.72	0	0	TRUE	FALSE	FALSE	1
P49736	MCM2 DNA replication licensing factor MCM2	MCM2	2.28	1.84	1.95	3.37	0.47	0.4	TRUE	FALSE	FALSE	1
O60547	GMDS GDP-mannose 4,6 dehydratase	GMDS	12.98	1.81	1.95	0	0	0	TRUE	FALSE	FALSE	1
Q9P2J5	LARS Leucine--tRNA ligase, cytoplasmic	LARS	2.3	1.81	1.95	0.74	0.45	0.57	TRUE	FALSE	FALSE	1
Q9UKG1	APPL1 DCC-interacting protein 13-alpha	APPL1	2.81	1.77	1.95	0.69	0	0.67	TRUE	FALSE	FALSE	1
P51812	RPS6KA3 Ribosomal protein S6 kinase alpha-3	RPS6KA3	2.67	0	1.95	1.39	0	0.78	TRUE	FALSE	FALSE	1
Q8N1G2	FTSJD2 Cap-specific mRNA (nucleoside-2-O-)-methyltransfe	FTSJD2	1.65	2.22	1.94	0.36	0.19	1.48	FALSE	TRUE	FALSE	1
P21283	ATP6V1C1 V-type proton ATPase subunit C 1	ATP6V1C1	3.02	1.95	1.94	2.9	0.29	0.26	TRUE	FALSE	FALSE	1
Q9H0U4	RAB1B Ras-related protein Rab-1B	RAB1B	2.55	1.91	1.94	0.84	0.05	0.51	TRUE	FALSE	FALSE	1
P07996	THBS1 Thrombospondin-1	THBS1	2.42	0	1.94	7.26	0	0.89	TRUE	FALSE	FALSE	1
Q9UBK8	MTRR Methionine synthase reductase	MTRR	2.39	0	1.94	0	0	0.44	TRUE	FALSE	FALSE	1
Q8NCN5	PDPR Pyruvate dehydrogenase phosphatase regulatory subu	PDPR	2.21	0	1.94	0	0	0.45	TRUE	FALSE	FALSE	1
P55735	SEC13 Protein SEC13 homolog	SEC13	2.28	1.96	1.93	0.19	0.29	1.02	TRUE	FALSE	FALSE	1
O60502	MGEA5 Bifunctional protein NCOAT	MGEA5	4.41	1.95	1.93	5.85	7.58	0.37	TRUE	FALSE	FALSE	1
P00338	LDHA L-lactate dehydrogenase A chain	LDHA	2.27	1.87	1.93	2.01	0.3	0.47	TRUE	FALSE	FALSE	1
Q8N163	KIAA1967 DBIRD complex subunit KIAA1967	KIAA1967	2.24	1.62	1.93	0.4	0.53	0.49	TRUE	FALSE	FALSE	1
O15511	ARPC5 Actin-related protein 2/3 complex subunit 5	ARPC5	2.02	1.5	1.93	0	0.4	0.35	TRUE	FALSE	FALSE	1
Q9BV20	MRI1 Methylthioribose-1-phosphate isomerase	MRI1	0.96	2.17	1.92	0	1.73	0.21	FALSE	TRUE	FALSE	1
Q9BSJ8	ESYT1 Extended synaptotagmin-1	ESYT1	2.1	1.89	1.92	5.82	0.3	2.03	TRUE	FALSE	FALSE	1
O95573	ACSL3 Long-chain-fatty-acid--CoA ligase 3	ACSL3	2.04	1.54	1.92	0.8	0.33	0.29	TRUE	FALSE	FALSE	1
Q5UIP0	RIF1 Telomere-associated protein RIF1	RIF1	3.5	0	1.92	1.63	0	0.44	TRUE	FALSE	FALSE	1
O95202	LETM1 LETM1 and EF-hand domain-containing protein 1, mit	LETM1	2.27	0	1.92	0	0	0.14	TRUE	FALSE	FALSE	1
P46776	RPL27A 60S ribosomal protein L27a	RPL27A	2.07	1.83	1.91	0.37	1.08	0.27	TRUE	FALSE	FALSE	1
Q9UPN3	MACF1 Microtubule-actin cross-linking factor 1, isoforms	MACF1	2.8	0.44	1.91	3.27	0	0.37	TRUE	FALSE	FALSE	1
Q9H7B2	RPF2 Ribosome production factor 2 homolog	RPF2	8.46	0	1.91	9.25	0	0.4	TRUE	FALSE	FALSE	1
Q96P11	NSUN5 Putative methyltransferase NSUN5	NSUN5	2.62	0	1.91	0.26	0	0	TRUE	FALSE	FALSE	1
P48730	CSNK1D Casein kinase I isoform delta	CSNK1D	2.23	0	1.91	0.27	0	0	TRUE	FALSE	FALSE	1
O60524	NEMF Nuclear export mediator factor NEMF	NEMF	2.44	1.9	1.9	0.32	1.16	0.6	TRUE	FALSE	FALSE	1
P27824	CANX Calnexin	CANX	2.31	1.8	1.9	3.09	0.35	0.39	TRUE	FALSE	FALSE	1
Q9Y3P9	RABGAP1 Rab GTPase-activating protein 1	RABGAP1	2.25	1.91	1.89	0.95	4.65	0.58	TRUE	FALSE	FALSE	1
P29401	TKT Transketolase	TKT	2.03	1.91	1.89	1.79	0.25	1.42	TRUE	FALSE	FALSE	1
Q00765	REEP5 Receptor expression-enhancing protein 5	REEP5	2.06	1.52	1.89	0.23	0.55	0.07	TRUE	FALSE	FALSE	1
Q14498	RBM39 RNA-binding protein 39	RBM39	2.27	1.46	1.89	0.42	0.16	0.19	TRUE	FALSE	FALSE	1
O95487	SEC24B Protein transport protein Sec24B	SEC24B	2.24	0	1.89	0	0	0	TRUE	FALSE	FALSE	1
O95376	ARIH2 E3 ubiquitin-protein ligase ARIH2	ARIH2	1.64	2.75	1.88	0.57	2.24	0.22	FALSE	TRUE	FALSE	1
Q9BQ52	ELAC2 Zinc phosphodiesterase ELAC protein 2	ELAC2	2.49	1.97	1.88	0.85	0.58	0.19	TRUE	FALSE	FALSE	1
P53396	ACLY ATP-citrate synthase	ACLY	2.24	1.92	1.88	2.14	2.07	2.15	TRUE	FALSE	FALSE	1
P02786	TFRC Transferrin receptor protein 1	TFRC	2	1.89	1.88	2.91	2.88	0.4	TRUE	FALSE	FALSE	1
P25205	MCM3 DNA replication licensing factor MCM3	MCM3	2.17	1.85	1.88	0.95	0.36	0.44	TRUE	FALSE	FALSE	1
Q9H3N1	TMX1 Thioredoxin-related transmembrane protein 1	TMX1	2.48	1.84	1.88	0	0	0.15	TRUE	FALSE	FALSE	1
P11177	PDHB Pyruvate dehydrogenase E1 component subunit beta,	PDHB	2.51	1.79	1.88	0.72	0.52	0.67	TRUE	FALSE	FALSE	1
Q8IWB7	WDFY1 WD repeat and FYVE domain-containing protein 1	WDFY1	2.19	1.62	1.88	0.58	0	0.36	TRUE	FALSE	FALSE	1
Q9NSV4	DIAPH3 Protein diaphanous homolog 3	DIAPH3	2.13	0.57	1.88	0.56	0	0.31	TRUE	FALSE	FALSE	1
O14976	GAK Cyclin-G-associated kinase	GAK	6.72	0	1.88	0	0	0.35	TRUE	FALSE	FALSE	1
Q8NHH9	ATL2 Atlastin-2	ATL2	2.1	0	1.88	0	0	0	TRUE	FALSE	FALSE	1
Q13363	CTBP1 C-terminal-binding protein 1	CTBP1	0	2.43	1.87	0	0.89	0.37	FALSE	TRUE	FALSE	1
Q96EE3	SEH1L Nucleoporin SEH1	SEH1L	2.1	1.88	1.87	1.35	0.25	0.4	TRUE	FALSE	FALSE	1
P55039	DRG2 Developmentally-regulated GTP-binding protein 2	DRG2	2.58	1.54	1.87	0.26	0	0.33	TRUE	FALSE	FALSE	1
Q06265	EXOSC9 Exosome complex component RRP45	EXOSC9	2.01	1.2	1.87	5.89	0.25	0.23	TRUE	FALSE	FALSE	1
Q9UMX0	UBQLN1 Ubiquilin-1	UBQLN1	4.06	0	1.87	7	0	0	TRUE	FALSE	FALSE	1
O15031	PLXNB2 Plexin-B2	PLXNB2	3.28	0	1.87	0	0	0.41	TRUE	FALSE	FALSE	1
P49770	EIF2B2 Translation initiation factor eIF-2B subunit beta	EIF2B2	2.62	0	1.87	1.25	0	0.61	TRUE	FALSE	FALSE	1
Q7Z2W4	ZC3HAV1 Zinc finger CCCH-type antiviral protein 1	ZC3HAV1	2.7	1.9	1.86	4.82	0.53	0.66	TRUE	FALSE	FALSE	1
O43172	PRPF4 U4/U6 small nuclear ribonucleoprotein Prp4	PRPF4	2.26	1.87	1.86	0.21	0.28	0.33	TRUE	FALSE	FALSE	1
P54709	ATP1B3 Sodium/potassium-transporting ATPase subunit beta-	ATP1B3	2.93	1.6	1.86	0	0.06	0.33	TRUE	FALSE	FALSE	1
Q6NYC1	JMJD6 Bifunctional arginine demethylase and lysyl-hydrox	JMJD6	2.03	1.6	1.86	0	0	0	TRUE	FALSE	FALSE	1
P46781	RPS9 40S ribosomal protein S9	RPS9	2.05	1.59	1.86	5.09	4.25	0.29	TRUE	FALSE	FALSE	1
P15374	UCHL3 Ubiquitin carboxyl-terminal hydrolase isozyme L3	UCHL3	2.7	0	1.86	0	0	0.35	TRUE	FALSE	FALSE	1
Q9NP72	RAB18 Ras-related protein Rab-18	RAB18	3.85	1.98	1.85	5.3	0.13	0.19	TRUE	FALSE	FALSE	1
Q4G0N4	NADKD1 NAD kinase domain-containing protein 1	NADKD1	2.5	1.94	1.85	0	0.46	0	TRUE	FALSE	FALSE	1
E9PPU0	EPPK1 Epiplakin	EPPK1	2.37	1.83	1.85	2.58	0.48	1.33	TRUE	FALSE	FALSE	1
P00390	GSR Glutathione reductase, mitochondrial	GSR	2.23	1.83	1.85	1.19	1.78	0.46	TRUE	FALSE	FALSE	1
P35658	NUP214 Nuclear pore complex protein Nup214	NUP214	2.04	1.74	1.85	0.57	0.38	0.72	TRUE	FALSE	FALSE	1
P49589	CARS Cysteine--tRNA ligase, cytoplasmic	CARS	2.46	1.67	1.85	1.05	0.55	3.98	TRUE	FALSE	FALSE	1
Q96CW5	TUBGCP3 Gamma-tubulin complex component 3	TUBGCP3	2	1.07	1.85	1	0	0	TRUE	FALSE	FALSE	1
J3KR12	Uncharacterized protein	Uncharacterized	0	2.52	1.84	0	0.88	0.81	FALSE	TRUE	FALSE	1
P22087	FBL rRNA 2-O-methyltransferase fibrillarin	FBL	1.71	2.06	1.84	0.5	0.16	0.31	FALSE	TRUE	FALSE	1
Q9Y277	VDAC3 Voltage-dependent anion-selective channel protein	VDAC3	2.01	1.98	1.84	0.93	0.68	0.28	TRUE	FALSE	FALSE	1
Q9BS26	ERP44 Endoplasmic reticulum resident protein 44	ERP44	2.62	1.92	1.84	0.48	1.16	0.11	TRUE	FALSE	FALSE	1
O00487	PSMD14 26S proteasome non-ATPase regulatory subunit 14	PSMD14	3.06	1.84	1.84	0.69	0.04	0.35	TRUE	FALSE	FALSE	1
P04843	RPN1 Dolichyl-diphosphooligosaccharide--protein glycosy	RPN1	2.21	1.84	1.84	0.79	0.28	0.38	TRUE	FALSE	FALSE	1
P42285	SKIV2L2 Superkiller viralicidic activity 2-like 2	SKIV2L2	2.23	1.83	1.84	0.79	0.39	0.4	TRUE	FALSE	FALSE	1
P18031	PTPN1 Tyrosine-protein phosphatase non-receptor type 1	PTPN1	2.56	1.8	1.84	0.46	0.25	0.45	TRUE	FALSE	FALSE	1
Q4J6C6	PREPL Prolyl endopeptidase-like	PREPL	2.13	1.78	1.84	0.46	0.39	0	TRUE	FALSE	FALSE	1
P11279	LAMP1 Lysosome-associated membrane glycoprotein 1	LAMP1	2.27	1.75	1.84	0.48	0.35	0.47	TRUE	FALSE	FALSE	1
Q8WVV9	HNRPLL Heterogeneous nuclear ribonucleoprotein L-like	HNRPLL	1.87	2.48	1.83	0.57	0.88	0.61	FALSE	TRUE	FALSE	1
Q9Y4X5	ARIH1 E3 ubiquitin-protein ligase ARIH1	ARIH1	1.89	2.21	1.83	0.26	0.85	0.26	FALSE	TRUE	FALSE	1
O00231	PSMD11 26S proteasome non-ATPase regulatory subunit 11	PSMD11	2.32	1.88	1.83	0.68	0.71	0.45	TRUE	FALSE	FALSE	1
Q03135	CAV1 Caveolin-1	CAV1	2.44	1.8	1.83	0	0.22	0	TRUE	FALSE	FALSE	1
Q15397	KIAA0020 Pumilio domain-containing protein KIAA0020	KIAA0020	2.08	1.79	1.83	4.1	0.26	0.57	TRUE	FALSE	FALSE	1
O75909	CCNK Cyclin-K	CCNK	2.2	1.75	1.83	0.02	0.57	0.58	TRUE	FALSE	FALSE	1
P12956	XRCC6 X-ray repair cross-complementing protein 6	XRCC6	2.14	1.72	1.83	1.78	1.78	1.89	TRUE	FALSE	FALSE	1
P47712	PLA2G4A Cytosolic phospholipase A2	PLA2G4A	2.21	1.7	1.83	0.3	0.29	0.38	TRUE	FALSE	FALSE	1
P98194	ATP2C1 Calcium-transporting ATPase type 2C member 1	ATP2C1	2.19	1.43	1.83	0	0.36	2.38	TRUE	FALSE	FALSE	1
O15091	KIAA0391 Mitochondrial ribonuclease P protein 3	KIAA0391	2.26	0	1.83	0	0	0.26	TRUE	FALSE	FALSE	1
P62701	RPS4X 40S ribosomal protein S4, X isoform	RPS4X	2.33	1.82	1.82	0.89	3.3	0.52	TRUE	FALSE	FALSE	1
Q13618	CUL3 Cullin-3	CUL3	2.24	1.56	1.82	0.35	0.2	0.53	TRUE	FALSE	FALSE	1
O96008	TOMM40 Mitochondrial import receptor subunit TOM40 homolo	TOMM40	3.46	1.54	1.82	7.07	0.21	0.24	TRUE	FALSE	FALSE	1
P11166	SLC2A1 Solute carrier family 2, facilitated glucose trans	SLC2A1	8.3	1.48	1.82	9.47	0.04	0.21	TRUE	FALSE	FALSE	1
P15586	GNS N-acetylglucosamine-6-sulfatase	GNS	2.37	0	1.82	0.87	0	0.12	TRUE	FALSE	FALSE	1
P42025	ACTR1B Beta-centractin	ACTR1B	0	2.77	1.81	0	1	0.4	FALSE	TRUE	FALSE	1
Q15061	WDR43 WD repeat-containing protein 43	WDR43	0	2.04	1.81	0	0.75	0.12	FALSE	TRUE	FALSE	1
P04818	TYMS Thymidylate synthase	TYMS	2.55	1.99	1.81	0.57	0.31	0.33	TRUE	FALSE	FALSE	1
Q13155	AIMP2 Aminoacyl tRNA synthase complex-interacting multif	AIMP2	3.22	1.94	1.81	0	0.19	0.19	TRUE	FALSE	FALSE	1
Q16401	PSMD5 26S proteasome non-ATPase regulatory subunit 5	PSMD5	2.53	1.84	1.81	0.61	0.28	0.41	TRUE	FALSE	FALSE	1
Q96D46	NMD3 60S ribosomal export protein NMD3	NMD3	2.34	1.84	1.81	2.1	0.3	0.4	TRUE	FALSE	FALSE	1
Q9Y262	EIF3L Eukaryotic translation initiation factor 3 subunit	EIF3L	2	1.79	1.81	0.44	0.24	0.68	TRUE	FALSE	FALSE	1
P05556	ITGB1 Integrin beta-1	ITGB1	2.16	1.68	1.81	1.07	0.29	0.29	TRUE	FALSE	FALSE	1
P45974	USP5 Ubiquitin carboxyl-terminal hydrolase 5	USP5	2.17	1.66	1.81	0.57	0.49	0.34	TRUE	FALSE	FALSE	1
Q9UBM7	DHCR7 7-dehydrocholesterol reductase	DHCR7	2.04	1.31	1.81	0.25	0.28	0.36	TRUE	FALSE	FALSE	1
O43913	ORC5 Origin recognition complex subunit 5	ORC5	0	2.34	1.8	0	0	0	FALSE	TRUE	FALSE	1
P27361	MAPK3 Mitogen-activated protein kinase 3	MAPK3	2.29	1.96	1.8	0.74	1.19	0.45	TRUE	FALSE	FALSE	1
Q13616	CUL1 Cullin-1	CUL1	2.48	1.9	1.8	1.11	0.35	0.39	TRUE	FALSE	FALSE	1
P12277	CKB Creatine kinase B-type	CKB	2.34	1.83	1.8	2.84	0.26	3.69	TRUE	FALSE	FALSE	1
Q8NBJ5	GLT25D1 Procollagen galactosyltransferase 1	GLT25D1	2.19	1.83	1.8	2.61	0.35	0.8	TRUE	FALSE	FALSE	1
P15328	FOLR1 Folate receptor alpha	FOLR1	2.19	1.8	1.8	0.73	0.34	5.44	TRUE	FALSE	FALSE	1
Q08J23	NSUN2 tRNA (cytosine(34)-C(5))-methyltransferase	NSUN2	2.21	1.75	1.8	0.95	0.61	0.54	TRUE	FALSE	FALSE	1
P46940	IQGAP1 Ras GTPase-activating-like protein IQGAP1	IQGAP1	2.09	1.72	1.8	3.09	1.71	0.5	TRUE	FALSE	FALSE	1
Q9Y3C6	PPIL1 Peptidyl-prolyl cis-trans isomerase-like 1	PPIL1	2.05	1.68	1.8	0	0	0.4	TRUE	FALSE	FALSE	1
Q12906	ILF3 Interleukin enhancer-binding factor 3	ILF3	2.16	1.67	1.8	2.32	2.07	2.83	TRUE	FALSE	FALSE	1
Q9BTV4	TMEM43 Transmembrane protein 43	TMEM43	2.06	1.43	1.8	0.33	0	1.86	TRUE	FALSE	FALSE	1
P18583	SON Protein SON	SON	4.2	0	1.8	3.2	0	0.3	TRUE	FALSE	FALSE	1
Q9BZG1	RAB34 Ras-related protein Rab-34	RAB34	2.21	0	1.8	0	0	0.25	TRUE	FALSE	FALSE	1
P28074	PSMB5 Proteasome subunit beta type-5	PSMB5	2.1	1.88	1.79	0.45	0.37	0.48	TRUE	FALSE	FALSE	1
O60678	PRMT3 Protein arginine N-methyltransferase 3	PRMT3	2.65	1.8	1.79	0.65	0.08	0.16	TRUE	FALSE	FALSE	1
P51965	UBE2E1 Ubiquitin-conjugating enzyme E2 E1	UBE2E1	6.05	0	1.79	0	0	0	TRUE	FALSE	FALSE	1
Q969T4	UBE2E3 Ubiquitin-conjugating enzyme E2 E3	UBE2E3	6.05	0	1.79	0	0	0	TRUE	FALSE	FALSE	1
Q96LR5	UBE2E2 Ubiquitin-conjugating enzyme E2 E2	UBE2E2	6.05	0	1.79	0	0	0	TRUE	FALSE	FALSE	1
Q8WXG6	MADD MAP kinase-activating death domain protein	MADD	4.03	0	1.79	0	0	0	TRUE	FALSE	FALSE	1
P42126	ECI1 Enoyl-CoA delta isomerase 1, mitochondrial	ECI1	1.89	2.29	1.78	1.32	0.93	0.53	FALSE	TRUE	FALSE	1
O43143	DHX15 Putative pre-mRNA-splicing factor ATP-dependent RN	DHX15	2.35	1.82	1.78	0.61	0.47	0.49	TRUE	FALSE	FALSE	1
Q9Y295	DRG1 Developmentally-regulated GTP-binding protein 1	DRG1	2.12	1.73	1.78	0.54	0.36	3.83	TRUE	FALSE	FALSE	1
P11802	CDK4 Cyclin-dependent kinase 4	CDK4	2.56	0	1.78	0.33	0	0	TRUE	FALSE	FALSE	1
Q96JC1	VPS39 Vam6/Vps39-like protein	VPS39	1.8	6.33	1.77	0	0	0.12	FALSE	TRUE	FALSE	1
O75718	CRTAP Cartilage-associated protein	CRTAP	1.88	2	1.77	0.38	0.4	0.27	FALSE	TRUE	FALSE	1
Q14152	EIF3A Eukaryotic translation initiation factor 3 subunit	EIF3A	2.21	1.92	1.77	2.33	2.94	3.16	TRUE	FALSE	FALSE	1
Q9BUQ8	DDX23 Probable ATP-dependent RNA helicase DDX23	DDX23	2.48	1.84	1.77	2.74	0.27	0.41	TRUE	FALSE	FALSE	1
F8VZW7	Uncharacterized protein	Uncharacterized	2.08	1.62	1.77	0.25	0	0.12	TRUE	FALSE	FALSE	1
Q9NYL9	TMOD3 Tropomodulin-3	TMOD3	3.05	0	1.77	3.1	0	0.52	TRUE	FALSE	FALSE	1
Q68CQ4	DIEXF Digestive organ expansion factor homolog	DIEXF	2.36	0	1.77	0.01	0	0.56	TRUE	FALSE	FALSE	1
P32320	CDA Cytidine deaminase	CDA	2.35	0	1.77	6.97	0	0	TRUE	FALSE	FALSE	1
Q9H267	VPS33B Vacuolar protein sorting-associated protein 33B	VPS33B	2.14	0	1.77	0	0	0.04	TRUE	FALSE	FALSE	1
Q9Y4X0	AMMECR1 AMME syndrome candidate gene 1 protein	AMMECR1	2.03	0	1.77	0	0	0	TRUE	FALSE	FALSE	1
Q9NVJ2	ARL8B ADP-ribosylation factor-like protein 8B	ARL8B	1.57	2.59	1.76	0.28	0	0.06	FALSE	TRUE	FALSE	1
O60762	DPM1 Dolichol-phosphate mannosyltransferase	DPM1	0	2.37	1.76	0	0.37	1.13	FALSE	TRUE	FALSE	1
Q16881	TXNRD1 Thioredoxin reductase 1, cytoplasmic	TXNRD1	2.28	1.97	1.76	1.41	0.51	0.56	TRUE	FALSE	FALSE	1
P67775	PPP2CA Serine/threonine-protein phosphatase 2A catalytic	PPP2CA	2.49	1.82	1.76	0.13	0.24	0.12	TRUE	FALSE	FALSE	1
O15294	OGT UDP-N-acetylglucosamine--peptide N-acetylglucosami	OGT	2.46	1.71	1.76	0.97	0.23	0.37	TRUE	FALSE	FALSE	1
P31040	SDHA Succinate dehydrogenase	SDHA	2.36	1.68	1.76	0.56	0.51	0.34	TRUE	FALSE	FALSE	1
Q8TDD1	DDX54 ATP-dependent RNA helicase DDX54	DDX54	3.08	1.6	1.76	1.36	0.25	0	TRUE	FALSE	FALSE	1
Q13636	RAB31 Ras-related protein Rab-31	RAB31	2.18	0.95	1.76	0.27	0.23	1.52	TRUE	FALSE	FALSE	1
F5H5P2	Uncharacterized protein	Uncharacterized	8.55	0	1.76	5.52	0	0	TRUE	FALSE	FALSE	1
P12694	BCKDHA 2-oxoisovalerate dehydrogenase subunit alpha, mito	BCKDHA	8.55	0	1.76	5.52	0	0	TRUE	FALSE	FALSE	1
Q9Y6Y8	SEC23IP SEC23-interacting protein	SEC23IP	2.69	1.98	1.75	3.59	0.19	0.39	TRUE	FALSE	FALSE	1
Q92466	DDB2 DNA damage-binding protein 2	DDB2	2.47	1.89	1.75	0.34	0.14	0.28	TRUE	FALSE	FALSE	1
Q9GZL7	WDR12 Ribosome biogenesis protein WDR12	WDR12	2.18	1.88	1.75	0.68	0.54	1.09	TRUE	FALSE	FALSE	1
Q16850	CYP51A1 Lanosterol 14-alpha demethylase	CYP51A1	8.36	1.81	1.75	9.4	0	0.49	TRUE	FALSE	FALSE	1
O00116	AGPS Alkyldihydroxyacetonephosphate synthase, peroxisom	AGPS	2.03	1.78	1.75	0.9	0.56	0.56	TRUE	FALSE	FALSE	1
P61204	ARF3 ADP-ribosylation factor 3	ARF3	2.04	1.72	1.75	0.41	0.5	0.37	TRUE	FALSE	FALSE	1
P84077	ARF1 ADP-ribosylation factor 1	ARF1	2.04	1.72	1.75	0.41	0.5	0.37	TRUE	FALSE	FALSE	1
Q14258	TRIM25 E3 ubiquitin/ISG15 ligase TRIM25	TRIM25	2.1	1.63	1.75	0.78	0.35	0.36	TRUE	FALSE	FALSE	1
O00178	GTPBP1 GTP-binding protein 1	GTPBP1	2.3	1.44	1.75	0.81	0.54	0.28	TRUE	FALSE	FALSE	1
P23786	CPT2 Carnitine O-palmitoyltransferase 2, mitochondrial	CPT2	2.66	0	1.75	4.81	0	0	TRUE	FALSE	FALSE	1
P27635	RPL10 60S ribosomal protein L10	RPL10	2	1.96	1.74	3.71	3.65	5.44	TRUE	FALSE	FALSE	1
Q9UNF1	MAGED2 Melanoma-associated antigen D2	MAGED2	2.17	1.78	1.74	0.86	0.31	0.27	TRUE	FALSE	FALSE	1
Q01082	SPTBN1 Spectrin beta chain, non-erythrocytic 1	SPTBN1	2.03	1.78	1.74	2.42	1.69	2.36	TRUE	FALSE	FALSE	1
Q96AC1	FERMT2 Fermitin family homolog 2	FERMT2	2.15	1.75	1.74	0.48	0.52	0.8	TRUE	FALSE	FALSE	1
P12955	PEPD Xaa-Pro dipeptidase	PEPD	3.17	1.68	1.74	0	0.11	0.43	TRUE	FALSE	FALSE	1
O15067	PFAS Phosphoribosylformylglycinamidine synthase	PFAS	2.32	1.67	1.74	0.66	0.48	0.68	TRUE	FALSE	FALSE	1
O43929	ORC4 Origin recognition complex subunit 4	ORC4	2.07	0	1.74	0	0	0.34	TRUE	FALSE	FALSE	1
Q9BQL6	FERMT1 Fermitin family homolog 1	FERMT1	2.05	0	1.74	0.19	0	0.18	TRUE	FALSE	FALSE	1
Q14126	DSG2 Desmoglein-2	DSG2	1.88	6.58	1.73	0	4.93	4.74	FALSE	TRUE	FALSE	1
P08134	RHOC Rho-related GTP-binding protein RhoC	RHOC	2.75	1.89	1.73	0.62	0.27	0.33	TRUE	FALSE	FALSE	1
Q96KR1	ZFR Zinc finger RNA-binding protein	ZFR	2.36	1.73	1.73	3.55	0.44	0.29	TRUE	FALSE	FALSE	1
[truncated: 1,979 more rows]
