# Supplementary material for: Chemical proteomic profiling of proteinN-homocysteinylation with a thioester probe
Source: Royal Society of Chemistry journal article supplement (doi:10.1039/c8sc00221e), 2018-01-01
Supplement: c8sc00221e3.xlsx [file c8sc00221e3.xlsx]

## Sheet: Sheet1
Quantified N-homocysteinylated proteins in HeLa cells treated with HTL in situ
ipi	description	symbol	Ratio of R1	Ratio of R2	Ratio of R3	sd of R1	sd of R2	sd of R3	Ratio of R1 >=2	Ratio of R2 >=2	Ratio of R3 >=2	times of quantification
P13716	ALAD Delta-aminolevulinic acid dehydratase	ALAD	15	15	15	0.02	4.9	3.44	TRUE	TRUE	TRUE	3
P61604	HSPE1 10 kDa heat shock protein, mitochondrial	HSPE1	15	15	9.71	3.83	2.78	4.85	TRUE	TRUE	TRUE	3
O76070	SNCG Gamma-synuclein	SNCG	8.84	15	8.11	8.72	0	9.75	TRUE	TRUE	TRUE	3
O43633	CHMP2A Charged multivesicular body protein 2a	CHMP2A	15	15	3.14	0	0	0.75	TRUE	TRUE	TRUE	3
Q9BY77	POLDIP3 Polymerase delta-interacting protein 3	POLDIP3	4.16	15	3.09	6.56	7.75	0.89	TRUE	TRUE	TRUE	3
Q96EK6	GNPNAT1 Glucosamine 6-phosphate N-acetyltransferase	GNPNAT1	3.73	15	2.95	0	0	0	TRUE	TRUE	TRUE	3
O00154	ACOT7 Cytosolic acyl coenzyme A thioester hydrolase	ACOT7	2.77	12.92	2.4	0.82	6.02	0.52	TRUE	TRUE	TRUE	3
P22307	SCP2 Non-specific lipid-transfer protein	SCP2	10.35	11.16	2.34	4.65	0	0	TRUE	TRUE	TRUE	3
P61088	UBE2N Ubiquitin-conjugating enzyme E2 N	UBE2N	4.1	9.75	3.23	0	7.43	7.15	TRUE	TRUE	TRUE	3
P46926	GNPDA1 Glucosamine-6-phosphate isomerase 1	GNPDA1	3.11	9.47	2.99	0.25	7.82	0.51	TRUE	TRUE	TRUE	3
P62318	SNRPD3 Small nuclear ribonucleoprotein Sm D3	SNRPD3	2.79	8.91	2.26	0	8.61	0	TRUE	TRUE	TRUE	3
O43815	STRN Striatin	STRN	4.55	8.88	3.72	4.67	8.66	2.46	TRUE	TRUE	TRUE	3
Q9H0B6	KLC2 Kinesin light chain 2	KLC2	5.25	8.72	2.8	0	8.88	1.46	TRUE	TRUE	TRUE	3
Q99623	PHB2 Prohibitin-2	PHB2	9.06	8.59	5.93	4.59	4.03	5.37	TRUE	TRUE	TRUE	3
Q14677	CLINT1 Clathrin interactor 1	CLINT1	15	8.48	8.29	0	9.21	9.49	TRUE	TRUE	TRUE	3
Q9GZZ1	NAA50 N-alpha-acetyltransferase 50	NAA50	2.55	8.23	2.18	0.76	9.57	0	TRUE	TRUE	TRUE	3
Q9UJZ1	STOML2 Stomatin-like protein 2	STOML2	7.43	7.78	12.73	5.3	1.03	5.01	TRUE	TRUE	TRUE	3
O15347	HMGB3 High mobility group protein B3	HMGB3	9.46	7.69	3.28	7.83	5.24	6.82	TRUE	TRUE	TRUE	3
P26885	FKBP2 Peptidyl-prolyl cis-trans isomerase FKBP2	FKBP2	3.21	7.53	2.79	0.59	0	0	TRUE	TRUE	TRUE	3
Q96BN8	FAM105B Protein FAM105B	FAM105B	13.95	6.9	3.57	0	0	1.79	TRUE	TRUE	TRUE	3
Q9Y281	CFL2 Cofilin-2	CFL2	6.47	6.42	4.61	3.49	0.47	3.23	TRUE	TRUE	TRUE	3
P09012	SNRPA U1 small nuclear ribonucleoprotein A	SNRPA	6.37	6.39	3.82	0.43	2.86	0	TRUE	TRUE	TRUE	3
P36542	ATP5C1 ATP synthase subunit gamma, mitochondrial	ATP5C1	5.73	6.34	2.96	2.28	3.99	0.77	TRUE	TRUE	TRUE	3
P23528	CFL1 Cofilin-1	CFL1	7	6.25	4.52	3.46	0.99	1.34	TRUE	TRUE	TRUE	3
Q13765	NACA Nascent polypeptide-associated complex subunit alp	NACA	6.15	6.25	3.21	5.14	4.42	0.54	TRUE	TRUE	TRUE	3
P48047	ATP5O ATP synthase subunit O, mitochondrial	ATP5O	4.87	6.24	4.11	0.47	4.01	1.39	TRUE	TRUE	TRUE	3
P30040	ERP29 Endoplasmic reticulum resident protein 29	ERP29	5.63	6.23	3.53	1.3	4.79	1.05	TRUE	TRUE	TRUE	3
Q00688	FKBP3 Peptidyl-prolyl cis-trans isomerase FKBP3	FKBP3	6.87	6.11	3.58	2.83	1.04	0.29	TRUE	TRUE	TRUE	3
P06576	ATP5B ATP synthase subunit beta, mitochondrial	ATP5B	5.18	6.05	3.41	3.6	3.58	1.25	TRUE	TRUE	TRUE	3
Q12904	AIMP1 Aminoacyl tRNA synthase complex-interacting multif	AIMP1	2.1	5.91	2.82	2.72	3.33	1.04	TRUE	TRUE	TRUE	3
P63151	PPP2R2A Serine/threonine-protein phosphatase 2A 55 kDa reg	PPP2R2A	2.16	5.85	2.15	0.83	4.41	0.34	TRUE	TRUE	TRUE	3
Q15637	SF1 Splicing factor 1	SF1	3.14	5.51	2	0.64	3.77	0.69	TRUE	TRUE	TRUE	3
P61758	VBP1 Prefoldin subunit 3	VBP1	5.58	5.47	4.53	2.09	5.54	1.19	TRUE	TRUE	TRUE	3
P50502	ST13 Hsc70-interacting protein	ST13	5.14	5.42	3.08	5.21	2.22	0.66	TRUE	TRUE	TRUE	3
Q9UKD2	MRTO4 mRNA turnover protein 4 homolog	MRTO4	7.47	5.41	2.08	0	3.61	0.96	TRUE	TRUE	TRUE	3
Q9UIJ7	AK3 GTP:AMP phosphotransferase, mitochondrial	AK3	4.51	5.36	3.75	4.87	5.86	5.61	TRUE	TRUE	TRUE	3
Q6YN16	HSDL2 Hydroxysteroid dehydrogenase-like protein 2	HSDL2	4.8	5.22	2.58	3.24	2.16	0.42	TRUE	TRUE	TRUE	3
Q08752	PPID Peptidyl-prolyl cis-trans isomerase D	PPID	3.02	5.13	3.08	1.08	6.53	2.11	TRUE	TRUE	TRUE	3
Q9BPW8	NIPSNAP1 Protein NipSnap homolog 1	NIPSNAP1	10.94	5.11	9.79	5.74	0	0	TRUE	TRUE	TRUE	3
Q96I99	SUCLG2 Succinyl-CoA ligase	SUCLG2	3.91	5.11	2.28	1.6	1.39	1.07	TRUE	TRUE	TRUE	3
P30041	PRDX6 Peroxiredoxin-6	PRDX6	3.62	4.94	2.75	0.94	2.72	0.78	TRUE	TRUE	TRUE	3
P08579	SNRPB2 U2 small nuclear ribonucleoprotein B	SNRPB2	5.9	4.89	5.73	4.29	2.36	2.52	TRUE	TRUE	TRUE	3
Q9HB71	CACYBP Calcyclin-binding protein	CACYBP	6.29	4.83	4.45	4.8	4.68	6.32	TRUE	TRUE	TRUE	3
Q16836	HADH Hydroxyacyl-coenzyme A dehydrogenase, mitochondria	HADH	4.47	4.83	3.77	3.97	1.1	0.75	TRUE	TRUE	TRUE	3
P10809	HSPD1 60 kDa heat shock protein, mitochondrial	HSPD1	3.88	4.81	2.95	2.79	1.89	3.09	TRUE	TRUE	TRUE	3
P38117	ETFB Electron transfer flavoprotein subunit beta	ETFB	4.84	4.78	4.93	1.01	6.13	1.87	TRUE	TRUE	TRUE	3
Q9UL46	PSME2 Proteasome activator complex subunit 2	PSME2	2.42	4.78	2.59	1	0	5.6	TRUE	TRUE	TRUE	3
P53999	SUB1 Activated RNA polymerase II transcriptional coacti	SUB1	7.04	4.72	2.86	4.01	5.47	0.56	TRUE	TRUE	TRUE	3
P00505	GOT2 Aspartate aminotransferase, mitochondrial	GOT2	4.36	4.53	3.31	0.57	0.98	1.33	TRUE	TRUE	TRUE	3
P43897	TSFM Elongation factor Ts, mitochondrial	TSFM	10.69	4.5	3.34	6.1	5.44	1.66	TRUE	TRUE	TRUE	3
P82650	MRPS22 28S ribosomal protein S22, mitochondrial	MRPS22	3.42	4.48	2.77	0	0.19	0	TRUE	TRUE	TRUE	3
P28070	PSMB4 Proteasome subunit beta type-4	PSMB4	8.89	4.39	3.24	6.97	0	0.18	TRUE	TRUE	TRUE	3
P13667	PDIA4 Protein disulfide-isomerase A4	PDIA4	4	4.37	3.09	4.03	3.86	0.72	TRUE	TRUE	TRUE	3
P35613	BSG Basigin	BSG	4.46	4.36	2.77	4.68	5.53	0.38	TRUE	TRUE	TRUE	3
P63104	YWHAZ 14-3-3 protein zeta/delta	YWHAZ	4.61	4.35	3.14	1.35	0.55	0.5	TRUE	TRUE	TRUE	3
O94905	ERLIN2 Erlin-2	ERLIN2	3.23	4.34	3.27	3.14	0.24	0.56	TRUE	TRUE	TRUE	3
Q9P2R7	SUCLA2 Succinyl-CoA ligase	SUCLA2	2.82	4.33	3.28	1.22	1.02	1.68	TRUE	TRUE	TRUE	3
P28838	LAP3 Cytosol aminopeptidase	LAP3	4.22	4.3	3.4	6.74	5.16	5.05	TRUE	TRUE	TRUE	3
Q16204	CCDC6 Coiled-coil domain-containing protein 6	CCDC6	2.66	4.3	2.41	5.16	3.83	0.62	TRUE	TRUE	TRUE	3
P16401	HIST1H1B Histone H1.5	HIST1H1B	5.98	4.27	2.7	4.22	1.05	0.79	TRUE	TRUE	TRUE	3
P05455	SSB Lupus La protein	SSB	3.88	4.23	3.09	0.56	3.33	1.68	TRUE	TRUE	TRUE	3
P31946	YWHAB 14-3-3 protein beta/alpha	YWHAB	4.61	4.22	3.06	2.66	0.59	0.44	TRUE	TRUE	TRUE	3
P23193	TCEA1 Transcription elongation factor A protein 1	TCEA1	3.45	4.19	2.73	2.7	1.19	0.49	TRUE	TRUE	TRUE	3
Q96AE4	FUBP1 Far upstream element-binding protein 1	FUBP1	3.57	4.19	2.25	4.05	1.31	0.55	TRUE	TRUE	TRUE	3
Q9P2E9	RRBP1 Ribosome-binding protein 1	RRBP1	3.54	4.18	2.9	5.13	1.44	3.96	TRUE	TRUE	TRUE	3
P07954	FH Fumarate hydratase, mitochondrial	FH	3.69	4.17	3.29	0.7	1.53	0.94	TRUE	TRUE	TRUE	3
P31947	SFN 14-3-3 protein sigma	SFN	2.96	4.17	2.83	0.05	0.62	0.29	TRUE	TRUE	TRUE	3
Q04917	YWHAH 14-3-3 protein eta	YWHAH	3.03	4.16	2.92	1	1.23	0.4	TRUE	TRUE	TRUE	3
P31948	STIP1 Stress-induced-phosphoprotein 1	STIP1	4.37	4.15	3.17	2.85	3.65	3.59	TRUE	TRUE	TRUE	3
P11021	HSPA5 78 kDa glucose-regulated protein	HSPA5	3.78	4.15	2.69	0.7	2.17	1	TRUE	TRUE	TRUE	3
Q13217	DNAJC3 DnaJ homolog subfamily C member 3	DNAJC3	4.03	4.14	3.22	0.43	0.9	1.27	TRUE	TRUE	TRUE	3
P47755	CAPZA2 F-actin-capping protein subunit alpha-2	CAPZA2	2.42	4.12	3.5	0	2.34	5.9	TRUE	TRUE	TRUE	3
Q9NX63	CHCHD3 Coiled-coil-helix-coiled-coil-helix domain-contain	CHCHD3	3.4	4.11	2.27	2.4	0	0	TRUE	TRUE	TRUE	3
P27348	YWHAQ 14-3-3 protein theta	YWHAQ	3.92	4.09	2.93	2.76	0.77	0.65	TRUE	TRUE	TRUE	3
P61201	COPS2 COP9 signalosome complex subunit 2	COPS2	2.78	4.09	2.26	7.13	1.1	0.29	TRUE	TRUE	TRUE	3
P09429	HMGB1 High mobility group protein B1	HMGB1	5.05	4.08	2.87	1.4	3.33	0.43	TRUE	TRUE	TRUE	3
P26583	HMGB2 High mobility group protein B2	HMGB2	6.73	4.07	3.08	2.37	4.28	3.28	TRUE	TRUE	TRUE	3
Q9H2U2	PPA2 Inorganic pyrophosphatase 2, mitochondrial	PPA2	3.68	4.06	3.21	3.92	1	0.84	TRUE	TRUE	TRUE	3
P23284	PPIB Peptidyl-prolyl cis-trans isomerase B	PPIB	3.9	4.03	2.64	0.66	1.19	0.8	TRUE	TRUE	TRUE	3
Q14847	LASP1 LIM and SH3 domain protein 1	LASP1	2.58	4.01	2.69	0.11	1.3	3.9	TRUE	TRUE	TRUE	3
P14625	HSP90B1 Endoplasmin	HSP90B1	3.19	4.01	2.51	2.1	1.15	2.6	TRUE	TRUE	TRUE	3
Q14232	EIF2B1 Translation initiation factor eIF-2B subunit alpha	EIF2B1	2.51	4.01	2.33	0	2.47	3.8	TRUE	TRUE	TRUE	3
P60981	DSTN Destrin	DSTN	3.75	4	3.08	1.15	1.39	0.08	TRUE	TRUE	TRUE	3
P38159	RBMX RNA-binding motif protein, X chromosome	RBMX	3.85	3.99	2.48	1.18	0.31	0.38	TRUE	TRUE	TRUE	3
P49721	PSMB2 Proteasome subunit beta type-2	PSMB2	2.34	3.98	3.05	0.97	1.78	6.21	TRUE	TRUE	TRUE	3
O14979	HNRPDL Heterogeneous nuclear ribonucleoprotein D-like	HNRPDL	2.86	3.98	2.11	0.4	0.01	0.3	TRUE	TRUE	TRUE	3
Q99497	PARK7 Protein DJ-1	PARK7	3.19	3.97	2.59	0.47	3.83	0.52	TRUE	TRUE	TRUE	3
P68104	EEF1A1 Elongation factor 1-alpha 1	EEF1A1	3.69	3.96	2.65	2.29	3.46	2.53	TRUE	TRUE	TRUE	3
P06132	UROD Uroporphyrinogen decarboxylase	UROD	3.72	3.95	2.22	0	0	0	TRUE	TRUE	TRUE	3
Q9Y3A5	SBDS Ribosome maturation protein SBDS	SBDS	4.23	3.92	3.16	4.92	1.09	0.72	TRUE	TRUE	TRUE	3
Q969G3	SMARCE1 SWI/SNF-related matrix-associated actin-dependent	SMARCE1	15	3.92	2.79	0	0	0	TRUE	TRUE	TRUE	3
Q99471	PFDN5 Prefoldin subunit 5	PFDN5	4.18	3.92	2.22	2.31	1.01	0.28	TRUE	TRUE	TRUE	3
Q8TCS8	PNPT1 Polyribonucleotide nucleotidyltransferase 1, mitoc	PNPT1	2.96	3.9	2.73	4.71	4.42	1.71	TRUE	TRUE	TRUE	3
Q969H8	C19orf10 UPF0556 protein C19orf10	C19orf10	3.49	3.89	2.7	0	0.56	0.49	TRUE	TRUE	TRUE	3
Q9Y266	NUDC Nuclear migration protein nudC	NUDC	3.01	3.89	2.5	1.35	2.34	0.85	TRUE	TRUE	TRUE	3
P06748	NPM1 Nucleophosmin	NPM1	3.33	3.89	2.15	3.21	0.95	0.33	TRUE	TRUE	TRUE	3
P21796	VDAC1 Voltage-dependent anion-selective channel protein	VDAC1	3.71	3.88	2.78	0.61	1.27	0.99	TRUE	TRUE	TRUE	3
P30101	PDIA3 Protein disulfide-isomerase A3	PDIA3	3.86	3.86	2.74	1.03	2.3	0.3	TRUE	TRUE	TRUE	3
P05026	ATP1B1 Sodium/potassium-transporting ATPase subunit beta-	ATP1B1	2.11	3.85	2.02	0.56	0	0	TRUE	TRUE	TRUE	3
P62191	PSMC1 26S protease regulatory subunit 4	PSMC1	3.37	3.82	2.46	0.59	0.59	0.92	TRUE	TRUE	TRUE	3
Q9UMS4	PRPF19 Pre-mRNA-processing factor 19	PRPF19	3.19	3.79	2.74	1.83	1.48	0.67	TRUE	TRUE	TRUE	3
P28066	PSMA5 Proteasome subunit alpha type-5	PSMA5	2.88	3.78	2.27	3.28	5.25	0.68	TRUE	TRUE	TRUE	3
Q8NBS9	TXNDC5 Thioredoxin domain-containing protein 5	TXNDC5	3.54	3.76	2.55	0.74	0.27	0.55	TRUE	TRUE	TRUE	3
P13804	ETFA Electron transfer flavoprotein subunit alpha, mito	ETFA	4.2	3.75	2.79	1.23	0.75	0.9	TRUE	TRUE	TRUE	3
Q8NBJ7	SUMF2 Sulfatase-modifying factor 2	SUMF2	3.73	3.75	2	0	0.3	0.54	TRUE	TRUE	TRUE	3
O76003	GLRX3 Glutaredoxin-3	GLRX3	3.96	3.74	2.33	0	0.43	0.52	TRUE	TRUE	TRUE	3
P62847	RPS24 40S ribosomal protein S24	RPS24	4.25	3.73	3.07	1.52	0.36	0.77	TRUE	TRUE	TRUE	3
P35637	FUS RNA-binding protein FUS	FUS	3.26	3.73	2.54	0.62	0	0.28	TRUE	TRUE	TRUE	3
P61981	YWHAG 14-3-3 protein gamma	YWHAG	3.27	3.72	2.96	0.59	0.71	0.71	TRUE	TRUE	TRUE	3
P36952	SERPINB5 Serpin B5	SERPINB5	2.97	3.72	2.54	1.41	2.02	0.4	TRUE	TRUE	TRUE	3
O95831	AIFM1 Apoptosis-inducing factor 1, mitochondrial	AIFM1	2.81	3.72	2.45	2.55	0.36	0.63	TRUE	TRUE	TRUE	3
P23919	DTYMK Thymidylate kinase	DTYMK	9.03	3.71	3.41	8.45	1.65	1.91	TRUE	TRUE	TRUE	3
Q9Y265	RUVBL1 RuvB-like 1	RUVBL1	3.07	3.71	2.58	3.49	3.09	0.58	TRUE	TRUE	TRUE	3
P55010	EIF5 Eukaryotic translation initiation factor 5	EIF5	3.16	3.68	2.68	1.34	4.75	0.97	TRUE	TRUE	TRUE	3
P12004	PCNA Proliferating cell nuclear antigen	PCNA	4.06	3.65	2.44	4.25	3.85	1.95	TRUE	TRUE	TRUE	3
P39748	FEN1 Flap endonuclease 1	FEN1	3.02	3.65	2.21	5.3	1.47	0.44	TRUE	TRUE	TRUE	3
P20700	LMNB1 Lamin-B1	LMNB1	4.26	3.64	2.65	1.43	3.25	1.14	TRUE	TRUE	TRUE	3
P09661	SNRPA1 U2 small nuclear ribonucleoprotein A	SNRPA1	3.57	3.63	2.27	0.68	1.63	0.83	TRUE	TRUE	TRUE	3
O60841	EIF5B Eukaryotic translation initiation factor 5B	EIF5B	2.19	3.63	2.48	0.54	5.96	0.34	TRUE	TRUE	TRUE	3
P19338	NCL Nucleolin	NCL	3.08	3.62	2.52	0.98	0.71	1.91	TRUE	TRUE	TRUE	3
P10599	TXN Thioredoxin	TXN	3.64	3.61	2.75	0.7	0.95	0.6	TRUE	TRUE	TRUE	3
Q01105	SET Protein SET	SET	3.95	3.6	2.98	0.35	1.18	0.38	TRUE	TRUE	TRUE	3
Q9NSD9	FARSB Phenylalanine--tRNA ligase beta subunit	FARSB	3.08	3.6	2.7	0.91	0.77	0.87	TRUE	TRUE	TRUE	3
E7EVH7	KLC1 Kinesin light chain 1	KLC1	2.84	3.6	2.26	1.42	0.76	1.08	TRUE	TRUE	TRUE	3
Q07866	KLC1 Kinesin light chain 1	KLC1	2.84	3.6	2.26	1.42	0.76	1.08	TRUE	TRUE	TRUE	3
O00469	PLOD2 Procollagen-lysine,2-oxoglutarate 5-dioxygenase 2	PLOD2	2.65	3.6	2.04	0.58	0.98	0.32	TRUE	TRUE	TRUE	3
Q9BYD6	MRPL1 39S ribosomal protein L1, mitochondrial	MRPL1	2.05	3.59	2.42	0.58	0	0	TRUE	TRUE	TRUE	3
P43034	PAFAH1B1 Platelet-activating factor acetylhydrolase IB subu	PAFAH1B1	3.24	3.57	2.71	0.98	0.53	4.37	TRUE	TRUE	TRUE	3
P61081	UBE2M NEDD8-conjugating enzyme Ubc12	UBE2M	5.12	3.57	2.64	0	0.22	0.47	TRUE	TRUE	TRUE	3
P62937	PPIA Peptidyl-prolyl cis-trans isomerase A	PPIA	3.55	3.54	2.48	1.3	1.14	0.3	TRUE	TRUE	TRUE	3
P20618	PSMB1 Proteasome subunit beta type-1	PSMB1	3.02	3.53	2.33	0.99	1.54	0.49	TRUE	TRUE	TRUE	3
Q01085	TIAL1 Nucleolysin TIAR	TIAL1	3.16	3.52	2.23	0.1	0.5	0.66	TRUE	TRUE	TRUE	3
Q16698	DECR1 2,4-dienoyl-CoA reductase, mitochondrial	DECR1	3.99	3.51	2.81	0	0.81	0.48	TRUE	TRUE	TRUE	3
O95232	LUC7L3 Luc7-like protein 3	LUC7L3	2.88	3.51	2.02	1.67	0.2	0.27	TRUE	TRUE	TRUE	3
Q32P28	LEPRE1 Prolyl 3-hydroxylase 1	LEPRE1	2.14	3.51	2.08	1.22	1.07	1.14	TRUE	TRUE	TRUE	3
Q9Y2B0	CNPY2 Protein canopy homolog 2	CNPY2	3.23	3.5	2.58	0	0.17	0.01	TRUE	TRUE	TRUE	3
P23381	WARS Tryptophan--tRNA ligase, cytoplasmic	WARS	3.62	3.5	2.28	0.97	0.86	0.5	TRUE	TRUE	TRUE	3
P78417	GSTO1 Glutathione S-transferase omega-1	GSTO1	3.39	3.48	3.13	2.03	0.21	2.57	TRUE	TRUE	TRUE	3
P22392	NME2 Nucleoside diphosphate kinase B	NME2	2.8	3.47	2.42	3.87	3.58	3.35	TRUE	TRUE	TRUE	3
P42765	ACAA2 3-ketoacyl-CoA thiolase, mitochondrial	ACAA2	3.22	3.47	2.37	3.44	4.37	0.21	TRUE	TRUE	TRUE	3
P15531	NME1 Nucleoside diphosphate kinase A	NME1	2.63	3.47	2.37	3.25	3.58	3.35	TRUE	TRUE	TRUE	3
Q07065	CKAP4 Cytoskeleton-associated protein 4	CKAP4	3.17	3.46	2.34	0.84	4.32	0.17	TRUE	TRUE	TRUE	3
Q92905	COPS5 COP9 signalosome complex subunit 5	COPS5	2.9	3.46	2.19	0.34	1.96	0.57	TRUE	TRUE	TRUE	3
P00558	PGK1 Phosphoglycerate kinase 1	PGK1	3.66	3.44	2.74	2.06	2.33	0.47	TRUE	TRUE	TRUE	3
P49189	ALDH9A1 4-trimethylaminobutyraldehyde dehydrogenase	ALDH9A1	8.36	3.44	2.63	6.77	4.7	1.31	TRUE	TRUE	TRUE	3
P07355	ANXA2 Annexin A2	ANXA2	3.29	3.44	2.63	0.64	0.68	0.56	TRUE	TRUE	TRUE	3
P07237	P4HB Protein disulfide-isomerase	P4HB	3.28	3.44	2.42	2.54	1	0.52	TRUE	TRUE	TRUE	3
O76031	CLPX ATP-dependent Clp protease ATP-binding subunit clp	CLPX	7.02	3.42	3.38	1.34	0.72	0.38	TRUE	TRUE	TRUE	3
P25705	ATP5A1 ATP synthase subunit alpha, mitochondrial	ATP5A1	4.36	3.42	2.8	2.92	0.92	0.51	TRUE	TRUE	TRUE	3
P38646	HSPA9 Stress-70 protein, mitochondrial	HSPA9	3.13	3.42	2.36	0.64	1.91	0.27	TRUE	TRUE	TRUE	3
P54577	YARS Tyrosine--tRNA ligase, cytoplasmic	YARS	2.85	3.42	2.3	0.76	3.06	0.51	TRUE	TRUE	TRUE	3
P09622	DLD Dihydrolipoyl dehydrogenase, mitochondrial	DLD	2.76	3.42	2.14	0.74	2.36	1.38	TRUE	TRUE	TRUE	3
P38606	ATP6V1A V-type proton ATPase catalytic subunit A	ATP6V1A	3.35	3.4	2.56	0.99	3.84	1.28	TRUE	TRUE	TRUE	3
P35241	RDX Radixin	RDX	3.12	3.4	2.38	2.39	0.64	0.4	TRUE	TRUE	TRUE	3
P47756	CAPZB F-actin-capping protein subunit beta	CAPZB	2.84	3.4	2.33	0.43	0.57	1.7	TRUE	TRUE	TRUE	3
Q06830	PRDX1 Peroxiredoxin-1	PRDX1	3.27	3.39	2.51	0.77	3.11	3.05	TRUE	TRUE	TRUE	3
Q99714	HSD17B10 3-hydroxyacyl-CoA dehydrogenase type-2	HSD17B10	3.42	3.38	2.78	0.75	0.41	2.24	TRUE	TRUE	TRUE	3
O60869	EDF1 Endothelial differentiation-related factor 1	EDF1	3.76	3.36	2.75	0.45	0	1.47	TRUE	TRUE	TRUE	3
Q13098	GPS1 COP9 signalosome complex subunit 1	GPS1	2.64	3.35	2.3	0.74	0.84	0.67	TRUE	TRUE	TRUE	3
Q9HC38	GLOD4 Glyoxalase domain-containing protein 4	GLOD4	2.59	3.34	2.53	1.16	4.16	0.49	TRUE	TRUE	TRUE	3
Q15691	MAPRE1 Microtubule-associated protein RP/EB family member	MAPRE1	2.89	3.33	2.19	1.1	1.47	0.3	TRUE	TRUE	TRUE	3
Q9NVX2	NLE1 Notchless protein homolog 1	NLE1	2.75	3.32	3.2	1.29	0	0	TRUE	TRUE	TRUE	3
Q6NZI2	PTRF Polymerase I and transcript release factor	PTRF	2.8	3.32	3	0.36	1.14	1.16	TRUE	TRUE	TRUE	3
P63173	RPL38 60S ribosomal protein L38	RPL38	3.59	3.32	2.76	0	0.3	0.69	TRUE	TRUE	TRUE	3
P41250	GARS Glycine--tRNA ligase	GARS	2.58	3.32	2.75	4.44	3.76	3.98	TRUE	TRUE	TRUE	3
Q02790	FKBP4 Peptidyl-prolyl cis-trans isomerase FKBP4	FKBP4	3.75	3.31	2.78	1.22	0.66	0.47	TRUE	TRUE	TRUE	3
P14314	PRKCSH Glucosidase 2 subunit beta	PRKCSH	3.4	3.31	2.47	0.58	0.52	0.73	TRUE	TRUE	TRUE	3
P24534	EEF1B2 Elongation factor 1-beta	EEF1B2	3.19	3.31	2.28	0.04	0.41	0.19	TRUE	TRUE	TRUE	3
P10644	PRKAR1A cAMP-dependent protein kinase type I-alpha regulat	PRKAR1A	2.2	3.3	2.05	0	0	0.06	TRUE	TRUE	TRUE	3
Q92945	KHSRP Far upstream element-binding protein 2	KHSRP	3.4	3.29	2.17	4.46	1.3	0.75	TRUE	TRUE	TRUE	3
P30520	ADSS Adenylosuccinate synthetase isozyme 2	ADSS	9.69	3.28	2.3	0	0.52	1.65	TRUE	TRUE	TRUE	3
Q13177	PAK2 Serine/threonine-protein kinase PAK 2	PAK2	9.2	3.28	2.23	8.21	0.41	0.39	TRUE	TRUE	TRUE	3
P02545	LMNA Prelamin-A/C	LMNA	3.83	3.27	2.7	0.94	0.77	1.61	TRUE	TRUE	TRUE	3
Q9UQE7	SMC3 Structural maintenance of chromosomes protein 3	SMC3	3.25	3.27	2.52	0.73	3.82	0.87	TRUE	TRUE	TRUE	3
P55809	OXCT1 Succinyl-CoA:3-ketoacid coenzyme A transferase 1,	OXCT1	2.92	3.27	2.24	0.81	1.09	0.45	TRUE	TRUE	TRUE	3
Q9UBW8	COPS7A COP9 signalosome complex subunit 7a	COPS7A	3.41	3.27	2.08	0	0.64	6.5	TRUE	TRUE	TRUE	3
P62888	RPL30 60S ribosomal protein L30	RPL30	3.17	3.26	2.89	1.27	0.22	3.65	TRUE	TRUE	TRUE	3
P62753	RPS6 40S ribosomal protein S6	RPS6	2.99	3.26	2.26	0.46	0.48	1.02	TRUE	TRUE	TRUE	3
P55209	NAP1L1 Nucleosome assembly protein 1-like 1	NAP1L1	3.47	3.25	2.89	0.2	2.55	0.26	TRUE	TRUE	TRUE	3
P08758	ANXA5 Annexin A5	ANXA5	2.92	3.25	2.29	0.48	1.05	0.97	TRUE	TRUE	TRUE	3
Q96DB5	FAM82B Regulator of microtubule dynamics protein 1	FAM82B	2.5	3.25	2.22	0	0	0	TRUE	TRUE	TRUE	3
P50454	SERPINH1 Serpin H1	SERPINH1	3.05	3.25	2.14	0.6	0.83	0.42	TRUE	TRUE	TRUE	3
Q9BYT8	NLN Neurolysin, mitochondrial	NLN	3.87	3.24	2.54	0.99	4.58	0.27	TRUE	TRUE	TRUE	3
P15311	EZR Ezrin	EZR	3.11	3.23	2.49	2.21	2.27	0.4	TRUE	TRUE	TRUE	3
Q96AY3	FKBP10 Peptidyl-prolyl cis-trans isomerase FKBP10	FKBP10	2.75	3.23	2.1	7.13	0.38	0.24	TRUE	TRUE	TRUE	3
Q15631	TSN Translin	TSN	2.2	3.23	2.09	0.83	0.51	0.43	TRUE	TRUE	TRUE	3
Q9BT78	COPS4 COP9 signalosome complex subunit 4	COPS4	3.16	3.22	2.42	1.78	4.43	0.92	TRUE	TRUE	TRUE	3
Q13451	FKBP5 Peptidyl-prolyl cis-trans isomerase FKBP5	FKBP5	2.75	3.21	2.89	0.07	1.41	0.4	TRUE	TRUE	TRUE	3
Q8IUD2	ERC1 ELKS/Rab6-interacting/CAST family member 1	ERC1	15	3.21	2.8	0	1.25	0.43	TRUE	TRUE	TRUE	3
Q9NXV6	CDKN2AIP CDKN2A-interacting protein	CDKN2AIP	3.31	3.21	2.41	3.95	0.19	4.88	TRUE	TRUE	TRUE	3
P05161	ISG15 Ubiquitin-like protein ISG15	ISG15	2.51	3.2	2.88	0	0.89	1.21	TRUE	TRUE	TRUE	3
P62258	YWHAE 14-3-3 protein epsilon	YWHAE	2.92	3.19	2.49	1.06	2.88	0.91	TRUE	TRUE	TRUE	3
O43390	HNRNPR Heterogeneous nuclear ribonucleoprotein R	HNRNPR	2.83	3.19	2.49	1.97	1.54	1.72	TRUE	TRUE	TRUE	3
Q99733	NAP1L4 Nucleosome assembly protein 1-like 4	NAP1L4	3.29	3.19	2.38	1.7	0.21	0.42	TRUE	TRUE	TRUE	3
P35237	SERPINB6 Serpin B6	SERPINB6	2.8	3.19	2.12	0.67	0.13	2.99	TRUE	TRUE	TRUE	3
Q96AG4	LRRC59 Leucine-rich repeat-containing protein 59	LRRC59	4.13	3.18	2.66	5.26	0.59	0.95	TRUE	TRUE	TRUE	3
O00303	EIF3F Eukaryotic translation initiation factor 3 subunit	EIF3F	2.9	3.18	2.02	0.38	2.01	0.28	TRUE	TRUE	TRUE	3
P43490	NAMPT Nicotinamide phosphoribosyltransferase	NAMPT	2.98	3.17	2.35	1.13	0.71	0.41	TRUE	TRUE	TRUE	3
Q15084	PDIA6 Protein disulfide-isomerase A6	PDIA6	3.33	3.16	2.66	1.12	0.61	0.52	TRUE	TRUE	TRUE	3
P31150	GDI1 Rab GDP dissociation inhibitor alpha	GDI1	3.84	3.16	2.58	0.99	0.55	0.45	TRUE	TRUE	TRUE	3
P35268	RPL22 60S ribosomal protein L22	RPL22	3.56	3.16	2.52	0.87	0.58	0.07	TRUE	TRUE	TRUE	3
P18206	VCL Vinculin	VCL	3.43	3.15	2.72	2.18	1.17	0.62	TRUE	TRUE	TRUE	3
P40227	CCT6A T-complex protein 1 subunit zeta	CCT6A	3.21	3.15	2.71	1.02	2.59	0.46	TRUE	TRUE	TRUE	3
Q8WUM4	PDCD6IP Programmed cell death 6-interacting protein	PDCD6IP	3.16	3.15	2.57	0.35	2.99	2.25	TRUE	TRUE	TRUE	3
P62913	RPL11 60S ribosomal protein L11	RPL11	3.26	3.15	2.4	0.36	0.35	0.33	TRUE	TRUE	TRUE	3
Q13162	PRDX4 Peroxiredoxin-4	PRDX4	3.05	3.14	2.88	2.96	0.82	0.55	TRUE	TRUE	TRUE	3
Q13561	DCTN2 Dynactin subunit 2	DCTN2	15	3.13	2.83	5.46	5.31	0.57	TRUE	TRUE	TRUE	3
Q99729	HNRNPAB Heterogeneous nuclear ribonucleoprotein A/B	HNRNPAB	3.11	3.13	2.02	1.07	1.28	0.19	TRUE	TRUE	TRUE	3
P61160	ACTR2 Actin-related protein 2	ACTR2	2.95	3.12	2.16	0.51	0.49	0.54	TRUE	TRUE	TRUE	3
O00429	DNM1L Dynamin-1-like protein	DNM1L	2.18	3.12	2.07	0.78	0.54	0.5	TRUE	TRUE	TRUE	3
P37837	TALDO1 Transaldolase	TALDO1	2.96	3.11	2.52	0.74	0.51	0.36	TRUE	TRUE	TRUE	3
Q14914	PTGR1 Prostaglandin reductase 1	PTGR1	2.8	3.11	2.36	1.07	0.7	0.25	TRUE	TRUE	TRUE	3
O95347	SMC2 Structural maintenance of chromosomes protein 2	SMC2	2.72	3.11	2.29	1.33	3.31	2.65	TRUE	TRUE	TRUE	3
Q9UNF0	PACSIN2 Protein kinase C and casein kinase substrate in ne	PACSIN2	3.64	3.1	3.37	0.87	0.62	5.97	TRUE	TRUE	TRUE	3
P62495	ETF1 Eukaryotic peptide chain release factor subunit 1	ETF1	2.79	3.1	2.24	0.8	0.91	2.19	TRUE	TRUE	TRUE	3
P62195	PSMC5 26S protease regulatory subunit 8	PSMC5	3.86	3.1	2.18	1.2	0.66	0.5	TRUE	TRUE	TRUE	3
P62333	PSMC6 26S protease regulatory subunit 10B	PSMC6	2.14	3.1	2.28	1.01	0.68	1.12	TRUE	TRUE	TRUE	3
P17980	PSMC3 26S protease regulatory subunit 6A	PSMC3	9.16	3.09	2.92	6.49	3.88	4.32	TRUE	TRUE	TRUE	3
P40261	NNMT Nicotinamide N-methyltransferase	NNMT	3.44	3.09	2.69	0	0.17	0.41	TRUE	TRUE	TRUE	3
Q9NVI7	ATAD3A ATPase family AAA domain-containing protein 3A	ATAD3A	2.8	3.09	2.68	1.89	0.77	0.17	TRUE	TRUE	TRUE	3
Q5T9A4	ATAD3B ATPase family AAA domain-containing protein 3B	ATAD3B	3.18	3.09	2.58	2.01	0.77	0.27	TRUE	TRUE	TRUE	3
Q86V81	ALYREF THO complex subunit 4	ALYREF	3.23	3.09	2.22	0	1.07	0.08	TRUE	TRUE	TRUE	3
P50395	GDI2 Rab GDP dissociation inhibitor beta	GDI2	2.96	3.08	2.5	2.96	1.41	0.44	TRUE	TRUE	TRUE	3
P29692	EEF1D Elongation factor 1-delta	EEF1D	2.9	3.08	2.19	1.07	0.38	0.26	TRUE	TRUE	TRUE	3
P40121	CAPG Macrophage-capping protein	CAPG	3.32	3.08	2.08	0.61	0.35	0.63	TRUE	TRUE	TRUE	3
P60866	RPS20 40S ribosomal protein S20	RPS20	2.28	3.08	2.17	0.82	0.83	0.13	TRUE	TRUE	TRUE	3
P82933	MRPS9 28S ribosomal protein S9, mitochondrial	MRPS9	2.54	3.07	3.04	0.45	0.8	0	TRUE	TRUE	TRUE	3
P08133	ANXA6 Annexin A6	ANXA6	2.92	3.07	2.36	4.26	2.78	0.82	TRUE	TRUE	TRUE	3
P06733	ENO1 Alpha-enolase	ENO1	3.16	3.06	2.52	2.04	0.54	0.72	TRUE	TRUE	TRUE	3
P49368	CCT3 T-complex protein 1 subunit gamma	CCT3	2.92	3.06	2.33	2.88	2.41	2.25	TRUE	TRUE	TRUE	3
P40925	MDH1 Malate dehydrogenase, cytoplasmic	MDH1	3.09	3.06	2.18	0.94	0.94	0.27	TRUE	TRUE	TRUE	3
P13929	ENO3 Beta-enolase	ENO3	3.06	3.05	2.55	0.85	0.48	0.21	TRUE	TRUE	TRUE	3
P34932	HSPA4 Heat shock 70 kDa protein 4	HSPA4	2.73	3.05	2.51	0.59	2.66	1.91	TRUE	TRUE	TRUE	3
P30084	ECHS1 Enoyl-CoA hydratase, mitochondrial	ECHS1	3.34	3.05	2.02	0.78	0.38	0.19	TRUE	TRUE	TRUE	3
Q92598	HSPH1 Heat shock protein 105 kDa	HSPH1	2.57	3.04	2.23	1.84	0.53	0.66	TRUE	TRUE	TRUE	3
Q9BY44	EIF2A Eukaryotic translation initiation factor 2A	EIF2A	2.28	3.03	3.38	0.97	0.98	0.68	TRUE	TRUE	TRUE	3
P04406	GAPDH Glyceraldehyde-3-phosphate dehydrogenase	GAPDH	2.59	3.03	2.39	1.88	1.49	1.92	TRUE	TRUE	TRUE	3
P40939	HADHA Trifunctional enzyme subunit alpha, mitochondrial	HADHA	2.81	3.03	2.37	0.77	0.83	0.54	TRUE	TRUE	TRUE	3
O60506	SYNCRIP Heterogeneous nuclear ribonucleoprotein Q	SYNCRIP	2.75	3.03	2.29	0.75	2.92	0.5	TRUE	TRUE	TRUE	3
P38919	EIF4A3 Eukaryotic initiation factor 4A-III	EIF4A3	2.99	3.03	2.23	0.69	0.53	0.44	TRUE	TRUE	TRUE	3
P48507	GCLM Glutamate--cysteine ligase regulatory subunit	GCLM	4.65	3.02	3.04	1.04	0.27	0.78	TRUE	TRUE	TRUE	3
P08238	HSP90AB1 Heat shock protein HSP 90-beta	HSP90AB1	2.96	3.02	2.34	0.84	1.04	1.77	TRUE	TRUE	TRUE	3
P51991	HNRNPA3 Heterogeneous nuclear ribonucleoprotein A3	HNRNPA3	2.54	3.02	2.07	5.04	4.99	4.34	TRUE	TRUE	TRUE	3
P20042	EIF2S2 Eukaryotic translation initiation factor 2 subunit	EIF2S2	3.21	3.01	2.53	0.92	0.52	0.48	TRUE	TRUE	TRUE	3
P50991	CCT4 T-complex protein 1 subunit delta	CCT4	2.8	3.01	2.31	2.47	0.95	0.75	TRUE	TRUE	TRUE	3
P23396	RPS3 40S ribosomal protein S3	RPS3	2.81	3.01	2.17	0.88	0.7	0.29	TRUE	TRUE	TRUE	3
Q16851	UGP2 UTP--glucose-1-phosphate uridylyltransferase	UGP2	2.07	3.01	2.04	1.76	0.38	0.44	TRUE	TRUE	TRUE	3
Q9Y3Z3	SAMHD1 SAM domain and HD domain-containing protein 1	SAMHD1	2.36	3	2.83	0	0.57	0.69	TRUE	TRUE	TRUE	3
P30086	PEBP1 Phosphatidylethanolamine-binding protein 1	PEBP1	2.76	3	2.44	0.59	0.44	0.17	TRUE	TRUE	TRUE	3
Q16401	PSMD5 26S proteasome non-ATPase regulatory subunit 5	PSMD5	2.72	3	2.41	1.67	3.01	0.59	TRUE	TRUE	TRUE	3
P30837	ALDH1B1 Aldehyde dehydrogenase X, mitochondrial	ALDH1B1	2.64	2.99	2.66	0.72	4.95	0.84	TRUE	TRUE	TRUE	3
P11940	PABPC1 Polyadenylate-binding protein 1	PABPC1	3.25	2.99	2.53	3.23	3.22	0.74	TRUE	TRUE	TRUE	3
Q15459	SF3A1 Splicing factor 3A subunit 1	SF3A1	3.13	2.99	2.51	5.12	0.97	0.77	TRUE	TRUE	TRUE	3
A0MZ66	KIAA1598 Shootin-1	KIAA1598	2.03	2.99	2.77	0	2.42	0.49	TRUE	TRUE	TRUE	3
P31153	MAT2A S-adenosylmethionine synthase isoform type-2	MAT2A	2.62	2.99	2.15	0.55	0.43	0.36	TRUE	TRUE	TRUE	3
Q9UBQ7	GRHPR Glyoxylate reductase/hydroxypyruvate reductase	GRHPR	3.17	2.98	2.44	0.46	0.54	0.65	TRUE	TRUE	TRUE	3
P09382	LGALS1 Galectin-1	LGALS1	2.58	2.98	2.36	1.34	5.48	0.98	TRUE	TRUE	TRUE	3
Q12874	SF3A3 Splicing factor 3A subunit 3	SF3A3	3.36	2.96	2.84	0.47	0.56	0.48	TRUE	TRUE	TRUE	3
O60749	SNX2 Sorting nexin-2	SNX2	3.21	2.96	2.68	0.73	1.62	0	TRUE	TRUE	TRUE	3
P14868	DARS Aspartate--tRNA ligase, cytoplasmic	DARS	2.48	2.96	2.07	0.39	0.8	0.44	TRUE	TRUE	TRUE	3
Q9NSE4	IARS2 Isoleucine--tRNA ligase, mitochondrial	IARS2	2.58	2.95	2.72	0.44	3.15	4.24	TRUE	TRUE	TRUE	3
O76094	SRP72 Signal recognition particle 72 kDa protein	SRP72	3.74	2.94	2.97	1.22	0.54	1.11	TRUE	TRUE	TRUE	3
P22695	UQCRC2 Cytochrome b-c1 complex subunit 2, mitochondrial	UQCRC2	3.16	2.94	2.34	0.56	0.66	0.3	TRUE	TRUE	TRUE	3
P18669	PGAM1 Phosphoglycerate mutase 1	PGAM1	3.06	2.94	2.26	0.63	2.36	0.43	TRUE	TRUE	TRUE	3
P49411	TUFM Elongation factor Tu, mitochondrial	TUFM	2.53	2.94	2.13	0.9	0.46	0.5	TRUE	TRUE	TRUE	3
P48444	ARCN1 Coatomer subunit delta	ARCN1	2.32	2.93	2.2	1.11	0.75	0.69	TRUE	TRUE	TRUE	3
Q9UDY4	DNAJB4 DnaJ homolog subfamily B member 4	DNAJB4	3.7	2.92	2.05	1.53	4.96	0.4	TRUE	TRUE	TRUE	3
Q01813	PFKP 6-phosphofructokinase type C	PFKP	2.42	2.92	2.21	3.17	1.96	0.18	TRUE	TRUE	TRUE	3
Q15785	TOMM34 Mitochondrial import receptor subunit TOM34	TOMM34	3.12	2.91	2.7	4.09	0.86	0.38	TRUE	TRUE	TRUE	3
P60842	EIF4A1 Eukaryotic initiation factor 4A-I	EIF4A1	2.94	2.91	2.23	0.48	0.77	0.44	TRUE	TRUE	TRUE	3
P25398	RPS12 40S ribosomal protein S12	RPS12	3.69	2.91	2.21	1.11	0.36	0.31	TRUE	TRUE	TRUE	3
P52272	HNRNPM Heterogeneous nuclear ribonucleoprotein M	HNRNPM	2.98	2.9	2.26	2.3	2.26	2.29	TRUE	TRUE	TRUE	3
P06730	EIF4E Eukaryotic translation initiation factor 4E	EIF4E	2.41	2.9	2.25	0	0.11	0.09	TRUE	TRUE	TRUE	3
O94925	GLS Glutaminase kidney isoform, mitochondrial	GLS	2.67	2.89	2.47	1.75	0.95	0.45	TRUE	TRUE	TRUE	3
P62826	RAN GTP-binding nuclear protein Ran	RAN	2.91	2.88	2.49	1.39	1	0.79	TRUE	TRUE	TRUE	3
P26038	MSN Moesin	MSN	3.02	2.88	2.46	2.35	0.65	1.69	TRUE	TRUE	TRUE	3
Q8WU90	ZC3H15 Zinc finger CCCH domain-containing protein 15	ZC3H15	2.77	2.88	2.03	0.25	0.57	5.41	TRUE	TRUE	TRUE	3
P36871	PGM1 Phosphoglucomutase-1	PGM1	2.46	2.88	2.05	0.55	0.72	0.45	TRUE	TRUE	TRUE	3
P48643	CCT5 T-complex protein 1 subunit epsilon	CCT5	2.7	2.87	2.24	2.87	2.02	0.71	TRUE	TRUE	TRUE	3
Q14683	SMC1A Structural maintenance of chromosomes protein 1A	SMC1A	2.45	2.87	2.05	3.72	2.85	2.37	TRUE	TRUE	TRUE	3
Q13310	PABPC4 Polyadenylate-binding protein 4	PABPC4	3.15	2.84	2.52	4.68	0.32	0.78	TRUE	TRUE	TRUE	3
Q9Y305	ACOT9 Acyl-coenzyme A thioesterase 9, mitochondrial	ACOT9	3.03	2.84	2.36	0.33	3.91	0.53	TRUE	TRUE	TRUE	3
Q86YP4	GATAD2A Transcriptional repressor p66-alpha	GATAD2A	2.18	2.84	2.24	0	0	0	TRUE	TRUE	TRUE	3
Q16891	IMMT Mitochondrial inner membrane protein	IMMT	2.4	2.84	2.13	1.09	1.37	0.79	TRUE	TRUE	TRUE	3
P48735	IDH2 Isocitrate dehydrogenase	IDH2	6.04	2.83	3.93	5.64	3.26	5.29	TRUE	TRUE	TRUE	3
P24666	ACP1 Low molecular weight phosphotyrosine protein phosp	ACP1	3.45	2.83	2.24	0	0	0.38	TRUE	TRUE	TRUE	3
P62316	SNRPD2 Small nuclear ribonucleoprotein Sm D2	SNRPD2	2.69	2.82	2.71	0.32	0.55	0.21	TRUE	TRUE	TRUE	3
P00491	PNP Purine nucleoside phosphorylase	PNP	3.6	2.82	2.6	0	4.33	0.66	TRUE	TRUE	TRUE	3
O75874	IDH1 Isocitrate dehydrogenase	IDH1	2.71	2.82	2.29	0.99	3.76	0.29	TRUE	TRUE	TRUE	3
Q8NE71	ABCF1 ATP-binding cassette sub-family F member 1	ABCF1	2.58	2.82	2.04	4.59	0.25	0.43	TRUE	TRUE	TRUE	3
P17987	TCP1 T-complex protein 1 subunit alpha	TCP1	2.88	2.82	2	0.8	2.02	0.66	TRUE	TRUE	TRUE	3
P25789	PSMA4 Proteasome subunit alpha type-4	PSMA4	2.4	2.82	2.04	4.73	0.5	4.89	TRUE	TRUE	TRUE	3
P30044	PRDX5 Peroxiredoxin-5, mitochondrial	PRDX5	2.43	2.82	2	0.48	0.35	0.68	TRUE	TRUE	TRUE	3
Q16658	FSCN1 Fascin	FSCN1	2.85	2.81	2.43	0.77	1.36	0.65	TRUE	TRUE	TRUE	3
Q9Y285	FARSA Phenylalanine--tRNA ligase alpha subunit	FARSA	2.08	2.81	2.24	0.7	0.5	0.43	TRUE	TRUE	TRUE	3
P35659	DEK Protein DEK	DEK	3.11	2.8	2.49	0.36	0.79	0.5	TRUE	TRUE	TRUE	3
P05198	EIF2S1 Eukaryotic translation initiation factor 2 subunit	EIF2S1	2.84	2.8	2.31	0.63	0.62	0.61	TRUE	TRUE	TRUE	3
Q99439	CNN2 Calponin-2	CNN2	2.88	2.8	2.09	1.07	3.1	0.22	TRUE	TRUE	TRUE	3
P42126	ECI1 Enoyl-CoA delta isomerase 1, mitochondrial	ECI1	2.31	2.8	2.17	0.66	0.74	0.49	TRUE	TRUE	TRUE	3
Q00796	SORD Sorbitol dehydrogenase	SORD	2.52	2.78	2.42	0	0.8	0.55	TRUE	TRUE	TRUE	3
Q04828	AKR1C1 Aldo-keto reductase family 1 member C1	AKR1C1	2.65	2.78	2.3	0.32	0.66	0.37	TRUE	TRUE	TRUE	3
Q9UKK9	NUDT5 ADP-sugar pyrophosphatase	NUDT5	5.73	2.78	2.16	0	0.8	0.31	TRUE	TRUE	TRUE	3
P14618	PKM Pyruvate kinase isozymes M1/M2	PKM	2.7	2.77	2.26	0.57	0.86	1.35	TRUE	TRUE	TRUE	3
O00231	PSMD11 26S proteasome non-ATPase regulatory subunit 11	PSMD11	2.81	2.77	2.2	1.14	2.85	1.63	TRUE	TRUE	TRUE	3
P07900	HSP90AA1 Heat shock protein HSP 90-alpha	HSP90AA1	2.84	2.77	2.17	1.82	1.26	0.39	TRUE	TRUE	TRUE	3
Q99832	CCT7 T-complex protein 1 subunit eta	CCT7	2.64	2.77	2.17	2.6	3.18	0.41	TRUE	TRUE	TRUE	3
Q96HE7	ERO1L ERO1-like protein alpha	ERO1L	2.17	2.77	2.22	0.48	0.71	0.42	TRUE	TRUE	TRUE	3
Q9Y608	LRRFIP2 Leucine-rich repeat flightless-interacting protein	LRRFIP2	12.36	2.76	3.4	0	0	1.34	TRUE	TRUE	TRUE	3
A6NE09	RPSAP58 Protein RPSAP58	RPSAP58	2.53	2.76	2.28	1.25	0.28	1.22	TRUE	TRUE	TRUE	3
O14818	PSMA7 Proteasome subunit alpha type-7	PSMA7	3.27	2.76	2.1	0.44	0.47	0.3	TRUE	TRUE	TRUE	3
P06396	GSN Gelsolin	GSN	2.31	2.76	2.28	1.08	0.29	0.34	TRUE	TRUE	TRUE	3
P55786	NPEPPS Puromycin-sensitive aminopeptidase	NPEPPS	2.43	2.76	2.02	0.5	3.52	0.59	TRUE	TRUE	TRUE	3
P11310	ACADM Medium-chain specific acyl-CoA dehydrogenase, mito	ACADM	2.92	2.75	11.94	0.8	1.61	0	TRUE	TRUE	TRUE	3
P09525	ANXA4 Annexin A4	ANXA4	3.09	2.75	2.29	0	0.55	0.67	TRUE	TRUE	TRUE	3
Q96DG6	CMBL Carboxymethylenebutenolidase homolog	CMBL	8.47	2.75	2.23	9.23	3.95	6.54	TRUE	TRUE	TRUE	3
O00232	PSMD12 26S proteasome non-ATPase regulatory subunit 12	PSMD12	2.87	2.75	2.21	0.79	1.27	1.28	TRUE	TRUE	TRUE	3
P16930	FAH Fumarylacetoacetase	FAH	3.09	2.75	2	0	0	0.01	TRUE	TRUE	TRUE	3
Q9UQ80	PA2G4 Proliferation-associated protein 2G4	PA2G4	2.41	2.75	2.36	0.43	0.6	0.4	TRUE	TRUE	TRUE	3
Q99798	ACO2 Aconitate hydratase, mitochondrial	ACO2	3.08	2.74	2.42	1.93	3.21	0.22	TRUE	TRUE	TRUE	3
Q96CW1	AP2M1 AP-2 complex subunit mu	AP2M1	2.05	2.74	2.08	0	1.08	0	TRUE	TRUE	TRUE	3
P22102	GART Trifunctional purine biosynthetic protein adenosin	GART	2.34	2.74	2.04	0.65	1.32	0.38	TRUE	TRUE	TRUE	3
Q9UKM9	RALY RNA-binding protein Raly	RALY	3.34	2.73	2.11	5.89	0.68	0.42	TRUE	TRUE	TRUE	3
P10515	DLAT Dihydrolipoyllysine-residue acetyltransferase comp	DLAT	4.85	2.72	2.09	2.63	0.52	1.33	TRUE	TRUE	TRUE	3
O75436	VPS26A Vacuolar protein sorting-associated protein 26A	VPS26A	2.87	2.72	2.04	0	0.78	0.02	TRUE	TRUE	TRUE	3
P12429	ANXA3 Annexin A3	ANXA3	2.92	2.71	2.26	0.45	0.84	0.7	TRUE	TRUE	TRUE	3
Q15181	PPA1 Inorganic pyrophosphatase	PPA1	3.74	2.7	3.77	1.31	0.42	1.08	TRUE	TRUE	TRUE	3
P54920	NAPA Alpha-soluble NSF attachment protein	NAPA	3.32	2.7	2.49	0	0.98	0.37	TRUE	TRUE	TRUE	3
P55884	EIF3B Eukaryotic translation initiation factor 3 subunit	EIF3B	2.52	2.7	2.1	1.23	3.75	0.32	TRUE	TRUE	TRUE	3
Q07960	ARHGAP1 Rho GTPase-activating protein 1	ARHGAP1	2.08	2.7	2.06	0.32	7.15	0.26	TRUE	TRUE	TRUE	3
Q99543	DNAJC2 DnaJ homolog subfamily C member 2	DNAJC2	2.72	2.69	2.38	0	0	0.59	TRUE	TRUE	TRUE	3
Q08257	CRYZ Quinone oxidoreductase	CRYZ	10.99	2.69	2.09	0	1.16	0.36	TRUE	TRUE	TRUE	3
P49321	NASP Nuclear autoantigenic sperm protein	NASP	2.94	2.68	2.3	7.05	0.04	0.46	TRUE	TRUE	TRUE	3
P78347	GTF2I General transcription factor II-I	GTF2I	2.4	2.68	2.16	0.91	0.66	0.47	TRUE	TRUE	TRUE	3
Q9H4M9	EHD1 EH domain-containing protein 1	EHD1	3.51	2.67	2.25	0.55	7.64	0.54	TRUE	TRUE	TRUE	3
P02786	TFRC Transferrin receptor protein 1	TFRC	2.58	2.67	2.2	0.37	3.65	3.64	TRUE	TRUE	TRUE	3
Q9NVA2	SEPT11 Septin-11	2017-09-11	2.67	2.66	2.39	0.64	0.6	2.29	TRUE	TRUE	TRUE	3
Q15046	KARS Lysine--tRNA ligase	KARS	2.57	2.66	2.15	2.96	0.69	0.61	TRUE	TRUE	TRUE	3
P63244	GNB2L1 Guanine nucleotide-binding protein subunit beta-2-	GNB2L1	2.64	2.66	2.03	0.7	2.76	1.25	TRUE	TRUE	TRUE	3
P04632	CAPNS1 Calpain small subunit 1	CAPNS1	2.22	2.66	2.15	0.16	0.24	0.41	TRUE	TRUE	TRUE	3
P54819	AK2 Adenylate kinase 2, mitochondrial	AK2	2.75	2.65	2.39	0.53	0.98	2.81	TRUE	TRUE	TRUE	3
Q99615	DNAJC7 DnaJ homolog subfamily C member 7	DNAJC7	3.21	2.65	2.02	0.35	0.35	0.3	TRUE	TRUE	TRUE	3
P11142	HSPA8 Heat shock cognate 71 kDa protein	HSPA8	2.54	2.64	2.05	1.74	1.92	1.59	TRUE	TRUE	TRUE	3
Q9P0V9	SEPT10 Septin-10	2017-09-10	2.66	2.64	2.04	0.16	0.62	2.85	TRUE	TRUE	TRUE	3
O14776	TCERG1 Transcription elongation regulator 1	TCERG1	2.63	2.64	2	5.02	0.62	0.86	TRUE	TRUE	TRUE	3
P00918	CA2 Carbonic anhydrase 2	CA2	2.18	2.64	2.48	2.58	0.86	0	TRUE	TRUE	TRUE	3
Q6IS14	EIF5AL1 Eukaryotic translation initiation factor 5A-1-like	EIF5AL1	2.95	2.63	2.5	6.08	0.2	0.53	TRUE	TRUE	TRUE	3
Q14320	FAM50A Protein FAM50A	FAM50A	3.13	2.63	2.37	1.23	1.4	0.19	TRUE	TRUE	TRUE	3
P22061	PCMT1 Protein-L-isoaspartate(D-aspartate) O-methyltransf	PCMT1	3.83	2.63	2.34	0	0.22	1.55	TRUE	TRUE	TRUE	3
P12081	HARS Histidine--tRNA ligase, cytoplasmic	HARS	2.61	2.63	2.25	0.76	0.67	0.41	TRUE	TRUE	TRUE	3
P60709	ACTB Actin, cytoplasmic 1	ACTB	2.59	2.63	2.12	1.62	0.36	0.59	TRUE	TRUE	TRUE	3
P08107	HSPA1B Heat shock 70 kDa protein 1A/1B	HSPA1B	2.52	2.63	2.09	0.46	2.28	0.44	TRUE	TRUE	TRUE	3
O75083	WDR1 WD repeat-containing protein 1	WDR1	2.34	2.63	2.04	2.24	2.79	0.38	TRUE	TRUE	TRUE	3
Q8NHV4	NEDD1 Protein NEDD1	NEDD1	2.06	2.62	8.36	0	0.01	9.4	TRUE	TRUE	TRUE	3
P49590	HARS2 Probable histidine--tRNA ligase, mitochondrial	HARS2	2.62	2.62	2.22	2.56	3.76	5.22	TRUE	TRUE	TRUE	3
Q13126	MTAP S-methyl-5-thioadenosine phosphorylase	MTAP	2.78	2.62	2.03	0.56	0.27	0.44	TRUE	TRUE	TRUE	3
P46783	RPS10 40S ribosomal protein S10	RPS10	2.63	2.62	2.02	0.64	0.4	0.26	TRUE	TRUE	TRUE	3
Q53FA3	HSPA1L Heat shock 70kDa protein 1-like variant	HSPA1L	2.54	2.62	2.02	0.4	1.56	0.34	TRUE	TRUE	TRUE	3
O43615	TIMM44 Mitochondrial import inner membrane translocase su	TIMM44	2.13	2.61	2.71	0.33	0.32	0.17	TRUE	TRUE	TRUE	3
P08195	SLC3A2 4F2 cell-surface antigen heavy chain	SLC3A2	2.87	2.61	2.23	0.4	0.91	0.89	TRUE	TRUE	TRUE	3
P52292	KPNA2 Importin subunit alpha-2	KPNA2	2.57	2.61	2	0.3	1	0.34	TRUE	TRUE	TRUE	3
O95816	BAG2 BAG family molecular chaperone regulator 2	BAG2	2.1	2.61	2.2	0.08	0.4	0.37	TRUE	TRUE	TRUE	3
P17812	CTPS1 CTP synthase 1	CTPS1	2.58	2.6	2.37	1.1	0.71	0.49	TRUE	TRUE	TRUE	3
P40926	MDH2 Malate dehydrogenase, mitochondrial	MDH2	3.05	2.6	2.26	0.61	0.97	0.5	TRUE	TRUE	TRUE	3
Q9NR30	DDX21 Nucleolar RNA helicase 2	DDX21	2.4	2.6	2.11	5	2.94	4.16	TRUE	TRUE	TRUE	3
Q7Z4S6	KIF21A Kinesin-like protein KIF21A	KIF21A	7.05	2.59	2.27	0	0	0.77	TRUE	TRUE	TRUE	3
P13639	EEF2 Elongation factor 2	EEF2	2.57	2.59	2.1	2.14	1.04	0.76	TRUE	TRUE	TRUE	3
O75390	CS Citrate synthase, mitochondrial	CS	2.56	2.59	2.04	0.41	0.36	0.59	TRUE	TRUE	TRUE	3
Q9Y4G6	TLN2 Talin-2	TLN2	2.26	2.59	2.14	0.53	0.34	0.42	TRUE	TRUE	TRUE	3
O00299	CLIC1 Chloride intracellular channel protein 1	CLIC1	2.85	2.58	2.33	0.59	0.31	0.27	TRUE	TRUE	TRUE	3
Q9GZV4	EIF5A2 Eukaryotic translation initiation factor 5A-2	EIF5A2	2.95	2.58	2.12	6.23	0.4	0.64	TRUE	TRUE	TRUE	3
Q92688	ANP32B Acidic leucine-rich nuclear phosphoprotein 32 fami	ANP32B	3.28	2.58	2.09	4.31	1.42	5.75	TRUE	TRUE	TRUE	3
P34897	SHMT2 Serine hydroxymethyltransferase, mitochondrial	SHMT2	2.55	2.58	2.08	1.67	0.59	0.54	TRUE	TRUE	TRUE	3
Q86UE4	MTDH Protein LYRIC	MTDH	5.21	2.58	2.06	2.54	0	0.47	TRUE	TRUE	TRUE	3
P52888	THOP1 Thimet oligopeptidase	THOP1	3.37	2.57	2.54	0	4.05	0.87	TRUE	TRUE	TRUE	3
P49588	AARS Alanine--tRNA ligase, cytoplasmic	AARS	2.66	2.57	2.15	0.75	2.21	0.4	TRUE	TRUE	TRUE	3
P35232	PHB Prohibitin	PHB	2.9	2.56	2.33	0.49	0.67	0.28	TRUE	TRUE	TRUE	3
P42167	TMPO Lamina-associated polypeptide 2, isoforms beta/gam	TMPO	3.19	2.56	2.28	2.78	7.2	0.76	TRUE	TRUE	TRUE	3
Q9Y490	TLN1 Talin-1	TLN1	2.55	2.56	2.24	1.11	2.12	0.45	TRUE	TRUE	TRUE	3
Q01518	CAP1 Adenylyl cyclase-associated protein 1	CAP1	2.59	2.56	2.19	0.35	1.06	0.35	TRUE	TRUE	TRUE	3
P17066	HSPA6 Heat shock 70 kDa protein 6	HSPA6	2.54	2.56	2.1	0.5	0.49	0.52	TRUE	TRUE	TRUE	3
P08237	PFKM 6-phosphofructokinase, muscle type	PFKM	2.72	2.56	2	1.29	2.91	0.42	TRUE	TRUE	TRUE	3
P30050	RPL12 60S ribosomal protein L12	RPL12	2.49	2.56	2.08	0.74	0.36	0.27	TRUE	TRUE	TRUE	3
P52895	AKR1C2 Aldo-keto reductase family 1 member C2	AKR1C2	3.07	2.54	2.3	3.56	0.46	0.35	TRUE	TRUE	TRUE	3
P42330	AKR1C3 Aldo-keto reductase family 1 member C3	AKR1C3	2.65	2.54	2.3	0.32	0.67	0.39	TRUE	TRUE	TRUE	3
Q8N684	CPSF7 Cleavage and polyadenylation specificity factor su	CPSF7	3.75	2.54	2.24	1.34	0.6	3.3	TRUE	TRUE	TRUE	3
Q9Y617	PSAT1 Phosphoserine aminotransferase	PSAT1	2.5	2.54	2.09	0.28	4.04	0.37	TRUE	TRUE	TRUE	3
P36957	DLST Dihydrolipoyllysine-residue succinyltransferase co	DLST	3.4	2.54	2.08	0.78	0.67	1.03	TRUE	TRUE	TRUE	3
P22059	OSBP Oxysterol-binding protein 1	OSBP	2	2.54	2.02	0	0	0.6	TRUE	TRUE	TRUE	3
P25685	DNAJB1 DnaJ homolog subfamily B member 1	DNAJB1	2.19	2.54	2.01	0.33	0.57	0.83	TRUE	TRUE	TRUE	3
P30085	CMPK1 UMP-CMP kinase	CMPK1	2.7	2.53	5.05	0	0.21	3.68	TRUE	TRUE	TRUE	3
Q14019	COTL1 Coactosin-like protein	COTL1	15	2.53	3.51	0	0	1.64	TRUE	TRUE	TRUE	3
P57721	PCBP3 Poly(rC)-binding protein 3	PCBP3	2.27	2.53	2.26	0.82	0.48	0.13	TRUE	TRUE	TRUE	3
P55072	VCP Transitional endoplasmic reticulum ATPase	VCP	2.36	2.53	2.18	0.48	0.54	0.48	TRUE	TRUE	TRUE	3
Q15365	PCBP1 Poly(rC)-binding protein 1	PCBP1	2.27	2.53	2.18	0.45	0.53	0.48	TRUE	TRUE	TRUE	3
P60900	PSMA6 Proteasome subunit alpha type-6	PSMA6	3.29	2.52	2.94	0.61	0.67	0.76	TRUE	TRUE	TRUE	3
Q9H444	CHMP4B Charged multivesicular body protein 4b	CHMP4B	2.88	2.52	2.58	0.26	0	0.09	TRUE	TRUE	TRUE	3
Q08945	SSRP1 FACT complex subunit SSRP1	SSRP1	3.6	2.52	2.46	1.42	0.58	0.41	TRUE	TRUE	TRUE	3
P62081	RPS7 40S ribosomal protein S7	RPS7	4.18	2.52	2.33	2.14	1.01	0.11	TRUE	TRUE	TRUE	3
Q99829	CPNE1 Copine-1	CPNE1	2.09	2.52	2.2	0	0.5	0.35	TRUE	TRUE	TRUE	3
P34896	SHMT1 Serine hydroxymethyltransferase, cytosolic	SHMT1	2.8	2.51	2.1	0.96	0.71	0.26	TRUE	TRUE	TRUE	3
Q12797	ASPH Aspartyl/asparaginyl beta-hydroxylase	ASPH	2.46	2.51	2.06	0.6	5.71	5.32	TRUE	TRUE	TRUE	3
P32119	PRDX2 Peroxiredoxin-2	PRDX2	2.59	2.5	2	0.63	0.71	0.22	TRUE	TRUE	TRUE	3
Q14192	FHL2 Four and a half LIM domains protein 2	FHL2	2.41	2.5	2.01	0	0.3	0.16	TRUE	TRUE	TRUE	3
P04083	ANXA1 Annexin A1	ANXA1	2.68	2.49	2.05	0.43	0.58	0.53	TRUE	TRUE	TRUE	3
P61106	RAB14 Ras-related protein Rab-14	RAB14	2.68	2.47	2.06	0.24	0.83	0.37	TRUE	TRUE	TRUE	3
P37108	SRP14 Signal recognition particle 14 kDa protein	SRP14	3.24	2.47	2	1.02	0.57	0.8	TRUE	TRUE	TRUE	3
Q562R1	ACTBL2 Beta-actin-like protein 2	ACTBL2	2.49	2.46	2.25	0.56	0.33	0.71	TRUE	TRUE	TRUE	3
Q9Y3F4	STRAP Serine-threonine kinase receptor-associated protei	STRAP	2.31	2.46	2.16	1.31	0.93	0.6	TRUE	TRUE	TRUE	3
Q9UJS0	SLC25A13 Calcium-binding mitochondrial carrier protein Aral	SLC25A13	2.14	2.46	2.05	0.51	0.43	0.87	TRUE	TRUE	TRUE	3
O00151	PDLIM1 PDZ and LIM domain protein 1	PDLIM1	10	2.45	3.25	0	0	1.79	TRUE	TRUE	TRUE	3
P21281	ATP6V1B2 V-type proton ATPase subunit B, brain isoform	ATP6V1B2	3.19	2.45	2.43	0.93	0.79	0.75	TRUE	TRUE	TRUE	3
Q9Y277	VDAC3 Voltage-dependent anion-selective channel protein	VDAC3	3.14	2.45	2.18	0.22	0.11	0.44	TRUE	TRUE	TRUE	3
O75821	EIF3G Eukaryotic translation initiation factor 3 subunit	EIF3G	2.5	2.45	2.05	0.27	0.77	1.27	TRUE	TRUE	TRUE	3
P11387	TOP1 DNA topoisomerase 1	TOP1	7.37	2.44	2	6.88	0.89	0.57	TRUE	TRUE	TRUE	3
P21291	CSRP1 Cysteine and glycine-rich protein 1	CSRP1	2.94	2.43	2.42	0.66	0.44	0.46	TRUE	TRUE	TRUE	3
P48739	PITPNB Phosphatidylinositol transfer protein beta isoform	PITPNB	5.77	2.43	2.36	3.9	7.27	0.91	TRUE	TRUE	TRUE	3
P25788	PSMA3 Proteasome subunit alpha type-3	PSMA3	3.96	2.43	2.29	0.91	1.08	0.53	TRUE	TRUE	TRUE	3
P40123	CAP2 Adenylyl cyclase-associated protein 2	CAP2	2.63	2.43	2.22	1.16	0.08	3.37	TRUE	TRUE	TRUE	3
P08559	PDHA1 Pyruvate dehydrogenase E1 component subunit alpha,	PDHA1	2.4	2.43	2.13	0.37	0.67	2.92	TRUE	TRUE	TRUE	3
P10768	ESD S-formylglutathione hydrolase	ESD	3.24	2.42	3.6	1.53	0.27	1.95	TRUE	TRUE	TRUE	3
P16152	CBR1 Carbonyl reductase	CBR1	2.85	2.42	2.3	0.69	1.01	0.51	TRUE	TRUE	TRUE	3
P36776	LONP1 Lon protease homolog, mitochondrial	LONP1	2.75	2.42	2	0.56	0.92	0.27	TRUE	TRUE	TRUE	3
Q15366	PCBP2 Poly(rC)-binding protein 2	PCBP2	2.27	2.42	2.08	1.07	0.52	0.25	TRUE	TRUE	TRUE	3
P50213	IDH3A Isocitrate dehydrogenase	IDH3A	3.35	2.41	2.18	0.74	1.17	1.45	TRUE	TRUE	TRUE	3
P00492	HPRT1 Hypoxanthine-guanine phosphoribosyltransferase	HPRT1	2.64	2.41	2.09	0.7	1.47	0.81	TRUE	TRUE	TRUE	3
P52565	ARHGDIA Rho GDP-dissociation inhibitor 1	ARHGDIA	3.05	2.4	2.72	0.29	5.21	1.14	TRUE	TRUE	TRUE	3
P26006	ITGA3 Integrin alpha-3	ITGA3	2.79	2.39	2.14	1.26	0.66	0.03	TRUE	TRUE	TRUE	3
P09874	PARP1 Poly	PARP1	2.41	2.39	2.32	3.89	0.56	0.55	TRUE	TRUE	TRUE	3
P13010	XRCC5 X-ray repair cross-complementing protein 5	XRCC5	2.49	2.39	2.06	0.56	1.13	0.46	TRUE	TRUE	TRUE	3
Q15149	PLEC Plectin	PLEC	2.27	2.39	2.05	2.16	0.66	1.87	TRUE	TRUE	TRUE	3
P51553	IDH3G Isocitrate dehydrogenase	IDH3G	3.18	2.38	2.1	0.74	0.16	0.42	TRUE	TRUE	TRUE	3
P62140	PPP1CB Serine/threonine-protein phosphatase PP1-beta cata	PPP1CB	2.44	2.38	2.16	0.78	0.77	0.25	TRUE	TRUE	TRUE	3
P27694	RPA1 Replication protein A 70 kDa DNA-binding subunit	RPA1	2.78	2.37	2.45	4.06	0.33	0.6	TRUE	TRUE	TRUE	3
P30838	ALDH3A1 Aldehyde dehydrogenase, dimeric NADP-preferring	ALDH3A1	3.87	2.36	2.29	0.79	0.61	0.75	TRUE	TRUE	TRUE	3
P10155	TROVE2 60 kDa SS-A/Ro ribonucleoprotein	TROVE2	2.68	2.36	2.11	0.49	0.47	0.93	TRUE	TRUE	TRUE	3
Q9NUQ3	TXLNG Gamma-taxilin	TXLNG	2.15	2.36	2	0.21	1.15	0.98	TRUE	TRUE	TRUE	3
Q9UNH7	SNX6 Sorting nexin-6	SNX6	4.79	2.35	2.1	0	0.27	0.6	TRUE	TRUE	TRUE	3
Q7L0Y3	TRMT10C Mitochondrial ribonuclease P protein 1	TRMT10C	2.99	2.34	2.21	1.29	0.24	0.41	TRUE	TRUE	TRUE	3
P09211	GSTP1 Glutathione S-transferase P	GSTP1	2.51	2.34	2.11	0.26	1.46	0.22	TRUE	TRUE	TRUE	3
Q7RTV0	PHF5A PHD finger-like domain-containing protein 5A	PHF5A	2.91	2.34	2	0	0	0.16	TRUE	TRUE	TRUE	3
Q16881	TXNRD1 Thioredoxin reductase 1, cytoplasmic	TXNRD1	2.29	2.33	2.24	0.96	1.77	0.84	TRUE	TRUE	TRUE	3
O00148	DDX39A ATP-dependent RNA helicase DDX39A	DDX39A	2.28	2.32	2.17	0.26	2.25	0.55	TRUE	TRUE	TRUE	3
P05556	ITGB1 Integrin beta-1	ITGB1	2.65	2.31	2.09	0.59	0.49	0.43	TRUE	TRUE	TRUE	3
Q15075	EEA1 Early endosome antigen 1	EEA1	7.63	2.29	2.56	7.33	1.2	3.94	TRUE	TRUE	TRUE	3
P19623	SRM Spermidine synthase	SRM	2.86	2.29	2.5	0.81	0.02	0.18	TRUE	TRUE	TRUE	3
P52907	CAPZA1 F-actin-capping protein subunit alpha-1	CAPZA1	2.75	2.29	2.11	0.2	4.54	0.38	TRUE	TRUE	TRUE	3
P51659	HSD17B4 Peroxisomal multifunctional enzyme type 2	HSD17B4	2.54	2.29	2.02	0.75	1	0.59	TRUE	TRUE	TRUE	3
P31939	ATIC Bifunctional purine biosynthesis protein PURH	ATIC	2.34	2.29	2	0.52	0.38	0.57	TRUE	TRUE	TRUE	3
O00764	PDXK Pyridoxal kinase	PDXK	2.32	2.28	2.78	0.91	0.4	0.89	TRUE	TRUE	TRUE	3
P53041	PPP5C Serine/threonine-protein phosphatase 5	PPP5C	2.53	2.27	2.1	0.23	0.79	0.28	TRUE	TRUE	TRUE	3
P18754	RCC1 Regulator of chromosome condensation	RCC1	2.96	2.27	2.09	0.25	0.24	0.2	TRUE	TRUE	TRUE	3
P43243	MATR3 Matrin-3	MATR3	2.72	2.25	2.23	0.71	0.86	0.68	TRUE	TRUE	TRUE	3
P15559	NQO1 NAD(P)H dehydrogenase	NQO1	2.56	2.25	2.08	0.32	0.94	0.34	TRUE	TRUE	TRUE	3
P48163	ME1 NADP-dependent malic enzyme	ME1	2.23	2.25	2.05	0.09	0.45	2.78	TRUE	TRUE	TRUE	3
Q13409	DYNC1I2 Cytoplasmic dynein 1 intermediate chain 2	DYNC1I2	2.27	2.24	2.03	0.4	0	0.72	TRUE	TRUE	TRUE	3
Q13464	ROCK1 Rho-associated protein kinase 1	ROCK1	6.03	2.23	2	0	1.96	0.59	TRUE	TRUE	TRUE	3
Q9GZT8	NIF3L1 NIF3-like protein 1	NIF3L1	4.59	2.22	2.84	0	0.03	1.32	TRUE	TRUE	TRUE	3
P31689	DNAJA1 DnaJ homolog subfamily A member 1	DNAJA1	2.32	2.22	2.05	0.41	0.56	5.41	TRUE	TRUE	TRUE	3
Q12933	TRAF2 TNF receptor-associated factor 2	TRAF2	2.05	2.21	2.87	0	0	1.55	TRUE	TRUE	TRUE	3
P49589	CARS Cysteine--tRNA ligase, cytoplasmic	CARS	2.31	2.2	2.02	0.77	0.46	0.23	TRUE	TRUE	TRUE	3
P62136	PPP1CA Serine/threonine-protein phosphatase PP1-alpha cat	PPP1CA	2.5	2.19	2.12	0.59	0.8	0.42	TRUE	TRUE	TRUE	3
P15328	FOLR1 Folate receptor alpha	FOLR1	2.47	2.19	2.45	0.22	0.44	0.79	TRUE	TRUE	TRUE	3
Q1KMD3	HNRNPUL2 Heterogeneous nuclear ribonucleoprotein U-like pro	HNRNPUL2	2.4	2.19	2.1	0.65	1.24	2.12	TRUE	TRUE	TRUE	3
Q6WCQ1	MPRIP Myosin phosphatase Rho-interacting protein	MPRIP	2.5	2.16	2.04	0.16	0	1.03	TRUE	TRUE	TRUE	3
Q9NR45	NANS Sialic acid synthase	NANS	2.37	2.14	2.34	0.63	0.41	0.34	TRUE	TRUE	TRUE	3
Q9NXG2	THUMPD1 THUMP domain-containing protein 1	THUMPD1	2.48	2.13	2.52	0	0.2	0	TRUE	TRUE	TRUE	3
Q15031	LARS2 Probable leucine--tRNA ligase, mitochondrial	LARS2	2.79	2.13	2.03	1.11	1.03	0.29	TRUE	TRUE	TRUE	3
P26440	IVD Isovaleryl-CoA dehydrogenase, mitochondrial	IVD	2.25	2.13	2.11	0	0.24	0.62	TRUE	TRUE	TRUE	3
P52943	CRIP2 Cysteine-rich protein 2	CRIP2	2.4	2.13	2.01	0.43	0.54	0.37	TRUE	TRUE	TRUE	3
E9PPU0	EPPK1 Epiplakin	EPPK1	2.16	2.12	2.2	1.39	2.34	5.86	TRUE	TRUE	TRUE	3
Q15397	KIAA0020 Pumilio domain-containing protein KIAA0020	KIAA0020	15	2.11	2.16	0	6.78	0.16	TRUE	TRUE	TRUE	3
Q01130	SRSF2 Serine/arginine-rich splicing factor 2	SRSF2	2.61	2.1	2.11	1.13	0	0	TRUE	TRUE	TRUE	3
P22087	FBL rRNA 2-O-methyltransferase fibrillarin	FBL	2.25	2.1	2.18	0.12	0.13	0.36	TRUE	TRUE	TRUE	3
Q9H9A6	LRRC40 Leucine-rich repeat-containing protein 40	LRRC40	2.29	2.09	2.9	0	0.07	0.21	TRUE	TRUE	TRUE	3
P04179	SOD2 Superoxide dismutase	SOD2	8.75	2.08	2.09	8.83	5.29	0.73	TRUE	TRUE	TRUE	3
P13797	PLS3 Plastin-3	PLS3	2.49	2.08	2.19	1.05	0.33	2.09	TRUE	TRUE	TRUE	3
P49591	SARS Serine--tRNA ligase, cytoplasmic	SARS	2.31	2.08	2.05	0.23	0.33	0.57	TRUE	TRUE	TRUE	3
Q9BTE6	AARSD1 Alanyl-tRNA editing protein Aarsd1	AARSD1	2.13	2.07	8.46	0.28	0	9.25	TRUE	TRUE	TRUE	3
P46821	MAP1B Microtubule-associated protein 1B	MAP1B	2.12	2.07	2.46	0.13	0.51	4.08	TRUE	TRUE	TRUE	3
Q15257	PPP2R4 Serine/threonine-protein phosphatase 2A activator	PPP2R4	2.48	2.06	2.28	0.81	0.8	0.92	TRUE	TRUE	TRUE	3
Q14116	IL18 Interleukin-18	IL18	3.24	2.05	3.05	0	0	0	TRUE	TRUE	TRUE	3
Q0VDF9	HSPA14 Heat shock 70 kDa protein 14	HSPA14	9.11	2.04	2.42	7.54	1.38	0.57	TRUE	TRUE	TRUE	3
P17858	PFKL 6-phosphofructokinase, liver type	PFKL	2.59	2.04	2.22	0.32	1.36	4.98	TRUE	TRUE	TRUE	3
Q14141	SEPT6 Septin-6	2017-09-06	2.67	2.03	2.49	0	1.87	0.62	TRUE	TRUE	TRUE	3
P11908	PRPS2 Ribose-phosphate pyrophosphokinase 2	PRPS2	2	2.02	2.2	1.81	0.52	0.64	TRUE	TRUE	TRUE	3
Q15417	CNN3 Calponin-3	CNN3	2.21	2.01	2	0.62	0.35	5.12	TRUE	TRUE	TRUE	3
Reverse_P16066	NPR1 Atrial natriuretic peptide receptor 1	NPR1	0	15	13.75	0	0	0	FALSE	TRUE	TRUE	2
Q8IYB7	DIS3L2 DIS3-like exonuclease 2	DIS3L2	0	15	4.84	0	0	0	FALSE	TRUE	TRUE	2
Q14157	UBAP2L Ubiquitin-associated protein 2-like	UBAP2L	1.73	15	2.29	0	0	0.44	FALSE	TRUE	TRUE	2
Q86VS8	HOOK3 Protein Hook homolog 3	HOOK3	0	15	2.18	0	0	0.35	FALSE	TRUE	TRUE	2
P82675	MRPS5 28S ribosomal protein S5, mitochondrial	MRPS5	7.3	13.82	0	0	0	0	TRUE	TRUE	FALSE	2
Q14554	PDIA5 Protein disulfide-isomerase A5	PDIA5	4.17	11.97	0	2.45	0	0	TRUE	TRUE	FALSE	2
Q2NL82	TSR1 Pre-rRNA-processing protein TSR1 homolog	TSR1	3.37	11.88	1.6	0	4.41	0.6	TRUE	TRUE	FALSE	2
Q9BWD1	ACAT2 Acetyl-CoA acetyltransferase, cytosolic	ACAT2	3.1	11.58	1.57	0.91	0	0.42	TRUE	TRUE	FALSE	2
Q4V328	GRIPAP1 GRIP1-associated protein 1	GRIPAP1	0	11.19	5.35	0	5.4	6.62	FALSE	TRUE	TRUE	2
Q9BT09	CNPY3 Protein canopy homolog 3	CNPY3	0	11	15	0	5.66	0	FALSE	TRUE	TRUE	2
P20340	RAB6A Ras-related protein Rab-6A	RAB6A	4.66	9.93	0	0	7.17	0	TRUE	TRUE	FALSE	2
Q8WXF1	PSPC1 Paraspeckle component 1	PSPC1	7.72	9.8	0	7.09	7.36	0	TRUE	TRUE	FALSE	2
P06753	TPM3 Tropomyosin alpha-3 chain	TPM3	7.49	8.95	0	0	8.56	0	TRUE	TRUE	FALSE	2
Q96PZ0	PUS7 Pseudouridylate synthase 7 homolog	PUS7	0	8.93	2.08	0	8.4	0.99	FALSE	TRUE	TRUE	2
O14579	COPE Coatomer subunit epsilon	COPE	0	8.59	2.38	0	9.07	0	FALSE	TRUE	TRUE	2
O14654	IRS4 Insulin receptor substrate 4	IRS4	0	8.26	7.57	0	9.53	10.51	FALSE	TRUE	TRUE	2
O75937	DNAJC8 DnaJ homolog subfamily C member 8	DNAJC8	3.89	7.76	0	0.6	6.74	0	TRUE	TRUE	FALSE	2
Q9Y2Z0	SUGT1 Suppressor of G2 allele of SKP1 homolog	SUGT1	0	7.5	3.4	0	0	1.63	FALSE	TRUE	TRUE	2
O43852	CALU Calumenin	CALU	2.85	7.41	1.16	7.62	3.94	0.08	TRUE	TRUE	FALSE	2
Q96E11	MRRF Ribosome-recycling factor, mitochondrial	MRRF	4.46	7.31	0.43	1.58	0	0	TRUE	TRUE	FALSE	2
Q8IWJ2	GCC2 GRIP and coiled-coil domain-containing protein 2	GCC2	0	7.2	2.13	0	5.15	0.34	FALSE	TRUE	TRUE	2
Q9Y4P3	TBL2 Transducin beta-like protein 2	TBL2	2.64	6.54	1.79	0	6.92	0.06	TRUE	TRUE	FALSE	2
P55145	MANF Mesencephalic astrocyte-derived neurotrophic facto	MANF	3.33	6.28	0	0.11	2.67	0	TRUE	TRUE	FALSE	2
Q8IX12	CCAR1 Cell division cycle and apoptosis regulator protei	CCAR1	1.76	5.8	2.02	0	0.59	0.77	FALSE	TRUE	TRUE	2
Q14696	MESDC2 LDLR chaperone MESD	MESDC2	3.77	5.61	0	0.72	0	0	TRUE	TRUE	FALSE	2
P54578	USP14 Ubiquitin carboxyl-terminal hydrolase 14	USP14	0	5.34	2.92	0	6.1	0.42	FALSE	TRUE	TRUE	2
O75323	GBAS Protein NipSnap homolog 2	GBAS	4.36	5.12	0	4.03	0	0	TRUE	TRUE	FALSE	2
P35270	SPR Sepiapterin reductase	SPR	2.63	4.94	0	0	0	0	TRUE	TRUE	FALSE	2
O95218	ZRANB2 Zinc finger Ran-binding domain-containing protein	ZRANB2	2.21	4.82	1.54	7.43	2.35	1.49	TRUE	TRUE	FALSE	2
Q01469	FABP5 Fatty acid-binding protein, epidermal	FABP5	1.99	4.76	4.15	0	1.84	0.08	FALSE	TRUE	TRUE	2
Q9NUJ1	ABHD10 Abhydrolase domain-containing protein 10, mitochon	ABHD10	15	4.56	0	0	0	0	TRUE	TRUE	FALSE	2
Q9NY33	DPP3 Dipeptidyl peptidase 3	DPP3	3.16	4.55	1.65	1.81	2.62	0.59	TRUE	TRUE	FALSE	2
P67809	YBX1 Nuclease-sensitive element-binding protein 1	YBX1	2.88	4.49	1.91	0	6.62	0	TRUE	TRUE	FALSE	2
Q8IWS0	PHF6 PHD finger protein 6	PHF6	0	4.49	2.44	0	4.81	0.89	FALSE	TRUE	TRUE	2
Q14103	HNRNPD Heterogeneous nuclear ribonucleoprotein D0	HNRNPD	2.65	4.48	1.96	0.27	5.5	0.99	TRUE	TRUE	FALSE	2
Q00169	PITPNA Phosphatidylinositol transfer protein alpha isofor	PITPNA	0	4.45	2.17	0	0	0.69	FALSE	TRUE	TRUE	2
Q15056	EIF4H Eukaryotic translation initiation factor 4H	EIF4H	0	4.38	2.71	0	4.29	0	FALSE	TRUE	TRUE	2
P31937	HIBADH 3-hydroxyisobutyrate dehydrogenase, mitochondrial	HIBADH	2.88	4.14	1.71	0.08	0	0.2	TRUE	TRUE	FALSE	2
P49585	PCYT1A Choline-phosphate cytidylyltransferase A	PCYT1A	0	4.12	4.26	0	6.17	0	FALSE	TRUE	TRUE	2
O60437	PPL Periplakin	PPL	2.12	4.09	1.74	0	1.04	0.68	TRUE	TRUE	FALSE	2
P51665	PSMD7 26S proteasome non-ATPase regulatory subunit 7	PSMD7	0	4.06	2.34	0	0.22	0.84	FALSE	TRUE	TRUE	2
Q9BRX2	PELO Protein pelota homolog	PELO	7.22	4.04	0	6.78	1.03	0	TRUE	TRUE	FALSE	2
Q86TU7	SETD3 Histone-lysine N-methyltransferase setd3	SETD3	2.49	4.03	0	1	0	0	TRUE	TRUE	FALSE	2
Q6ZXV5	TMTC3 Transmembrane and TPR repeat-containing protein 3	TMTC3	0	4.02	2.27	0	0	0	FALSE	TRUE	TRUE	2
P35251	RFC1 Replication factor C subunit 1	RFC1	0	3.94	2.28	0	2.92	0	FALSE	TRUE	TRUE	2
O00139	KIF2A Kinesin-like protein KIF2A	KIF2A	0	3.86	2.05	0	2.62	0.27	FALSE	TRUE	TRUE	2
Q9Y2W2	WBP11 WW domain-binding protein 11	WBP11	0	3.85	3.61	0	1.66	2.23	FALSE	TRUE	TRUE	2
Q96E39	RBMXL1 RNA binding motif protein, X-linked-like-1	RBMXL1	3.94	3.84	0	0.88	0.38	0	TRUE	TRUE	FALSE	2
Q9Y6D9	MAD1L1 Mitotic spindle assembly checkpoint protein MAD1	MAD1L1	3.02	3.79	1.94	0	0	0.23	TRUE	TRUE	FALSE	2
Q9Y4L1	HYOU1 Hypoxia up-regulated protein 1	HYOU1	0.57	3.78	2.75	1.77	1.3	2.81	FALSE	TRUE	TRUE	2
P10412	HIST1H1E Histone H1.4	HIST1H1E	2.99	3.76	1.88	2.51	0.82	0.86	TRUE	TRUE	FALSE	2
P16402	HIST1H1D Histone H1.3	HIST1H1D	2.99	3.76	1.88	2.51	0.82	0.86	TRUE	TRUE	FALSE	2
P16403	HIST1H1C Histone H1.2	HIST1H1C	2.99	3.76	1.88	2.51	0.82	0.86	TRUE	TRUE	FALSE	2
Q15738	NSDHL Sterol-4-alpha-carboxylate 3-dehydrogenase, decarb	NSDHL	3.52	3.75	1.91	0	5.13	4.25	TRUE	TRUE	FALSE	2
P41240	CSK Tyrosine-protein kinase CSK	CSK	0	3.73	2.32	0	0	0	FALSE	TRUE	TRUE	2
Q13868	EXOSC2 Exosome complex component RRP4	EXOSC2	0	3.71	15	0	0.52	0	FALSE	TRUE	TRUE	2
P05388	RPLP0 60S acidic ribosomal protein P0	RPLP0	3.21	3.7	1.89	1.67	3.21	0.58	TRUE	TRUE	FALSE	2
Q9BQ69	MACROD1 O-acetyl-ADP-ribose deacetylase MACROD1	MACROD1	0	3.69	2.9	0	0.64	0.71	FALSE	TRUE	TRUE	2
A1X283	SH3PXD2B SH3 and PX domain-containing protein 2B	SH3PXD2B	9.16	3.66	0	0	0	0	TRUE	TRUE	FALSE	2
Q9NTK5	OLA1 Obg-like ATPase 1	OLA1	0	3.65	2.43	0	0.99	0.21	FALSE	TRUE	TRUE	2
Q9UBE0	SAE1 SUMO-activating enzyme subunit 1	SAE1	1.61	3.64	2.54	1.92	1.62	0.26	FALSE	TRUE	TRUE	2
P19525	EIF2AK2 Interferon-induced, double-stranded RNA-activated	EIF2AK2	0	3.61	2.52	0	5.32	0.44	FALSE	TRUE	TRUE	2
Q9H307	PNN Pinin	PNN	2.74	3.6	1.98	0	0.58	0.28	TRUE	TRUE	FALSE	2
Q15796	SMAD2 Mothers against decapentaplegic homolog 2	SMAD2	2.29	3.59	1.88	0.09	0	0.16	TRUE	TRUE	FALSE	2
P32456	GBP2 Interferon-induced guanylate-binding protein 2	GBP2	0	3.58	2.03	0	3.29	0.06	FALSE	TRUE	TRUE	2
P99999	CYCS Cytochrome c	CYCS	0	3.57	3.67	0	1.58	0.21	FALSE	TRUE	TRUE	2
Q05639	EEF1A2 Elongation factor 1-alpha 2	EEF1A2	0	3.57	2.45	0	3.48	0.98	FALSE	TRUE	TRUE	2
O00471	EXOC5 Exocyst complex component 5	EXOC5	15	3.56	1.6	0	0	0.13	TRUE	TRUE	FALSE	2
P20073	ANXA7 Annexin A7	ANXA7	3.79	3.55	1.84	1.11	0.59	0.49	TRUE	TRUE	FALSE	2
P61020	RAB5B Ras-related protein Rab-5B	RAB5B	0	3.5	2.17	0	0	0.5	FALSE	TRUE	TRUE	2
Q92673	SORL1 Sortilin-related receptor	SORL1	8.08	3.48	0	0	0	0	TRUE	TRUE	FALSE	2
Q9Y450	HBS1L HBS1-like protein	HBS1L	2.32	3.48	1.92	0	1.18	0.91	TRUE	TRUE	FALSE	2
Q6UXN9	WDR82 WD repeat-containing protein 82	WDR82	15	3.46	1.73	0	7.27	6.04	TRUE	TRUE	FALSE	2
Q9UBU9	NXF1 Nuclear RNA export factor 1	NXF1	0	3.46	2.24	0	0	0.48	FALSE	TRUE	TRUE	2
P62269	RPS18 40S ribosomal protein S18	RPS18	2.93	3.43	1.58	0	6.17	0.09	TRUE	TRUE	FALSE	2
Q9Y2T3	GDA Guanine deaminase	GDA	0	3.41	6.32	0	1.26	4.82	FALSE	TRUE	TRUE	2
O14602	EIF1AY Eukaryotic translation initiation factor 1A, Y-chr	EIF1AY	8.78	3.41	0	0	0	0	TRUE	TRUE	FALSE	2
Q02543	RPL18A 60S ribosomal protein L18a	RPL18A	2.49	3.4	1.94	0.48	0.93	0.42	TRUE	TRUE	FALSE	2
Q9BVP2	GNL3 Guanine nucleotide-binding protein-like 3	GNL3	2.45	3.39	1.77	0.35	1.13	0.35	TRUE	TRUE	FALSE	2
P13674	P4HA1 Prolyl 4-hydroxylase subunit alpha-1	P4HA1	1.87	3.37	2.19	0.49	0.3	0.18	FALSE	TRUE	TRUE	2
Q9Y2Z4	YARS2 Tyrosine--tRNA ligase, mitochondrial	YARS2	0	3.36	2.28	0	0.34	0.31	FALSE	TRUE	TRUE	2
Q15054	POLD3 DNA polymerase delta subunit 3	POLD3	1.53	3.35	2.87	0	0	1.52	FALSE	TRUE	TRUE	2
P49257	LMAN1 Protein ERGIC-53	LMAN1	2.86	3.35	1.71	0.19	1.91	0.29	TRUE	TRUE	FALSE	2
Q96A33	CCDC47 Coiled-coil domain-containing protein 47	CCDC47	0	3.34	2.59	0	0.86	0	FALSE	TRUE	TRUE	2
Q9UJU6	DBNL Drebrin-like protein	DBNL	2.54	3.33	1.65	0.59	0.58	0.24	TRUE	TRUE	FALSE	2
Q08379	GOLGA2 Golgin subfamily A member 2	GOLGA2	2.57	3.29	1.78	0.41	1.98	0.27	TRUE	TRUE	FALSE	2
P61289	PSME3 Proteasome activator complex subunit 3	PSME3	4.19	3.28	1.9	5.35	0.36	0.16	TRUE	TRUE	FALSE	2
Q96GG9	DCUN1D1 DCN1-like protein 1	DCUN1D1	4.22	3.26	0	0	0	0	TRUE	TRUE	FALSE	2
O95433	AHSA1 Activator of 90 kDa heat shock protein ATPase homo	AHSA1	1.9	3.24	2.47	0.12	0.13	0	FALSE	TRUE	TRUE	2
P13693	TPT1 Translationally-controlled tumor protein	TPT1	0	3.24	2.18	0	0.47	0	FALSE	TRUE	TRUE	2
Q9BZI7	UPF3B Regulator of nonsense transcripts 3B	UPF3B	0	3.23	2.51	0	0.24	0	FALSE	TRUE	TRUE	2
P20810	CAST Calpastatin	CAST	2.75	3.23	1.94	0.9	2.68	3.27	TRUE	TRUE	FALSE	2
Q9BZK7	TBL1XR1 F-box-like/WD repeat-containing protein TBL1XR1	TBL1XR1	0	3.21	2.88	0	0.25	5.62	FALSE	TRUE	TRUE	2
Q14254	FLOT2 Flotillin-2	FLOT2	8	3.19	1.62	2.77	0.81	0	TRUE	TRUE	FALSE	2
P17612	PRKACA cAMP-dependent protein kinase catalytic subunit al	PRKACA	2.66	3.18	1.42	0.49	0.55	0.1	TRUE	TRUE	FALSE	2
P83731	RPL24 60S ribosomal protein L24	RPL24	2.56	3.17	1.66	0.59	0.81	0.2	TRUE	TRUE	FALSE	2
P62424	RPL7A 60S ribosomal protein L7a	RPL7A	2.32	3.16	1.9	0.63	0.68	0.8	TRUE	TRUE	FALSE	2
O43148	RNMT mRNA cap guanine-N7 methyltransferase	RNMT	2.81	3.15	1.97	1.92	0.91	0.88	TRUE	TRUE	FALSE	2
P13861	PRKAR2A cAMP-dependent protein kinase type II-alpha regula	PRKAR2A	3.13	3.12	1.32	0.13	0.23	0.69	TRUE	TRUE	FALSE	2
Q16822	PCK2 Phosphoenolpyruvate carboxykinase	PCK2	2.94	3.12	0	0	1.22	0	TRUE	TRUE	FALSE	2
P35269	GTF2F1 General transcription factor IIF subunit 1	GTF2F1	1.16	3.11	2.42	0	0	0	FALSE	TRUE	TRUE	2
Q9H9J2	MRPL44 39S ribosomal protein L44, mitochondrial	MRPL44	3.19	3.1	1.42	0	1.18	0	TRUE	TRUE	FALSE	2
P50914	RPL14 60S ribosomal protein L14	RPL14	2.41	3.1	1.52	1.02	0.51	0.44	TRUE	TRUE	FALSE	2
Q9BQA1	WDR77 Methylosome protein 50	WDR77	0	3.09	3.8	0	0	0	FALSE	TRUE	TRUE	2
P42766	RPL35 60S ribosomal protein L35	RPL35	3.03	3.09	0	0	0.23	0	TRUE	TRUE	FALSE	2
Q14155	ARHGEF7 Rho guanine nucleotide exchange factor 7	ARHGEF7	0	3.09	2.42	0	0	0	FALSE	TRUE	TRUE	2
Q12931	TRAP1 Heat shock protein 75 kDa, mitochondrial	TRAP1	2.49	3.09	1.95	0.66	0.86	0.32	TRUE	TRUE	FALSE	2
Q86UP2	KTN1 Kinectin	KTN1	2.57	3.08	1.94	3.81	0.47	0.31	TRUE	TRUE	FALSE	2
P62899	RPL31 60S ribosomal protein L31	RPL31	2.36	3.07	1.83	0.26	0.41	0.45	TRUE	TRUE	FALSE	2
P09488	GSTM1 Glutathione S-transferase Mu 1	GSTM1	0	3.04	3.08	0	0.63	1.55	FALSE	TRUE	TRUE	2
Q9UNP9	PPIE Peptidyl-prolyl cis-trans isomerase E	PPIE	0	3.04	2.84	0	0	0.28	FALSE	TRUE	TRUE	2
Q969N2	PIGT GPI transamidase component PIG-T	PIGT	0	3.03	4.48	0	0.83	0	FALSE	TRUE	TRUE	2
Q9UG63	ABCF2 ATP-binding cassette sub-family F member 2	ABCF2	2.55	2.99	1.84	1.51	0	0.09	TRUE	TRUE	FALSE	2
P14550	AKR1A1 Alcohol dehydrogenase	AKR1A1	6.76	2.98	1.89	0	0	0.38	TRUE	TRUE	FALSE	2
Q96FW1	OTUB1 Ubiquitin thioesterase OTUB1	OTUB1	2.77	2.98	1.69	0.35	0.27	0.21	TRUE	TRUE	FALSE	2
Q9Y606	PUS1 tRNA pseudouridine synthase A, mitochondrial	PUS1	0	2.98	2.4	0	0	0	FALSE	TRUE	TRUE	2
Q05048	CSTF1 Cleavage stimulation factor subunit 1	CSTF1	0	2.98	2.4	0	2.1	0	FALSE	TRUE	TRUE	2
Q9H0U4	RAB1B Ras-related protein Rab-1B	RAB1B	2.17	2.97	1.51	0.35	1.03	0.18	TRUE	TRUE	FALSE	2
O95757	HSPA4L Heat shock 70 kDa protein 4L	HSPA4L	2.89	2.96	1.92	1.56	0.32	0.69	TRUE	TRUE	FALSE	2
Q6FI81	CIAPIN1 Anamorsin	CIAPIN1	1.93	2.96	2.26	0	1.13	0.08	FALSE	TRUE	TRUE	2
Q9Y230	RUVBL2 RuvB-like 2	RUVBL2	2.71	2.95	1.73	0.55	0.87	0.25	TRUE	TRUE	FALSE	2
P09104	ENO2 Gamma-enolase	ENO2	0	2.94	2.61	0	0.31	0.04	FALSE	TRUE	TRUE	2
P40222	TXLNA Alpha-taxilin	TXLNA	2.52	2.94	1.99	0.97	0.36	0.24	TRUE	TRUE	FALSE	2
P07910	HNRNPC Heterogeneous nuclear ribonucleoproteins C1/C2	HNRNPC	3.11	2.94	1.64	1.21	0.68	0.44	TRUE	TRUE	FALSE	2
P24539	ATP5F1 ATP synthase subunit b, mitochondrial	ATP5F1	2.57	2.93	1.86	0.16	0.63	0.38	TRUE	TRUE	FALSE	2
P39687	ANP32A Acidic leucine-rich nuclear phosphoprotein 32 fami	ANP32A	0	2.93	2.34	0	0	0.35	FALSE	TRUE	TRUE	2
Q07021	C1QBP Complement component 1 Q subcomponent-binding prot	C1QBP	2.21	2.93	1.81	4.58	0.36	0.17	TRUE	TRUE	FALSE	2
P62851	RPS25 40S ribosomal protein S25	RPS25	2.37	2.92	1.85	0.16	2.38	0.75	TRUE	TRUE	FALSE	2
A6NHR9	SMCHD1 Structural maintenance of chromosomes flexible hin	SMCHD1	7.82	2.9	1.62	10.15	0	0	TRUE	TRUE	FALSE	2
P27797	CALR Calreticulin	CALR	2.05	2.9	1.64	0.34	0.59	0.35	TRUE	TRUE	FALSE	2
P09493	TPM1 Tropomyosin alpha-1 chain	TPM1	0	2.89	2.79	0	0	1.05	FALSE	TRUE	TRUE	2
O15305	PMM2 Phosphomannomutase 2	PMM2	0	2.89	2.26	0	0.07	0.32	FALSE	TRUE	TRUE	2
O14920	IKBKB Inhibitor of nuclear factor kappa-B kinase subunit	IKBKB	0	2.89	2.24	0	0	0.66	FALSE	TRUE	TRUE	2
P35249	RFC4 Replication factor C subunit 4	RFC4	2.33	2.89	0	0.53	0.47	0	TRUE	TRUE	FALSE	2
Q9P289	MST4 Serine/threonine-protein kinase MST4	MST4	0	2.88	2.52	0	0.63	0.25	FALSE	TRUE	TRUE	2
Q9UKS6	PACSIN3 Protein kinase C and casein kinase substrate in ne	PACSIN3	0	2.88	2.51	0	6.11	0.82	FALSE	TRUE	TRUE	2
Q92878	RAD50 DNA repair protein RAD50	RAD50	2.7	2.88	1.88	0.55	0.98	0.91	TRUE	TRUE	FALSE	2
O95239	KIF4A Chromosome-associated kinesin KIF4A	KIF4A	2.54	2.88	1.85	0.63	0.42	0.33	TRUE	TRUE	FALSE	2
P29144	TPP2 Tripeptidyl-peptidase 2	TPP2	1.93	2.88	2.02	2.89	3.98	0.43	FALSE	TRUE	TRUE	2
Q9Y3U8	RPL36 60S ribosomal protein L36	RPL36	2.13	2.88	1.8	0.08	0.22	0.26	TRUE	TRUE	FALSE	2
P49755	TMED10 Transmembrane emp24 domain-containing protein 10	TMED10	2.51	2.87	1.92	0.59	0.04	0.14	TRUE	TRUE	FALSE	2
P52594	AGFG1 Arf-GAP domain and FG repeat-containing protein 1	AGFG1	0	2.87	2.18	0	1.05	0.49	FALSE	TRUE	TRUE	2
Q8IXB1	DNAJC10 DnaJ homolog subfamily C member 10	DNAJC10	0	2.87	2.05	0	0.54	0	FALSE	TRUE	TRUE	2
Q9Y6E2	BZW2 Basic leucine zipper and W2 domain-containing prot	BZW2	2.68	2.86	1.63	0	0.41	0.11	TRUE	TRUE	FALSE	2
O75367	H2AFY Core histone macro-H2A.1	H2AFY	2.7	2.85	1.98	0.47	5.38	0.32	TRUE	TRUE	FALSE	2
Q14126	DSG2 Desmoglein-2	DSG2	3.99	2.85	1.68	2.43	0.61	0.69	TRUE	TRUE	FALSE	2
O43237	DYNC1LI2 Cytoplasmic dynein 1 light intermediate chain 2	DYNC1LI2	3.28	2.85	0.84	0.47	0.01	1.09	TRUE	TRUE	FALSE	2
O75569	PRKRA Interferon-inducible double stranded RNA-dependent	PRKRA	0	2.85	2.08	0	0	0	FALSE	TRUE	TRUE	2
Q14980	NUMA1 Nuclear mitotic apparatus protein 1	NUMA1	2.2	2.84	1.9	1.34	3.25	2.41	TRUE	TRUE	FALSE	2
Q92900	UPF1 Regulator of nonsense transcripts 1	UPF1	1.4	2.83	2.1	0	0.28	0.48	FALSE	TRUE	TRUE	2
P11216	PYGB Glycogen phosphorylase, brain form	PYGB	3.25	2.82	1.82	1.44	7.09	0.09	TRUE	TRUE	FALSE	2
Q5SSJ5	HP1BP3 Heterochromatin protein 1-binding protein 3	HP1BP3	2.8	2.82	1.66	5.71	0.74	5.09	TRUE	TRUE	FALSE	2
Q06323	PSME1 Proteasome activator complex subunit 1	PSME1	2.73	2.82	0	0	1.65	0	TRUE	TRUE	FALSE	2
P61163	ACTR1A Alpha-centractin	ACTR1A	1.67	2.82	2.05	0	0.04	0.05	FALSE	TRUE	TRUE	2
Q9BQ39	DDX50 ATP-dependent RNA helicase DDX50	DDX50	0	2.82	2.04	0	0.2	0.29	FALSE	TRUE	TRUE	2
Q9UJX3	ANAPC7 Anaphase-promoting complex subunit 7	ANAPC7	0	2.81	2.7	0	0	0.39	FALSE	TRUE	TRUE	2
P60174	TPI1 Triosephosphate isomerase	TPI1	2.94	2.81	1.9	0.78	0.7	0.57	TRUE	TRUE	FALSE	2
P53004	BLVRA Biliverdin reductase A	BLVRA	0	2.81	2.31	0	0.54	0.04	FALSE	TRUE	TRUE	2
Q9NWU5	MRPL22 39S ribosomal protein L22, mitochondrial	MRPL22	0	2.81	2.12	0	0	0	FALSE	TRUE	TRUE	2
P09651	HNRNPA1 Heterogeneous nuclear ribonucleoprotein A1	HNRNPA1	2.73	2.8	1.81	0.44	0.74	0.47	TRUE	TRUE	FALSE	2
Q15233	NONO Non-POU domain-containing octamer-binding protein	NONO	2.67	2.8	1.79	0.36	0.44	0.41	TRUE	TRUE	FALSE	2
Q9NQ88	TIGAR Fructose-2,6-bisphosphatase TIGAR	TIGAR	0	2.8	2.21	0	0.34	0.35	FALSE	TRUE	TRUE	2
Q02809	PLOD1 Procollagen-lysine,2-oxoglutarate 5-dioxygenase 1	PLOD1	2.22	2.79	1.74	0.42	0.4	1.56	TRUE	TRUE	FALSE	2
Q13247	SRSF6 Serine/arginine-rich splicing factor 6	SRSF6	2.83	2.78	1.97	1.12	0.38	0	TRUE	TRUE	FALSE	2
P30405	PPIF Peptidyl-prolyl cis-trans isomerase F, mitochondri	PPIF	3.4	2.78	0	0.12	0.16	0	TRUE	TRUE	FALSE	2
Q96T51	RUFY1 RUN and FYVE domain-containing protein 1	RUFY1	0	2.76	15	0	0	7.67	FALSE	TRUE	TRUE	2
Q06787	FMR1 Fragile X mental retardation protein 1	FMR1	0	2.75	8.83	0	1.45	8.73	FALSE	TRUE	TRUE	2
Q07666	KHDRBS1 KH domain-containing, RNA-binding, signal transduc	KHDRBS1	2.61	2.75	1.94	0.18	0.75	0.14	TRUE	TRUE	FALSE	2
P61204	ARF3 ADP-ribosylation factor 3	ARF3	2.07	2.75	1.37	0.39	1.73	0.05	TRUE	TRUE	FALSE	2
P84077	ARF1 ADP-ribosylation factor 1	ARF1	2.07	2.75	1.37	0.39	1.73	0.05	TRUE	TRUE	FALSE	2
P31327	CPS1 Carbamoyl-phosphate synthase	CPS1	2.4	2.74	1.97	1.05	1.62	0.43	TRUE	TRUE	FALSE	2
P46782	RPS5 40S ribosomal protein S5	RPS5	2.15	2.74	1.88	0.63	0.36	0.58	TRUE	TRUE	FALSE	2
P62750	RPL23A 60S ribosomal protein L23a	RPL23A	2.4	2.74	1.73	0.54	1.53	0.33	TRUE	TRUE	FALSE	2
Q96KP4	CNDP2 Cytosolic non-specific dipeptidase	CNDP2	2.7	2.73	1.92	0.33	2.04	0.57	TRUE	TRUE	FALSE	2
O75152	ZC3H11A Zinc finger CCCH domain-containing protein 11A	ZC3H11A	2.72	2.73	1.78	0	0	1.42	TRUE	TRUE	FALSE	2
P62249	RPS16 40S ribosomal protein S16	RPS16	2.33	2.73	1.74	0.23	0.7	0.43	TRUE	TRUE	FALSE	2
Q9BQL6	FERMT1 Fermitin family homolog 1	FERMT1	2.16	2.73	1.49	0.25	1.56	0.06	TRUE	TRUE	FALSE	2
O95394	PGM3 Phosphoacetylglucosamine mutase	PGM3	2.6	2.72	0	0.24	0.3	0	TRUE	TRUE	FALSE	2
O95302	FKBP9 Peptidyl-prolyl cis-trans isomerase FKBP9	FKBP9	2.27	2.72	1.94	0.5	0	0.26	TRUE	TRUE	FALSE	2
P46060	RANGAP1 Ran GTPase-activating protein 1	RANGAP1	2.44	2.72	1.86	3.46	0.69	0.5	TRUE	TRUE	FALSE	2
Q6IBS0	TWF2 Twinfilin-2	TWF2	2.14	2.72	1.56	0	0.25	0.19	TRUE	TRUE	FALSE	2
P12270	TPR Nucleoprotein TPR	TPR	2.55	2.71	1.94	4.38	3.87	2.51	TRUE	TRUE	FALSE	2
Q9BS26	ERP44 Endoplasmic reticulum resident protein 44	ERP44	2.8	2.71	1.77	0.48	0.71	0.14	TRUE	TRUE	FALSE	2
P48059	LIMS1 LIM and senescent cell antigen-like-containing dom	LIMS1	1.8	2.71	2.04	1.06	1.3	7.52	FALSE	TRUE	TRUE	2
Q96TA1	FAM129B Niban-like protein 1	FAM129B	2.25	2.71	1.85	0.33	0.7	0.26	TRUE	TRUE	FALSE	2
Q16543	CDC37 Hsp90 co-chaperone Cdc37	CDC37	1.78	2.7	2.66	1.16	4.24	0.65	FALSE	TRUE	TRUE	2
Q9Y2Q3	GSTK1 Glutathione S-transferase kappa 1	GSTK1	2.68	2.7	1.94	0.86	0.05	0.33	TRUE	TRUE	FALSE	2
Q9UH62	ARMCX3 Armadillo repeat-containing X-linked protein 3	ARMCX3	3.07	2.7	0	0	7.12	0	TRUE	TRUE	FALSE	2
Q9H7Z7	PTGES2 Prostaglandin E synthase 2	PTGES2	2.69	2.7	0	0	0.3	0	TRUE	TRUE	FALSE	2
Q9H223	EHD4 EH domain-containing protein 4	EHD4	0	2.69	2.76	0	0	0.16	FALSE	TRUE	TRUE	2
O95861	BPNT1 3(2),5-bisphosphate nucleotidase 1	BPNT1	2.61	2.68	1.33	1.23	0.29	0	TRUE	TRUE	FALSE	2
P08670	VIM Vimentin	VIM	2.42	2.68	1.8	0.49	0.73	0.42	TRUE	TRUE	FALSE	2
Q99848	EBNA1BP2 Probable rRNA-processing protein EBP2	EBNA1BP2	2.23	2.68	0	1.07	0	0	TRUE	TRUE	FALSE	2
O15173	PGRMC2 Membrane-associated progesterone receptor componen	PGRMC2	2.63	2.67	1.9	0	0.16	0.38	TRUE	TRUE	FALSE	2
Q96KG9	SCYL1 N-terminal kinase-like protein	SCYL1	0	2.67	2.33	0	0.08	0.13	FALSE	TRUE	TRUE	2
P43246	MSH2 DNA mismatch repair protein Msh2	MSH2	2.28	2.67	1.92	0.35	0.98	0.32	TRUE	TRUE	FALSE	2
Q13573	SNW1 SNW domain-containing protein 1	SNW1	2.28	2.67	1.85	0	5.23	0.13	TRUE	TRUE	FALSE	2
P39019	RPS19 40S ribosomal protein S19	RPS19	2.18	2.67	1.75	0.42	0.25	0.36	TRUE	TRUE	FALSE	2
P62805	HIST4H4 Histone H4	HIST4H4	2.77	2.66	1.88	0.39	0.55	0.43	TRUE	TRUE	FALSE	2
Q7L5N1	COPS6 COP9 signalosome complex subunit 6	COPS6	2.88	2.66	1.62	0	0.11	0.28	TRUE	TRUE	FALSE	2
Q8IU85	CAMK1D Calcium/calmodulin-dependent protein kinase type 1	CAMK1D	2.54	2.66	0	0	0	0	TRUE	TRUE	FALSE	2
P49748	ACADVL Very long-chain specific acyl-CoA dehydrogenase, m	ACADVL	2.25	2.66	1.82	0.29	0.45	0.23	TRUE	TRUE	FALSE	2
Q96EY1	DNAJA3 DnaJ homolog subfamily A member 3, mitochondrial	DNAJA3	2.43	2.66	0	0	0	0	TRUE	TRUE	FALSE	2
P00338	LDHA L-lactate dehydrogenase A chain	LDHA	2.39	2.65	1.95	2.4	0.88	0.38	TRUE	TRUE	FALSE	2
P63167	DYNLL1 Dynein light chain 1, cytoplasmic	DYNLL1	2.02	2.65	1.7	0	1.4	0.28	TRUE	TRUE	FALSE	2
P24752	ACAT1 Acetyl-CoA acetyltransferase, mitochondrial	ACAT1	2.73	2.64	1.96	0.72	3.5	0.44	TRUE	TRUE	FALSE	2
Q9P0L0	VAPA Vesicle-associated membrane protein-associated pro	VAPA	2.64	2.64	1.9	0.18	0.13	0.38	TRUE	TRUE	FALSE	2
O75223	GGCT Gamma-glutamylcyclotransferase	GGCT	2.07	2.64	1.96	0	0.27	0	TRUE	TRUE	FALSE	2
Q16186	ADRM1 Proteasomal ubiquitin receptor ADRM1	ADRM1	2.61	2.63	1.92	0.45	0.54	0.04	TRUE	TRUE	FALSE	2
P27695	APEX1 DNA-(apurinic or apyrimidinic site) lyase	APEX1	2.81	2.63	1.83	3.08	0.63	0.87	TRUE	TRUE	FALSE	2
O43447	PPIH Peptidyl-prolyl cis-trans isomerase H	PPIH	2.81	2.63	0	0.32	0.22	0	TRUE	TRUE	FALSE	2
P30153	PPP2R1A Serine/threonine-protein phosphatase 2A 65 kDa reg	PPP2R1A	2.58	2.62	1.87	0.38	1.91	0.92	TRUE	TRUE	FALSE	2
P28074	PSMB5 Proteasome subunit beta type-5	PSMB5	2.2	2.62	1.78	0.73	0.45	0.45	TRUE	TRUE	FALSE	2
P30048	PRDX3 Thioredoxin-dependent peroxide reductase, mitochon	PRDX3	2.38	2.62	1.6	0.78	0.48	0.24	TRUE	TRUE	FALSE	2
Q93009	USP7 Ubiquitin carboxyl-terminal hydrolase 7	USP7	4.04	2.61	1.87	7.48	0.65	0.36	TRUE	TRUE	FALSE	2
P27824	CANX Calnexin	CANX	2.58	2.61	1.71	0.69	0.6	3.43	TRUE	TRUE	FALSE	2
P41091	EIF2S3 Eukaryotic translation initiation factor 2 subunit	EIF2S3	2.38	2.61	1.98	0.62	0.51	0.51	TRUE	TRUE	FALSE	2
Q9UBT2	UBA2 SUMO-activating enzyme subunit 2	UBA2	2.77	2.6	1.91	7.23	0.34	0.37	TRUE	TRUE	FALSE	2
P51148	RAB5C Ras-related protein Rab-5C	RAB5C	2.47	2.6	1.92	0.31	0.7	0.33	TRUE	TRUE	FALSE	2
J3QL51	RPL17-C18ORF32 Protein RPL17-C18ORF32	RPL17-C18ORF32	2.04	2.6	1.5	0.46	0.37	0.32	TRUE	TRUE	FALSE	2
P18621	RPL17 60S ribosomal protein L17	RPL17	2.04	2.6	1.5	0.46	0.37	0.32	TRUE	TRUE	FALSE	2
Q15424	SAFB Scaffold attachment factor B1	SAFB	1.91	2.59	2.88	0	0.4	0.66	FALSE	TRUE	TRUE	2
Q8WVM8	SCFD1 Sec1 family domain-containing protein 1	SCFD1	0	2.59	2.33	0	0.55	0.53	FALSE	TRUE	TRUE	2
P49915	GMPS GMP synthase	GMPS	2.31	2.59	1.88	3.26	0.67	0.46	TRUE	TRUE	FALSE	2
Q7L1Q6	BZW1 Basic leucine zipper and W2 domain-containing prot	BZW1	2.49	2.59	1.83	0.51	1.11	4.2	TRUE	TRUE	FALSE	2
Q9UKG1	APPL1 DCC-interacting protein 13-alpha	APPL1	0	2.58	2.24	0	0.21	0.66	FALSE	TRUE	TRUE	2
O94874	UFL1 E3 UFM1-protein ligase 1	UFL1	0	2.58	2.11	0	1.73	1.04	FALSE	TRUE	TRUE	2
Q9NV70	EXOC1 Exocyst complex component 1	EXOC1	0	2.58	2.02	0	0.02	0.04	FALSE	TRUE	TRUE	2
P09543	CNP 2,3-cyclic-nucleotide 3-phosphodiesterase	CNP	2.42	2.58	1.69	0	0.66	0.46	TRUE	TRUE	FALSE	2
Q00059	TFAM Transcription factor A, mitochondrial	TFAM	0	2.57	2.06	0	0.79	0.4	FALSE	TRUE	TRUE	2
Q00839	HNRNPU Heterogeneous nuclear ribonucleoprotein U	HNRNPU	2.34	2.57	1.89	2.56	2.84	0.26	TRUE	TRUE	FALSE	2
O15355	PPM1G Protein phosphatase 1G	PPM1G	2.12	2.57	1.75	0.37	0.37	0.73	TRUE	TRUE	FALSE	2
Q7L2H7	EIF3M Eukaryotic translation initiation factor 3 subunit	EIF3M	2.08	2.57	1.7	0.47	0.57	1.18	TRUE	TRUE	FALSE	2
P06493	CDK1 Cyclin-dependent kinase 1	CDK1	2.57	2.56	1.92	0.47	0.2	0.23	TRUE	TRUE	FALSE	2
P42166	TMPO Lamina-associated polypeptide 2, isoform alpha	TMPO	2.56	2.56	1.86	2.23	4.69	0.48	TRUE	TRUE	FALSE	2
Q08170	SRSF4 Serine/arginine-rich splicing factor 4	SRSF4	2.5	2.56	0	0.72	0.3	0	TRUE	TRUE	FALSE	2
P55084	HADHB Trifunctional enzyme subunit beta, mitochondrial	HADHB	2.47	2.56	1.97	0.43	0.78	0	TRUE	TRUE	FALSE	2
P23246	SFPQ Splicing factor, proline- and glutamine-rich	SFPQ	2.31	2.56	1.94	4.24	3.63	0.3	TRUE	TRUE	FALSE	2
Q96QC0	PPP1R10 Serine/threonine-protein phosphatase 1 regulatory	PPP1R10	0	2.55	3.24	0	0	0	FALSE	TRUE	TRUE	2
Q96P16	RPRD1A Regulation of nuclear pre-mRNA domain-containing p	RPRD1A	0	2.55	2.35	0	0	0	FALSE	TRUE	TRUE	2
O75400	PRPF40A Pre-mRNA-processing factor 40 homolog A	PRPF40A	2.8	2.54	1.9	1.19	0.94	0.63	TRUE	TRUE	FALSE	2
Q10471	GALNT2 Polypeptide N-acetylgalactosaminyltransferase 2	GALNT2	2.61	2.54	1.9	0.66	1.65	1.13	TRUE	TRUE	FALSE	2
Q9UKF6	CPSF3 Cleavage and polyadenylation specificity factor su	CPSF3	2.24	2.54	0	0	0	0	TRUE	TRUE	FALSE	2
P07737	PFN1 Profilin-1	PFN1	2.7	2.53	1.9	0.78	0.29	0.46	TRUE	TRUE	FALSE	2
Q3YEC7	RABL6 Rab-like protein 6	RABL6	0	2.52	2.75	0	0	0.42	FALSE	TRUE	TRUE	2
P57053	H2BFS Histone H2B type F-S	H2BFS	2.5	2.52	1.79	0.35	4.62	0.23	TRUE	TRUE	FALSE	2
Q5QNW6	HIST2H2BF Histone H2B type 2-F	HIST2H2BF	2.5	2.52	1.79	0.35	4.62	0.23	TRUE	TRUE	FALSE	2
Q99879	HIST1H2BM Histone H2B type 1-M	HIST1H2BM	2.5	2.52	1.79	0.35	4.62	0.23	TRUE	TRUE	FALSE	2
Q99880	HIST1H2BL Histone H2B type 1-L	HIST1H2BL	2.5	2.52	1.79	0.35	4.62	0.23	TRUE	TRUE	FALSE	2
Q92890	UFD1L Ubiquitin fusion degradation protein 1 homolog	UFD1L	2.93	2.52	0	0	0	0	TRUE	TRUE	FALSE	2
Q96G03	PGM2 Phosphoglucomutase-2	PGM2	0	2.52	2.11	0	0.61	0.24	FALSE	TRUE	TRUE	2
P07814	EPRS Bifunctional glutamate/proline--tRNA ligase	EPRS	2.29	2.52	1.82	2.05	2.71	1.02	TRUE	TRUE	FALSE	2
O43242	PSMD3 26S proteasome non-ATPase regulatory subunit 3	PSMD3	2.41	2.52	1.81	0.78	0.34	0.3	TRUE	TRUE	FALSE	2
Q16778	HIST2H2BE Histone H2B type 2-E	HIST2H2BE	2.37	2.52	1.7	0.81	5.09	0.19	TRUE	TRUE	FALSE	2
P23368	ME2 NAD-dependent malic enzyme, mitochondrial	ME2	1.85	2.51	2.65	0.72	0.6	0	FALSE	TRUE	TRUE	2
Q13155	AIMP2 Aminoacyl tRNA synthase complex-interacting multif	AIMP2	2.55	2.51	1.85	5.09	0.78	0.24	TRUE	TRUE	FALSE	2
P30533	LRPAP1 Alpha-2-macroglobulin receptor-associated protein	LRPAP1	2.5	2.51	1.71	0.47	0.37	0.2	TRUE	TRUE	FALSE	2
P61224	RAP1B Ras-related protein Rap-1b	RAP1B	2.81	2.51	1.6	0.76	0.43	0.39	TRUE	TRUE	FALSE	2
Q9NR56	MBNL1 Muscleblind-like protein 1	MBNL1	5.29	2.5	0	0	0	0	TRUE	TRUE	FALSE	2
Q99598	TSNAX Translin-associated protein X	TSNAX	0	2.5	2.08	0	0	0.13	FALSE	TRUE	TRUE	2
Q9H3S7	PTPN23 Tyrosine-protein phosphatase non-receptor type 23	PTPN23	0	2.5	2.01	0	0	0	FALSE	TRUE	TRUE	2
P50990	CCT8 T-complex protein 1 subunit theta	CCT8	2.37	2.5	1.94	1.35	2.19	2.25	TRUE	TRUE	FALSE	2
P55735	SEC13 Protein SEC13 homolog	SEC13	2.12	2.5	1.85	0.16	0.24	0.17	TRUE	TRUE	FALSE	2
P04843	RPN1 Dolichyl-diphosphooligosaccharide--protein glycosy	RPN1	2.27	2.5	1.73	0.41	3.12	3.56	TRUE	TRUE	FALSE	2
Q9UI10	EIF2B4 Translation initiation factor eIF-2B subunit delta	EIF2B4	2.39	2.5	1.66	0	1.12	0.42	TRUE	TRUE	FALSE	2
Q15717	ELAVL1 ELAV-like protein 1	ELAVL1	2.09	2.5	1.64	0.41	0.42	0.46	TRUE	TRUE	FALSE	2
Q6UB35	MTHFD1L Monofunctional C1-tetrahydrofolate synthase, mitoc	MTHFD1L	2.04	2.5	1.56	0.79	0.73	0.65	TRUE	TRUE	FALSE	2
O60701	UGDH UDP-glucose 6-dehydrogenase	UGDH	2.58	2.49	1.96	0.49	0.31	0.32	TRUE	TRUE	FALSE	2
Q15404	RSU1 Ras suppressor protein 1	RSU1	2.84	2.49	1.67	0.29	0.57	0.54	TRUE	TRUE	FALSE	2
Q96CX2	KCTD12 BTB/POZ domain-containing protein KCTD12	KCTD12	4.95	2.49	1.53	1.96	0.12	0	TRUE	TRUE	FALSE	2
Q9Y295	DRG1 Developmentally-regulated GTP-binding protein 1	DRG1	2.17	2.49	1.83	0.61	0.35	0.3	TRUE	TRUE	FALSE	2
O15145	ARPC3 Actin-related protein 2/3 complex subunit 3	ARPC3	2.34	2.49	1.65	0.09	0.28	0.46	TRUE	TRUE	FALSE	2
P62917	RPL8 60S ribosomal protein L8	RPL8	2.28	2.49	1.64	1.05	0.27	0.31	TRUE	TRUE	FALSE	2
P11172	UMPS Uridine 5-monophosphate synthase	UMPS	0	2.48	2.67	0	0	0.87	FALSE	TRUE	TRUE	2
O43837	IDH3B Isocitrate dehydrogenase	IDH3B	3.54	2.48	0	0.9	7.46	0	TRUE	TRUE	FALSE	2
Q9C0I1	MTMR12 Myotubularin-related protein 12	MTMR12	0	2.48	2.12	0	0.45	0.3	FALSE	TRUE	TRUE	2
P23526	AHCY Adenosylhomocysteinase	AHCY	2.46	2.48	1.81	0.64	0.78	0.49	TRUE	TRUE	FALSE	2
P61764	STXBP1 Syntaxin-binding protein 1	STXBP1	2.12	2.48	1.76	0.78	0.74	0.25	TRUE	TRUE	FALSE	2
Q13011	ECH1 Delta(3,5)-Delta(2,4)-dienoyl-CoA isomerase, mitoc	ECH1	2.13	2.47	1.99	5.29	0.79	0.38	TRUE	TRUE	FALSE	2
P68133	ACTA1 Actin, alpha skeletal muscle	ACTA1	2.4	2.47	1.94	0.56	0.29	0.58	TRUE	TRUE	FALSE	2
Q9NUU7	DDX19A ATP-dependent RNA helicase DDX19A	DDX19A	2.29	2.47	1.9	0.99	0.64	0.55	TRUE	TRUE	FALSE	2
Q9UMR2	DDX19B ATP-dependent RNA helicase DDX19B	DDX19B	2.29	2.47	1.81	0.42	0.64	0.39	TRUE	TRUE	FALSE	2
P39656	DDOST Dolichyl-diphosphooligosaccharide--protein glycosy	DDOST	2.79	2.46	1.91	0.3	0.44	0.44	TRUE	TRUE	FALSE	2
Q6PI48	DARS2 Aspartate--tRNA ligase, mitochondrial	DARS2	0	2.46	2.02	0	0	0	FALSE	TRUE	TRUE	2
P27816	MAP4 Microtubule-associated protein 4	MAP4	2.17	2.46	1.94	1.44	0.79	1.33	TRUE	TRUE	FALSE	2
P04844	RPN2 Dolichyl-diphosphooligosaccharide--protein glycosy	RPN2	2.05	2.46	1.79	0.79	2.06	0.18	TRUE	TRUE	FALSE	2
Q13557	CAMK2D Calcium/calmodulin-dependent protein kinase type I	CAMK2D	2.25	2.46	1.69	0.4	0.5	7.12	TRUE	TRUE	FALSE	2
P35998	PSMC2 26S protease regulatory subunit 7	PSMC2	2.51	2.45	1.72	1.16	0.54	0.64	TRUE	TRUE	FALSE	2
P27707	DCK Deoxycytidine kinase	DCK	3.7	2.45	0	0	0	0	TRUE	TRUE	FALSE	2
P61254	RPL26 60S ribosomal protein L26	RPL26	2.13	2.45	1.97	0.28	0.44	5.87	TRUE	TRUE	FALSE	2
Q5F1R6	DNAJC21 DnaJ homolog subfamily C member 21	DNAJC21	2.16	2.45	1.96	0	7.31	0.47	TRUE	TRUE	FALSE	2
Q9NZI8	IGF2BP1 Insulin-like growth factor 2 mRNA-binding protein	IGF2BP1	2.07	2.45	1.9	0.58	0.44	0.43	TRUE	TRUE	FALSE	2
Q13439	GOLGA4 Golgin subfamily A member 4	GOLGA4	0	2.44	3.17	0	3.07	0	FALSE	TRUE	TRUE	2
O14974	PPP1R12A Protein phosphatase 1 regulatory subunit 12A	PPP1R12A	2.52	2.44	1.83	0.29	3.38	0.78	TRUE	TRUE	FALSE	2
P51610	HCFC1 Host cell factor 1	HCFC1	2.42	2.44	1.83	0.85	0.54	0.35	TRUE	TRUE	FALSE	2
P28340	POLD1 DNA polymerase delta catalytic subunit	POLD1	2.16	2.44	1.82	0.19	0.3	0.45	TRUE	TRUE	FALSE	2
Q96AC1	FERMT2 Fermitin family homolog 2	FERMT2	2.25	2.44	1.65	0.21	1.2	0.3	TRUE	TRUE	FALSE	2
Q13630	TSTA3 GDP-L-fucose synthase	TSTA3	2.99	2.43	1.89	1.96	1	0.35	TRUE	TRUE	FALSE	2
P68371	TUBB4B Tubulin beta-4B chain	TUBB4B	2.5	2.43	1.85	0.42	0.38	0.29	TRUE	TRUE	FALSE	2
P98175	RBM10 RNA-binding protein 10	RBM10	3.71	2.43	0	0	1.32	0	TRUE	TRUE	FALSE	2
Q14203	DCTN1 Dynactin subunit 1	DCTN1	2.34	2.43	1.97	1.03	0.37	0.83	TRUE	TRUE	FALSE	2
P60228	EIF3E Eukaryotic translation initiation factor 3 subunit	EIF3E	2.11	2.43	1.69	0.35	0.6	0.28	TRUE	TRUE	FALSE	2
O60502	MGEA5 Bifunctional protein NCOAT	MGEA5	15	2.42	1.56	0	0.04	0.1	TRUE	TRUE	FALSE	2
P60891	PRPS1 Ribose-phosphate pyrophosphokinase 1	PRPS1	1.94	2.42	2.05	1.5	0.45	0.39	FALSE	TRUE	TRUE	2
P06737	PYGL Glycogen phosphorylase, liver form	PYGL	2.38	2.42	1.67	1.01	0.39	0.25	TRUE	TRUE	FALSE	2
P20290	BTF3 Transcription factor BTF3	BTF3	2.12	2.42	1.47	0.44	0	0	TRUE	TRUE	FALSE	2
Q9NTJ3	SMC4 Structural maintenance of chromosomes protein 4	SMC4	2.53	2.41	1.94	0.39	0.41	0.85	TRUE	TRUE	FALSE	2
Q9Y2X3	NOP58 Nucleolar protein 58	NOP58	5.43	2.41	1.92	3.39	0.53	0.44	TRUE	TRUE	FALSE	2
Q99567	NUP88 Nuclear pore complex protein Nup88	NUP88	2.65	2.41	1.86	7.29	0.61	0.41	TRUE	TRUE	FALSE	2
P42224	STAT1 Signal transducer and activator of transcription 1	STAT1	1.8	2.41	2.08	0.26	0.7	0.39	FALSE	TRUE	TRUE	2
P61158	ACTR3 Actin-related protein 3	ACTR3	2.63	2.4	1.94	0.46	3.67	0.72	TRUE	TRUE	FALSE	2
P51114	FXR1 Fragile X mental retardation syndrome-related prot	FXR1	2.65	2.4	1.83	0	1.21	0.03	TRUE	TRUE	FALSE	2
P43487	RANBP1 Ran-specific GTPase-activating protein	RANBP1	0	2.4	2.11	0	0.16	0	FALSE	TRUE	TRUE	2
P15880	RPS2 40S ribosomal protein S2	RPS2	2.06	2.4	1.93	0.41	0.48	0.94	TRUE	TRUE	FALSE	2
Q9Y5K5	UCHL5 Ubiquitin carboxyl-terminal hydrolase isozyme L5	UCHL5	0	2.39	2.21	0	0.8	1.14	FALSE	TRUE	TRUE	2
P12268	IMPDH2 Inosine-5-monophosphate dehydrogenase 2	IMPDH2	2.25	2.39	1.75	0.98	0.48	0.32	TRUE	TRUE	FALSE	2
Q9BUJ2	HNRNPUL1 Heterogeneous nuclear ribonucleoprotein U-like pro	HNRNPUL1	2.09	2.39	1.68	0.23	1.62	0.26	TRUE	TRUE	FALSE	2
Q96RP9	GFM1 Elongation factor G, mitochondrial	GFM1	2.4	2.39	1.67	0.41	0.77	0.66	TRUE	TRUE	FALSE	2
O14929	HAT1 Histone acetyltransferase type B catalytic subunit	HAT1	2.09	2.39	1.48	0.71	4.54	0.22	TRUE	TRUE	FALSE	2
Q9Y3I0	C22orf28 tRNA-splicing ligase RtcB homolog	C22orf28	2.58	2.38	1.88	0.25	0.37	0.21	TRUE	TRUE	FALSE	2
Q13509	TUBB3 Tubulin beta-3 chain	TUBB3	2.5	2.38	1.82	0.47	0.38	0.32	TRUE	TRUE	FALSE	2
P43121	MCAM Cell surface glycoprotein MUC18	MCAM	2.52	2.38	1.6	0	0.43	0	TRUE	TRUE	FALSE	2
Q96DV4	MRPL38 39S ribosomal protein L38, mitochondrial	MRPL38	0	2.38	2.45	0	0	7.37	FALSE	TRUE	TRUE	2
Q06124	PTPN11 Tyrosine-protein phosphatase non-receptor type 11	PTPN11	1.87	2.38	2.2	0	0.42	0.36	FALSE	TRUE	TRUE	2
P46063	RECQL ATP-dependent DNA helicase Q1	RECQL	2.23	2.38	1.98	3.41	0.66	2.75	TRUE	TRUE	FALSE	2
P09972	ALDOC Fructose-bisphosphate aldolase C	ALDOC	2.17	2.38	1.9	0.35	0.22	0.19	TRUE	TRUE	FALSE	2
Q9BVA1	TUBB2B Tubulin beta-2B chain	TUBB2B	2.49	2.38	1.81	0.39	0.34	0.21	TRUE	TRUE	FALSE	2
P46940	IQGAP1 Ras GTPase-activating-like protein IQGAP1	IQGAP1	2.06	2.38	1.77	0.93	0.64	0.45	TRUE	TRUE	FALSE	2
Q14315	FLNC Filamin-C	FLNC	2.11	2.38	1.73	4.58	4.51	3.43	TRUE	TRUE	FALSE	2
O43395	PRPF3 U4/U6 small nuclear ribonucleoprotein Prp3	PRPF3	2.27	2.38	1.68	0.93	0.68	0.72	TRUE	TRUE	FALSE	2
P33316	DUT Deoxyuridine 5-triphosphate nucleotidohydrolase,	DUT	2.06	2.38	1.58	0.35	0.47	0.2	TRUE	TRUE	FALSE	2
P46781	RPS9 40S ribosomal protein S9	RPS9	2.13	2.38	1.46	4.25	3.66	4.11	TRUE	TRUE	FALSE	2
Q9NR46	SH3GLB2 Endophilin-B2	SH3GLB2	0	2.37	2.53	0	0	0	FALSE	TRUE	TRUE	2
P22234	PAICS Multifunctional protein ADE2	PAICS	2.69	2.37	1.98	0.51	0.66	0.27	TRUE	TRUE	FALSE	2
P45880	VDAC2 Voltage-dependent anion-selective channel protein	VDAC2	2.81	2.37	1.48	0.52	0.53	0.3	TRUE	TRUE	FALSE	2
Q5JRX3	PITRM1 Presequence protease, mitochondrial	PITRM1	2.26	2.37	1.92	0.6	4.57	1.45	TRUE	TRUE	FALSE	2
P35579	MYH9 Myosin-9	MYH9	2.25	2.37	1.81	0.49	1.75	0.4	TRUE	TRUE	FALSE	2
P61247	RPS3A 40S ribosomal protein S3a	RPS3A	2.19	2.37	1.76	0.32	0.55	0.51	TRUE	TRUE	FALSE	2
Q9UHB9	SRP68 Signal recognition particle 68 kDa protein	SRP68	2.16	2.37	1.66	0.93	0.72	0.77	TRUE	TRUE	FALSE	2
Q9H2G2	SLK STE20-like serine/threonine-protein kinase	SLK	2.32	2.37	1.5	0	0	0.75	TRUE	TRUE	FALSE	2
Q9NTX5	ECHDC1 Ethylmalonyl-CoA decarboxylase	ECHDC1	0	2.36	2.87	0	0	0	FALSE	TRUE	TRUE	2
P30043	BLVRB Flavin reductase (NADPH)	BLVRB	2.93	2.36	1.94	0	0.33	0.49	TRUE	TRUE	FALSE	2
Q9NP79	VTA1 Vacuolar protein sorting-associated protein VTA1 h	VTA1	0	2.36	2.07	0	0.46	0	FALSE	TRUE	TRUE	2
P07741	APRT Adenine phosphoribosyltransferase	APRT	2.36	2.36	1.25	0	0.34	0.93	TRUE	TRUE	FALSE	2
Q9NZ08	ERAP1 Endoplasmic reticulum aminopeptidase 1	ERAP1	3.55	2.35	1.5	0	0	0.16	TRUE	TRUE	FALSE	2
P49642	PRIM1 DNA primase small subunit	PRIM1	2.56	2.35	1.18	0.66	0	0.08	TRUE	TRUE	FALSE	2
P46459	NSF Vesicle-fusing ATPase	NSF	2.29	2.35	1.93	0.45	0.36	1.06	TRUE	TRUE	FALSE	2
O15143	ARPC1B Actin-related protein 2/3 complex subunit 1B	ARPC1B	2.09	2.35	1.69	1.15	0.25	0.21	TRUE	TRUE	FALSE	2
P62820	RAB1A Ras-related protein Rab-1A	RAB1A	2.4	2.35	1.52	0.57	0.75	0.15	TRUE	TRUE	FALSE	2
P12956	XRCC6 X-ray repair cross-complementing protein 6	XRCC6	2.52	2.34	1.86	2.01	0.56	2.01	TRUE	TRUE	FALSE	2
P13928	ANXA8 Annexin A8	ANXA8	0	2.34	2.47	0	0.2	1.28	FALSE	TRUE	TRUE	2
Q13107	USP4 Ubiquitin carboxyl-terminal hydrolase 4	USP4	0	2.34	2.35	0	0	0	FALSE	TRUE	TRUE	2
Q9Y4E8	USP15 Ubiquitin carboxyl-terminal hydrolase 15	USP15	0	2.34	2.35	0	0	0	FALSE	TRUE	TRUE	2
P61011	SRP54 Signal recognition particle 54 kDa protein	SRP54	0	2.34	2.33	0	0.64	0	FALSE	TRUE	TRUE	2
Q9H845	ACAD9 Acyl-CoA dehydrogenase family member 9, mitochondr	ACAD9	1.87	2.34	2.01	0.68	0.45	0.31	FALSE	TRUE	TRUE	2
Q14247	CTTN Src substrate cortactin	CTTN	2.17	2.34	1.94	0.71	3.84	2.78	TRUE	TRUE	FALSE	2
P62263	RPS14 40S ribosomal protein S14	RPS14	2.27	2.34	1.92	2.35	0.64	0.86	TRUE	TRUE	FALSE	2
P11586	MTHFD1 C-1-tetrahydrofolate synthase, cytoplasmic	MTHFD1	2.21	2.34	1.77	0.33	0.5	2.67	TRUE	TRUE	FALSE	2
Q12965	MYO1E Unconventional myosin-Ie	MYO1E	2.19	2.34	1.46	0	0.5	0.26	TRUE	TRUE	FALSE	2
P48729	CSNK1A1 Casein kinase I isoform alpha	CSNK1A1	7.07	2.33	1.56	6.88	0.24	0.31	TRUE	TRUE	FALSE	2
P49419	ALDH7A1 Alpha-aminoadipic semialdehyde dehydrogenase	ALDH7A1	2.01	2.33	1.87	0.3	0.47	0.44	TRUE	TRUE	FALSE	2
P26641	EEF1G Elongation factor 1-gamma	EEF1G	2.17	2.33	1.82	2.32	1.06	0.43	TRUE	TRUE	FALSE	2
Q02878	RPL6 60S ribosomal protein L6	RPL6	2.47	2.33	1.74	0.64	0.2	0.5	TRUE	TRUE	FALSE	2
P32969	RPL9P9 60S ribosomal protein L9	RPL9P9	2.48	2.33	1.63	0.65	0.46	0.52	TRUE	TRUE	FALSE	2
P62314	SNRPD1 Small nuclear ribonucleoprotein Sm D1	SNRPD1	2.3	2.33	0	0	0	0	TRUE	TRUE	FALSE	2
Q6NUK1	SLC25A24 Calcium-binding mitochondrial carrier protein SCaM	SLC25A24	2.2	2.32	1.87	0.14	0.17	0.38	TRUE	TRUE	FALSE	2
P07437	TUBB Tubulin beta chain	TUBB	2.34	2.32	1.85	0.41	0.36	0.27	TRUE	TRUE	FALSE	2
O76021	RSL1D1 Ribosomal L1 domain-containing protein 1	RSL1D1	2.38	2.32	1.84	0.81	0.27	0.37	TRUE	TRUE	FALSE	2
P33992	MCM5 DNA replication licensing factor MCM5	MCM5	2.07	2.32	1.81	0.34	1.38	0.38	TRUE	TRUE	FALSE	2
Q12792	TWF1 Twinfilin-1	TWF1	2.04	2.32	1.67	0.04	0.21	0.11	TRUE	TRUE	FALSE	2
P50570	DNM2 Dynamin-2	DNM2	2.59	2.31	1.9	0	0.12	0	TRUE	TRUE	FALSE	2
P23229	ITGA6 Integrin alpha-6	ITGA6	0	2.31	2.35	0	0	0	FALSE	TRUE	TRUE	2
O43818	RRP9 U3 small nucleolar RNA-interacting protein 2	RRP9	0	2.31	2.26	0	0	0	FALSE	TRUE	TRUE	2
Q14151	SAFB2 Scaffold attachment factor B2	SAFB2	1.91	2.31	2.23	0	0	0.27	FALSE	TRUE	TRUE	2
Q13596	SNX1 Sorting nexin-1	SNX1	2.42	2.31	1.99	0.5	0.94	0.84	TRUE	TRUE	FALSE	2
P06744	GPI Glucose-6-phosphate isomerase	GPI	2.13	2.31	1.69	0.6	2.55	0.22	TRUE	TRUE	FALSE	2
Q9NQ48	LZTFL1 Leucine zipper transcription factor-like protein 1	LZTFL1	0	2.3	3.23	0	0	0	FALSE	TRUE	TRUE	2
Q9UBQ5	EIF3K Eukaryotic translation initiation factor 3 subunit	EIF3K	0	2.3	2.25	0	0.46	0.4	FALSE	TRUE	TRUE	2
P48509	CD151 CD151 antigen	CD151	1.68	2.3	2.05	0.19	0	0	FALSE	TRUE	TRUE	2
P23921	RRM1 Ribonucleoside-diphosphate reductase large subunit	RRM1	2.4	2.3	1.98	3.09	3.23	3.17	TRUE	TRUE	FALSE	2
Q7Z2W4	ZC3HAV1 Zinc finger CCCH-type antiviral protein 1	ZC3HAV1	2.29	2.3	1.85	4.82	0.5	0.55	TRUE	TRUE	FALSE	2
P48637	GSS Glutathione synthetase	GSS	1.65	2.29	2.79	1.21	0.97	0.32	FALSE	TRUE	TRUE	2
P61006	RAB8A Ras-related protein Rab-8A	RAB8A	2.74	2.29	1.77	0.33	0.86	0.25	TRUE	TRUE	FALSE	2
P61019	RAB2A Ras-related protein Rab-2A	RAB2A	2.55	2.29	1.63	3.13	3.18	0.16	TRUE	TRUE	FALSE	2
P52306	RAP1GDS1 Rap1 GTPase-GDP dissociation stimulator 1	RAP1GDS1	10.16	2.29	1.62	6.84	0.37	0.39	TRUE	TRUE	FALSE	2
O96008	TOMM40 Mitochondrial import receptor subunit TOM40 homolo	TOMM40	3.41	2.29	1.44	0	0.14	0.65	TRUE	TRUE	FALSE	2
Q96GQ7	DDX27 Probable ATP-dependent RNA helicase DDX27	DDX27	0	2.29	2	0	0.24	0.01	FALSE	TRUE	TRUE	2
O15372	EIF3H Eukaryotic translation initiation factor 3 subunit	EIF3H	2.2	2.29	1.93	0.37	0.67	0.15	TRUE	TRUE	FALSE	2
P33176	KIF5B Kinesin-1 heavy chain	KIF5B	2.33	2.29	1.9	2.1	0.45	0.43	TRUE	TRUE	FALSE	2
O95361	TRIM16 Tripartite motif-containing protein 16	TRIM16	2.16	2.29	1.71	0.38	0.22	1.22	TRUE	TRUE	FALSE	2
P07195	LDHB L-lactate dehydrogenase B chain	LDHB	2.04	2.29	1.69	0.74	1.03	0.3	TRUE	TRUE	FALSE	2
Q9H488	POFUT1 GDP-fucose protein O-fucosyltransferase 1	POFUT1	1.94	2.28	2.1	0.86	0.37	0.28	FALSE	TRUE	TRUE	2
P21266	GSTM3 Glutathione S-transferase Mu 3	GSTM3	2.28	2.28	1.95	0.52	1.01	0.16	TRUE	TRUE	FALSE	2
Q13907	IDI1 Isopentenyl-diphosphate Delta-isomerase 1	IDI1	2.35	2.28	1.92	0	0.22	0.54	TRUE	TRUE	FALSE	2
P11413	G6PD Glucose-6-phosphate 1-dehydrogenase	G6PD	2.19	2.28	1.92	0.36	0.65	0.34	TRUE	TRUE	FALSE	2
P20839	IMPDH1 Inosine-5-monophosphate dehydrogenase 1	IMPDH1	2.27	2.28	1.84	0.21	0.69	0.39	TRUE	TRUE	FALSE	2
Q9P2J5	LARS Leucine--tRNA ligase, cytoplasmic	LARS	2.19	2.28	1.78	0.5	0.48	0.48	TRUE	TRUE	FALSE	2
O75369	FLNB Filamin-B	FLNB	2.09	2.28	1.75	1.79	1.55	1.66	TRUE	TRUE	FALSE	2
O00170	AIP AH receptor-interacting protein	AIP	2.01	2.28	1.63	0	0.48	0	TRUE	TRUE	FALSE	2
P49916	LIG3 DNA ligase 3	LIG3	0	2.27	2.83	0	0	0	FALSE	TRUE	TRUE	2
P21399	ACO1 Cytoplasmic aconitate hydratase	ACO1	3.76	2.27	1.98	0	0.59	0.33	TRUE	TRUE	FALSE	2
P43304	GPD2 Glycerol-3-phosphate dehydrogenase, mitochondrial	GPD2	5.16	2.27	1.69	5.59	0.48	0.2	TRUE	TRUE	FALSE	2
O95340	PAPSS2 Bifunctional 3-phosphoadenosine 5-phosphosulfate	PAPSS2	0	2.27	2.43	0	0.29	0.73	FALSE	TRUE	TRUE	2
Q9BXP5	SRRT Serrate RNA effector molecule homolog	SRRT	2.2	2.27	1.97	3.68	0.63	0.59	TRUE	TRUE	FALSE	2
O60610	DIAPH1 Protein diaphanous homolog 1	DIAPH1	2.18	2.27	1.9	1.07	1.33	0.32	TRUE	TRUE	FALSE	2
Q9Y262	EIF3L Eukaryotic translation initiation factor 3 subunit	EIF3L	2.11	2.27	1.62	4.56	2.57	0.36	TRUE	TRUE	FALSE	2
Q9NVJ2	ARL8B ADP-ribosylation factor-like protein 8B	ARL8B	2.02	2.27	1.48	0.33	0.01	0.2	TRUE	TRUE	FALSE	2
P14678	SNRPB Small nuclear ribonucleoprotein-associated protein	SNRPB	3.04	2.26	1.82	0.89	0.62	0.16	TRUE	TRUE	FALSE	2
P63162	SNRPN Small nuclear ribonucleoprotein-associated protein	SNRPN	3.04	2.26	1.82	0.89	0.62	0.16	TRUE	TRUE	FALSE	2
Q13617	CUL2 Cullin-2	CUL2	2.5	2.26	1.43	0.56	1.05	0.17	TRUE	TRUE	FALSE	2
P17174	GOT1 Aspartate aminotransferase, cytoplasmic	GOT1	2.25	2.26	1.98	0.69	5.25	0.52	TRUE	TRUE	FALSE	2
Q15008	PSMD6 26S proteasome non-ATPase regulatory subunit 6	PSMD6	2.04	2.26	1.79	1.3	4.23	0.27	TRUE	TRUE	FALSE	2
P47712	PLA2G4A Cytosolic phospholipase A2	PLA2G4A	2.02	2.26	1.79	0.52	0.83	0.28	TRUE	TRUE	FALSE	2
O00203	AP3B1 AP-3 complex subunit beta-1	AP3B1	2.26	2.26	1.76	2.38	3.11	0.22	TRUE	TRUE	FALSE	2
P62241	RPS8 40S ribosomal protein S8	RPS8	2.01	2.26	1.67	0.37	0.44	0.48	TRUE	TRUE	FALSE	2
O94906	PRPF6 Pre-mRNA-processing factor 6	PRPF6	2.17	2.26	1.64	0.75	0.46	0.44	TRUE	TRUE	FALSE	2
O60832	DKC1 H/ACA ribonucleoprotein complex subunit 4	DKC1	2.14	2.26	1.54	0.48	0.16	0.13	TRUE	TRUE	FALSE	2
A8MW45	KRT17P1 Protein KRT17P1	KRT17P1	2.49	2.26	0.88	0.39	2.2	0.39	TRUE	TRUE	FALSE	2
Q9NPF4	OSGEP Probable tRNA threonylcarbamoyladenosine biosynthe	OSGEP	15	2.25	1.78	0	0	0.55	TRUE	TRUE	FALSE	2
Q13547	HDAC1 Histone deacetylase 1	HDAC1	2.59	2.25	1.73	5.13	0.35	0.36	TRUE	TRUE	FALSE	2
Q15185	PTGES3 Prostaglandin E synthase 3	PTGES3	0	2.25	2.19	0	1.7	0.27	FALSE	TRUE	TRUE	2
Q08J23	NSUN2 tRNA (cytosine(34)-C(5))-methyltransferase	NSUN2	2.15	2.25	1.97	0.53	0.47	0.34	TRUE	TRUE	FALSE	2
P26368	U2AF2 Splicing factor U2AF 65 kDa subunit	U2AF2	2.35	2.25	1.82	0.27	0.69	0.3	TRUE	TRUE	FALSE	2
Q13618	CUL3 Cullin-3	CUL3	2.03	2.25	1.76	0.1	0.45	0.65	TRUE	TRUE	FALSE	2
P35580	MYH10 Myosin-10	MYH10	2.28	2.25	1.75	2.48	0.45	2.31	TRUE	TRUE	FALSE	2
Q9NYU2	UGGT1 UDP-glucose:glycoprotein glucosyltransferase 1	UGGT1	2.07	2.25	1.63	0.73	0.75	0.44	TRUE	TRUE	FALSE	2
Q7L014	DDX46 Probable ATP-dependent RNA helicase DDX46	DDX46	2.58	2.24	1.65	0.56	1.44	0.6	TRUE	TRUE	FALSE	2
O75116	ROCK2 Rho-associated protein kinase 2	ROCK2	2.46	2.24	1.96	3.99	0.27	0.4	TRUE	TRUE	FALSE	2
O43175	PHGDH D-3-phosphoglycerate dehydrogenase	PHGDH	2.08	2.24	1.88	0.61	0.31	0.56	TRUE	TRUE	FALSE	2
P62277	RPS13 40S ribosomal protein S13	RPS13	2.33	2.24	1.27	0.1	0.37	0.27	TRUE	TRUE	FALSE	2
Q13283	G3BP1 Ras GTPase-activating protein-binding protein 1	G3BP1	2.81	2.23	1.82	4.77	0.39	0.55	TRUE	TRUE	FALSE	2
Q13492	PICALM Phosphatidylinositol-binding clathrin assembly pro	PICALM	5.08	2.23	1.8	4.51	0.51	0.18	TRUE	TRUE	FALSE	2
O75475	PSIP1 PC4 and SFRS1-interacting protein	PSIP1	2.17	2.23	1.93	1.15	0.43	0.43	TRUE	TRUE	FALSE	2
Q13813	SPTAN1 Spectrin alpha chain, non-erythrocytic 1	SPTAN1	2.07	2.23	1.8	1.75	1.44	0.5	TRUE	TRUE	FALSE	2
Q5BKZ1	ZNF326 DBIRD complex subunit ZNF326	ZNF326	2.29	2.23	1.72	1.01	0	0.63	TRUE	TRUE	FALSE	2
P35749	MYH11 Myosin-11	MYH11	2.19	2.23	1.66	0.65	0.76	0.69	TRUE	TRUE	FALSE	2
Q14318	FKBP8 Peptidyl-prolyl cis-trans isomerase FKBP8	FKBP8	2.68	2.22	1.84	0.52	5.61	0	TRUE	TRUE	FALSE	2
Q92769	HDAC2 Histone deacetylase 2	HDAC2	2.34	2.22	1.94	0.42	0.38	0.44	TRUE	TRUE	FALSE	2
P05091	ALDH2 Aldehyde dehydrogenase, mitochondrial	ALDH2	2.21	2.22	1.84	0.32	0.96	0.21	TRUE	TRUE	FALSE	2
P12277	CKB Creatine kinase B-type	CKB	2.14	2.22	1.82	0.44	3.88	0.31	TRUE	TRUE	FALSE	2
Q7KZF4	SND1 Staphylococcal nuclease domain-containing protein	SND1	2.17	2.22	1.62	0.43	0.39	0.22	TRUE	TRUE	FALSE	2
O43172	PRPF4 U4/U6 small nuclear ribonucleoprotein Prp4	PRPF4	2.19	2.22	1.45	0.74	0.61	0	TRUE	TRUE	FALSE	2
P61978	HNRNPK Heterogeneous nuclear ribonucleoprotein K	HNRNPK	2.95	2.21	1.82	1.21	0.72	0.67	TRUE	TRUE	FALSE	2
Q14690	PDCD11 Protein RRP5 homolog	PDCD11	3.24	2.21	1.48	0	0.59	0.91	TRUE	TRUE	FALSE	2
P61923	COPZ1 Coatomer subunit zeta-1	COPZ1	3.26	2.21	1.24	0	0	0	TRUE	TRUE	FALSE	2
P11766	ADH5 Alcohol dehydrogenase class-3	ADH5	2.25	2.21	1.9	0.35	0.59	0.87	TRUE	TRUE	FALSE	2
Q05682	CALD1 Caldesmon	CALD1	2.21	2.21	1.75	3.91	1.35	3.86	TRUE	TRUE	FALSE	2
P04075	ALDOA Fructose-bisphosphate aldolase A	ALDOA	2.17	2.21	1.73	0.43	0.62	0.45	TRUE	TRUE	FALSE	2
Q96SI9	STRBP Spermatid perinuclear RNA-binding protein	STRBP	2.2	2.2	1.8	0.23	0.12	0.68	TRUE	TRUE	FALSE	2
Q16576	RBBP7 Histone-binding protein RBBP7	RBBP7	2.1	2.2	1.79	0.93	0.31	4.71	TRUE	TRUE	FALSE	2
Q14258	TRIM25 E3 ubiquitin/ISG15 ligase TRIM25	TRIM25	2.06	2.19	1.9	0.31	0.75	0.39	TRUE	TRUE	FALSE	2
P52209	PGD 6-phosphogluconate dehydrogenase, decarboxylating	PGD	2.12	2.19	1.71	0.33	0.44	0.35	TRUE	TRUE	FALSE	2
Q13619	CUL4A Cullin-4A	CUL4A	2.04	2.19	1.59	3.65	0.37	0.35	TRUE	TRUE	FALSE	2
Q13148	TARDBP TAR DNA-binding protein 43	TARDBP	2.17	2.19	1.27	0.25	0.81	0.22	TRUE	TRUE	FALSE	2
O00425	IGF2BP3 Insulin-like growth factor 2 mRNA-binding protein	IGF2BP3	2.15	2.18	1.73	0.35	5.9	0.36	TRUE	TRUE	FALSE	2
Q09028	RBBP4 Histone-binding protein RBBP4	RBBP4	2	2.18	1.66	0.5	0.5	0.25	TRUE	TRUE	FALSE	2
O95801	TTC4 Tetratricopeptide repeat protein 4	TTC4	0	2.17	15	0	0	0	FALSE	TRUE	TRUE	2
P00367	GLUD1 Glutamate dehydrogenase 1, mitochondrial	GLUD1	2.08	2.17	1.79	3.51	0.57	0.37	TRUE	TRUE	FALSE	2
Q9P0K7	RAI14 Ankycorbin	RAI14	2.37	2.17	1.75	6.45	5.39	0.58	TRUE	TRUE	FALSE	2
Q8TED0	UTP15 U3 small nucleolar RNA-associated protein 15 homol	UTP15	2.34	2.17	1.65	0	0	0	TRUE	TRUE	FALSE	2
P27635	RPL10 60S ribosomal protein L10	RPL10	2.17	2.17	1.64	0.28	0.61	0.34	TRUE	TRUE	FALSE	2
Q9BW27	NUP85 Nuclear pore complex protein Nup85	NUP85	2.01	2.16	1.08	0	1.55	0.32	TRUE	TRUE	FALSE	2
Q9P258	RCC2 Protein RCC2	RCC2	2.58	2.15	1.72	5.68	0.32	0.28	TRUE	TRUE	FALSE	2
O75717	WDHD1 WD repeat and HMG-box DNA-binding protein 1	WDHD1	0	2.15	2.45	0	0	0	FALSE	TRUE	TRUE	2
A6NDG6	PGP Phosphoglycolate phosphatase	PGP	2.08	2.15	1.99	0.49	0.28	1.43	TRUE	TRUE	FALSE	2
O15144	ARPC2 Actin-related protein 2/3 complex subunit 2	ARPC2	2.1	2.15	1.73	0.73	0.29	0.31	TRUE	TRUE	FALSE	2
Q14008	CKAP5 Cytoskeleton-associated protein 5	CKAP5	2.31	2.15	1.55	3.35	0.66	0.34	TRUE	TRUE	FALSE	2
Q13136	PPFIA1 Liprin-alpha-1	PPFIA1	2.01	2.15	1.38	0	0	0	TRUE	TRUE	FALSE	2
Q92747	ARPC1A Actin-related protein 2/3 complex subunit 1A	ARPC1A	2.5	2.14	1.7	0.49	6.33	0.55	TRUE	TRUE	FALSE	2
Q10472	GALNT1 Polypeptide N-acetylgalactosaminyltransferase 1	GALNT1	15	2.14	1.46	0	0.49	7.84	TRUE	TRUE	FALSE	2
Q92841	DDX17 Probable ATP-dependent RNA helicase DDX17	DDX17	2.21	2.14	1.85	0.51	0.45	0.25	TRUE	TRUE	FALSE	2
P40429	RPL13A 60S ribosomal protein L13a	RPL13A	2.08	2.14	1.66	0.3	0.44	0.3	TRUE	TRUE	FALSE	2
Q9UIQ6	LNPEP Leucyl-cystinyl aminopeptidase	LNPEP	0	2.13	3.87	0	0	0	FALSE	TRUE	TRUE	2
Q96PK6	RBM14 RNA-binding protein 14	RBM14	1.95	2.13	2.52	1.61	0.13	0.33	FALSE	TRUE	TRUE	2
Q13435	SF3B2 Splicing factor 3B subunit 2	SF3B2	2.54	2.13	1.83	1.61	0.59	0.46	TRUE	TRUE	FALSE	2
Q2TAY7	SMU1 WD40 repeat-containing protein SMU1	SMU1	2.25	2.13	1.87	0.13	1.54	4.44	TRUE	TRUE	FALSE	2
Q9Y5B9	SUPT16H FACT complex subunit SPT16	SUPT16H	2.3	2.13	1.79	0.79	0.52	0.58	TRUE	TRUE	FALSE	2
Q13642	FHL1 Four and a half LIM domains protein 1	FHL1	2.04	2.13	1.78	0.2	0.18	0.69	TRUE	TRUE	FALSE	2
Q71U36	TUBA1A Tubulin alpha-1A chain	TUBA1A	2.13	2.13	1.73	0.61	2.41	0.46	TRUE	TRUE	FALSE	2
Q86SF2	GALNT7 N-acetylgalactosaminyltransferase 7	GALNT7	2.28	2.13	1.61	0	1.33	0.2	TRUE	TRUE	FALSE	2
P36873	PPP1CC Serine/threonine-protein phosphatase PP1-gamma cat	PPP1CC	2.5	2.12	0	0.77	1.01	0	TRUE	TRUE	FALSE	2
Q9Y2W1	THRAP3 Thyroid hormone receptor-associated protein 3	THRAP3	2.12	2.12	1.77	0.36	0.8	0.38	TRUE	TRUE	FALSE	2
Q9H4B7	TUBB1 Tubulin beta-1 chain	TUBB1	2.5	2.11	1.8	0.27	0.29	0.11	TRUE	TRUE	FALSE	2
Q9BYX2	TBC1D2 TBC1 domain family member 2A	TBC1D2	0	2.11	2.14	0	0	0.17	FALSE	TRUE	TRUE	2
Q14152	EIF3A Eukaryotic translation initiation factor 3 subunit	EIF3A	2.22	2.11	1.76	0.71	0.91	3.33	TRUE	TRUE	FALSE	2
O43809	NUDT21 Cleavage and polyadenylation specificity factor su	NUDT21	2.09	2.11	1.75	0.3	0.3	0.14	TRUE	TRUE	FALSE	2
P68366	TUBA4A Tubulin alpha-4A chain	TUBA4A	2.14	2.11	1.73	0.52	2.41	0.45	TRUE	TRUE	FALSE	2
P13798	APEH Acylamino-acid-releasing enzyme	APEH	2.25	2.11	1.61	0.7	0.56	0.18	TRUE	TRUE	FALSE	2
P53597	SUCLG1 Succinyl-CoA ligase	SUCLG1	2.04	2.11	1.6	2.38	0.59	0.14	TRUE	TRUE	FALSE	2
P31350	RRM2 Ribonucleoside-diphosphate reductase subunit M2	RRM2	2.18	2.11	1.04	0	0.69	0.79	TRUE	TRUE	FALSE	2
Q5SW79	CEP170 Centrosomal protein of 170 kDa	CEP170	2.23	2.1	1.92	0.41	0	3.56	TRUE	TRUE	FALSE	2
A0AVT1	UBA6 Ubiquitin-like modifier-activating enzyme 6	UBA6	2.47	2.1	1.87	4.89	0.26	0.64	TRUE	TRUE	FALSE	2
P61513	RPL37A 60S ribosomal protein L37a	RPL37A	2.15	2.1	1.65	0.24	0.73	0	TRUE	TRUE	FALSE	2
P31930	UQCRC1 Cytochrome b-c1 complex subunit 1, mitochondrial	UQCRC1	2.1	2.1	1.36	0	0.53	0.19	TRUE	TRUE	FALSE	2
P00387	CYB5R3 NADH-cytochrome b5 reductase 3	CYB5R3	2.54	2.09	1.75	0.02	0.24	0.31	TRUE	TRUE	FALSE	2
O75746	SLC25A12 Calcium-binding mitochondrial carrier protein Aral	SLC25A12	2.58	2.09	0	0.14	0.64	0	TRUE	TRUE	FALSE	2
O14950	MYL12B Myosin regulatory light chain 12B	MYL12B	1.95	2.09	2	0.19	0.11	0.58	FALSE	TRUE	TRUE	2
P15170	GSPT1 Eukaryotic peptide chain release factor GTP-bindin	GSPT1	2.36	2.09	1.94	4.31	0.5	0.29	TRUE	TRUE	FALSE	2
P17844	DDX5 Probable ATP-dependent RNA helicase DDX5	DDX5	2.21	2.09	1.88	0.42	1.82	0.23	TRUE	TRUE	FALSE	2
Q9H4A4	RNPEP Aminopeptidase B	RNPEP	2.08	2.09	1.69	0.23	0.45	0.18	TRUE	TRUE	FALSE	2
Q12906	ILF3 Interleukin enhancer-binding factor 3	ILF3	2	2.09	1.62	2.62	4.14	2.3	TRUE	TRUE	FALSE	2
O43252	PAPSS1 Bifunctional 3-phosphoadenosine 5-phosphosulfate	PAPSS1	2.5	2.08	1.88	0.73	0.53	0.56	TRUE	TRUE	FALSE	2
P13073	COX4I1 Cytochrome c oxidase subunit 4 isoform 1, mitochon	COX4I1	3.33	2.08	1.49	0.21	0.35	0	TRUE	TRUE	FALSE	2
P0C0S5	H2AFZ Histone H2A.Z	H2AFZ	2.74	2.08	1.36	0.42	1.32	0.25	TRUE	TRUE	FALSE	2
Q71UI9	H2AFV Histone H2A.V	H2AFV	2.74	2.08	1.36	0.42	1.32	0.25	TRUE	TRUE	FALSE	2
P0C0S8	HIST1H2AM Histone H2A type 1	HIST1H2AM	3.45	2.08	0	0	1.32	0	TRUE	TRUE	FALSE	2
Q16777	HIST2H2AC Histone H2A type 2-C	HIST2H2AC	3.45	2.08	0	0	1.32	0	TRUE	TRUE	FALSE	2
Q9BTM1	H2AFJ Histone H2A.J	H2AFJ	3.45	2.08	0	0	1.32	0	TRUE	TRUE	FALSE	2
P29401	TKT Transketolase	TKT	2.09	2.08	1.8	1.65	1.31	1.85	TRUE	TRUE	FALSE	2
P55265	ADAR Double-stranded RNA-specific adenosine deaminase	ADAR	2.31	2.08	1.61	5.14	0.85	0.45	TRUE	TRUE	FALSE	2
O43488	AKR7A2 Aflatoxin B1 aldehyde reductase member 2	AKR7A2	2.03	2.08	1.39	0	0.09	0.34	TRUE	TRUE	FALSE	2
O00592	PODXL Podocalyxin	PODXL	3.75	2.07	1.81	0	0.06	0.2	TRUE	TRUE	FALSE	2
Q96DI7	SNRNP40 U5 small nuclear ribonucleoprotein 40 kDa protein	SNRNP40	2.58	2.07	1.8	0.39	0.47	0.19	TRUE	TRUE	FALSE	2
P68400	CSNK2A1 Casein kinase II subunit alpha	CSNK2A1	0	2.07	2.18	0	0	0	FALSE	TRUE	TRUE	2
Q8WX93	PALLD Palladin	PALLD	2.09	2.07	1.46	1.58	0.32	0.13	TRUE	TRUE	FALSE	2
Q92734	TFG Protein TFG	TFG	0	2.06	2.29	0	0	0	FALSE	TRUE	TRUE	2
Q9Y6Y8	SEC23IP SEC23-interacting protein	SEC23IP	1.98	2.06	2.07	0.43	0.86	0.72	FALSE	TRUE	TRUE	2
Q92499	DDX1 ATP-dependent RNA helicase DDX1	DDX1	2.27	2.06	1.94	0.5	1.21	0.47	TRUE	TRUE	FALSE	2
Q13838	DDX39B Spliceosome RNA helicase DDX39B	DDX39B	2.2	2.06	1.87	0.14	0.43	0.54	TRUE	TRUE	FALSE	2
O00629	KPNA4 Importin subunit alpha-4	KPNA4	2.23	2.06	0	0.73	0	0	TRUE	TRUE	FALSE	2
Q9BUF5	TUBB6 Tubulin beta-6 chain	TUBB6	2.62	2.05	1.73	0.42	0.38	0.24	TRUE	TRUE	FALSE	2
P10620	MGST1 Microsomal glutathione S-transferase 1	MGST1	2.65	2.05	0.66	0	0.85	0.84	TRUE	TRUE	FALSE	2
Q5T6V5	C9orf64 UPF0553 protein C9orf64	C9orf64	2.32	2.05	1.81	2.93	0	0	TRUE	TRUE	FALSE	2
O43865	AHCYL1 Putative adenosylhomocysteinase 2	AHCYL1	2.21	2.05	1.75	0.32	0.83	0.18	TRUE	TRUE	FALSE	2
P62633	CNBP Cellular nucleic acid-binding protein	CNBP	2.21	2.04	1.9	0	0.23	0.62	TRUE	TRUE	FALSE	2
P31943	HNRNPH1 Heterogeneous nuclear ribonucleoprotein H	HNRNPH1	2.02	2.04	1.63	0.57	3.28	0.42	TRUE	TRUE	FALSE	2
P52597	HNRNPF Heterogeneous nuclear ribonucleoprotein F	HNRNPF	2.03	2.04	1.61	0.42	0.27	0.18	TRUE	TRUE	FALSE	2
P22626	HNRNPA2B1 Heterogeneous nuclear ribonucleoproteins A2/B1	HNRNPA2B1	2.23	2.04	1.51	0.86	0.72	0.21	TRUE	TRUE	FALSE	2
O14828	SCAMP3 Secretory carrier-associated membrane protein 3	SCAMP3	2.09	2.04	1.46	0.37	0.57	0.57	TRUE	TRUE	FALSE	2
Q9H4A3	WNK1 Serine/threonine-protein kinase WNK1	WNK1	2.47	2.04	1.44	0	0.2	1.12	TRUE	TRUE	FALSE	2
Q9UN86	G3BP2 Ras GTPase-activating protein-binding protein 2	G3BP2	2.32	2.04	1.36	0	0.02	0.17	TRUE	TRUE	FALSE	2
Q92888	ARHGEF1 Rho guanine nucleotide exchange factor 1	ARHGEF1	2.31	2.04	1.35	0	0	0	TRUE	TRUE	FALSE	2
Q92599	SEPT8 Septin-8	2017-09-08	0	2.03	2.56	0	0	4.06	FALSE	TRUE	TRUE	2
Q8IVF2	AHNAK2 Protein AHNAK2	AHNAK2	2.71	2.03	1.64	5.19	0.73	0.49	TRUE	TRUE	FALSE	2
Q68EM7	ARHGAP17 Rho GTPase-activating protein 17	ARHGAP17	2.03	2.03	1.71	0.35	0.17	5.89	TRUE	TRUE	FALSE	2
Q9H3N1	TMX1 Thioredoxin-related transmembrane protein 1	TMX1	2.64	2.02	1.56	1.02	0.17	0.04	TRUE	TRUE	FALSE	2
Q9BWE0	REPIN1 Replication initiator 1	REPIN1	15	2.02	1.46	0	0.18	0.08	TRUE	TRUE	FALSE	2
P49756	RBM25 RNA-binding protein 25	RBM25	2.08	2.02	1.86	0.06	0.83	0.31	TRUE	TRUE	FALSE	2
O00571	DDX3X ATP-dependent RNA helicase DDX3X	DDX3X	2.1	2.02	1.65	0.67	3.18	0.48	TRUE	TRUE	FALSE	2
Q03701	CEBPZ CCAAT/enhancer-binding protein zeta	CEBPZ	2.03	2.02	1.21	0.25	0	0	TRUE	TRUE	FALSE	2
Q07157	TJP1 Tight junction protein ZO-1	TJP1	1.73	2.01	2.09	0.29	1.41	0	FALSE	TRUE	TRUE	2
P36578	RPL4 60S ribosomal protein L4	RPL4	2.39	2	1.69	0.38	0.36	0.2	TRUE	TRUE	FALSE	2
Q8N1G4	LRRC47 Leucine-rich repeat-containing protein 47	LRRC47	2.71	1.97	2.08	0.4	0.58	0.71	TRUE	FALSE	TRUE	2
Q969S3	ZNF622 Zinc finger protein 622	ZNF622	2.13	1.95	2.14	0	7.54	0.88	TRUE	FALSE	TRUE	2
P36543	ATP6V1E1 V-type proton ATPase subunit E 1	ATP6V1E1	3.34	1.94	3.94	0	0	0	TRUE	FALSE	TRUE	2
Q9Y6E0	STK24 Serine/threonine-protein kinase 24	STK24	2.89	1.91	2.34	1.59	0.8	0.49	TRUE	FALSE	TRUE	2
P04181	OAT Ornithine aminotransferase, mitochondrial	OAT	4.14	1.9	2.38	7.62	0.06	0	TRUE	FALSE	TRUE	2
P15121	AKR1B1 Aldose reductase	AKR1B1	2.12	1.88	2.17	0.41	0.16	0.44	TRUE	FALSE	TRUE	2
Q8WWI1	LMO7 LIM domain only protein 7	LMO7	3	1.85	2.01	0.67	0.61	0.49	TRUE	FALSE	TRUE	2
H3BN98	Uncharacterized protein	Uncharacterized	2.33	1.78	2.01	0.45	0.06	0.54	TRUE	FALSE	TRUE	2
Q13418	ILK Integrin-linked protein kinase	ILK	2.13	1.75	2.12	0.68	0.69	0	TRUE	FALSE	TRUE	2
P30740	SERPINB1 Leukocyte elastase inhibitor	SERPINB1	6.73	1.7	2.12	0	0.93	0	TRUE	FALSE	TRUE	2
P01023	A2M Alpha-2-macroglobulin	A2M	2.08	1.63	2.28	0.51	0.19	0.63	TRUE	FALSE	TRUE	2
P50995	ANXA11 Annexin A11	ANXA11	2.54	1.54	3.14	0.45	1.09	5.63	TRUE	FALSE	TRUE	2
P13987	CD59 CD59 glycoprotein	CD59	2.67	1.53	2.04	0.45	1.05	0.4	TRUE	FALSE	TRUE	2
Q5JPE7	NOMO2 Nodal modulator 2	NOMO2	2.94	1.52	2.08	0	0.2	0.08	TRUE	FALSE	TRUE	2
Q99961	SH3GL1 Endophilin-A2	SH3GL1	2.32	1.45	2.62	2.46	0.5	6.22	TRUE	FALSE	TRUE	2
P35520	CBS Cystathionine beta-synthase	CBS	2.62	1.28	2.28	0.35	1.13	0.74	TRUE	FALSE	TRUE	2
O60684	KPNA6 Importin subunit alpha-7	KPNA6	2.19	1.21	2.18	0	0.86	2.42	TRUE	FALSE	TRUE	2
Q9BZF9	UACA Uveal autoantigen with coiled-coil domains and ank	UACA	2.12	1.17	2.4	0	1.17	0.2	TRUE	FALSE	TRUE	2
Q8WXI9	GATAD2B Transcriptional repressor p66-beta	GATAD2B	2.33	0.29	2.14	0.21	0	0	TRUE	FALSE	TRUE	2
P34949	MPI Mannose-6-phosphate isomerase	MPI	7.74	0	15	10.27	0	0	TRUE	FALSE	TRUE	2
O75940	SMNDC1 Survival of motor neuron-related-splicing factor 3	SMNDC1	3.95	0	8.77	0	0	8.81	TRUE	FALSE	TRUE	2
Q9H2U1	DHX36 Probable ATP-dependent RNA helicase DHX36	DHX36	3.29	0	8.35	2.66	0	9.41	TRUE	FALSE	TRUE	2
Q9BRP8	WIBG Partner of Y14 and mago	WIBG	15	0	7.61	0	0	10.46	TRUE	FALSE	TRUE	2
Q00577	PURA Transcriptional activator protein Pur-alpha	PURA	14.84	0	5.47	0	0	0	TRUE	FALSE	TRUE	2
Q13740	ALCAM CD166 antigen	ALCAM	4.65	0	3.78	0	0	1.3	TRUE	FALSE	TRUE	2
Q96EY8	MMAB Cob(I)yrinic acid a,c-diamide adenosyltransferase,	MMAB	11.96	0	3.71	4.31	0	0	TRUE	FALSE	TRUE	2
Q9NSK0	KLC4 Kinesin light chain 4	KLC4	5.25	0	3.59	0	0	1.12	TRUE	FALSE	TRUE	2
O75477	ERLIN1 Erlin-1	ERLIN1	5.35	0	3.47	4.43	0	0.36	TRUE	FALSE	TRUE	2
P67936	TPM4 Tropomyosin alpha-4 chain	TPM4	15	0	3.46	0	0	5.55	TRUE	FALSE	TRUE	2
Q567U6	CCDC93 Coiled-coil domain-containing protein 93	CCDC93	3.65	0	3.33	0	0	0.93	TRUE	FALSE	TRUE	2
P31483	TIA1 Nucleolysin TIA-1 isoform p40	TIA1	3.09	0	3.21	0	0	0.11	TRUE	FALSE	TRUE	2
P23588	EIF4B Eukaryotic translation initiation factor 4B	EIF4B	3.77	0	3.15	1.8	0	1.91	TRUE	FALSE	TRUE	2
Q9BZD4	NUF2 Kinetochore protein Nuf2	NUF2	4.16	0	3.1	0	0	0	TRUE	FALSE	TRUE	2
P49720	PSMB3 Proteasome subunit beta type-3	PSMB3	15	0	2.91	0	0	0	TRUE	FALSE	TRUE	2
Q9BXW7	CECR5 Cat eye syndrome critical region protein 5	CECR5	2.84	0	2.81	0	0	1.94	TRUE	FALSE	TRUE	2
Q14978	NOLC1 Nucleolar and coiled-body phosphoprotein 1	NOLC1	5.81	0	2.69	3.81	0	0	TRUE	FALSE	TRUE	2
Q9NX58	LYAR Cell growth-regulating nucleolar protein	LYAR	4.12	0	2.67	0	0	0.9	TRUE	FALSE	TRUE	2
Q5JTV8	TOR1AIP1 Torsin-1A-interacting protein 1	TOR1AIP1	5.49	0	2.57	0	0	0	TRUE	FALSE	TRUE	2
Q5T8P6	RBM26 RNA-binding protein 26	RBM26	7.86	0	2.54	6.75	0	1.23	TRUE	FALSE	TRUE	2
P28482	MAPK1 Mitogen-activated protein kinase 1	MAPK1	2.96	0	2.46	0	0	0.32	TRUE	FALSE	TRUE	2
Q96A72	MAGOHB Protein mago nashi homolog 2	MAGOHB	2.58	0	2.37	7.23	0	6.44	TRUE	FALSE	TRUE	2
Q14919	DRAP1 Dr1-associated corepressor	DRAP1	3.2	0	2.34	0	0	0.1	TRUE	FALSE	TRUE	2
P52788	SMS Spermine synthase	SMS	9.27	0	2.33	8.11	0	0.21	TRUE	FALSE	TRUE	2
Q9H6T3	RPAP3 RNA polymerase II-associated protein 3	RPAP3	3.85	0	2.28	0	0	0	TRUE	FALSE	TRUE	2
P32322	PYCR1 Pyrroline-5-carboxylate reductase 1, mitochondrial	PYCR1	2.85	0	2.22	0.23	0	0	TRUE	FALSE	TRUE	2
Q9UKX7	NUP50 Nuclear pore complex protein Nup50	NUP50	2.93	0	2.21	0	0	0.84	TRUE	FALSE	TRUE	2
P43686	PSMC4 26S protease regulatory subunit 6B	PSMC4	10.67	0	2.2	6.12	0	0.27	TRUE	FALSE	TRUE	2
Q9GZR2	REXO4 RNA exonuclease 4	REXO4	15	0	2.18	0	0	0	TRUE	FALSE	TRUE	2
Q03252	LMNB2 Lamin-B2	LMNB2	2.8	0	2.18	1.72	0	0.62	TRUE	FALSE	TRUE	2
Q15650	TRIP4 Activating signal cointegrator 1	TRIP4	15	0	2.16	0	0	0	TRUE	FALSE	TRUE	2
O94826	TOMM70A Mitochondrial import receptor subunit TOM70	TOMM70A	3.12	0	2.14	0.2	0	0.18	TRUE	FALSE	TRUE	2
Q9NQR4	NIT2 Omega-amidase NIT2	NIT2	3.74	0	2.13	0	0	1.47	TRUE	FALSE	TRUE	2
Q92804	TAF15 TATA-binding protein-associated factor 2N	TAF15	3.7	0	2.13	0	0	1.47	TRUE	FALSE	TRUE	2
Q9Y696	CLIC4 Chloride intracellular channel protein 4	CLIC4	3.18	0	2.07	6.87	0	0.09	TRUE	FALSE	TRUE	2
P02794	FTH1 Ferritin heavy chain	FTH1	2.7	0	2.07	0.74	0	0.6	TRUE	FALSE	TRUE	2
Q9UBQ0	VPS29 Vacuolar protein sorting-associated protein 29	VPS29	2.4	0	2.35	0.28	0	0.32	TRUE	FALSE	TRUE	2
Q7Z417	NUFIP2 Nuclear fragile X mental retardation-interacting p	NUFIP2	2.41	0	2.34	0	0	0	TRUE	FALSE	TRUE	2
Q14651	PLS1 Plastin-1	PLS1	2.38	0	2.18	0.07	0	0.09	TRUE	FALSE	TRUE	2
O95372	LYPLA2 Acyl-protein thioesterase 2	LYPLA2	2.1	0	2.07	0	0	0	TRUE	FALSE	TRUE	2
O15042	U2SURP U2 snRNP-associated SURP motif-containing protein	U2SURP	0	15	1.75	0	0	7.72	FALSE	TRUE	FALSE	1
Q9BXW9	FANCD2 Fanconi anemia group D2 protein	FANCD2	0	15	1.47	0	0	0.31	FALSE	TRUE	FALSE	1
Q8N3C0	ASCC3 Activating signal cointegrator 1 complex subunit 3	ASCC3	0	15	1.23	0	0	0.13	FALSE	TRUE	FALSE	1
Q32P44	EML3 Echinoderm microtubule-associated protein-like 3	EML3	0	15	0.94	0	0	0	FALSE	TRUE	FALSE	1
P78356	PIP4K2B Phosphatidylinositol 5-phosphate 4-kinase type-2 b	PIP4K2B	1.41	15	0	0	0	0	FALSE	TRUE	FALSE	1
F5H5P2	Uncharacterized protein	Uncharacterized	0	15	0	0	0	0	FALSE	TRUE	FALSE	1
O14908	GIPC1 PDZ domain-containing protein GIPC1	GIPC1	0	15	0	0	0	0	FALSE	TRUE	FALSE	1
O94953	KDM4B Lysine-specific demethylase 4B	KDM4B	0	15	0	0	0	0	FALSE	TRUE	FALSE	1
P07942	LAMB1 Laminin subunit beta-1	LAMB1	0	15	0	0	0	0	FALSE	TRUE	FALSE	1
P12694	BCKDHA 2-oxoisovalerate dehydrogenase subunit alpha, mito	BCKDHA	0	15	0	0	0	0	FALSE	TRUE	FALSE	1
P18858	LIG1 DNA ligase 1	LIG1	0	15	0	0	0	0	FALSE	TRUE	FALSE	1
P49848	TAF6 Transcription initiation factor TFIID subunit 6	TAF6	0	15	0	0	0	0	FALSE	TRUE	FALSE	1
Q16134	ETFDH Electron transfer flavoprotein-ubiquinone oxidored	ETFDH	0	15	0	0	0	0	FALSE	TRUE	FALSE	1
Q5D862	FLG2 Filaggrin-2	FLG2	0	15	0	0	0	0	FALSE	TRUE	FALSE	1
Q7Z5K2	WAPAL Wings apart-like protein homolog	WAPAL	0	15	0	0	0	0	FALSE	TRUE	FALSE	1
Q93034	CUL5 Cullin-5	CUL5	0	15	0	0	0	0	FALSE	TRUE	FALSE	1
Q9H788	SH2D4A SH2 domain-containing protein 4A	SH2D4A	0	15	0	0	0	0	FALSE	TRUE	FALSE	1
Reverse_Q6ZMC9	SIGLEC15 Sialic acid-binding Ig-like lectin 15	SIGLEC15	0	15	0	0	0	0	FALSE	TRUE	FALSE	1
Reverse_Q7Z3U7	MON2 Protein MON2 homolog	MON2	0	15	0	0	0	0	FALSE	TRUE	FALSE	1
Reverse_Q8IZC6	COL27A1 Collagen alpha-1(XXVII) chain	COL27A1	0	15	0	0	0	0	FALSE	TRUE	FALSE	1
Reverse_Q9C0C7	AMBRA1 Activating molecule in BECN1-regulated autophagy p	AMBRA1	0	15	0	0	0	0	FALSE	TRUE	FALSE	1
P07858	CTSB Cathepsin B	CTSB	0	14.7	0	0	0.43	0	FALSE	TRUE	FALSE	1
Q7L592	C2orf56 Protein midA homolog, mitochondrial	C2orf56	0	14.58	0	0	0	0	FALSE	TRUE	FALSE	1
Q13033	STRN3 Striatin-3	STRN3	0	13.72	1.98	0	0	0.43	FALSE	TRUE	FALSE	1
P37840	SNCA Alpha-synuclein	SNCA	0	12.92	0	0	0	0	FALSE	TRUE	FALSE	1
Q86XJ1	GAS2L3 GAS2-like protein 3	GAS2L3	0	11.8	0	0	4.53	0	FALSE	TRUE	FALSE	1
Q96K76	USP47 Ubiquitin carboxyl-terminal hydrolase 47	USP47	0	11.61	0	0	4.79	0	FALSE	TRUE	FALSE	1
Q9H9Q2	COPS7B COP9 signalosome complex subunit 7b	COPS7B	0	9.59	0	0	0	0	FALSE	TRUE	FALSE	1
P51948	MNAT1 CDK-activating kinase assembly factor MAT1	MNAT1	0	9.54	0	0	7.72	0	FALSE	TRUE	FALSE	1
Q9Y3Y2	CHTOP Chromatin target of PRMT1 protein	CHTOP	0	9.43	0	0	7.88	0	FALSE	TRUE	FALSE	1
Q9Y4W2	LAS1L Ribosomal biogenesis protein LAS1L	LAS1L	1.1	8.95	1.12	0.23	0	0.4	FALSE	TRUE	FALSE	1
Q9BUI4	POLR3C DNA-directed RNA polymerase III subunit RPC3	POLR3C	0	8.91	0	0	8.61	0	FALSE	TRUE	FALSE	1
O75663	TIPRL TIP41-like protein	TIPRL	0	8.89	0	0	8.64	0	FALSE	TRUE	FALSE	1
P50135	HNMT Histamine N-methyltransferase	HNMT	0	8.81	0	0	8.75	0	FALSE	TRUE	FALSE	1
Q9BYG3	MKI67IP MKI67 FHA domain-interacting nucleolar phosphoprot	MKI67IP	0	8.71	1.84	0	0	0.07	FALSE	TRUE	FALSE	1
Q01844	EWSR1 RNA-binding protein EWS	EWSR1	1.98	8.38	1.75	4.18	9.36	0.23	FALSE	TRUE	FALSE	1
Q9Y6K9	IKBKG NF-kappa-B essential modulator	IKBKG	0	8.25	0	0	4.38	0	FALSE	TRUE	FALSE	1
O75306	NDUFS2 NADH dehydrogenase	NDUFS2	0	8.22	0	0	9.58	0	FALSE	TRUE	FALSE	1
P01130	LDLR Low-density lipoprotein receptor	LDLR	0	8.19	0	0	9.63	0	FALSE	TRUE	FALSE	1
P48200	IREB2 Iron-responsive element-binding protein 2	IREB2	0	8.19	0	0	9.64	0	FALSE	TRUE	FALSE	1
Q6P587	FAHD1 Acylpyruvase FAHD1, mitochondrial	FAHD1	0	8.14	0	0	9.7	0	FALSE	TRUE	FALSE	1
Q9H2H9	SLC38A1 Sodium-coupled neutral amino acid transporter 1	SLC38A1	0	8.03	0	0	9.86	0	FALSE	TRUE	FALSE	1
H3BQ75	ST20-MTHFS Protein ST20-MTHFS	ST20-MTHFS	0	7.89	1.88	0	10.05	0	FALSE	TRUE	FALSE	1
P49914	MTHFS 5-formyltetrahydrofolate cyclo-ligase	MTHFS	0	7.89	1.88	0	10.05	0	FALSE	TRUE	FALSE	1
O60333	KIF1B Kinesin-like protein KIF1B	KIF1B	1.61	7.66	1.52	0	8.35	0	FALSE	TRUE	FALSE	1
Q15020	SART3 Squamous cell carcinoma antigen recognized by T-ce	SART3	0	7.46	1.91	0	0	0.45	FALSE	TRUE	FALSE	1
P61086	UBE2K Ubiquitin-conjugating enzyme E2 K	UBE2K	0	7.29	0	0	3.99	0	FALSE	TRUE	FALSE	1
P49790	NUP153 Nuclear pore complex protein Nup153	NUP153	0	7.27	1.4	0	5.36	0.52	FALSE	TRUE	FALSE	1
Q9Y3C1	NOP16 Nucleolar protein 16	NOP16	0	6.95	0	0	1.68	0	FALSE	TRUE	FALSE	1
Q96GC5	MRPL48 39S ribosomal protein L48, mitochondrial	MRPL48	0	6.43	0	0	5.32	0	FALSE	TRUE	FALSE	1
Q9NQX3	GPHN Gephyrin	GPHN	0	6.17	1.55	0	0	0.08	FALSE	TRUE	FALSE	1
Q8N4N8	KIF2B Kinesin-like protein KIF2B	KIF2B	0	5.72	0	0	0	0	FALSE	TRUE	FALSE	1
Q99816	TSG101 Tumor susceptibility gene 101 protein	TSG101	0	5.61	0	0	3.75	0	FALSE	TRUE	FALSE	1
Q9NT62	ATG3 Ubiquitin-like-conjugating enzyme ATG3	ATG3	0	5.59	0	0	5.25	0	FALSE	TRUE	FALSE	1
Q9NSV4	DIAPH3 Protein diaphanous homolog 3	DIAPH3	0	5.54	1.4	0	0	0	FALSE	TRUE	FALSE	1
P48454	PPP3CC Serine/threonine-protein phosphatase 2B catalytic	PPP3CC	0	5.41	0	0	5.56	0	FALSE	TRUE	FALSE	1
Q5JQF8	PABPC1L2B Polyadenylate-binding protein 1-like 2	PABPC1L2B	0	5.31	0	0	3.78	0	FALSE	TRUE	FALSE	1
O75175	CNOT3 CCR4-NOT transcription complex subunit 3	CNOT3	0	5.26	1.79	0	0	0.05	FALSE	TRUE	FALSE	1
P46939	UTRN Utrophin	UTRN	0	5.17	1.73	0	0	0	FALSE	TRUE	FALSE	1
Q08378	GOLGA3 Golgin subfamily A member 3	GOLGA3	0	5.07	1.56	0	4.36	1.05	FALSE	TRUE	FALSE	1
Q99933	BAG1 BAG family molecular chaperone regulator 1	BAG1	1.54	4.86	1.04	0.38	0	0.5	FALSE	TRUE	FALSE	1
Q9BRP4	PAAF1 Proteasomal ATPase-associated factor 1	PAAF1	0	4.86	0	0	4.06	0	FALSE	TRUE	FALSE	1
Q15642	TRIP10 Cdc42-interacting protein 4	TRIP10	0	4.78	1.85	0	0	0	FALSE	TRUE	FALSE	1
Q9Y3C6	PPIL1 Peptidyl-prolyl cis-trans isomerase-like 1	PPIL1	1.82	4.75	1.58	0.6	2.92	0.56	FALSE	TRUE	FALSE	1
Reverse_P23246	SFPQ Splicing factor, proline- and glutamine-rich	SFPQ	0	4.63	0	0	0	0	FALSE	TRUE	FALSE	1
Q15435	PPP1R7 Protein phosphatase 1 regulatory subunit 7	PPP1R7	0	4.61	0	0	0	0	FALSE	TRUE	FALSE	1
Q9NVD7	PARVA Alpha-parvin	PARVA	1.8	4.55	0	0	2.21	0	FALSE	TRUE	FALSE	1
O75521	ECI2 Enoyl-CoA delta isomerase 2, mitochondrial	ECI2	0	4.44	1.96	0	0	0	FALSE	TRUE	FALSE	1
P47895	ALDH1A3 Aldehyde dehydrogenase family 1 member A3	ALDH1A3	0	4.36	0	0	0	0	FALSE	TRUE	FALSE	1
P40616	ARL1 ADP-ribosylation factor-like protein 1	ARL1	0	4.27	0	0	0	0	FALSE	TRUE	FALSE	1
Q16740	CLPP Putative ATP-dependent Clp protease proteolytic su	CLPP	0	4.21	0	0	3.81	0	FALSE	TRUE	FALSE	1
Q14789	GOLGB1 Golgin subfamily B member 1	GOLGB1	0	4.14	1.65	0	7.05	0.69	FALSE	TRUE	FALSE	1
Q9P2T1	GMPR2 GMP reductase 2	GMPR2	0	4.07	1.92	0	2.6	0	FALSE	TRUE	FALSE	1
Q9BZQ8	FAM129A Protein Niban	FAM129A	0	4.04	1.94	0	0	0	FALSE	TRUE	FALSE	1
B5ME49	MUC16 Mucin-16	MUC16	0	3.95	0	0	0	0	FALSE	TRUE	FALSE	1
Q9Y2C4	EXOG Nuclease EXOG, mitochondrial	EXOG	0	3.95	0	0	0	0	FALSE	TRUE	FALSE	1
O15382	BCAT2 Branched-chain-amino-acid aminotransferase, mitoch	BCAT2	0	3.91	0	0	0	0	FALSE	TRUE	FALSE	1
P36507	MAP2K2 Dual specificity mitogen-activated protein kinase	MAP2K2	0	3.88	1.92	0	1.99	0.28	FALSE	TRUE	FALSE	1
Q12979	ABR Active breakpoint cluster region-related protein	ABR	0	3.84	0	0	0	0	FALSE	TRUE	FALSE	1
O75122	CLASP2 CLIP-associating protein 2	CLASP2	1.06	3.83	1.58	0	3.17	0.51	FALSE	TRUE	FALSE	1
Q8WWY3	PRPF31 U4/U6 small nuclear ribonucleoprotein Prp31	PRPF31	0	3.76	1.49	0	0	0	FALSE	TRUE	FALSE	1
Q9UL40	ZNF346 Zinc finger protein 346	ZNF346	0	3.76	0	0	0	0	FALSE	TRUE	FALSE	1
Q9Y376	CAB39 Calcium-binding protein 39	CAB39	0	3.74	0	0	0.24	0	FALSE	TRUE	FALSE	1
Q7L775	EPM2AIP1 EPM2A-interacting protein 1	EPM2AIP1	0	3.73	0	0	0	0	FALSE	TRUE	FALSE	1
Q6P1K8	GTF2H2D General transcription factor IIH subunit 2-like pr	GTF2H2D	0	3.72	0	0	2.84	0	FALSE	TRUE	FALSE	1
Q16352	INA Alpha-internexin	INA	0	3.71	0	0	1.41	0	FALSE	TRUE	FALSE	1
P62308	SNRPG Small nuclear ribonucleoprotein G	SNRPG	0	3.7	0	0	0	0	FALSE	TRUE	FALSE	1
P07686	HEXB Beta-hexosaminidase subunit beta	HEXB	0	3.69	1.56	0	5.99	0	FALSE	TRUE	FALSE	1
Q9H7D0	DOCK5 Dedicator of cytokinesis protein 5	DOCK5	1.38	3.66	1.31	0.21	6.28	0.88	FALSE	TRUE	FALSE	1
P30046	DDT D-dopachrome decarboxylase	DDT	0	3.64	0	0	0	0	FALSE	TRUE	FALSE	1
Q8N7H5	PAF1 RNA polymerase II-associated factor 1 homolog	PAF1	0	3.59	0	0	0	0	FALSE	TRUE	FALSE	1
Q96HS1	PGAM5 Serine/threonine-protein phosphatase PGAM5, mitoch	PGAM5	0	3.55	0	0	0	0	FALSE	TRUE	FALSE	1
O00233	PSMD9 26S proteasome non-ATPase regulatory subunit 9	PSMD9	0	3.53	1.83	0	1.1	0	FALSE	TRUE	FALSE	1
Q8WVY7	UBLCP1 Ubiquitin-like domain-containing CTD phosphatase 1	UBLCP1	0	3.51	0	0	0	0	FALSE	TRUE	FALSE	1
P32455	GBP1 Interferon-induced guanylate-binding protein 1	GBP1	0	3.5	1.86	0	3.25	0.25	FALSE	TRUE	FALSE	1
P20339	RAB5A Ras-related protein Rab-5A	RAB5A	0	3.5	0	0	0	0	FALSE	TRUE	FALSE	1
P0CW22	RPS17L 40S ribosomal protein S17-like	RPS17L	1.84	3.46	1.53	0.47	3.82	0.15	FALSE	TRUE	FALSE	1
Q9BS40	LXN Latexin	LXN	0	3.45	0	0	0	0	FALSE	TRUE	FALSE	1
P62942	FKBP1A Peptidyl-prolyl cis-trans isomerase FKBP1A	FKBP1A	0	3.42	0	0	0	0	FALSE	TRUE	FALSE	1
P52735	VAV2 Guanine nucleotide exchange factor VAV2	VAV2	0	3.41	1.54	0	4.07	0.49	FALSE	TRUE	FALSE	1
Q92526	CCT6B T-complex protein 1 subunit zeta-2	CCT6B	0	3.41	0	0	1.16	0	FALSE	TRUE	FALSE	1
Q14376	GALE UDP-glucose 4-epimerase	GALE	0	3.4	0	0	0	0	FALSE	TRUE	FALSE	1
P35914	HMGCL Hydroxymethylglutaryl-CoA lyase, mitochondrial	HMGCL	0	3.39	0	0	0	0	FALSE	TRUE	FALSE	1
J3KR12	Uncharacterized protein	Uncharacterized	0	3.34	0	0	0	0	FALSE	TRUE	FALSE	1
Q96C36	PYCR2 Pyrroline-5-carboxylate reductase 2	PYCR2	0	3.34	0	0	0	0	FALSE	TRUE	FALSE	1
Q9P2E3	ZNFX1 NFX1-type zinc finger-containing protein 1	ZNFX1	0	3.34	0	0	0	0	FALSE	TRUE	FALSE	1
Q9Y3B7	MRPL11 39S ribosomal protein L11, mitochondrial	MRPL11	0	3.34	0	0	0	0	FALSE	TRUE	FALSE	1
P84085	ARF5 ADP-ribosylation factor 5	ARF5	1.91	3.33	1.29	0.06	1.21	0.11	FALSE	TRUE	FALSE	1
Q13153	PAK1 Serine/threonine-protein kinase PAK 1	PAK1	0	3.32	1.91	0	0	0	FALSE	TRUE	FALSE	1
P49821	NDUFV1 NADH dehydrogenase	NDUFV1	0	3.32	0	0	0	0	FALSE	TRUE	FALSE	1
Q08209	PPP3CA Serine/threonine-protein phosphatase 2B catalytic	PPP3CA	1.89	3.31	1.62	0.1	3.57	0.63	FALSE	TRUE	FALSE	1
P49406	MRPL19 39S ribosomal protein L19, mitochondrial	MRPL19	0	3.28	1.76	0	0.91	0.15	FALSE	TRUE	FALSE	1
P15924	DSP Desmoplakin	DSP	1.77	3.27	0.48	0	4.56	0.27	FALSE	TRUE	FALSE	1
P61353	RPL27 60S ribosomal protein L27	RPL27	0	3.22	1.57	0	0	0.43	FALSE	TRUE	FALSE	1
Q9Y5X3	SNX5 Sorting nexin-5	SNX5	0	3.22	0	0	2.54	0	FALSE	TRUE	FALSE	1
Q9ULC4	MCTS1 Malignant T-cell-amplified sequence 1	MCTS1	0	3.21	0	0	0	0	FALSE	TRUE	FALSE	1
Q9Y639	NPTN Neuroplastin	NPTN	0	3.21	0	0	0	0	FALSE	TRUE	FALSE	1
Q92552	MRPS27 28S ribosomal protein S27, mitochondrial	MRPS27	1.51	3.19	1.54	0	0	0.36	FALSE	TRUE	FALSE	1
Q9BZE4	GTPBP4 Nucleolar GTP-binding protein 1	GTPBP4	1.54	3.14	1.39	0.48	0.26	0.49	FALSE	TRUE	FALSE	1
P27144	AK4 Adenylate kinase isoenzyme 4, mitochondrial	AK4	0	3.13	0	0	0.56	0	FALSE	TRUE	FALSE	1
C9J1V9	Uncharacterized protein	Uncharacterized	0	3.12	1.99	0	0	0.14	FALSE	TRUE	FALSE	1
O43324	EEF1E1 Eukaryotic translation elongation factor 1 epsilon	EEF1E1	0	3.12	1.99	0	0	0.14	FALSE	TRUE	FALSE	1
P22694	PRKACB cAMP-dependent protein kinase catalytic subunit be	PRKACB	0	3.11	1.49	0	0.54	0.23	FALSE	TRUE	FALSE	1
Q63ZY3	KANK2 KN motif and ankyrin repeat domain-containing prot	KANK2	0	3.08	1.27	0	0.42	0	FALSE	TRUE	FALSE	1
Q9BVJ6	UTP14A U3 small nucleolar RNA-associated protein 14 homol	UTP14A	0	3.07	1.55	0	0	0	FALSE	TRUE	FALSE	1
Q13724	MOGS Mannosyl-oligosaccharide glucosidase	MOGS	0	3.06	0	0	0	0	FALSE	TRUE	FALSE	1
O15460	P4HA2 Prolyl 4-hydroxylase subunit alpha-2	P4HA2	1.84	3.02	1.62	0	0.04	0	FALSE	TRUE	FALSE	1
Q13685	AAMP Angio-associated migratory cell protein	AAMP	0	3.01	0	0	0	0	FALSE	TRUE	FALSE	1
O95453	PARN Poly(A)-specific ribonuclease PARN	PARN	0	2.98	0	0	1.45	0	FALSE	TRUE	FALSE	1
Q9HCC0	MCCC2 Methylcrotonoyl-CoA carboxylase beta chain, mitoch	MCCC2	1.52	2.97	1.69	0	0	0.05	FALSE	TRUE	FALSE	1
P45877	PPIC Peptidyl-prolyl cis-trans isomerase C	PPIC	0	2.96	1.5	0	0.12	0.25	FALSE	TRUE	FALSE	1
O14656	TOR1A Torsin-1A	TOR1A	0	2.96	0	0	0	0	FALSE	TRUE	FALSE	1
Q14764	MVP Major vault protein	MVP	1.53	2.95	0	0	0	0	FALSE	TRUE	FALSE	1
Q9NYK5	MRPL39 39S ribosomal protein L39, mitochondrial	MRPL39	0	2.93	0	0	0	0	FALSE	TRUE	FALSE	1
Q9H6S0	YTHDC2 Probable ATP-dependent RNA helicase YTHDC2	YTHDC2	0	2.93	0	0	7.39	0	FALSE	TRUE	FALSE	1
Q99459	CDC5L Cell division cycle 5-like protein	CDC5L	1.76	2.92	1.88	0.23	4.48	0.26	FALSE	TRUE	FALSE	1
P49643	PRIM2 DNA primase large subunit	PRIM2	0	2.92	1.86	0	0	1.38	FALSE	TRUE	FALSE	1
P98082	DAB2 Disabled homolog 2	DAB2	0	2.92	1.25	0	0	0	FALSE	TRUE	FALSE	1
Q13427	PPIG Peptidyl-prolyl cis-trans isomerase G	PPIG	0	2.91	0	0	0.29	0	FALSE	TRUE	FALSE	1
Q9UBD5	ORC3 Origin recognition complex subunit 3	ORC3	0	2.89	1.44	0	0	0.16	FALSE	TRUE	FALSE	1
Q9NUQ9	FAM49B Protein FAM49B	FAM49B	0	2.88	1.71	0	1.12	0.32	FALSE	TRUE	FALSE	1
P63279	UBE2I SUMO-conjugating enzyme UBC9	UBE2I	0	2.88	0	0	0	0	FALSE	TRUE	FALSE	1
Q9Y570	PPME1 Protein phosphatase methylesterase 1	PPME1	0	2.86	1.53	0	0.96	0.15	FALSE	TRUE	FALSE	1
Q12996	CSTF3 Cleavage stimulation factor subunit 3	CSTF3	1.83	2.85	1.77	0.1	5.69	0.01	FALSE	TRUE	FALSE	1
P30622	CLIP1 CAP-Gly domain-containing linker protein 1	CLIP1	0	2.85	1.34	0	0.87	0	FALSE	TRUE	FALSE	1
P51531	SMARCA2 Probable global transcription activator SNF2L2	SMARCA2	0	2.85	1.29	0	0	0.11	FALSE	TRUE	FALSE	1
O60645	EXOC3 Exocyst complex component 3	EXOC3	0	2.84	0	0	0	0	FALSE	TRUE	FALSE	1
Q9Y4W6	AFG3L2 AFG3-like protein 2	AFG3L2	0	2.84	0	0	0.04	0	FALSE	TRUE	FALSE	1
Q7Z3J2	C16orf62 UPF0505 protein C16orf62	C16orf62	1.54	2.83	1.45	0	5.06	0.18	FALSE	TRUE	FALSE	1
Q6PCE3	PGM2L1 Glucose 1,6-bisphosphate synthase	PGM2L1	0	2.83	0	0	0	0	FALSE	TRUE	FALSE	1
P61964	WDR5 WD repeat-containing protein 5	WDR5	0.9	2.8	1.93	0	1.64	0.98	FALSE	TRUE	FALSE	1
Q9NS87	KIF15 Kinesin-like protein KIF15	KIF15	0	2.8	0	0	0	0	FALSE	TRUE	FALSE	1
P40818	USP8 Ubiquitin carboxyl-terminal hydrolase 8	USP8	0	2.8	0	0	0.81	0	FALSE	TRUE	FALSE	1
O43660	PLRG1 Pleiotropic regulator 1	PLRG1	1.88	2.78	1.96	0	0.55	0.57	FALSE	TRUE	FALSE	1
Q13243	SRSF5 Serine/arginine-rich splicing factor 5	SRSF5	0	2.78	0	0	0	0	FALSE	TRUE	FALSE	1
Q32MZ4	LRRFIP1 Leucine-rich repeat flightless-interacting protein	LRRFIP1	0	2.76	1.92	0	0	0.76	FALSE	TRUE	FALSE	1
Q9H074	PAIP1 Polyadenylate-binding protein-interacting protein	PAIP1	1.49	2.75	1.77	0	0.38	0.22	FALSE	TRUE	FALSE	1
O00461	GOLIM4 Golgi integral membrane protein 4	GOLIM4	0	2.75	1.74	0	0	0.49	FALSE	TRUE	FALSE	1
H0YHG0	Uncharacterized protein	Uncharacterized	0	2.75	0	0	7.36	0	FALSE	TRUE	FALSE	1
P82979	SARNP SAP domain-containing ribonucleoprotein	SARNP	0	2.75	0	0	7.36	0	FALSE	TRUE	FALSE	1
Q16629	SRSF7 Serine/arginine-rich splicing factor 7	SRSF7	1.84	2.74	1.76	0.35	0.76	0	FALSE	TRUE	FALSE	1
O95747	OXSR1 Serine/threonine-protein kinase OSR1	OXSR1	1.9	2.73	1.9	0.46	1.11	0.32	FALSE	TRUE	FALSE	1
Q9H7E9	C8orf33 UPF0488 protein C8orf33	C8orf33	0	2.73	1.89	0	0.51	0.51	FALSE	TRUE	FALSE	1
H3BQ06	Uncharacterized protein	Uncharacterized	0	2.73	0	0	0	0	FALSE	TRUE	FALSE	1
Q15363	TMED2 Transmembrane emp24 domain-containing protein 2	TMED2	0	2.73	0	0	0	0	FALSE	TRUE	FALSE	1
Q9ULP9	TBC1D24 TBC1 domain family member 24	TBC1D24	0	2.73	0	0	0	0	FALSE	TRUE	FALSE	1
Q7KZ85	SUPT6H Transcription elongation factor SPT6	SUPT6H	0	2.72	1.36	0	0	0.18	FALSE	TRUE	FALSE	1
O00625	PIR Pirin	PIR	0	2.68	1.81	0	0.4	0	FALSE	TRUE	FALSE	1
Q04446	GBE1 1,4-alpha-glucan-branching enzyme	GBE1	1.89	2.68	1.54	0.09	1.36	0.31	FALSE	TRUE	FALSE	1
Q86U86	PBRM1 Protein polybromo-1	PBRM1	0	2.68	1.42	0	0.52	0	FALSE	TRUE	FALSE	1
Q86V48	LUZP1 Leucine zipper protein 1	LUZP1	1.94	2.68	1.25	0.03	0.9	0.25	FALSE	TRUE	FALSE	1
Q13769	THOC5 THO complex subunit 5 homolog	THOC5	0	2.68	0	0	0	0	FALSE	TRUE	FALSE	1
Q8IY18	SMC5 Structural maintenance of chromosomes protein 5	SMC5	0	2.68	0	0	0.13	0	FALSE	TRUE	FALSE	1
P62841	RPS15 40S ribosomal protein S15	RPS15	0	2.67	1.9	0	0.06	0	FALSE	TRUE	FALSE	1
Q9NZN4	EHD2 EH domain-containing protein 2	EHD2	1.64	2.67	1.8	0.36	0.49	0.15	FALSE	TRUE	FALSE	1
Q92572	AP3S1 AP-3 complex subunit sigma-1	AP3S1	0	2.67	0	0	0.36	0	FALSE	TRUE	FALSE	1
P00441	SOD1 Superoxide dismutase	SOD1	0	2.66	1.82	0	0	0.26	FALSE	TRUE	FALSE	1
Q53EL6	PDCD4 Programmed cell death protein 4	PDCD4	1.87	2.66	1.75	0.84	0.73	0.24	FALSE	TRUE	FALSE	1
Q8IYI6	EXOC8 Exocyst complex component 8	EXOC8	0	2.66	1.65	0	0.98	0.41	FALSE	TRUE	FALSE	1
O60547	GMDS GDP-mannose 4,6 dehydratase	GMDS	0	2.66	0	0	0.03	0	FALSE	TRUE	FALSE	1
Q9BVK6	TMED9 Transmembrane emp24 domain-containing protein 9	TMED9	0	2.66	0	0	0.53	0	FALSE	TRUE	FALSE	1
Q13144	EIF2B5 Translation initiation factor eIF-2B subunit epsil	EIF2B5	0	2.65	1.26	0	0	0.13	FALSE	TRUE	FALSE	1
Q96Q11	TRNT1 CCA tRNA nucleotidyltransferase 1, mitochondrial	TRNT1	0	2.63	1.96	0	0	0	FALSE	TRUE	FALSE	1
Q15126	PMVK Phosphomevalonate kinase	PMVK	0	2.63	1.92	0	0.3	0.41	FALSE	TRUE	FALSE	1
O75832	PSMD10 26S proteasome non-ATPase regulatory subunit 10	PSMD10	0	2.63	0	0	0	0	FALSE	TRUE	FALSE	1
Q9UGV2	NDRG3 Protein NDRG3	NDRG3	0	2.63	0	0	0	0	FALSE	TRUE	FALSE	1
Reverse_Q9NVE4	CCDC87 Coiled-coil domain-containing protein 87	CCDC87	0	2.63	0	0	0	0	FALSE	TRUE	FALSE	1
Q9Y247	FAM50B Protein FAM50B	FAM50B	0	2.63	0	0	1	0	FALSE	TRUE	FALSE	1
O60762	DPM1 Dolichol-phosphate mannosyltransferase	DPM1	0	2.62	1.82	0	0	0	FALSE	TRUE	FALSE	1
Q9BZZ5	API5 Apoptosis inhibitor 5	API5	1.03	2.62	1.61	0.75	0.39	0.51	FALSE	TRUE	FALSE	1
Q99426	TBCB Tubulin-folding cofactor B	TBCB	0.85	2.61	1.5	0	0.38	0	FALSE	TRUE	FALSE	1
Q07955	SRSF1 Serine/arginine-rich splicing factor 1	SRSF1	1.44	2.61	1.24	1.18	0.67	0.59	FALSE	TRUE	FALSE	1
O75131	CPNE3 Copine-3	CPNE3	1.96	2.6	1.83	0.9	3.89	0.13	FALSE	TRUE	FALSE	1
Q13576	IQGAP2 Ras GTPase-activating-like protein IQGAP2	IQGAP2	1.81	2.6	1.66	0.23	1.1	0.18	FALSE	TRUE	FALSE	1
O75530	EED Polycomb protein EED	EED	0	2.6	0	0	0	0	FALSE	TRUE	FALSE	1
O94979	SEC31A Protein transport protein Sec31A	SEC31A	1.75	2.59	1.84	1.22	3.58	0.54	FALSE	TRUE	FALSE	1
P62906	RPL10A 60S ribosomal protein L10a	RPL10A	1.89	2.59	1.23	0.48	0.26	0.26	FALSE	TRUE	FALSE	1
Q96KB5	PBK Lymphokine-activated killer T-cell-originated prot	PBK	0	2.59	0	0	0	0	FALSE	TRUE	FALSE	1
Q14166	TTLL12 Tubulin--tyrosine ligase-like protein 12	TTLL12	1.92	2.58	1.62	0.1	0.16	0.67	FALSE	TRUE	FALSE	1
Q96KR1	ZFR Zinc finger RNA-binding protein	ZFR	1.58	2.58	1.41	0.71	0.54	0.34	FALSE	TRUE	FALSE	1
P08621	SNRNP70 U1 small nuclear ribonucleoprotein 70 kDa	SNRNP70	1.81	2.58	1.3	0.63	0	0.26	FALSE	TRUE	FALSE	1
P43155	CRAT Carnitine O-acetyltransferase	CRAT	0	2.58	1.21	0	0	0.02	FALSE	TRUE	FALSE	1
P46778	RPL21 60S ribosomal protein L21	RPL21	0	2.57	1.17	0	0.28	0.57	FALSE	TRUE	FALSE	1
P18077	RPL35A 60S ribosomal protein L35a	RPL35A	1.62	2.57	1.04	0.6	0	0.18	FALSE	TRUE	FALSE	1
Q9Y383	LUC7L2 Putative RNA-binding protein Luc7-like 2	LUC7L2	1.67	2.56	1.38	0.2	0.56	0.19	FALSE	TRUE	FALSE	1
P36404	ARL2 ADP-ribosylation factor-like protein 2	ARL2	0	2.56	0	0	0	0	FALSE	TRUE	FALSE	1
Q9H0W9	C11orf54 Ester hydrolase C11orf54	C11orf54	0	2.55	0	0	0	0	FALSE	TRUE	FALSE	1
Q9Y2L1	DIS3 Exosome complex exonuclease RRP44	DIS3	1.71	2.54	1.89	0	0.65	0.25	FALSE	TRUE	FALSE	1
Q13564	NAE1 NEDD8-activating enzyme E1 regulatory subunit	NAE1	1.49	2.54	1.83	0.03	0.03	0.32	FALSE	TRUE	FALSE	1
O14777	NDC80 Kinetochore protein NDC80 homolog	NDC80	0	2.54	1.53	0	0.15	0.22	FALSE	TRUE	FALSE	1
Q8NCW5	APOA1BP NAD(P)H-hydrate epimerase	APOA1BP	0.26	2.54	0	0	0.84	0	FALSE	TRUE	FALSE	1
Q7LBR1	CHMP1B Charged multivesicular body protein 1b	CHMP1B	0	2.54	0	0	0.25	0	FALSE	TRUE	FALSE	1
O60826	CCDC22 Coiled-coil domain-containing protein 22	CCDC22	0	2.53	0	0	0	0	FALSE	TRUE	FALSE	1
O60508	CDC40 Pre-mRNA-processing factor 17	CDC40	0	2.52	1.68	0	0	0	FALSE	TRUE	FALSE	1
Q9H0C8	ILKAP Integrin-linked kinase-associated serine/threonine	ILKAP	0	2.52	0	0	0	0	FALSE	TRUE	FALSE	1
P54652	HSPA2 Heat shock-related 70 kDa protein 2	HSPA2	0	2.5	1.88	0	1.41	0.62	FALSE	TRUE	FALSE	1
P56545	CTBP2 C-terminal-binding protein 2	CTBP2	0	2.5	1.55	0	0.16	0.79	FALSE	TRUE	FALSE	1
P17655	CAPN2 Calpain-2 catalytic subunit	CAPN2	1.57	2.5	1.52	0.64	0.92	2.88	FALSE	TRUE	FALSE	1
O43396	TXNL1 Thioredoxin-like protein 1	TXNL1	0	2.49	1.92	0	0.31	0.16	FALSE	TRUE	FALSE	1
Q8TAQ2	SMARCC2 SWI/SNF complex subunit SMARCC2	SMARCC2	1.84	2.48	1.75	0.42	1.52	0.39	FALSE	TRUE	FALSE	1
Q6YHK3	CD109 CD109 antigen	CD109	0	2.48	1.66	0	1.52	0.67	FALSE	TRUE	FALSE	1
O43491	EPB41L2 Band 4.1-like protein 2	EPB41L2	1.73	2.48	1.44	0	1	0.46	FALSE	TRUE	FALSE	1
Q13042	CDC16 Cell division cycle protein 16 homolog	CDC16	0	2.48	1.39	0	0.9	0.06	FALSE	TRUE	FALSE	1
O60942	RNGTT mRNA-capping enzyme	RNGTT	0	2.48	0	0	0	0	FALSE	TRUE	FALSE	1
P62736	ACTA2 Actin, aortic smooth muscle	ACTA2	0	2.47	1.95	0	0.29	0.51	FALSE	TRUE	FALSE	1
O60313	OPA1 Dynamin-like 120 kDa protein, mitochondrial	OPA1	0	2.47	1.95	0	0.3	0.28	FALSE	TRUE	FALSE	1
Q02750	MAP2K1 Dual specificity mitogen-activated protein kinase	MAP2K1	0	2.47	1.92	0	0	0.28	FALSE	TRUE	FALSE	1
Q6YP21	CCBL2 Kynurenine--oxoglutarate transaminase 3	CCBL2	0	2.47	0	0	1.3	0	FALSE	TRUE	FALSE	1
P62701	RPS4X 40S ribosomal protein S4, X isoform	RPS4X	1.83	2.46	1.65	0.35	0.3	0.32	FALSE	TRUE	FALSE	1
P51812	RPS6KA3 Ribosomal protein S6 kinase alpha-3	RPS6KA3	1.7	2.46	1.56	0	0.19	0.21	FALSE	TRUE	FALSE	1
Q16775	HAGH Hydroxyacylglutathione hydrolase, mitochondrial	HAGH	0	2.46	0	0	0	0	FALSE	TRUE	FALSE	1
P22033	MUT Methylmalonyl-CoA mutase, mitochondrial	MUT	1.62	2.45	1.73	0.02	0.68	0.11	FALSE	TRUE	FALSE	1
P35222	CTNNB1 Catenin beta-1	CTNNB1	1.55	2.45	1.19	0	0.47	0.32	FALSE	TRUE	FALSE	1
P14923	JUP Junction plakoglobin	JUP	1.75	2.45	1.02	0.27	0.47	0.09	FALSE	TRUE	FALSE	1
Q15555	MAPRE2 Microtubule-associated protein RP/EB family member	MAPRE2	0	2.45	0	0	0	0	FALSE	TRUE	FALSE	1
Q9C0C9	UBE2O Ubiquitin-conjugating enzyme E2 O	UBE2O	0	2.45	0	0	0.13	0	FALSE	TRUE	FALSE	1
Q9ULT8	HECTD1 E3 ubiquitin-protein ligase HECTD1	HECTD1	1.69	2.43	1.48	0	0	0.05	FALSE	TRUE	FALSE	1
Q96C86	DCPS m7GpppX diphosphatase	DCPS	0	2.43	0	0	0	0	FALSE	TRUE	FALSE	1
Q9BXB5	OSBPL10 Oxysterol-binding protein-related protein 10	OSBPL10	1.88	2.42	1.56	0	2.58	0.17	FALSE	TRUE	FALSE	1
Q10713	PMPCA Mitochondrial-processing peptidase subunit alpha	PMPCA	0	2.42	1.18	0	1.24	0.29	FALSE	TRUE	FALSE	1
P11233	RALA Ras-related protein Ral-A	RALA	0.87	2.41	1.27	0	0.18	0.19	FALSE	TRUE	FALSE	1
Q8IX01	SUGP2 SURP and G-patch domain-containing protein 2	SUGP2	0	2.4	1.08	0	0.42	0.27	FALSE	TRUE	FALSE	1
P61026	RAB10 Ras-related protein Rab-10	RAB10	0	2.39	1.98	0	0.3	0	FALSE	TRUE	FALSE	1
Q9UNM6	PSMD13 26S proteasome non-ATPase regulatory subunit 13	PSMD13	1.75	2.39	1.86	0.36	0.27	0.28	FALSE	TRUE	FALSE	1
Q01995	TAGLN Transgelin	TAGLN	1.92	2.39	1.8	0.47	0.76	0.21	FALSE	TRUE	FALSE	1
Q13363	CTBP1 C-terminal-binding protein 1	CTBP1	0	2.39	1.75	0	0	0.69	FALSE	TRUE	FALSE	1
Q9H0S4	DDX47 Probable ATP-dependent RNA helicase DDX47	DDX47	1.66	2.39	1.7	0	0	0.45	FALSE	TRUE	FALSE	1
Q96JJ3	ELMO2 Engulfment and cell motility protein 2	ELMO2	1.47	2.39	1.66	0	0	0.07	FALSE	TRUE	FALSE	1
P61916	NPC2 Epididymal secretory protein E1	NPC2	0	2.39	0	0	0	0	FALSE	TRUE	FALSE	1
Q86XP3	DDX42 ATP-dependent RNA helicase DDX42	DDX42	0	2.38	1.85	0	0.81	0.27	FALSE	TRUE	FALSE	1
Q6P3W7	SCYL2 SCY1-like protein 2	SCYL2	0	2.38	1.71	0	0	0.18	FALSE	TRUE	FALSE	1
P49959	MRE11A Double-strand break repair protein MRE11A	MRE11A	1.36	2.38	1.66	0.6	6.2	0.34	FALSE	TRUE	FALSE	1
Q99873	PRMT1 Protein arginine N-methyltransferase 1	PRMT1	1.86	2.38	1.6	0.45	0.42	0.29	FALSE	TRUE	FALSE	1
Q12905	ILF2 Interleukin enhancer-binding factor 2	ILF2	1.66	2.38	1.54	1.84	0.6	1.06	FALSE	TRUE	FALSE	1
Q969X5	ERGIC1 Endoplasmic reticulum-Golgi intermediate compartme	ERGIC1	1.74	2.38	1.3	0.25	0.42	0.17	FALSE	TRUE	FALSE	1
P15374	UCHL3 Ubiquitin carboxyl-terminal hydrolase isozyme L3	UCHL3	0	2.38	0	0	0	0	FALSE	TRUE	FALSE	1
P46199	MTIF2 Translation initiation factor IF-2, mitochondrial	MTIF2	0	2.38	0	0	0	0	FALSE	TRUE	FALSE	1
Q9NNW7	TXNRD2 Thioredoxin reductase 2, mitochondrial	TXNRD2	0	2.38	0	0	0.48	0	FALSE	TRUE	FALSE	1
Q9Y224	C14orf166 UPF0568 protein C14orf166	C14orf166	0	2.38	0	0	0.91	0	FALSE	TRUE	FALSE	1
Q92974	ARHGEF2 Rho guanine nucleotide exchange factor 2	ARHGEF2	0	2.37	1.97	0	0	1.06	FALSE	TRUE	FALSE	1
Q5VTR2	RNF20 E3 ubiquitin-protein ligase BRE1A	RNF20	0	2.37	1.89	0	1.19	0.52	FALSE	TRUE	FALSE	1
Q5TFE4	NT5DC1 5-nucleotidase domain-containing protein 1	NT5DC1	0	2.37	1.83	0	0.96	0.38	FALSE	TRUE	FALSE	1
P55039	DRG2 Developmentally-regulated GTP-binding protein 2	DRG2	0	2.37	1.79	0	0.51	0	FALSE	TRUE	FALSE	1
P46779	RPL28 60S ribosomal protein L28	RPL28	1.8	2.37	1.25	0.56	0.32	0.41	FALSE	TRUE	FALSE	1
P48147	PREP Prolyl endopeptidase	PREP	0	2.36	1.81	0	2.16	0.23	FALSE	TRUE	FALSE	1
Q9NYF8	BCLAF1 Bcl-2-associated transcription factor 1	BCLAF1	1.9	2.36	1.5	0.21	0.34	0.27	FALSE	TRUE	FALSE	1
P00374	DHFR Dihydrofolate reductase	DHFR	0	2.36	1.5	0	0.4	0.2	FALSE	TRUE	FALSE	1
Q5T6F2	UBAP2 Ubiquitin-associated protein 2	UBAP2	1.6	2.35	1.55	0.68	0.67	0.19	FALSE	TRUE	FALSE	1
Q9UBV2	SEL1L Protein sel-1 homolog 1	SEL1L	0	2.34	0	0	0	0	FALSE	TRUE	FALSE	1
O95376	ARIH2 E3 ubiquitin-protein ligase ARIH2	ARIH2	0	2.33	1.97	0	7.44	0	FALSE	TRUE	FALSE	1
O43143	DHX15 Putative pre-mRNA-splicing factor ATP-dependent RN	DHX15	1.86	2.33	1.94	0.56	0.73	0.36	FALSE	TRUE	FALSE	1
P15927	RPA2 Replication protein A 32 kDa subunit	RPA2	0	2.33	1.84	0	0.04	0.43	FALSE	TRUE	FALSE	1
P62266	RPS23 40S ribosomal protein S23	RPS23	1.85	2.33	1.82	0.04	0.92	0.53	FALSE	TRUE	FALSE	1
Q16513	PKN2 Serine/threonine-protein kinase N2	PKN2	1.65	2.33	1.7	0.5	0.48	1	FALSE	TRUE	FALSE	1
Q9UHG3	PCYOX1 Prenylcysteine oxidase 1	PCYOX1	1.97	2.33	1.58	6.97	0.83	0.04	FALSE	TRUE	FALSE	1
Q9Y2H6	FNDC3A Fibronectin type-III domain-containing protein 3A	FNDC3A	1.71	2.33	1.38	0	0.92	0.2	FALSE	TRUE	FALSE	1
Q9ULX3	NOB1 RNA-binding protein NOB1	NOB1	0	2.33	0	0	0.44	0	FALSE	TRUE	FALSE	1
P49207	RPL34 60S ribosomal protein L34	RPL34	1.69	2.32	1.04	0.18	0.24	0.47	FALSE	TRUE	FALSE	1
Q9NPF5	DMAP1 DNA methyltransferase 1-associated protein 1	DMAP1	0	2.32	0	0	0	0	FALSE	TRUE	FALSE	1
P60510	PPP4C Serine/threonine-protein phosphatase 4 catalytic s	PPP4C	0	2.32	0	0	0.54	0	FALSE	TRUE	FALSE	1
P55036	PSMD4 26S proteasome non-ATPase regulatory subunit 4	PSMD4	1.88	2.31	1.86	6.57	1.98	0.29	FALSE	TRUE	FALSE	1
Q15269	PWP2 Periodic tryptophan protein 2 homolog	PWP2	0	2.31	1.44	0	0	0.16	FALSE	TRUE	FALSE	1
Q96SU4	OSBPL9 Oxysterol-binding protein-related protein 9	OSBPL9	0	2.31	1.19	0	0.27	0	FALSE	TRUE	FALSE	1
Q5VT25	CDC42BPA Serine/threonine-protein kinase MRCK alpha	CDC42BPA	0	2.31	0	0	0	0	FALSE	TRUE	FALSE	1
Q7Z4W1	DCXR L-xylulose reductase	DCXR	0	2.3	1.73	0	0.4	0.11	FALSE	TRUE	FALSE	1
Q9NW15	ANO10 Anoctamin-10	ANO10	0	2.3	0	0	0	0	FALSE	TRUE	FALSE	1
O00567	NOP56 Nucleolar protein 56	NOP56	1.73	2.29	1.98	0.31	3.87	4.64	FALSE	TRUE	FALSE	1
Q14558	PRPSAP1 Phosphoribosyl pyrophosphate synthase-associated p	PRPSAP1	1.98	2.29	1.8	0.22	1.19	0.21	FALSE	TRUE	FALSE	1
Q16719	KYNU Kynureninase	KYNU	1.59	2.29	1.73	0.26	0.56	0.46	FALSE	TRUE	FALSE	1
Q9UHD1	CHORDC1 Cysteine and histidine-rich domain-containing prot	CHORDC1	1.86	2.29	1.56	0.31	0.72	0.47	FALSE	TRUE	FALSE	1
Q13200	PSMD2 26S proteasome non-ATPase regulatory subunit 2	PSMD2	1.67	2.29	1.54	0.56	0.65	0.43	FALSE	TRUE	FALSE	1
O43847	NRD1 Nardilysin	NRD1	1.99	2.29	1.48	0	1.04	0.38	FALSE	TRUE	FALSE	1
P51532	SMARCA4 Transcription activator BRG1	SMARCA4	1.83	2.29	1.33	0	0	0.16	FALSE	TRUE	FALSE	1
O60271	SPAG9 C-Jun-amino-terminal kinase-interacting protein 4	SPAG9	1.61	2.29	1.32	0.13	0.23	0	FALSE	TRUE	FALSE	1
Q9NPD3	EXOSC4 Exosome complex component RRP41	EXOSC4	0	2.29	0	0	0	0	FALSE	TRUE	FALSE	1
Q04760	GLO1 Lactoylglutathione lyase	GLO1	0	2.29	0	0	0.54	0	FALSE	TRUE	FALSE	1
Q92930	RAB8B Ras-related protein Rab-8B	RAB8B	0	2.29	0	0	0.86	0	FALSE	TRUE	FALSE	1
Q8N543	OGFOD1 2-oxoglutarate and iron-dependent oxygenase domain	OGFOD1	0	2.28	1.93	0	0.37	0	FALSE	TRUE	FALSE	1
Q96P70	IPO9 Importin-9	IPO9	1.77	2.28	1.44	0.72	0.84	0.26	FALSE	TRUE	FALSE	1
P11171	EPB41 Protein 4.1	EPB41	0	2.27	1.78	0	0.81	0.24	FALSE	TRUE	FALSE	1
I3L080	HDGFRP2 Hepatoma-derived growth factor-related protein 2	HDGFRP2	0	2.27	0	0	0	0	FALSE	TRUE	FALSE	1
Q9H4F8	SMOC1 SPARC-related modular calcium-binding protein 1	SMOC1	0	2.27	0	0	0	0	FALSE	TRUE	FALSE	1
P10619	CTSA Lysosomal protective protein	CTSA	0	2.26	1.65	0	0	0	FALSE	TRUE	FALSE	1
Q8N163	KIAA1967 DBIRD complex subunit KIAA1967	KIAA1967	1.85	2.26	1.59	0.52	1.1	5.08	FALSE	TRUE	FALSE	1
Q9HA77	CARS2 Probable cysteine--tRNA ligase, mitochondrial	CARS2	1.56	2.26	1.58	0.14	0.14	0.43	FALSE	TRUE	FALSE	1
P26373	RPL13 60S ribosomal protein L13	RPL13	1.75	2.26	1.56	0.17	0.34	0.21	FALSE	TRUE	FALSE	1
Q9NTI5	PDS5B Sister chromatid cohesion protein PDS5 homolog B	PDS5B	1.08	2.26	1.55	0	0.53	5.48	FALSE	TRUE	FALSE	1
Q00765	REEP5 Receptor expression-enhancing protein 5	REEP5	1.84	2.26	1.47	0.27	0	0.35	FALSE	TRUE	FALSE	1
Q12907	LMAN2 Vesicular integral-membrane protein VIP36	LMAN2	1.73	2.26	1.22	0.16	0.4	0.27	FALSE	TRUE	FALSE	1
P82914	MRPS15 28S ribosomal protein S15, mitochondrial	MRPS15	1.66	2.26	0	0	0	0	FALSE	TRUE	FALSE	1
P26196	DDX6 Probable ATP-dependent RNA helicase DDX6	DDX6	1.7	2.25	1.87	0.15	0.48	0.43	FALSE	TRUE	FALSE	1
P35606	COPB2 Coatomer subunit beta	COPB2	1.94	2.25	1.73	3.22	4.1	0.38	FALSE	TRUE	FALSE	1
Q96M27	PRRC1 Protein PRRC1	PRRC1	0	2.25	0	0	0	0	FALSE	TRUE	FALSE	1
Q9Y3D6	FIS1 Mitochondrial fission 1 protein	FIS1	0	2.25	0	0	0	0	FALSE	TRUE	FALSE	1
Q8WYA6	CTNNBL1 Beta-catenin-like protein 1	CTNNBL1	0	2.25	0	0	0.37	0	FALSE	TRUE	FALSE	1
Q12768	KIAA0196 WASH complex subunit strumpellin	KIAA0196	1.7	2.24	1.64	0	0.4	0.22	FALSE	TRUE	FALSE	1
Q9NRV9	HEBP1 Heme-binding protein 1	HEBP1	0	2.24	0	0	0	0	FALSE	TRUE	FALSE	1
Q9BXS5	AP1M1 AP-1 complex subunit mu-1	AP1M1	1.89	2.23	1.96	0	0.34	0	FALSE	TRUE	FALSE	1
Q9BUQ8	DDX23 Probable ATP-dependent RNA helicase DDX23	DDX23	1.8	2.23	1.72	0.54	3.51	4	FALSE	TRUE	FALSE	1
Q9H254	SPTBN4 Spectrin beta chain, non-erythrocytic 4	SPTBN4	0	2.23	1.65	0	0.46	0.19	FALSE	TRUE	FALSE	1
P51571	SSR4 Translocon-associated protein subunit delta	SSR4	1.85	2.23	1.36	0.48	0.54	0.45	FALSE	TRUE	FALSE	1
P24844	MYL9 Myosin regulatory light polypeptide 9	MYL9	1.93	2.23	0	0	0.56	0	FALSE	TRUE	FALSE	1
P62857	RPS28 40S ribosomal protein S28	RPS28	0	2.23	0	0	0	0	FALSE	TRUE	FALSE	1
Q92466	DDB2 DNA damage-binding protein 2	DDB2	0	2.22	1.71	0	0	0.75	FALSE	TRUE	FALSE	1
P62244	RPS15A 40S ribosomal protein S15a	RPS15A	1.7	2.22	1.63	0.22	0.24	0.32	FALSE	TRUE	FALSE	1
P78344	EIF4G2 Eukaryotic translation initiation factor 4 gamma 2	EIF4G2	1.7	2.21	1.85	0.88	0.54	0.44	FALSE	TRUE	FALSE	1
P04818	TYMS Thymidylate synthase	TYMS	0	2.21	1.76	0	0.45	0.35	FALSE	TRUE	FALSE	1
P62714	PPP2CB Serine/threonine-protein phosphatase 2A catalytic	PPP2CB	0	2.21	1.63	0	0.69	0	FALSE	TRUE	FALSE	1
Q8N766	EMC1 ER membrane protein complex subunit 1	EMC1	0	2.21	1.48	0	0.14	0.26	FALSE	TRUE	FALSE	1
P62829	RPL23 60S ribosomal protein L23	RPL23	1.88	2.21	1.32	0.25	0.29	0.59	FALSE	TRUE	FALSE	1
P62834	RAP1A Ras-related protein Rap-1A	RAP1A	0	2.21	1.31	0	0	0	FALSE	TRUE	FALSE	1
O43776	NARS Asparagine--tRNA ligase, cytoplasmic	NARS	1.98	2.2	1.61	0.48	0.5	0.31	FALSE	TRUE	FALSE	1
P08134	RHOC Rho-related GTP-binding protein RhoC	RHOC	0	2.2	1.6	0	0.18	0.27	FALSE	TRUE	FALSE	1
Q96QK1	VPS35 Vacuolar protein sorting-associated protein 35	VPS35	1.5	2.2	1.58	0.52	0.7	0.39	FALSE	TRUE	FALSE	1
Q9H2P0	ADNP Activity-dependent neuroprotector homeobox protein	ADNP	1.9	2.2	1.57	0.13	4.84	0.47	FALSE	TRUE	FALSE	1
P61586	RHOA Transforming protein RhoA	RHOA	1.88	2.2	1.54	0.22	0.31	0.15	FALSE	TRUE	FALSE	1
P41252	IARS Isoleucine--tRNA ligase, cytoplasmic	IARS	1.84	2.2	1.53	0.37	0.68	0.25	FALSE	TRUE	FALSE	1
O95163	IKBKAP Elongator complex protein 1	IKBKAP	1.73	2.19	1.66	0.37	0.31	0.62	FALSE	TRUE	FALSE	1
Q9BR76	CORO1B Coronin-1B	CORO1B	1.49	2.19	1.5	0.18	0.28	0.24	FALSE	TRUE	FALSE	1
Q8N1G2	FTSJD2 Cap-specific mRNA (nucleoside-2-O-)-methyltransfe	FTSJD2	0	2.19	1.5	0	0	0.92	FALSE	TRUE	FALSE	1
Q10567	AP1B1 AP-1 complex subunit beta-1	AP1B1	1.62	2.19	1.46	0.18	0.42	0.29	FALSE	TRUE	FALSE	1
A5YKK6	CNOT1 CCR4-NOT transcription complex subunit 1	CNOT1	1.5	2.19	1.27	0.59	0.47	0.26	FALSE	TRUE	FALSE	1
P82673	MRPS35 28S ribosomal protein S35, mitochondrial	MRPS35	0	2.19	0	0	1.27	0	FALSE	TRUE	FALSE	1
P33991	MCM4 DNA replication licensing factor MCM4	MCM4	1.84	2.18	1.63	0.42	3.13	0.37	FALSE	TRUE	FALSE	1
Q14839	CHD4 Chromodomain-helicase-DNA-binding protein 4	CHD4	1.52	2.18	1.42	0.07	0.81	0.18	FALSE	TRUE	FALSE	1
O75150	RNF40 E3 ubiquitin-protein ligase BRE1B	RNF40	0	2.17	1.86	0	0.25	0.12	FALSE	TRUE	FALSE	1
Q9HB07	C12orf10 UPF0160 protein MYG1, mitochondrial	C12orf10	0	2.17	1.72	0	0.49	0.08	FALSE	TRUE	FALSE	1
P18124	RPL7 60S ribosomal protein L7	RPL7	1.92	2.17	1.69	0.48	0.53	0.57	FALSE	TRUE	FALSE	1
Q13616	CUL1 Cullin-1	CUL1	1.61	2.17	1.69	0.56	1.24	0.19	FALSE	TRUE	FALSE	1
O15067	PFAS Phosphoribosylformylglycinamidine synthase	PFAS	1.87	2.17	1.64	0.41	0.23	4.75	FALSE	TRUE	FALSE	1
Q8IWR0	ZC3H7A Zinc finger CCCH domain-containing protein 7A	ZC3H7A	0	2.17	1.6	0	0.65	0	FALSE	TRUE	FALSE	1
B0V043	VARS Valyl-tRNA synthetase	VARS	1.64	2.17	1.56	0.47	3.06	0.29	FALSE	TRUE	FALSE	1
P46087	NOP2 Putative ribosomal RNA methyltransferase NOP2	NOP2	1.86	2.17	1.46	0.3	1.11	0.33	FALSE	TRUE	FALSE	1
Q8N1F7	NUP93 Nuclear pore complex protein Nup93	NUP93	1.08	2.17	1.19	0.63	0.25	4.06	FALSE	TRUE	FALSE	1
Q9HC35	EML4 Echinoderm microtubule-associated protein-like 4	EML4	1.71	2.16	1.67	0.65	0.47	0.33	FALSE	TRUE	FALSE	1
Q9H4G0	EPB41L1 Band 4.1-like protein 1	EPB41L1	0	2.16	1.61	0	0.87	0.35	FALSE	TRUE	FALSE	1
P21333	FLNA Filamin-A	FLNA	1.95	2.16	1.6	0.99	1.19	0.96	FALSE	TRUE	FALSE	1
Q2TAL8	QRICH1 Glutamine-rich protein 1	QRICH1	0	2.16	1.1	0	0	0.09	FALSE	TRUE	FALSE	1
Q86Y82	STX12 Syntaxin-12	STX12	0	2.16	0	0	1.73	0	FALSE	TRUE	FALSE	1
P78371	CCT2 T-complex protein 1 subunit beta	CCT2	1.97	2.15	1.68	0.56	0.53	0.27	FALSE	TRUE	FALSE	1
Q9NVP1	DDX18 ATP-dependent RNA helicase DDX18	DDX18	1.27	2.15	1.64	0	0.4	0.81	FALSE	TRUE	FALSE	1
P54886	ALDH18A1 Delta-1-pyrroline-5-carboxylate synthase	ALDH18A1	1.79	2.15	1.5	0.42	0.42	0.22	FALSE	TRUE	FALSE	1
Q13620	CUL4B Cullin-4B	CUL4B	1.73	2.15	1.5	3.18	0.32	0.52	FALSE	TRUE	FALSE	1
P28370	SMARCA1 Probable global transcription activator SNF2L1	SMARCA1	0	2.15	1.47	0	0.12	0.75	FALSE	TRUE	FALSE	1
Q8NC51	SERBP1 Plasminogen activator inhibitor 1 RNA-binding prot	SERBP1	1.84	2.15	1.44	0.4	0.36	0.34	FALSE	TRUE	FALSE	1
Q8WW12	PCNP PEST proteolytic signal-containing nuclear protein	PCNP	0	2.15	0	0	1.51	0	FALSE	TRUE	FALSE	1
O75340	PDCD6 Programmed cell death protein 6	PDCD6	1.69	2.14	1.89	0	0.13	0.33	FALSE	TRUE	FALSE	1
P30566	ADSL Adenylosuccinate lyase	ADSL	1.48	2.14	1.63	0.44	0.47	0.09	FALSE	TRUE	FALSE	1
O15344	MID1 Midline-1	MID1	0	2.14	1.62	0	0	0	FALSE	TRUE	FALSE	1
O95834	EML2 Echinoderm microtubule-associated protein-like 2	EML2	0	2.14	1.59	0	0.19	0	FALSE	TRUE	FALSE	1
Q9BTE3	MCMBP Mini-chromosome maintenance complex-binding protei	MCMBP	0	2.14	1.55	0	0	0.56	FALSE	TRUE	FALSE	1
Q86W92	PPFIBP1 Liprin-beta-1	PPFIBP1	0	2.14	1.51	0	0	0.17	FALSE	TRUE	FALSE	1
Q02978	SLC25A11 Mitochondrial 2-oxoglutarate/malate carrier protei	SLC25A11	1.67	2.14	1.42	0.13	0.33	0.55	FALSE	TRUE	FALSE	1
Q8WUM0	NUP133 Nuclear pore complex protein Nup133	NUP133	1.68	2.14	1.4	0	0	0.05	FALSE	TRUE	FALSE	1
P62280	RPS11 40S ribosomal protein S11	RPS11	1.67	2.14	1.38	0.29	0.24	0.41	FALSE	TRUE	FALSE	1
Q96ST3	SIN3A Paired amphipathic helix protein Sin3a	SIN3A	0	2.14	1.36	0	0.41	0.02	FALSE	TRUE	FALSE	1
Q9NP74	PALMD Palmdelphin	PALMD	1.76	2.14	1.34	0	0.21	0.1	FALSE	TRUE	FALSE	1
Q12830	BPTF Nucleosome-remodeling factor subunit BPTF	BPTF	0	2.14	0.94	0	0	0	FALSE	TRUE	FALSE	1
P20742	PZP Pregnancy zone protein	PZP	0	2.14	0	0	0	0	FALSE	TRUE	FALSE	1
Q9NZJ0	DTL Denticleless protein homolog	DTL	0	2.13	1.45	0	0	0.12	FALSE	TRUE	FALSE	1
Q14331	FRG1 Protein FRG1	FRG1	0	2.13	0	0	0	0	FALSE	TRUE	FALSE	1
P46734	MAP2K3 Dual specificity mitogen-activated protein kinase	MAP2K3	1.59	2.12	1.84	0	0.16	0	FALSE	TRUE	FALSE	1
Q13428	TCOF1 Treacle protein	TCOF1	1.89	2.12	1.72	0.55	0.58	0.5	FALSE	TRUE	FALSE	1
Q8IY81	FTSJ3 pre-rRNA processing protein FTSJ3	FTSJ3	1.82	2.12	1.71	0.56	0.49	0.04	FALSE	TRUE	FALSE	1
O14744	PRMT5 Protein arginine N-methyltransferase 5	PRMT5	1.9	2.12	1.7	0.43	0.31	0.17	FALSE	TRUE	FALSE	1
Q15029	EFTUD2 116 kDa U5 small nuclear ribonucleoprotein compone	EFTUD2	1.74	2.12	1.68	0.65	2.83	0.45	FALSE	TRUE	FALSE	1
Q9NQG5	RPRD1B Regulation of nuclear pre-mRNA domain-containing p	RPRD1B	0	2.12	1.6	0	0.42	0.02	FALSE	TRUE	FALSE	1
P31942	HNRNPH3 Heterogeneous nuclear ribonucleoprotein H3	HNRNPH3	1.99	2.12	1.54	0.17	4.92	0.18	FALSE	TRUE	FALSE	1
Q9BZH6	WDR11 WD repeat-containing protein 11	WDR11	0	2.12	0.78	0	0.95	0	FALSE	TRUE	FALSE	1
Q9UHX1	PUF60 Poly(U)-binding-splicing factor PUF60	PUF60	1.97	2.11	1.97	8.1	0.13	5.33	FALSE	TRUE	FALSE	1
Q9BY42	C20orf43 UPF0549 protein C20orf43	C20orf43	0	2.11	1.5	0	0	0	FALSE	TRUE	FALSE	1
Q9BXJ9	NAA15 N-alpha-acetyltransferase 15, NatA auxiliary subun	NAA15	1.8	2.1	1.74	0.52	0.72	0.29	FALSE	TRUE	FALSE	1
Q92922	SMARCC1 SWI/SNF complex subunit SMARCC1	SMARCC1	1.84	2.1	1.7	6.64	2.1	0.29	FALSE	TRUE	FALSE	1
O00267	SUPT5H Transcription elongation factor SPT5	SUPT5H	1.79	2.1	1.62	0.33	0.36	0.16	FALSE	TRUE	FALSE	1
P46013	MKI67 Antigen KI-67	MKI67	0	2.1	1.6	0	1.48	0.51	FALSE	TRUE	FALSE	1
Q969U7	PSMG2 Proteasome assembly chaperone 2	PSMG2	1.93	2.1	1.49	0	0	0	FALSE	TRUE	FALSE	1
P84103	SRSF3 Serine/arginine-rich splicing factor 3	SRSF3	0	2.1	1.43	0	0	0.11	FALSE	TRUE	FALSE	1
P57772	EEFSEC Selenocysteine-specific elongation factor	EEFSEC	0	2.1	0	0	0	0	FALSE	TRUE	FALSE	1
Q6DD88	ATL3 Atlastin-3	ATL3	1.85	2.09	1.54	0.27	1.49	0.45	FALSE	TRUE	FALSE	1
Q8TEQ6	GEMIN5 Gem-associated protein 5	GEMIN5	1.78	2.09	1.34	0.63	0.76	0.26	FALSE	TRUE	FALSE	1
Q9Y4X5	ARIH1 E3 ubiquitin-protein ligase ARIH1	ARIH1	1.72	2.08	1.84	0.42	0.1	0.37	FALSE	TRUE	FALSE	1
O00422	SAP18 Histone deacetylase complex subunit SAP18	SAP18	0	2.08	1.8	0	0.05	0.28	FALSE	TRUE	FALSE	1
Q9NP72	RAB18 Ras-related protein Rab-18	RAB18	1.09	2.08	1.61	0	0.33	0	FALSE	TRUE	FALSE	1
P54136	RARS Arginine--tRNA ligase, cytoplasmic	RARS	1.88	2.08	1.6	2.98	0.42	0.25	FALSE	TRUE	FALSE	1
Q9UID3	VPS51 Vacuolar protein sorting-associated protein 51 hom	VPS51	0	2.08	1.57	0	0	0	FALSE	TRUE	FALSE	1
Q9UPN3	MACF1 Microtubule-actin cross-linking factor 1, isoforms	MACF1	0	2.08	1.47	0	0.08	2.51	FALSE	TRUE	FALSE	1
Q29718	HLA-B HLA class I histocompatibility antigen, B-82 alpha	HLA-B	0	2.08	1.46	0	0.6	1.61	FALSE	TRUE	FALSE	1
O43681	ASNA1 ATPase ASNA1	ASNA1	0	2.08	1.43	0	0.28	0.72	FALSE	TRUE	FALSE	1
Q9HCS7	XAB2 Pre-mRNA-splicing factor SYF1	XAB2	1.49	2.08	1.42	0	0	0.26	FALSE	TRUE	FALSE	1
P63010	AP2B1 AP-2 complex subunit beta	AP2B1	1.88	2.08	1.39	0.46	0.59	0.38	FALSE	TRUE	FALSE	1
Q04726	TLE3 Transducin-like enhancer protein 3	TLE3	0	2.08	0	0	0	0	FALSE	TRUE	FALSE	1
P16104	H2AFX Histone H2A.x	H2AFX	0	2.08	0	0	1.32	0	FALSE	TRUE	FALSE	1
Q7L7L0	HIST3H2A Histone H2A type 3	HIST3H2A	0	2.08	0	0	1.32	0	FALSE	TRUE	FALSE	1
Q96QV6	HIST1H2AA Histone H2A type 1-A	HIST1H2AA	0	2.08	0	0	1.32	0	FALSE	TRUE	FALSE	1
P26639	TARS Threonine--tRNA ligase, cytoplasmic	TARS	1.94	2.07	1.7	0.43	0.38	0.41	FALSE	TRUE	FALSE	1
Q99627	COPS8 COP9 signalosome complex subunit 8	COPS8	0	2.07	1.5	0	0	0	FALSE	TRUE	FALSE	1
Q86XI2	NCAPG2 Condensin-2 complex subunit G2	NCAPG2	0	2.07	1.16	0	0.42	0.57	FALSE	TRUE	FALSE	1
Q96S55	WRNIP1 ATPase WRNIP1	WRNIP1	0	2.07	0	0	0	0	FALSE	TRUE	FALSE	1
P06865	HEXA Beta-hexosaminidase subunit alpha	HEXA	1.32	2.06	1.77	0	0	0	FALSE	TRUE	FALSE	1
Q13263	TRIM28 Transcription intermediary factor 1-beta	TRIM28	1.98	2.06	1.75	0.58	0.24	0.48	FALSE	TRUE	FALSE	1
Q13228	SELENBP1 Selenium-binding protein 1	SELENBP1	1.51	2.06	1.64	0.51	0.67	0.24	FALSE	TRUE	FALSE	1
P14324	FDPS Farnesyl pyrophosphate synthase	FDPS	1.95	2.06	1.58	0.44	0.54	0.34	FALSE	TRUE	FALSE	1
Q14498	RBM39 RNA-binding protein 39	RBM39	1.78	2.06	1.53	0.57	0.62	0.13	FALSE	TRUE	FALSE	1
Q5JSH3	WDR44 WD repeat-containing protein 44	WDR44	1.72	2.06	1.49	0.43	0	0.12	FALSE	TRUE	FALSE	1
Q16531	DDB1 DNA damage-binding protein 1	DDB1	1.39	2.06	1.49	0.43	0.73	2.41	FALSE	TRUE	FALSE	1
Q09161	NCBP1 Nuclear cap-binding protein subunit 1	NCBP1	1.63	2.06	1.34	0.5	0.49	0.11	FALSE	TRUE	FALSE	1
O60264	SMARCA5 SWI/SNF-related matrix-associated actin-dependent	SMARCA5	0	2.06	1.32	0	0.63	0.62	FALSE	TRUE	FALSE	1
Q13523	PRPF4B Serine/threonine-protein kinase PRP4 homolog	PRPF4B	0	2.06	0	0	0	0	FALSE	TRUE	FALSE	1
Q13614	MTMR2 Myotubularin-related protein 2	MTMR2	0	2.06	0	0	0	0	FALSE	TRUE	FALSE	1
Q8TB72	PUM2 Pumilio homolog 2	PUM2	0	2.06	0	0	0.32	0	FALSE	TRUE	FALSE	1
P56192	MARS Methionine--tRNA ligase, cytoplasmic	MARS	1.61	2.05	1.97	0.63	0.6	0.39	FALSE	TRUE	FALSE	1
Q96T37	RBM15 Putative RNA-binding protein 15	RBM15	0	2.05	1.9	0	0	0.25	FALSE	TRUE	FALSE	1
O43684	BUB3 Mitotic checkpoint protein BUB3	BUB3	1.9	2.05	1.59	1	0.5	0.63	FALSE	TRUE	FALSE	1
P08754	GNAI3 Guanine nucleotide-binding protein G(k) subunit al	GNAI3	1.74	2.05	1.59	0.63	0.44	0.42	FALSE	TRUE	FALSE	1
Q01433	AMPD2 AMP deaminase 2	AMPD2	0	2.05	1.55	0	0	0	FALSE	TRUE	FALSE	1
Q14244	MAP7 Ensconsin	MAP7	1.02	2.05	1.43	0.44	0.37	0	FALSE	TRUE	FALSE	1
Q96KP1	EXOC2 Exocyst complex component 2	EXOC2	0	2.05	1.37	0	0.27	0.34	FALSE	TRUE	FALSE	1
P10398	ARAF Serine/threonine-protein kinase A-Raf	ARAF	0	2.05	1.31	0	0	0.18	FALSE	TRUE	FALSE	1
A6NHL2	TUBAL3 Tubulin alpha chain-like 3	TUBAL3	1.88	2.05	1.21	0.36	0.59	0.58	FALSE	TRUE	FALSE	1
Q6P1J9	CDC73 Parafibromin	CDC73	1.36	2.05	0.94	0.14	0.13	0.81	FALSE	TRUE	FALSE	1
Q9H0U6	MRPL18 39S ribosomal protein L18, mitochondrial	MRPL18	0	2.04	1.93	0	0.45	0.16	FALSE	TRUE	FALSE	1
P45974	USP5 Ubiquitin carboxyl-terminal hydrolase 5	USP5	1.96	2.04	1.83	0.46	0.67	0.48	FALSE	TRUE	FALSE	1
Q13347	EIF3I Eukaryotic translation initiation factor 3 subunit	EIF3I	1.72	2.04	1.65	0.57	0.23	0.14	FALSE	TRUE	FALSE	1
P00390	GSR Glutathione reductase, mitochondrial	GSR	1.94	2.04	1.6	0.59	0.22	0.42	FALSE	TRUE	FALSE	1
Q14671	PUM1 Pumilio homolog 1	PUM1	0	2.04	1.51	0	0.32	0.64	FALSE	TRUE	FALSE	1
P33993	MCM7 DNA replication licensing factor MCM7	MCM7	1.93	2.04	1.5	0.32	0.61	0.46	FALSE	TRUE	FALSE	1
Q29RF7	PDS5A Sister chromatid cohesion protein PDS5 homolog A	PDS5A	1.57	2.04	1.48	0.1	1.39	0.22	FALSE	TRUE	FALSE	1
Q13362	PPP2R5C Serine/threonine-protein phosphatase 2A 56 kDa reg	PPP2R5C	1.21	2.04	1.46	0.59	0.16	0.38	FALSE	TRUE	FALSE	1
P14735	IDE Insulin-degrading enzyme	IDE	1.94	2.04	1.4	6.61	2.59	0.13	FALSE	TRUE	FALSE	1
Q6PKG0	LARP1 La-related protein 1	LARP1	1.63	2.04	1.39	0.27	4.64	0.38	FALSE	TRUE	FALSE	1
Q9BQ67	GRWD1 Glutamate-rich WD repeat-containing protein 1	GRWD1	1.62	2.04	0	0	0.39	0	FALSE	TRUE	FALSE	1
O14562	UBFD1 Ubiquitin domain-containing protein UBFD1	UBFD1	0	2.04	0	0	0	0	FALSE	TRUE	FALSE	1
Q9H5V9	CXorf56 UPF0428 protein CXorf56	CXorf56	0	2.04	0	0	0	0	FALSE	TRUE	FALSE	1
Q5RI15	COX20 Cytochrome c oxidase protein 20 homolog	COX20	1.58	2.03	1.22	0.06	0	0	FALSE	TRUE	FALSE	1
P57088	TMEM33 Transmembrane protein 33	TMEM33	0	2.02	1.92	0	0.22	0.69	FALSE	TRUE	FALSE	1
Q9H4G4	GLIPR2 Golgi-associated plant pathogenesis-related protei	GLIPR2	0	2.02	1.9	0	0	0	FALSE	TRUE	FALSE	1
Q8NBJ5	GLT25D1 Procollagen galactosyltransferase 1	GLT25D1	1.79	2.02	1.81	0.25	0.55	0.24	FALSE	TRUE	FALSE	1
P42285	SKIV2L2 Superkiller viralicidic activity 2-like 2	SKIV2L2	1.66	2.02	1.7	0.45	2.17	4.23	FALSE	TRUE	FALSE	1
P47897	QARS Glutamine--tRNA ligase	QARS	1.51	2.02	1.53	0.93	2.78	0.27	FALSE	TRUE	FALSE	1
P07384	CAPN1 Calpain-1 catalytic subunit	CAPN1	1.85	2.02	1.52	0.12	0.43	0.23	FALSE	TRUE	FALSE	1
Q9NW13	RBM28 RNA-binding protein 28	RBM28	0	2.01	1.85	0	0.41	0.59	FALSE	TRUE	FALSE	1
Q9UJ72	ANXA10 Annexin A10	ANXA10	0	2.01	1.81	0	0.99	0	FALSE	TRUE	FALSE	1
Q15003	NCAPH Condensin complex subunit 2	NCAPH	1.16	2.01	1.79	0	0.37	0.35	FALSE	TRUE	FALSE	1
O75534	CSDE1 Cold shock domain-containing protein E1	CSDE1	1.42	2.01	1.77	0.28	0.39	3.85	FALSE	TRUE	FALSE	1
P25786	PSMA1 Proteasome subunit alpha type-1	PSMA1	1.98	2.01	1.67	0.23	0.27	0.3	FALSE	TRUE	FALSE	1
P61221	ABCE1 ATP-binding cassette sub-family E member 1	ABCE1	1.82	2.01	1.64	0.27	0.39	0.21	FALSE	TRUE	FALSE	1
Q9Y676	MRPS18B 28S ribosomal protein S18b, mitochondrial	MRPS18B	1.54	2.01	1.57	0	0	0	FALSE	TRUE	FALSE	1
Q6PD62	CTR9 RNA polymerase-associated protein CTR9 homolog	CTR9	1.05	2	1.94	0	0.67	0.35	FALSE	TRUE	FALSE	1
P63096	GNAI1 Guanine nucleotide-binding protein G(i) subunit al	GNAI1	1.74	2	1.54	0.72	0.39	0.47	FALSE	TRUE	FALSE	1
P52701	MSH6 DNA mismatch repair protein Msh6	MSH6	1.52	2	1.49	0.65	0.62	1	FALSE	TRUE	FALSE	1
P30486	HLA-B HLA class I histocompatibility antigen, B-48 alpha	HLA-B	1.46	2	1.48	0.39	1.02	0.04	FALSE	TRUE	FALSE	1
Q31610	HLA-B HLA class I histocompatibility antigen, B-81 alpha	HLA-B	1.46	2	1.48	0.39	1.02	0.04	FALSE	TRUE	FALSE	1
O75695	RP2 Protein XRP2	RP2	0	2	1.24	0	0.42	0	FALSE	TRUE	FALSE	1
Q9Y6K5	OAS3 2-5-oligoadenylate synthase 3	OAS3	0	2	0	0	0.06	0	FALSE	TRUE	FALSE	1
P30483	HLA-B HLA class I histocompatibility antigen, B-45 alpha	HLA-B	0	2	0	0	0.51	0	FALSE	TRUE	FALSE	1
P30487	HLA-B HLA class I histocompatibility antigen, B-49 alpha	HLA-B	0	2	0	0	0.51	0	FALSE	TRUE	FALSE	1
O15226	NKRF NF-kappa-B-repressing factor	NKRF	3.22	1.99	1.62	1.8	0.42	0.56	TRUE	FALSE	FALSE	1
P47914	RPL29 60S ribosomal protein L29	RPL29	2	1.99	1.91	0.04	0.14	0.4	TRUE	FALSE	FALSE	1
O43747	AP1G1 AP-1 complex subunit gamma-1	AP1G1	2.38	1.99	1.25	0.25	0.41	0.42	TRUE	FALSE	FALSE	1
Q6UW63	KDELC1 KDEL motif-containing protein 1	KDELC1	3.06	1.98	0	0	0	0	TRUE	FALSE	FALSE	1
P54709	ATP1B3 Sodium/potassium-transporting ATPase subunit beta-	ATP1B3	2.38	1.97	1.84	0	7.6	0.41	TRUE	FALSE	FALSE	1
P55795	HNRNPH2 Heterogeneous nuclear ribonucleoprotein H2	HNRNPH2	2.07	1.97	1.55	0.36	0.39	0.44	TRUE	FALSE	FALSE	1
Q9ULV4	CORO1C Coronin-1C	CORO1C	2.58	1.96	1.92	0.71	0.52	0.16	TRUE	FALSE	FALSE	1
Q9UKV8	EIF2C2 Protein argonaute-2	EIF2C2	8.12	1.96	1.71	9.74	0.6	0.45	TRUE	FALSE	FALSE	1
O75439	PMPCB Mitochondrial-processing peptidase subunit beta	PMPCB	2.16	1.96	1.77	0.21	0.35	0.62	TRUE	FALSE	FALSE	1
O95758	PTBP3 Polypyrimidine tract-binding protein 3	PTBP3	2.08	1.96	0	0	0	0	TRUE	FALSE	FALSE	1
Q9UHD8	SEPT9 Septin-9	2017-09-09	2.28	1.95	1.98	0.62	0.59	0.88	TRUE	FALSE	FALSE	1
P24941	CDK2 Cyclin-dependent kinase 2	CDK2	2.21	1.95	1.57	0.65	0.58	0.48	TRUE	FALSE	FALSE	1
P18085	ARF4 ADP-ribosylation factor 4	ARF4	2	1.95	1.49	0.35	1.15	0.08	TRUE	FALSE	FALSE	1
Q9UH65	SWAP70 Switch-associated protein 70	SWAP70	3	1.94	1.84	1.28	0.72	0.19	TRUE	FALSE	FALSE	1
Q9Y6G9	DYNC1LI1 Cytoplasmic dynein 1 light intermediate chain 1	DYNC1LI1	2.96	1.94	0	0.91	0	0	TRUE	FALSE	FALSE	1
Q04941	PLP2 Proteolipid protein 2	PLP2	2.05	1.94	1.77	0.1	0.04	0.28	TRUE	FALSE	FALSE	1
Q9Y2R9	MRPS7 28S ribosomal protein S7, mitochondrial	MRPS7	3.01	1.93	0	0	0.31	0	TRUE	FALSE	FALSE	1
Q9Y223	GNE Bifunctional UDP-N-acetylglucosamine 2-epimerase/N	GNE	1.5	1.93	2.38	0	0.22	7.47	FALSE	FALSE	TRUE	1
O43772	SLC25A20 Mitochondrial carnitine/acylcarnitine carrier prot	SLC25A20	3.1	1.91	1.61	0	0.48	0.14	TRUE	FALSE	FALSE	1
Q52LJ0	FAM98B Protein FAM98B	FAM98B	3.73	1.91	1.49	0	1.08	0.61	TRUE	FALSE	FALSE	1
Q9BQ52	ELAC2 Zinc phosphodiesterase ELAC protein 2	ELAC2	1.89	1.91	2.12	3.08	0.14	0.41	FALSE	FALSE	TRUE	1
Q9NTZ6	RBM12 RNA-binding protein 12	RBM12	2.28	1.91	1.81	0.17	0.19	0.56	TRUE	FALSE	FALSE	1
Q08499	PDE4D cAMP-specific 3,5-cyclic phosphodiesterase 4D	PDE4D	3.97	1.9	1.96	0	0	0	TRUE	FALSE	FALSE	1
P51149	RAB7A Ras-related protein Rab-7a	RAB7A	2.34	1.9	1.69	0.49	0.55	0.48	TRUE	FALSE	FALSE	1
Q9H3P7	ACBD3 Golgi resident protein GCP60	ACBD3	3.27	1.88	1.84	0	0.23	0	TRUE	FALSE	FALSE	1
O60488	ACSL4 Long-chain-fatty-acid--CoA ligase 4	ACSL4	2.56	1.88	1.67	1.22	2.18	0.55	TRUE	FALSE	FALSE	1
Q6IA86	ELP2 Elongator complex protein 2	ELP2	3.01	1.88	1.54	1.58	1.06	0.3	TRUE	FALSE	FALSE	1
Q9GZL7	WDR12 Ribosome biogenesis protein WDR12	WDR12	2.21	1.88	1.64	0.31	0.33	0.4	TRUE	FALSE	FALSE	1
Q6JUT2	TIRAP3 TIR domain-containing adapter molecule 2	TIRAP3	2.67	1.87	1.82	0.49	0.65	0	TRUE	FALSE	FALSE	1
Q9Y3B3	TMED7 Transmembrane emp24 domain-containing protein 7	TMED7	2.67	1.87	1.82	0.49	0.65	0	TRUE	FALSE	FALSE	1
P18031	PTPN1 Tyrosine-protein phosphatase non-receptor type 1	PTPN1	3.15	1.87	1.6	0	0.42	0.37	TRUE	FALSE	FALSE	1
Q6PJT7	ZC3H14 Zinc finger CCCH domain-containing protein 14	ZC3H14	3.21	1.87	1.51	3	0.12	0.32	TRUE	FALSE	FALSE	1
O75718	CRTAP Cartilage-associated protein	CRTAP	0	1.87	2.03	0	0	0.35	FALSE	FALSE	TRUE	1
O43707	ACTN4 Alpha-actinin-4	ACTN4	2.08	1.87	1.75	0.49	0.35	0.33	TRUE	FALSE	FALSE	1
O14880	MGST3 Microsomal glutathione S-transferase 3	MGST3	2.35	1.87	0	1.04	0	0	TRUE	FALSE	FALSE	1
Q6NVY1	HIBCH 3-hydroxyisobutyryl-CoA hydrolase, mitochondrial	HIBCH	2.78	1.86	0	0	1.05	0	TRUE	FALSE	FALSE	1
Q13610	PWP1 Periodic tryptophan protein 1 homolog	PWP1	0	1.86	2.02	0	0	0	FALSE	FALSE	TRUE	1
P12236	SLC25A6 ADP/ATP translocase 3	SLC25A6	2.05	1.86	1.69	1.16	0.5	1.01	TRUE	FALSE	FALSE	1
P05141	SLC25A5 ADP/ATP translocase 2	SLC25A5	2.13	1.86	1.66	0.47	0.48	0.28	TRUE	FALSE	FALSE	1
O43813	LANCL1 LanC-like protein 1	LANCL1	2.43	1.86	1.58	0.28	0.3	0.15	TRUE	FALSE	FALSE	1
Q92979	EMG1 Ribosomal RNA small subunit methyltransferase NEP1	EMG1	0	1.85	2.29	0	0	0	FALSE	FALSE	TRUE	1
O43583	DENR Density-regulated protein	DENR	0	1.85	2.05	0	0	0.25	FALSE	FALSE	TRUE	1
Q13112	CHAF1B Chromatin assembly factor 1 subunit B	CHAF1B	3.12	1.84	1.5	0.95	0.35	0.33	TRUE	FALSE	FALSE	1
Q9UHB6	LIMA1 LIM domain and actin-binding protein 1	LIMA1	0.86	1.84	2.09	0	0.46	3.64	FALSE	FALSE	TRUE	1
O15397	IPO8 Importin-8	IPO8	2.05	1.84	1.71	0.96	0.12	0.5	TRUE	FALSE	FALSE	1
P12814	ACTN1 Alpha-actinin-1	ACTN1	2.06	1.83	1.74	0.71	0.37	0.35	TRUE	FALSE	FALSE	1
Q9P2R3	ANKFY1 Ankyrin repeat and FYVE domain-containing protein	ANKFY1	2.03	1.83	1.27	0.52	0	0	TRUE	FALSE	FALSE	1
O60518	RANBP6 Ran-binding protein 6	RANBP6	0	1.81	15	0	6.66	0	FALSE	FALSE	TRUE	1
Q96CN7	ISOC1 Isochorismatase domain-containing protein 1	ISOC1	2.88	1.81	1.86	7.44	0.69	0.26	TRUE	FALSE	FALSE	1
Q15582	TGFBI Transforming growth factor-beta-induced protein ig	TGFBI	0	1.8	2.02	0	0	0.56	FALSE	FALSE	TRUE	1
P12235	SLC25A4 ADP/ATP translocase 1	SLC25A4	2.22	1.8	1.58	1.37	0.57	0.32	TRUE	FALSE	FALSE	1
Q9BPX3	NCAPG Condensin complex subunit 3	NCAPG	2.08	1.8	1.19	0.84	0.29	0.21	TRUE	FALSE	FALSE	1
Q8NB90	SPATA5 Spermatogenesis-associated protein 5	SPATA5	2.89	1.79	0	0	0	0	TRUE	FALSE	FALSE	1
Q15061	WDR43 WD repeat-containing protein 43	WDR43	2.07	1.79	1.66	3.41	0	0.08	TRUE	FALSE	FALSE	1
Q13057	COASY Bifunctional coenzyme A synthase	COASY	2.06	1.79	1.66	0	0.23	0.13	TRUE	FALSE	FALSE	1
Q9Y5M8	SRPRB Signal recognition particle receptor subunit beta	SRPRB	2.13	1.79	0	0.29	0.82	0	TRUE	FALSE	FALSE	1
Q9UI15	TAGLN3 Transgelin-3	TAGLN3	2.35	1.78	1.28	0	0.38	0.54	TRUE	FALSE	FALSE	1
Q9H0U3	MAGT1 Magnesium transporter protein 1	MAGT1	0	1.77	8.18	0	0.54	9.64	FALSE	FALSE	TRUE	1
Q9Y697	NFS1 Cysteine desulfurase, mitochondrial	NFS1	2.69	1.77	0	0	0	0	TRUE	FALSE	FALSE	1
Q8WTT2	NOC3L Nucleolar complex protein 3 homolog	NOC3L	0	1.76	2.63	0	0	1.07	FALSE	FALSE	TRUE	1
Q6P1M0	SLC27A4 Long-chain fatty acid transport protein 4	SLC27A4	2.93	1.76	1.18	2.19	0.18	0	TRUE	FALSE	FALSE	1
Q9BTC0	DIDO1 Death-inducer obliterator 1	DIDO1	3.09	1.75	1.42	0	0.3	0.24	TRUE	FALSE	FALSE	1
Q9Y6Y0	IVNS1ABP Influenza virus NS1A-binding protein	IVNS1ABP	0	1.75	2.3	0	0	0	FALSE	FALSE	TRUE	1
O00116	AGPS Alkyldihydroxyacetonephosphate synthase, peroxisom	AGPS	2.26	1.75	1.75	0	0.14	0.28	TRUE	FALSE	FALSE	1
P61803	DAD1 Dolichyl-diphosphooligosaccharide--protein glycosy	DAD1	2.29	1.75	1.35	0.18	0.42	0.04	TRUE	FALSE	FALSE	1
P51153	RAB13 Ras-related protein Rab-13	RAB13	2.74	1.74	1.48	0	0.07	0	TRUE	FALSE	FALSE	1
B0LM41	RBM14/RBM4 fusion Transcriptional coactivator CoAZ	RBM14/RBM4	2.58	1.74	1.34	0.71	0.26	0.44	TRUE	FALSE	FALSE	1
O00487	PSMD14 26S proteasome non-ATPase regulatory subunit 14	PSMD14	0	1.74	2.31	0	0.64	0	FALSE	FALSE	TRUE	1
Q8NFW8	CMAS N-acylneuraminate cytidylyltransferase	CMAS	2.78	1.73	1.66	0	0	0	TRUE	FALSE	FALSE	1
Q15006	EMC2 ER membrane protein complex subunit 2	EMC2	4.98	1.73	0	0	1.27	0	TRUE	FALSE	FALSE	1
Q9UJW0	DCTN4 Dynactin subunit 4	DCTN4	0	1.72	2	0	0.27	0.82	FALSE	FALSE	TRUE	1
Q9HDC9	APMAP Adipocyte plasma membrane-associated protein	APMAP	2.07	1.71	1.85	0	0.68	0.93	TRUE	FALSE	FALSE	1
P37802	TAGLN2 Transgelin-2	TAGLN2	2.14	1.71	1.66	0.23	0.57	0.46	TRUE	FALSE	FALSE	1
Q14444	CAPRIN1 Caprin-1	CAPRIN1	2.18	1.71	1.65	0	0.11	0.16	TRUE	FALSE	FALSE	1
Q8NI27	THOC2 THO complex subunit 2	THOC2	2.11	1.71	1.56	0.67	3.11	0.28	TRUE	FALSE	FALSE	1
Q9H9B4	SFXN1 Sideroflexin-1	SFXN1	2.04	1.71	1.41	0	0.18	0.45	TRUE	FALSE	FALSE	1
P26358	DNMT1 DNA (cytosine-5)-methyltransferase 1	DNMT1	2.07	1.71	1.27	0.27	0.27	0.35	TRUE	FALSE	FALSE	1
P29992	GNA11 Guanine nucleotide-binding protein subunit alpha-1	GNA11	0	1.7	2.63	0	0	0	FALSE	FALSE	TRUE	1
Q12765	SCRN1 Secernin-1	SCRN1	3.46	1.7	1.53	2.87	0.5	0	TRUE	FALSE	FALSE	1
Q9UHI6	DDX20 Probable ATP-dependent RNA helicase DDX20	DDX20	0	1.68	2.54	0	0	1.45	FALSE	FALSE	TRUE	1
P78406	RAE1 mRNA export factor	RAE1	2.77	1.68	1.34	1.48	0.62	0	TRUE	FALSE	FALSE	1
O60637	TSPAN3 Tetraspanin-3	TSPAN3	2.73	1.68	0	0	0	0	TRUE	FALSE	FALSE	1
P12955	PEPD Xaa-Pro dipeptidase	PEPD	2.5	1.68	0	1.07	0.25	0	TRUE	FALSE	FALSE	1
Q16630	CPSF6 Cleavage and polyadenylation specificity factor su	CPSF6	0	1.68	2.15	0	0.18	0.69	FALSE	FALSE	TRUE	1
P59998	ARPC4 Actin-related protein 2/3 complex subunit 4	ARPC4	2.13	1.67	1.47	0.25	0.49	0.12	TRUE	FALSE	FALSE	1
O94973	AP2A2 AP-2 complex subunit alpha-2	AP2A2	1.44	1.66	2.47	0.53	0.62	0	FALSE	FALSE	TRUE	1
P04062	GBA Glucosylceramidase	GBA	1.09	1.66	2.09	0	1.73	0.04	FALSE	FALSE	TRUE	1
Q10570	CPSF1 Cleavage and polyadenylation specificity factor su	CPSF1	3.95	1.64	0.92	0	0.11	0.3	TRUE	FALSE	FALSE	1
P52789	HK2 Hexokinase-2	HK2	2.06	1.64	1.66	0.87	0.6	0.38	TRUE	FALSE	FALSE	1
O60763	USO1 General vesicular transport factor p115	USO1	2.94	1.62	1.38	5.3	0.33	0.17	TRUE	FALSE	FALSE	1
P08174	CD55 Complement decay-accelerating factor	CD55	2.22	1.61	1.99	5.77	0.62	0.46	TRUE	FALSE	FALSE	1
Q9BWF3	RBM4 RNA-binding protein 4	RBM4	2.08	1.61	1.39	0	0.18	0.4	TRUE	FALSE	FALSE	1
P62873	GNB1 Guanine nucleotide-binding protein G(I)/G(S)/G(T)	GNB1	2.37	1.61	1.33	0	0.33	0.15	TRUE	FALSE	FALSE	1
Q16850	CYP51A1 Lanosterol 14-alpha demethylase	CYP51A1	2.46	1.61	0	0	0.27	0	TRUE	FALSE	FALSE	1
O96019	ACTL6A Actin-like protein 6A	ACTL6A	2.64	1.58	1.95	0.92	0.32	0.27	TRUE	FALSE	FALSE	1
Q8NCA5	FAM98A Protein FAM98A	FAM98A	0	1.58	2.06	0	1.32	0.4	FALSE	FALSE	TRUE	1
Q9Y5Q8	GTF3C5 General transcription factor 3C polypeptide 5	GTF3C5	2.09	1.58	1.82	0	0	0.1	TRUE	FALSE	FALSE	1
Q14566	MCM6 DNA replication licensing factor MCM6	MCM6	2.08	1.58	1.61	0.45	0.55	0.39	TRUE	FALSE	FALSE	1
P52815	MRPL12 39S ribosomal protein L12, mitochondrial	MRPL12	2.29	1.58	0	0.57	0.32	0	TRUE	FALSE	FALSE	1
O15294	OGT UDP-N-acetylglucosamine--peptide N-acetylglucosami	OGT	7.17	1.57	1.42	8.3	0.31	0.14	TRUE	FALSE	FALSE	1
Q12788	TBL3 Transducin beta-like protein 3	TBL3	7.77	1.56	1.73	0	1.25	0.06	TRUE	FALSE	FALSE	1
Q8TCT9	HM13 Minor histocompatibility antigen H13	HM13	2.75	1.56	1.23	1.36	0.3	0.24	TRUE	FALSE	FALSE	1
Q9UBI6	GNG12 Guanine nucleotide-binding protein G(I)/G(S)/G(O)	GNG12	8.43	1.54	1.86	9.3	0	0.21	TRUE	FALSE	FALSE	1
P57081	WDR4 tRNA (guanine-N(7)-)-methyltransferase subunit WDR	WDR4	15	1.54	1.5	0	0.89	0.25	TRUE	FALSE	FALSE	1
Q8TB61	SLC35B2 Adenosine 3-phospho 5-phosphosulfate transporter	SLC35B2	1.64	1.52	8.14	0.41	0.02	9.7	FALSE	FALSE	TRUE	1
Q16666	IFI16 Gamma-interferon-inducible protein 16	IFI16	0	1.52	3.54	0	0	1.52	FALSE	FALSE	TRUE	1
P62979	RPS27A Ubiquitin-40S ribosomal protein S27a	RPS27A	2.05	1.52	1.48	3.61	0.42	0.26	TRUE	FALSE	FALSE	1
Q9NUL3	STAU2 Double-stranded RNA-binding protein Staufen homolo	STAU2	0	1.48	2.08	0	0	0.09	FALSE	FALSE	TRUE	1
Q8N3U4	STAG2 Cohesin subunit SA-2	STAG2	2.23	1.48	1.19	0	0.69	0.26	TRUE	FALSE	FALSE	1
Q15042	RAB3GAP1 Rab3 GTPase-activating protein catalytic subunit	RAB3GAP1	6.79	1.47	1.21	0	0.11	0.18	TRUE	FALSE	FALSE	1
Q99436	PSMB7 Proteasome subunit beta type-7	PSMB7	2.24	1.47	1.27	4.89	0.53	0.18	TRUE	FALSE	FALSE	1
Q5VW32	BROX BRO1 domain-containing protein BROX	BROX	3.17	1.46	1.54	0	0.24	0.76	TRUE	FALSE	FALSE	1
P28331	NDUFS1 NADH-ubiquinone oxidoreductase 75 kDa subunit, mit	NDUFS1	3.07	1.41	0	0.84	0	0	TRUE	FALSE	FALSE	1
Q9P2B2	PTGFRN Prostaglandin F2 receptor negative regulator	PTGFRN	0	1.4	4.17	0	0.89	3.2	FALSE	FALSE	TRUE	1
Q14643	ITPR1 Inositol 1,4,5-trisphosphate receptor type 1	ITPR1	1.56	1.37	2.26	0	0.52	1.17	FALSE	FALSE	TRUE	1
P53007	SLC25A1 Tricarboxylate transport protein, mitochondrial	SLC25A1	1.48	1.31	2.27	0.75	0.88	0.95	FALSE	FALSE	TRUE	1
Q9UNE7	STUB1 E3 ubiquitin-protein ligase CHIP	STUB1	0.21	1.28	2.39	0	0	0.82	FALSE	FALSE	TRUE	1
P49753	ACOT2 Acyl-coenzyme A thioesterase 2, mitochondrial	ACOT2	2.39	1.23	1.64	0	0	0	TRUE	FALSE	FALSE	1
Q16222	UAP1 UDP-N-acetylhexosamine pyrophosphorylase	UAP1	0	1.2	2.97	0	0	0.48	FALSE	FALSE	TRUE	1
P13164	IFITM1 Interferon-induced transmembrane protein 1	IFITM1	2.16	1.2	1.17	0.14	0.13	0.41	TRUE	FALSE	FALSE	1
Q01628	IFITM3 Interferon-induced transmembrane protein 3	IFITM3	2.16	1.2	1.17	0.14	0.13	0.41	TRUE	FALSE	FALSE	1
Q01629	IFITM2 Interferon-induced transmembrane protein 2	IFITM2	2.16	1.2	1.17	0.14	0.13	0.41	TRUE	FALSE	FALSE	1
Q13330	MTA1 Metastasis-associated protein MTA1	MTA1	2.08	1.13	1.88	0.01	0.28	6.61	TRUE	FALSE	FALSE	1
O60343	TBC1D4 TBC1 domain family member 4	TBC1D4	2.02	1.12	1.61	0.14	0	0.22	TRUE	FALSE	FALSE	1
E9PSI1	TM9SF1 Transmembrane 9 superfamily member 1	TM9SF1	0	1.04	7.62	0	0	0	FALSE	FALSE	TRUE	1
P53609	PGGT1B Geranylgeranyl transferase type-1 subunit beta	PGGT1B	2.48	1.02	1.48	1.05	1.35	0.18	TRUE	FALSE	FALSE	1
Q14684	RRP1B Ribosomal RNA processing protein 1 homolog B	RRP1B	2.24	0.99	1.48	0.52	0	0.53	TRUE	FALSE	FALSE	1
Q8TAT6	NPLOC4 Nuclear protein localization protein 4 homolog	NPLOC4	2.48	0.89	1.86	0	0	0.74	TRUE	FALSE	FALSE	1
P68431	HIST1H3J Histone H3.1	HIST1H3J	2.12	0.6	1.33	1.08	0.81	0	TRUE	FALSE	FALSE	1
P84243	H3F3B Histone H3.3	H3F3B	2.12	0.6	1.33	1.08	0.81	0	TRUE	FALSE	FALSE	1
Q16695	HIST3H3 Histone H3.1t	HIST3H3	2.12	0.6	1.33	1.08	0.81	0	TRUE	FALSE	FALSE	1
Q9UGP8	SEC63 Translocation protein SEC63 homolog	SEC63	2.38	0.25	1.5	0	0	0.19	TRUE	FALSE	FALSE	1
O15066	KIF3B Kinesin-like protein KIF3B	KIF3B	0	0	15	0	0	0	FALSE	FALSE	TRUE	1
P02751	FN1 Fibronectin	FN1	0	0	15	0	0	0	FALSE	FALSE	TRUE	1
P08047	SP1 Transcription factor Sp1	SP1	0	0	15	0	0	0	FALSE	FALSE	TRUE	1
P13807	GYS1 Glycogen	GYS1	0	0	15	0	0	0	FALSE	FALSE	TRUE	1
Q7RTS1	BHLHA15 Class A basic helix-loop-helix protein 15	BHLHA15	0	0	15	0	0	0	FALSE	FALSE	TRUE	1
Q86X10	RALGAPB Ral GTPase-activating protein subunit beta	RALGAPB	0	0	15	0	0	0	FALSE	FALSE	TRUE	1
Q96PE2	ARHGEF17 Rho guanine nucleotide exchange factor 17	ARHGEF17	0	0	15	0	0	0	FALSE	FALSE	TRUE	1
Q9H082	RAB33B Ras-related protein Rab-33B	RAB33B	0	0	15	0	0	0	FALSE	FALSE	TRUE	1
Q9H6U8	ALG9 Alpha-1,2-mannosyltransferase ALG9	ALG9	0	0	15	0	0	0	FALSE	FALSE	TRUE	1
Q9P2K8	EIF2AK4 Eukaryotic translation initiation factor 2-alpha k	EIF2AK4	0	0	15	0	0	0	FALSE	FALSE	TRUE	1
Q9UK59	DBR1 Lariat debranching enzyme	DBR1	0	0	15	0	0	0	FALSE	FALSE	TRUE	1
Q9UKM7	MAN1B1 Endoplasmic reticulum mannosyl-oligosaccharide 1,2	MAN1B1	0	0	15	0	0	0	FALSE	FALSE	TRUE	1
Reverse_P53420	COL4A4 Collagen alpha-4(IV) chain	COL4A4	0	0	15	0	0	0	FALSE	FALSE	TRUE	1
Reverse_Q8TCG5	CPT1C Carnitine O-palmitoyltransferase 1, brain isoform	CPT1C	0	0	15	0	0	0	FALSE	FALSE	TRUE	1
Reverse_Q9UPS8	ANKRD26 Ankyrin repeat domain-containing protein 26	ANKRD26	0	0	15	0	0	0	FALSE	FALSE	TRUE	1
O95613	PCNT Pericentrin	PCNT	0	0	11.55	0	0	0	FALSE	FALSE	TRUE	1
Q9P287	BCCIP BRCA2 and CDKN1A-interacting protein	BCCIP	0	0	10.04	0	0	7.01	FALSE	FALSE	TRUE	1
Q9BUL8	PDCD10 Programmed cell death protein 10	PDCD10	0	0	9.57	0	0	7.68	FALSE	FALSE	TRUE	1
P30519	HMOX2 Heme oxygenase 2	HMOX2	0	0	8.53	0	0	7.32	FALSE	FALSE	TRUE	1
O95251	KAT7 Histone acetyltransferase KAT7	KAT7	0	0	8.26	0	0	0	FALSE	FALSE	TRUE	1
Q14694	USP10 Ubiquitin carboxyl-terminal hydrolase 10	USP10	0	0	8.23	0	0	8.1	FALSE	FALSE	TRUE	1
Q96J01	THOC3 THO complex subunit 3	THOC3	0	0	8.2	0	0	9.62	FALSE	FALSE	TRUE	1
O00635	TRIM38 Tripartite motif-containing protein 38	TRIM38	0	0	8.18	0	0	9.64	FALSE	FALSE	TRUE	1
Q9NZQ3	NCKIPSD NCK-interacting protein with SH3 domain	NCKIPSD	0	0	8.12	0	0	9.72	FALSE	FALSE	TRUE	1
Q9P0N9	TBC1D7 TBC1 domain family member 7	TBC1D7	0	0	8.07	0	0	9.8	FALSE	FALSE	TRUE	1
Q969V3	NCLN Nicalin	NCLN	1.22	0	7.21	0.28	0	8.51	FALSE	FALSE	TRUE	1
Reverse_O95613	PCNT Pericentrin	PCNT	0	0	6.95	0	0	6.39	FALSE	FALSE	TRUE	1
Q53SF7	COBLL1 Cordon-bleu protein-like 1	COBLL1	0	0	6.66	0	0	0	FALSE	FALSE	TRUE	1
Q9NVE7	PANK4 Pantothenate kinase 4	PANK4	1.62	0	5.38	0	0	5.24	FALSE	FALSE	TRUE	1
Q9H5V8	CDCP1 CUB domain-containing protein 1	CDCP1	0	0	5	0	0	3.64	FALSE	FALSE	TRUE	1
Q9GZS1	POLR1E DNA-directed RNA polymerase I subunit RPA49	POLR1E	0	0	4.43	0	0	3.57	FALSE	FALSE	TRUE	1
Q96CS3	FAF2 FAS-associated factor 2	FAF2	0	0	4.37	0	0	3.86	FALSE	FALSE	TRUE	1
Q8N392	ARHGAP18 Rho GTPase-activating protein 18	ARHGAP18	0	0	4.32	0	0	0	FALSE	FALSE	TRUE	1
Q9UFC0	LRWD1 Leucine-rich repeat and WD repeat-containing prote	LRWD1	1.94	0	4.31	0.61	0	0	FALSE	FALSE	TRUE	1
P50748	KNTC1 Kinetochore-associated protein 1	KNTC1	0	0	4.27	0	0	0	FALSE	FALSE	TRUE	1
O60784	TOM1 Target of Myb protein 1	TOM1	0	0	4.15	0	0	0	FALSE	FALSE	TRUE	1
O43670	ZNF207 Zinc finger protein 207	ZNF207	0	0	4.11	0	0	3.19	FALSE	FALSE	TRUE	1
Q9UNN5	FAF1 FAS-associated factor 1	FAF1	0	0	3.66	0	0	2.57	FALSE	FALSE	TRUE	1
Q9BTE7	DCUN1D5 DCN1-like protein 5	DCUN1D5	0	0	3.65	0	0	0	FALSE	FALSE	TRUE	1
Q5T0F9	CC2D1B Coiled-coil and C2 domain-containing protein 1B	CC2D1B	0	0	3.6	0	0	0	FALSE	FALSE	TRUE	1
Q9UN37	VPS4A Vacuolar protein sorting-associated protein 4A	VPS4A	0	0	3.51	0	0	1.82	FALSE	FALSE	TRUE	1
Q96J02	ITCH E3 ubiquitin-protein ligase Itchy homolog	ITCH	0	0	3.49	0	0	0	FALSE	FALSE	TRUE	1
Q9UPT5	EXOC7 Exocyst complex component 7	EXOC7	0	0	3.44	0	0	0	FALSE	FALSE	TRUE	1
Q13637	RAB32 Ras-related protein Rab-32	RAB32	0	0	3.42	0	0	0	FALSE	FALSE	TRUE	1
O94760	DDAH1 N(G),N(G)-dimethylarginine dimethylaminohydrolase	DDAH1	0	0	3.41	0	0	1.68	FALSE	FALSE	TRUE	1
Q9NZL9	MAT2B Methionine adenosyltransferase 2 subunit beta	MAT2B	0	0	3.37	0	0	0	FALSE	FALSE	TRUE	1
P00568	AK1 Adenylate kinase isoenzyme 1	AK1	0	0	3.36	0	0	1.22	FALSE	FALSE	TRUE	1
Q92625	ANKS1A Ankyrin repeat and SAM domain-containing protein 1	ANKS1A	0	0	3.36	0	0	1.51	FALSE	FALSE	TRUE	1
Q6P1N9	TATDN1 Putative deoxyribonuclease TATDN1	TATDN1	0	0	3.24	0	0	1	FALSE	FALSE	TRUE	1
Q92614	MYO18A Unconventional myosin-XVIIIa	MYO18A	0	0	3.22	0	0	0	FALSE	FALSE	TRUE	1
P60983	GMFB Glia maturation factor beta	GMFB	0	0	3.17	0	0	0	FALSE	FALSE	TRUE	1
P55263	ADK Adenosine kinase	ADK	0	0	3.14	0	0	0	FALSE	FALSE	TRUE	1
Q12824	SMARCB1 SWI/SNF-related matrix-associated actin-dependent	SMARCB1	0	0	3.13	0	0	0	FALSE	FALSE	TRUE	1
O75934	BCAS2 Pre-mRNA-splicing factor SPF27	BCAS2	0	0	3.1	0	0	0	FALSE	FALSE	TRUE	1
Q03013	GSTM4 Glutathione S-transferase Mu 4	GSTM4	0	0	3.08	0	0	1.55	FALSE	FALSE	TRUE	1
Q5JRA6	MIA3 Melanoma inhibitory activity protein 3	MIA3	0	0	3.05	0	0	0	FALSE	FALSE	TRUE	1
P55290	CDH13 Cadherin-13	CDH13	0	0	3.02	0	0	0	FALSE	FALSE	TRUE	1
Q9NVM6	DNAJC17 DnaJ homolog subfamily C member 17	DNAJC17	0	0	3.02	0	0	0	FALSE	FALSE	TRUE	1
O94875	SORBS2 Sorbin and SH3 domain-containing protein 2	SORBS2	0	0	3	0	0	0	FALSE	FALSE	TRUE	1
Q8IWX8	CHERP Calcium homeostasis endoplasmic reticulum protein	CHERP	0	0	2.99	0	0	0	FALSE	FALSE	TRUE	1
O95400	CD2BP2 CD2 antigen cytoplasmic tail-binding protein 2	CD2BP2	0	0	2.96	0	0	1.36	FALSE	FALSE	TRUE	1
Q9Y6N5	SQRDL Sulfide:quinone oxidoreductase, mitochondrial	SQRDL	0	0	2.96	0	0	1.66	FALSE	FALSE	TRUE	1
O96006	ZBED1 Zinc finger BED domain-containing protein 1	ZBED1	0	0	2.95	0	0	0	FALSE	FALSE	TRUE	1
Q8WWH5	TRUB1 Probable tRNA pseudouridine synthase 1	TRUB1	0	0	2.88	0	0	0	FALSE	FALSE	TRUE	1
P11182	DBT Lipoamide acyltransferase component of branched-ch	DBT	0	0	2.86	0	0	0	FALSE	FALSE	TRUE	1
Q96FV9	THOC1 THO complex subunit 1	THOC1	0	0	2.86	0	0	0	FALSE	FALSE	TRUE	1
Q9Y496	KIF3A Kinesin-like protein KIF3A	KIF3A	0	0	2.84	0	0	0.53	FALSE	FALSE	TRUE	1
P07951	TPM2 Tropomyosin beta chain	TPM2	0	0	2.79	0	0	1.05	FALSE	FALSE	TRUE	1
P19174	PLCG1 1-phosphatidylinositol 4,5-bisphosphate phosphodie	PLCG1	0	0	2.79	0	0	1.52	FALSE	FALSE	TRUE	1
Q92785	DPF2 Zinc finger protein ubi-d4	DPF2	0	0	2.78	0	0	0	FALSE	FALSE	TRUE	1
Q9UHR4	BAIAP2L1 Brain-specific angiogenesis inhibitor 1-associated	BAIAP2L1	0	0	2.76	0	0	1.64	FALSE	FALSE	TRUE	1
Q92696	RABGGTA Geranylgeranyl transferase type-2 subunit alpha	RABGGTA	0	0	2.71	0	0	0	FALSE	FALSE	TRUE	1
Q9UJC3	HOOK1 Protein Hook homolog 1	HOOK1	0	0	2.7	0	0	0.24	FALSE	FALSE	TRUE	1
Q13206	DDX10 Probable ATP-dependent RNA helicase DDX10	DDX10	0	0	2.7	0	0	1.61	FALSE	FALSE	TRUE	1
P23497	SP100 Nuclear autoantigen Sp-100	SP100	0	0	2.69	0	0	0.65	FALSE	FALSE	TRUE	1
P10586	PTPRF Receptor-type tyrosine-protein phosphatase F	PTPRF	0	0	2.67	0	0	1.37	FALSE	FALSE	TRUE	1
Q92541	RTF1 RNA polymerase-associated protein RTF1 homolog	RTF1	0	0	2.67	0	0	5.12	FALSE	FALSE	TRUE	1
Q5JPH6	EARS2 Probable glutamate--tRNA ligase, mitochondrial	EARS2	0	0	2.66	0	0	0	FALSE	FALSE	TRUE	1
Q96CT7	CCDC124 Coiled-coil domain-containing protein 124	CCDC124	0	0	2.63	0	0	1.22	FALSE	FALSE	TRUE	1
F8WBW8	BAHCC1 BAH and coiled-coil domain-containing protein 1	BAHCC1	0	0	2.59	0	0	0	FALSE	FALSE	TRUE	1
Q96I25	RBM17 Splicing factor 45	RBM17	0	0	2.59	0	0	0	FALSE	FALSE	TRUE	1
Q9NS86	LANCL2 LanC-like protein 2	LANCL2	1.95	0	2.56	0	0	1.17	FALSE	FALSE	TRUE	1
A3KN83	SBNO1 Protein strawberry notch homolog 1	SBNO1	0	0	2.56	0	0	0	FALSE	FALSE	TRUE	1
Q9NUQ8	ABCF3 ATP-binding cassette sub-family F member 3	ABCF3	0	0	2.54	0	0	0	FALSE	FALSE	TRUE	1
P07311	ACYP1 Acylphosphatase-1	ACYP1	0	0	2.54	0	0	0.32	FALSE	FALSE	TRUE	1
O00743	PPP6C Serine/threonine-protein phosphatase 6 catalytic s	PPP6C	3.46	0	1.96	0	0	0.97	TRUE	FALSE	FALSE	1
P54727	RAD23B UV excision repair protein RAD23 homolog B	RAD23B	3.65	0	1.82	1.34	0	0	TRUE	FALSE	FALSE	1
O15511	ARPC5 Actin-related protein 2/3 complex subunit 5	ARPC5	2.92	0	1.82	0	0	0.52	TRUE	FALSE	FALSE	1
P51116	FXR2 Fragile X mental retardation syndrome-related prot	FXR2	2.65	0	1.79	0	0	0.06	TRUE	FALSE	FALSE	1
O43432	EIF4G3 Eukaryotic translation initiation factor 4 gamma 3	EIF4G3	2.67	0	1.66	0	0	0.52	TRUE	FALSE	FALSE	1
Q02880	TOP2B DNA topoisomerase 2-beta	TOP2B	11.57	0	1.65	0	0	0.19	TRUE	FALSE	FALSE	1
P49903	SEPHS1 Selenide, water dikinase 1	SEPHS1	2.86	0	1.64	0	0	0	TRUE	FALSE	FALSE	1
P09001	MRPL3 39S ribosomal protein L3, mitochondrial	MRPL3	8.61	0	1.59	9.04	0	7.75	TRUE	FALSE	FALSE	1
P46100	ATRX Transcriptional regulator ATRX	ATRX	2.52	0	1.51	2.08	0	0	TRUE	FALSE	FALSE	1
Q96DH6	MSI2 RNA-binding protein Musashi homolog 2	MSI2	15	0	1.49	0	0	0.01	TRUE	FALSE	FALSE	1
O43290	SART1 U4/U6.U5 tri-snRNP-associated protein 1	SART1	7.54	0	1.38	0	0	1.04	TRUE	FALSE	FALSE	1
Q8IWE2	FAM114A1 Protein NOXP20	FAM114A1	4.3	0	1.15	4.6	0	0.11	TRUE	FALSE	FALSE	1
Q8TEM1	NUP210 Nuclear pore membrane glycoprotein 210	NUP210	2.65	0	1.06	0	0	0.46	TRUE	FALSE	FALSE	1
O00186	STXBP3 Syntaxin-binding protein 3	STXBP3	7.84	0	0.98	10.13	0	0	TRUE	FALSE	FALSE	1
P35250	RFC2 Replication factor C subunit 2	RFC2	15	0	0	0	0	0	TRUE	FALSE	FALSE	1
P51608	MECP2 Methyl-CpG-binding protein 2	MECP2	15	0	0	0	0	0	TRUE	FALSE	FALSE	1
Q12923	PTPN13 Tyrosine-protein phosphatase non-receptor type 13	PTPN13	15	0	0	0	0	0	TRUE	FALSE	FALSE	1
Q16270	IGFBP7 Insulin-like growth factor-binding protein 7	IGFBP7	15	0	0	0	0	0	TRUE	FALSE	FALSE	1
Q86UK7	ZNF598 Zinc finger protein 598	ZNF598	15	0	0	0	0	0	TRUE	FALSE	FALSE	1
Q8WZ27	Uncharacterized protein	Uncharacterized	15	0	0	0	0	0	TRUE	FALSE	FALSE	1
Q9UDV7	ZNF282 Zinc finger protein 282	ZNF282	15	0	0	0	0	0	TRUE	FALSE	FALSE	1
Reverse_A1L443	FAM22F Protein FAM22F	FAM22F	15	0	0	0	0	0	TRUE	FALSE	FALSE	1
Reverse_Q499Z4	ZNF672 Zinc finger protein 672	ZNF672	15	0	0	0	0	0	TRUE	FALSE	FALSE	1
Reverse_Q5CZC0	FSIP2 Fibrous sheath-interacting protein 2	FSIP2	15	0	0	0	0	0	TRUE	FALSE	FALSE	1
Reverse_Q9NQC1	PHF15 Protein Jade-2	PHF15	15	0	0	0	0	0	TRUE	FALSE	FALSE	1
P05771	PRKCB Protein kinase C beta type	PRKCB	13.86	0	0	0	0	0	TRUE	FALSE	FALSE	1
Q86W42	THOC6 THO complex subunit 6 homolog	THOC6	10.74	0	0	0	0	0	TRUE	FALSE	FALSE	1
P42356	PI4KA Phosphatidylinositol 4-kinase alpha	PI4KA	10.7	0	0	0	0	0	TRUE	FALSE	FALSE	1
Q70E73	RAPH1 Ras-associated and pleckstrin homology domains-con	RAPH1	9.17	0	0	0	0	0	TRUE	FALSE	FALSE	1
Q13404	UBE2V1 Ubiquitin-conjugating enzyme E2 variant 1	UBE2V1	8.72	0	0	8.87	0	0	TRUE	FALSE	FALSE	1
Reverse_O95996	APC2 Adenomatous polyposis coli protein 2	APC2	8.5	0	0	9.19	0	0	TRUE	FALSE	FALSE	1
Q92575	UBXN4 UBX domain-containing protein 4	UBXN4	7.72	0	0	0	0	0	TRUE	FALSE	FALSE	1
Q0ZGT2	NEXN Nexilin	NEXN	6.66	0	0	0	0	0	TRUE	FALSE	FALSE	1
Q9UBS4	DNAJB11 DnaJ homolog subfamily B member 11	DNAJB11	5.38	0	0	6.13	0	0	TRUE	FALSE	FALSE	1
Reverse_Q8WZ42	TTN Titin	TTN	5.31	0	0	0	0	0	TRUE	FALSE	FALSE	1
O15446	CD3EAP DNA-directed RNA polymerase I subunit RPA34	CD3EAP	5.08	0	0	4.96	0	0	TRUE	FALSE	FALSE	1
Q5JXB2	UBE2NL Putative ubiquitin-conjugating enzyme E2 N-like	UBE2NL	4.1	0	0	0	0	0	TRUE	FALSE	FALSE	1
P20929	NEB Nebulin	NEB	4.08	0	0	0	0	0	TRUE	FALSE	FALSE	1
O75044	SRGAP2 SLIT-ROBO Rho GTPase-activating protein 2	SRGAP2	3.95	0	0	0	0	0	TRUE	FALSE	FALSE	1
P29218	IMPA1 Inositol monophosphatase 1	IMPA1	3.85	0	0	0	0	0	TRUE	FALSE	FALSE	1
F2Z2F3	Uncharacterized protein	Uncharacterized	3.68	0	0	0	0	0	TRUE	FALSE	FALSE	1
Q15813	TBCE Tubulin-specific chaperone E	TBCE	3.25	0	0	0.18	0	0	TRUE	FALSE	FALSE	1
P50579	METAP2 Methionine aminopeptidase 2	METAP2	3.14	0	0	0	0	0	TRUE	FALSE	FALSE	1
P27361	MAPK3 Mitogen-activated protein kinase 3	MAPK3	2.96	0	0	0	0	0	TRUE	FALSE	FALSE	1
Reverse_Q9Y4R7	TTLL3 Tubulin monoglycylase TTLL3	TTLL3	2.93	0	0	0	0	0	TRUE	FALSE	FALSE	1
Q9NRL3	STRN4 Striatin-4	STRN4	2.84	0	0	0	0	0	TRUE	FALSE	FALSE	1
Q8TDD1	DDX54 ATP-dependent RNA helicase DDX54	DDX54	2.72	0	0	0	0	0	TRUE	FALSE	FALSE	1
O14556	GAPDHS Glyceraldehyde-3-phosphate dehydrogenase, testis-s	GAPDHS	2.57	0	0	0.51	0	0	TRUE	FALSE	FALSE	1
P21359	NF1 Neurofibromin	NF1	0	0	2.48	0	0	1.16	FALSE	FALSE	TRUE	1
O15258	RER1 Protein RER1	RER1	0	0	2.47	0	0	0	FALSE	FALSE	TRUE	1
Q96EK5	KIAA1279 KIF1-binding protein	KIAA1279	0	0	2.44	0	0	0.31	FALSE	FALSE	TRUE	1
O95263	PDE8B High affinity cAMP-specific and IBMX-insensitive 3	PDE8B	0	0	2.43	0	0	0	FALSE	FALSE	TRUE	1
Q92817	EVPL Envoplakin	EVPL	0	0	2.43	0	0	0.11	FALSE	FALSE	TRUE	1
Q9P2N5	RBM27 RNA-binding protein 27	RBM27	0	0	2.42	0	0	0.05	FALSE	FALSE	TRUE	1
Q6K0P9	PYHIN1 Pyrin and HIN domain-containing protein 1	PYHIN1	0	0	2.41	0	0	1.94	FALSE	FALSE	TRUE	1
Q9Y5X1	SNX9 Sorting nexin-9	SNX9	0	0	2.39	0	0	0.47	FALSE	FALSE	TRUE	1
Q3MHD2	LSM12 Protein LSM12 homolog	LSM12	0	0	2.38	0	0	0.54	FALSE	FALSE	TRUE	1
P51858	HDGF Hepatoma-derived growth factor	HDGF	0	0	2.38	0	0	0.69	FALSE	FALSE	TRUE	1
Q9H501	ESF1 ESF1 homolog	ESF1	0	0	2.35	0	0	0	FALSE	FALSE	TRUE	1
Q8WXE1	ATRIP ATR-interacting protein	ATRIP	0	0	2.32	0	0	0	FALSE	FALSE	TRUE	1
Q9C0J8	WDR33 pre-mRNA 3 end processing protein WDR33	WDR33	0	0	2.32	0	0	0	FALSE	FALSE	TRUE	1
Q99447	PCYT2 Ethanolamine-phosphate cytidylyltransferase	PCYT2	1.99	0	2.31	0.82	0	0.48	FALSE	FALSE	TRUE	1
O75351	VPS4B Vacuolar protein sorting-associated protein 4B	VPS4B	0	0	2.31	0	0	0.21	FALSE	FALSE	TRUE	1
P41743	PRKCI Protein kinase C iota type	PRKCI	0	0	2.31	0	0	0.42	FALSE	FALSE	TRUE	1
Q5T1M5	FKBP15 FK506-binding protein 15	FKBP15	0	0	2.29	0	0	7.44	FALSE	FALSE	TRUE	1
Q9NRY4	ARHGAP35 Rho GTPase-activating protein 35	ARHGAP35	0	0	2.28	0	0	0	FALSE	FALSE	TRUE	1
P50552	VASP Vasodilator-stimulated phosphoprotein	VASP	0	0	2.28	0	0	0.37	FALSE	FALSE	TRUE	1
Q9NXR7	BRE BRCA1-A complex subunit BRE	BRE	0	0	2.25	0	0	0	FALSE	FALSE	TRUE	1
O15381	NVL Nuclear valosin-containing protein-like	NVL	0	0	2.24	0	0	0	FALSE	FALSE	TRUE	1
Q14790	CASP8 Caspase-8	CASP8	0	0	2.23	0	0	0	FALSE	FALSE	TRUE	1
Q8N335	GPD1L Glycerol-3-phosphate dehydrogenase 1-like protein	GPD1L	0	0	2.22	0	0	0	FALSE	FALSE	TRUE	1
Q9H078	CLPB Caseinolytic peptidase B protein homolog	CLPB	0	0	2.22	0	0	0	FALSE	FALSE	TRUE	1
Q9H8H3	METTL7A Methyltransferase-like protein 7A	METTL7A	1.21	0	2.21	0	0	1.31	FALSE	FALSE	TRUE	1
Q9NUQ6	SPATS2L SPATS2-like protein	SPATS2L	0	0	2.21	0	0	0.83	FALSE	FALSE	TRUE	1
C9JRZ8	AKR1B15 Aldo-keto reductase family 1 member B15	AKR1B15	0	0	2.2	0	0	0	FALSE	FALSE	TRUE	1
P51151	RAB9A Ras-related protein Rab-9A	RAB9A	0	0	2.19	0	0	0	FALSE	FALSE	TRUE	1
Q7L9L4	MOB1B MOB kinase activator 1B	MOB1B	0	0	2.19	0	0	0.18	FALSE	FALSE	TRUE	1
Q9H8S9	MOB1A MOB kinase activator 1A	MOB1A	0	0	2.19	0	0	0.18	FALSE	FALSE	TRUE	1
P48556	PSMD8 26S proteasome non-ATPase regulatory subunit 8	PSMD8	0	0	2.19	0	0	0.45	FALSE	FALSE	TRUE	1
O00178	GTPBP1 GTP-binding protein 1	GTPBP1	0	0	2.19	0	0	0.56	FALSE	FALSE	TRUE	1
Q12959	DLG1 Disks large homolog 1	DLG1	0	0	2.15	0	0	0.37	FALSE	FALSE	TRUE	1
P02511	CRYAB Alpha-crystallin B chain	CRYAB	0	0	2.14	0	0	0	FALSE	FALSE	TRUE	1
P53365	ARFIP2 Arfaptin-2	ARFIP2	0	0	2.13	0	0	0	FALSE	FALSE	TRUE	1
H3BQZ7	Uncharacterized protein	Uncharacterized	0	0	2.13	0	0	3.22	FALSE	FALSE	TRUE	1
O60934	NBN Nibrin	NBN	0	0	2.12	0	0	1.12	FALSE	FALSE	TRUE	1
P23786	CPT2 Carnitine O-palmitoyltransferase 2, mitochondrial	CPT2	0	0	2.11	0	0	0	FALSE	FALSE	TRUE	1
Q15398	DLGAP5 Disks large-associated protein 5	DLGAP5	0	0	2.11	0	0	0	FALSE	FALSE	TRUE	1
Q92783	STAM Signal transducing adapter molecule 1	STAM	0	0	2.11	0	0	0	FALSE	FALSE	TRUE	1
Q3V6T2	CCDC88A Girdin	CCDC88A	0	0	2.1	0	0	0	FALSE	FALSE	TRUE	1
Q658Y4	FAM91A1 Protein FAM91A1	FAM91A1	0	0	2.08	0	0	0	FALSE	FALSE	TRUE	1
Q969X6	CIRH1A Cirhin	CIRH1A	0	0	2.08	0	0	0	FALSE	FALSE	TRUE	1
Q9BV44	THUMPD3 THUMP domain-containing protein 3	THUMPD3	0	0	2.08	0	0	0.1	FALSE	FALSE	TRUE	1
Q9UNZ2	NSFL1C NSFL1 cofactor p47	NSFL1C	0	0	2.06	0	0	0	FALSE	FALSE	TRUE	1
O00505	KPNA3 Importin subunit alpha-3	KPNA3	0	0	2.05	0	0	0	FALSE	FALSE	TRUE	1
Q8N999	C12orf29 Uncharacterized protein C12orf29	C12orf29	0	0	2.04	0	0	0	FALSE	FALSE	TRUE	1
O60524	NEMF Nuclear export mediator factor NEMF	NEMF	0	0	2.04	0	0	0.66	FALSE	FALSE	TRUE	1
Q7KZI7	MARK2 Serine/threonine-protein kinase MARK2	MARK2	0	0	2.02	0	0	0	FALSE	FALSE	TRUE	1
P16070	CD44 CD44 antigen	CD44	0	0	2.02	0	0	0.39	FALSE	FALSE	TRUE	1
Q9NZL4	HSPBP1 Hsp70-binding protein 1	HSPBP1	0	0	2.01	0	0	0	FALSE	FALSE	TRUE	1
Q9P016	THYN1 Thymocyte nuclear protein 1	THYN1	0	0	2	0	0	1.26	FALSE	FALSE	TRUE	1
O60884	DNAJA2 DnaJ homolog subfamily A member 2	DNAJA2	2.45	0	1.95	0	0	0.57	TRUE	FALSE	FALSE	1
Q9BTC8	MTA3 Metastasis-associated protein MTA3	MTA3	2.07	0	1.8	0.16	0	0.22	TRUE	FALSE	FALSE	1
Q9BSH4	TACO1 Translational activator of cytochrome c oxidase 1	TACO1	2.38	0	1.76	0.86	0	0	TRUE	FALSE	FALSE	1
Q9Y5J1	UTP18 U3 small nucleolar RNA-associated protein 18 homol	UTP18	2.01	0	1.76	0	0	0	TRUE	FALSE	FALSE	1
O95292	VAPB Vesicle-associated membrane protein-associated pro	VAPB	2.36	0	1.75	0	0	0	TRUE	FALSE	FALSE	1
P50750	CDK9 Cyclin-dependent kinase 9	CDK9	2.01	0	1.7	0.17	0	0.33	TRUE	FALSE	FALSE	1
Q9NWH9	SLTM SAFB-like transcription modulator	SLTM	2.05	0	1.61	0	0	0	TRUE	FALSE	FALSE	1
Q13443	ADAM9 Disintegrin and metalloproteinase domain-containin	ADAM9	2.01	0	1.46	0	0	0.38	TRUE	FALSE	FALSE	1
Q9NW64	RBM22 Pre-mRNA-splicing factor RBM22	RBM22	2.17	0	1.45	0	0	0	TRUE	FALSE	FALSE	1
Q9Y5A9	YTHDF2 YTH domain family protein 2	YTHDF2	2.39	0	1.44	0	0	0.16	TRUE	FALSE	FALSE	1
Q9NU22	MDN1 Midasin	MDN1	2.19	0	1.32	0.92	0	0.14	TRUE	FALSE	FALSE	1
Q4G0J3	LARP7 La-related protein 7	LARP7	2.1	0	1.23	1.15	0	0	TRUE	FALSE	FALSE	1
O43399	TPD52L2 Tumor protein D54	TPD52L2	2.26	0	1.19	0.46	0	0	TRUE	FALSE	FALSE	1
Q5HYI8	RABL3 Rab-like protein 3	RABL3	2.33	0	1.1	0	0	0.02	TRUE	FALSE	FALSE	1
Q9UQ35	SRRM2 Serine/arginine repetitive matrix protein 2	SRRM2	2.04	0	1.02	0.54	0	0.2	TRUE	FALSE	FALSE	1
Q9Y5P6	GMPPB Mannose-1-phosphate guanyltransferase beta	GMPPB	2.48	0	0	0	0	0	TRUE	FALSE	FALSE	1
Q7Z406	MYH14 Myosin-14	MYH14	2.42	0	0	0.4	0	0	TRUE	FALSE	FALSE	1
Q15428	SF3A2 Splicing factor 3A subunit 2	SF3A2	2.42	0	0	2.88	0	0	TRUE	FALSE	FALSE	1
Q9NP61	ARFGAP3 ADP-ribosylation factor GTPase-activating protein	ARFGAP3	2.37	0	0	0	0	0	TRUE	FALSE	FALSE	1
Q15287	RNPS1 RNA-binding protein with serine-rich domain 1	RNPS1	2.33	0	0	0	0	0	TRUE	FALSE	FALSE	1
Q9NX24	NHP2 H/ACA ribonucleoprotein complex subunit 2	NHP2	2.31	0	0	0	0	0	TRUE	FALSE	FALSE	1
Q8TED1	GPX8 Probable glutathione peroxidase 8	GPX8	2.29	0	0	0	0	0	TRUE	FALSE	FALSE	1
O75616	ERAL1 GTPase Era, mitochondrial	ERAL1	2.28	0	0	0	0	0	TRUE	FALSE	FALSE	1
Q9NWU1	OXSM 3-oxoacyl-	OXSM	2.27	0	0	0	0	0	TRUE	FALSE	FALSE	1
Q14181	POLA2 DNA polymerase alpha subunit B	POLA2	2.25	0	0	0	0	0	TRUE	FALSE	FALSE	1
P49902	NT5C2 Cytosolic purine 5-nucleotidase	NT5C2	2.25	0	0	0.35	0	0	TRUE	FALSE	FALSE	1
P60468	SEC61B Protein transport protein Sec61 subunit beta	SEC61B	2.22	0	0	0	0	0	TRUE	FALSE	FALSE	1
Q9H1Z4	WDR13 WD repeat-containing protein 13	WDR13	2.18	0	0	0	0	0	TRUE	FALSE	FALSE	1
Q8NBK3	SUMF1 Sulfatase-modifying factor 1	SUMF1	2.15	0	0	0	0	0	TRUE	FALSE	FALSE	1
O60831	PRAF2 PRA1 family protein 2	PRAF2	2.11	0	0	0	0	0	TRUE	FALSE	FALSE	1
Reverse_A6QL64	ANKRD36 Ankyrin repeat domain-containing protein 36A	ANKRD36	2.03	0	0	0	0	0	TRUE	FALSE	FALSE	1
Reverse_Q5JPF3	ANKRD36C Ankyrin repeat domain-containing protein 36C	ANKRD36C	2.03	0	0	0	0	0	TRUE	FALSE	FALSE	1
P30408	TM4SF1 Transmembrane 4 L6 family member 1	TM4SF1	2.02	0	0	0.34	0	0	TRUE	FALSE	FALSE	1
Q9HC07	TMEM165 Transmembrane protein 165	TMEM165	2.01	0	0	0	0	0	TRUE	FALSE	FALSE	1
H0Y626	Uncharacterized protein	Uncharacterized	2	0	0	0	0	0	TRUE	FALSE	FALSE	1
Q96I24	FUBP3 Far upstream element-binding protein 3	FUBP3	0	1.99	1.48	0	0	0	FALSE	FALSE	FALSE	0
Q00341	HDLBP Vigilin	HDLBP	1.63	1.99	1.41	0.24	0.45	0.23	FALSE	FALSE	FALSE	0
O75608	LYPLA1 Acyl-protein thioesterase 1	LYPLA1	1.88	1.99	0	0.11	0	0	FALSE	FALSE	FALSE	0
Q15005	SPCS2 Signal peptidase complex subunit 2	SPCS2	0	1.99	0	0	0	0	FALSE	FALSE	FALSE	0
P32004	L1CAM Neural cell adhesion molecule L1	L1CAM	0	1.98	1.77	0	0.02	0.39	FALSE	FALSE	FALSE	0
Q15942	ZYX Zyxin	ZYX	1.69	1.98	1.72	0.06	0.24	0.37	FALSE	FALSE	FALSE	0
Q13151	HNRNPA0 Heterogeneous nuclear ribonucleoprotein A0	HNRNPA0	1.93	1.98	1.66	0.26	0.14	0.44	FALSE	FALSE	FALSE	0
P67775	PPP2CA Serine/threonine-protein phosphatase 2A catalytic	PPP2CA	1.98	1.98	1.5	0	0.51	0.18	FALSE	FALSE	FALSE	0
Q99570	PIK3R4 Phosphoinositide 3-kinase regulatory subunit 4	PIK3R4	0	1.98	1.39	0	0	0.17	FALSE	FALSE	FALSE	0
Q9HAV4	XPO5 Exportin-5	XPO5	1.98	1.98	1.32	0	0.47	0.48	FALSE	FALSE	FALSE	0
G3V325	PTCD1 Pentatricopeptide repeat-containing protein 1	PTCD1	0	1.98	0	0	0	0	FALSE	FALSE	FALSE	0
Q16181	SEPT7 Septin-7	2017-09-07	1.98	1.97	1.79	0.52	0.22	0.17	FALSE	FALSE	FALSE	0
P21108	PRPS1L1 Ribose-phosphate pyrophosphokinase 3	PRPS1L1	0	1.97	1.67	0	0.3	0	FALSE	FALSE	FALSE	0
P09884	POLA1 DNA polymerase alpha catalytic subunit	POLA1	1.97	1.97	1.55	0	0.67	0.34	FALSE	FALSE	FALSE	0
Q14CX7	NAA25 N-alpha-acetyltransferase 25, NatB auxiliary subun	NAA25	0	1.97	1.48	0	0	0.62	FALSE	FALSE	FALSE	0
Q5JVF3	PCID2 PCI domain-containing protein 2	PCID2	1.96	1.97	1.45	0.66	0.34	0.23	FALSE	FALSE	FALSE	0
O75592	MYCBP2 Probable E3 ubiquitin-protein ligase MYCBP2	MYCBP2	0	1.97	1.44	0	0.24	0	FALSE	FALSE	FALSE	0
Q92667	AKAP1 A-kinase anchor protein 1, mitochondrial	AKAP1	0	1.97	1.39	0	0	0	FALSE	FALSE	FALSE	0
Q92896	GLG1 Golgi apparatus protein 1	GLG1	0	1.97	1.23	0	0	0.37	FALSE	FALSE	FALSE	0
Q14185	DOCK1 Dedicator of cytokinesis protein 1	DOCK1	0	1.97	0	0	0	0	FALSE	FALSE	FALSE	0
Q8WXH0	SYNE2 Nesprin-2	SYNE2	0	1.97	0	0	0	0	FALSE	FALSE	FALSE	0
Q96A65	EXOC4 Exocyst complex component 4	EXOC4	1.76	1.96	1.86	0.41	0.16	0.29	FALSE	FALSE	FALSE	0
Q99460	PSMD1 26S proteasome non-ATPase regulatory subunit 1	PSMD1	1.92	1.96	1.6	0.61	0.61	0.46	FALSE	FALSE	FALSE	0
P42704	LRPPRC Leucine-rich PPR motif-containing protein, mitocho	LRPPRC	1.76	1.96	1.5	0.31	2.22	0.37	FALSE	FALSE	FALSE	0
P40763	STAT3 Signal transducer and activator of transcription 3	STAT3	1.44	1.96	1.34	0.28	1	0.38	FALSE	FALSE	FALSE	0
Q9Y314	NOSIP Nitric oxide synthase-interacting protein	NOSIP	1.6	1.96	1.17	0	0	0	FALSE	FALSE	FALSE	0
Q05516	ZBTB16 Zinc finger and BTB domain-containing protein 16	ZBTB16	0	1.96	0	0	0	0	FALSE	FALSE	FALSE	0
Q04637	EIF4G1 Eukaryotic translation initiation factor 4 gamma 1	EIF4G1	1.77	1.95	1.58	1.02	0.54	1.75	FALSE	FALSE	FALSE	0
Q08043	ACTN3 Alpha-actinin-3	ACTN3	0	1.94	1.79	0	0.64	0.69	FALSE	FALSE	FALSE	0
P49736	MCM2 DNA replication licensing factor MCM2	MCM2	1.77	1.94	1.75	0.3	0.82	0.52	FALSE	FALSE	FALSE	0
O60568	PLOD3 Procollagen-lysine,2-oxoglutarate 5-dioxygenase 3	PLOD3	1.72	1.94	1.72	0	0.18	0.32	FALSE	FALSE	FALSE	0
Q9UNX4	WDR3 WD repeat-containing protein 3	WDR3	1.57	1.94	1.52	0.48	0.21	0.01	FALSE	FALSE	FALSE	0
P39023	RPL3 60S ribosomal protein L3	RPL3	1.7	1.94	1.5	0.42	0.3	0.29	FALSE	FALSE	FALSE	0
Q14573	ITPR3 Inositol 1,4,5-trisphosphate receptor type 3	ITPR3	1.44	1.94	1.49	0.4	0	0	FALSE	FALSE	FALSE	0
P41227	NAA10 N-alpha-acetyltransferase 10	NAA10	0	1.94	1.36	0	0.34	2.38	FALSE	FALSE	FALSE	0
P51692	STAT5B Signal transducer and activator of transcription 5	STAT5B	1.58	1.94	1.34	0	0.26	0.09	FALSE	FALSE	FALSE	0
Q9H583	HEATR1 HEAT repeat-containing protein 1	HEATR1	1.46	1.94	1.29	0.29	0.24	0.38	FALSE	FALSE	FALSE	0
Q93008	USP9X Probable ubiquitin carboxyl-terminal hydrolase FAF	USP9X	1.54	1.94	1.25	0.33	0.64	1.26	FALSE	FALSE	FALSE	0
Q14197	ICT1 Peptidyl-tRNA hydrolase ICT1, mitochondrial	ICT1	1.43	1.94	0	0.71	0	0	FALSE	FALSE	FALSE	0
Q8IZ83	ALDH16A1 Aldehyde dehydrogenase family 16 member A1	ALDH16A1	0	1.94	0	0	0.16	0	FALSE	FALSE	FALSE	0
P53618	COPB1 Coatomer subunit beta	COPB1	1.81	1.93	1.38	0.52	1.07	0.25	FALSE	FALSE	FALSE	0
P51572	BCAP31 B-cell receptor-associated protein 31	BCAP31	1.77	1.93	1.36	0.43	0.32	0.25	FALSE	FALSE	FALSE	0
O95373	IPO7 Importin-7	IPO7	1.61	1.93	1.27	0.19	0.63	0.17	FALSE	FALSE	FALSE	0
P53582	METAP1 Methionine aminopeptidase 1	METAP1	1.98	1.92	1.87	0.18	0	0.52	FALSE	FALSE	FALSE	0
Q15645	TRIP13 Pachytene checkpoint protein 2 homolog	TRIP13	1.7	1.92	1.75	0.43	0.36	0.3	FALSE	FALSE	FALSE	0
Q96EE3	SEH1L Nucleoporin SEH1	SEH1L	0	1.92	1.64	0	0.22	0.22	FALSE	FALSE	FALSE	0
P98194	ATP2C1 Calcium-transporting ATPase type 2C member 1	ATP2C1	0	1.92	1.54	0	0.88	0	FALSE	FALSE	FALSE	0
Q9UKN8	GTF3C4 General transcription factor 3C polypeptide 4	GTF3C4	1.4	1.92	1.45	0.13	0.31	0.46	FALSE	FALSE	FALSE	0
Q9Y4F1	FARP1 FERM, RhoGEF and pleckstrin domain-containing prot	FARP1	0	1.92	1.36	0	0.37	0.43	FALSE	FALSE	FALSE	0
F6X838	COPG2 Coatomer subunit gamma-2	COPG2	1.21	1.92	1.35	0.46	0	0	FALSE	FALSE	FALSE	0
P42345	MTOR Serine/threonine-protein kinase mTOR	MTOR	0.8	1.92	1.32	0.3	0.38	1.49	FALSE	FALSE	FALSE	0
Q96T76	MMS19 MMS19 nucleotide excision repair protein homolog	MMS19	0	1.92	1.26	0	0.07	0.18	FALSE	FALSE	FALSE	0
P83436	COG7 Conserved oligomeric Golgi complex subunit 7	COG7	0	1.92	0	0	0.53	0	FALSE	FALSE	FALSE	0
Q9H267	VPS33B Vacuolar protein sorting-associated protein 33B	VPS33B	0	1.92	0	0	1.35	0	FALSE	FALSE	FALSE	0
Q9H0D6	XRN2 5-3 exoribonuclease 2	XRN2	1.58	1.91	1.9	0.21	0	0.29	FALSE	FALSE	FALSE	0
Q08AD1	CAMSAP2 Calmodulin-regulated spectrin-associated protein 2	CAMSAP2	0	1.91	1.6	0	0	1.9	FALSE	FALSE	FALSE	0
Q00610	CLTC Clathrin heavy chain 1	CLTC	1.68	1.91	1.52	0.48	1.64	0.34	FALSE	FALSE	FALSE	0
P35813	PPM1A Protein phosphatase 1A	PPM1A	0	1.91	0	0	0	0	FALSE	FALSE	FALSE	0
P54619	PRKAG1 5-AMP-activated protein kinase subunit gamma-1	PRKAG1	0	1.91	0	0	0	0	FALSE	FALSE	FALSE	0
Q9ULA0	DNPEP Aspartyl aminopeptidase	DNPEP	0	1.91	0	0	0	0	FALSE	FALSE	FALSE	0
P61421	ATP6V0D1 V-type proton ATPase subunit d 1	ATP6V0D1	1.43	1.9	1.71	0	0.34	0.71	FALSE	FALSE	FALSE	0
Q9HA64	FN3KRP Ketosamine-3-kinase	FN3KRP	0	1.9	1.71	0	0	0.39	FALSE	FALSE	FALSE	0
P63000	RAC1 Ras-related C3 botulinum toxin substrate 1	RAC1	1.55	1.9	1.6	0.3	0.3	0.38	FALSE	FALSE	FALSE	0
P52564	MAP2K6 Dual specificity mitogen-activated protein kinase	MAP2K6	1.59	1.9	1.58	0	0.13	0.19	FALSE	FALSE	FALSE	0
O14980	XPO1 Exportin-1	XPO1	1.72	1.9	1.54	0.18	0.6	0.31	FALSE	FALSE	FALSE	0
Q9BSJ8	ESYT1 Extended synaptotagmin-1	ESYT1	1.51	1.9	1.51	0.03	0.59	0.32	FALSE	FALSE	FALSE	0
P08648	ITGA5 Integrin alpha-5	ITGA5	1.71	1.9	1.48	0	0	0.41	FALSE	FALSE	FALSE	0
P22314	UBA1 Ubiquitin-like modifier-activating enzyme 1	UBA1	1.69	1.9	1.44	2.86	0.41	2.03	FALSE	FALSE	FALSE	0
O00560	SDCBP Syntenin-1	SDCBP	1.83	1.9	0	0	0.14	0	FALSE	FALSE	FALSE	0
Q9BZG1	RAB34 Ras-related protein Rab-34	RAB34	0	1.89	1.74	0	0	1.49	FALSE	FALSE	FALSE	0
Q9UGI8	TES Testin	TES	1.94	1.89	1.72	0.41	0.3	2.92	FALSE	FALSE	FALSE	0
Q13123	IK Protein Red	IK	1.58	1.89	1.56	0	0.34	0.25	FALSE	FALSE	FALSE	0
Q07020	RPL18 60S ribosomal protein L18	RPL18	1.79	1.89	1.48	0.23	0.33	0.36	FALSE	FALSE	FALSE	0
Q14204	DYNC1H1 Cytoplasmic dynein 1 heavy chain 1	DYNC1H1	1.5	1.89	1.38	0.45	0.63	0.44	FALSE	FALSE	FALSE	0
P62910	RPL32 60S ribosomal protein L32	RPL32	1.69	1.89	1.32	0.25	0.5	0.21	FALSE	FALSE	FALSE	0
P17152	TMEM11 Transmembrane protein 11, mitochondrial	TMEM11	0	1.89	0	0	0	0	FALSE	FALSE	FALSE	0
Q5SY16	NOL9 Polynucleotide 5-hydroxyl-kinase NOL9	NOL9	0	1.89	0	0	0	0	FALSE	FALSE	FALSE	0
P41214	EIF2D Eukaryotic translation initiation factor 2D	EIF2D	0	1.88	1.81	0	0.17	1.05	FALSE	FALSE	FALSE	0
P49792	RANBP2 E3 SUMO-protein ligase RanBP2	RANBP2	1.91	1.88	1.69	1.35	0.39	0.47	FALSE	FALSE	FALSE	0
Q9NQW7	XPNPEP1 Xaa-Pro aminopeptidase 1	XPNPEP1	0	1.88	1.6	0	0.11	7.77	FALSE	FALSE	FALSE	0
Q13423	NNT NAD(P) transhydrogenase, mitochondrial	NNT	1.75	1.88	1.45	0.99	3.28	0.3	FALSE	FALSE	FALSE	0
Q15436	SEC23A Protein transport protein Sec23A	SEC23A	1.92	1.88	1.44	0.25	0.22	0.23	FALSE	FALSE	FALSE	0
Q9Y5L0	TNPO3 Transportin-3	TNPO3	1.5	1.88	1.31	0.68	0.53	0.46	FALSE	FALSE	FALSE	0
[truncated: 1,241 more rows]

## Sheet: Sheet2
Quantified N-homocysteinylated proteins both in vitro and in situ
ipi	description
A0AVT1	UBA6 Ubiquitin-like modifier-activating enzyme 6
A0MZ66	KIAA1598 Shootin-1
A1X283	SH3PXD2B SH3 and PX domain-containing protein 2B
A6NE09	RPSAP58 Protein RPSAP58
A6NHR9	SMCHD1 Structural maintenance of chromosomes flexible hin
A8MW45	KRT17P1 Protein KRT17P1
E7EVH7	KLC1 Kinesin light chain 1
O00139	KIF2A Kinesin-like protein KIF2A
O00148	DDX39A ATP-dependent RNA helicase DDX39A
O00151	PDLIM1 PDZ and LIM domain protein 1
O00154	ACOT7 Cytosolic acyl coenzyme A thioester hydrolase
O00170	AIP AH receptor-interacting protein
O00232	PSMD12 26S proteasome non-ATPase regulatory subunit 12
O00299	CLIC1 Chloride intracellular channel protein 1
O00303	EIF3F Eukaryotic translation initiation factor 3 subunit
O00425	IGF2BP3 Insulin-like growth factor 2 mRNA-binding protein
O00429	DNM1L Dynamin-1-like protein
O00469	PLOD2 Procollagen-lysine,2-oxoglutarate 5-dioxygenase 2
O00471	EXOC5 Exocyst complex component 5
O00629	KPNA4 Importin subunit alpha-4
O00764	PDXK Pyridoxal kinase
O14579	COPE Coatomer subunit epsilon
O14602	EIF1AY Eukaryotic translation initiation factor 1A, Y-chr
O14776	TCERG1 Transcription elongation regulator 1
O14818	PSMA7 Proteasome subunit alpha type-7
O14929	HAT1 Histone acetyltransferase type B catalytic subunit
O14950	MYL12B Myosin regulatory light chain 12B
O14974	PPP1R12A Protein phosphatase 1 regulatory subunit 12A
O14979	HNRPDL Heterogeneous nuclear ribonucleoprotein D-like
O15143	ARPC1B Actin-related protein 2/3 complex subunit 1B
O15144	ARPC2 Actin-related protein 2/3 complex subunit 2
O15145	ARPC3 Actin-related protein 2/3 complex subunit 3
O15173	PGRMC2 Membrane-associated progesterone receptor componen
O15305	PMM2 Phosphomannomutase 2
O15347	HMGB3 High mobility group protein B3
O15355	PPM1G Protein phosphatase 1G
O15372	EIF3H Eukaryotic translation initiation factor 3 subunit
O43148	RNMT mRNA cap guanine-N7 methyltransferase
O43175	PHGDH D-3-phosphoglycerate dehydrogenase
O43237	DYNC1LI2 Cytoplasmic dynein 1 light intermediate chain 2
O43242	PSMD3 26S proteasome non-ATPase regulatory subunit 3
O43252	PAPSS1 Bifunctional 3-phosphoadenosine 5-phosphosulfate
O43390	HNRNPR Heterogeneous nuclear ribonucleoprotein R
O43395	PRPF3 U4/U6 small nuclear ribonucleoprotein Prp3
O43447	PPIH Peptidyl-prolyl cis-trans isomerase H
O43615	TIMM44 Mitochondrial import inner membrane translocase su
O43633	CHMP2A Charged multivesicular body protein 2a
O43815	STRN Striatin
O43818	RRP9 U3 small nucleolar RNA-interacting protein 2
O43837	IDH3B Isocitrate dehydrogenase
O43852	CALU Calumenin
O43865	AHCYL1 Putative adenosylhomocysteinase 2
O60437	PPL Periplakin
O60506	SYNCRIP Heterogeneous nuclear ribonucleoprotein Q
O60610	DIAPH1 Protein diaphanous homolog 1
O60684	KPNA6 Importin subunit alpha-7
O60701	UGDH UDP-glucose 6-dehydrogenase
O60749	SNX2 Sorting nexin-2
O60841	EIF5B Eukaryotic translation initiation factor 5B
O60869	EDF1 Endothelial differentiation-related factor 1
O75083	WDR1 WD repeat-containing protein 1
O75116	ROCK2 Rho-associated protein kinase 2
O75152	ZC3H11A Zinc finger CCCH domain-containing protein 11A
O75223	GGCT Gamma-glutamylcyclotransferase
O75323	GBAS Protein NipSnap homolog 2
O75367	H2AFY Core histone macro-H2A.1
O75369	FLNB Filamin-B
O75390	CS Citrate synthase, mitochondrial
O75400	PRPF40A Pre-mRNA-processing factor 40 homolog A
O75436	VPS26A Vacuolar protein sorting-associated protein 26A
O75475	PSIP1 PC4 and SFRS1-interacting protein
O75477	ERLIN1 Erlin-1
O75569	PRKRA Interferon-inducible double stranded RNA-dependent
O75717	WDHD1 WD repeat and HMG-box DNA-binding protein 1
O75746	SLC25A12 Calcium-binding mitochondrial carrier protein Aral
O75821	EIF3G Eukaryotic translation initiation factor 3 subunit
O75874	IDH1 Isocitrate dehydrogenase
O75937	DNAJC8 DnaJ homolog subfamily C member 8
O75940	SMNDC1 Survival of motor neuron-related-splicing factor 3
O76003	GLRX3 Glutaredoxin-3
O76031	CLPX ATP-dependent Clp protease ATP-binding subunit clp
O76070	SNCG Gamma-synuclein
O76094	SRP72 Signal recognition particle 72 kDa protein
O94826	TOMM70A Mitochondrial import receptor subunit TOM70
O94905	ERLIN2 Erlin-2
O94906	PRPF6 Pre-mRNA-processing factor 6
O94925	GLS Glutaminase kidney isoform, mitochondrial
O95218	ZRANB2 Zinc finger Ran-binding domain-containing protein
O95239	KIF4A Chromosome-associated kinesin KIF4A
O95302	FKBP9 Peptidyl-prolyl cis-trans isomerase FKBP9
O95340	PAPSS2 Bifunctional 3-phosphoadenosine 5-phosphosulfate
O95347	SMC2 Structural maintenance of chromosomes protein 2
O95361	TRIM16 Tripartite motif-containing protein 16
O95394	PGM3 Phosphoacetylglucosamine mutase
O95433	AHSA1 Activator of 90 kDa heat shock protein ATPase homo
O95757	HSPA4L Heat shock 70 kDa protein 4L
O95801	TTC4 Tetratricopeptide repeat protein 4
O95816	BAG2 BAG family molecular chaperone regulator 2
O95831	AIFM1 Apoptosis-inducing factor 1, mitochondrial
O95861	BPNT1 3(2),5-bisphosphate nucleotidase 1
P00387	CYB5R3 NADH-cytochrome b5 reductase 3
P00491	PNP Purine nucleoside phosphorylase
P00492	HPRT1 Hypoxanthine-guanine phosphoribosyltransferase
P00505	GOT2 Aspartate aminotransferase, mitochondrial
P00558	PGK1 Phosphoglycerate kinase 1
P00918	CA2 Carbonic anhydrase 2
P02545	LMNA Prelamin-A/C
P04075	ALDOA Fructose-bisphosphate aldolase A
P04083	ANXA1 Annexin A1
P04181	OAT Ornithine aminotransferase, mitochondrial
P04406	GAPDH Glyceraldehyde-3-phosphate dehydrogenase
P05091	ALDH2 Aldehyde dehydrogenase, mitochondrial
P05161	ISG15 Ubiquitin-like protein ISG15
P05198	EIF2S1 Eukaryotic translation initiation factor 2 subunit
P05388	RPLP0 60S acidic ribosomal protein P0
P05455	SSB Lupus La protein
P06132	UROD Uroporphyrinogen decarboxylase
P06396	GSN Gelsolin
P06493	CDK1 Cyclin-dependent kinase 1
P06576	ATP5B ATP synthase subunit beta, mitochondrial
P06730	EIF4E Eukaryotic translation initiation factor 4E
P06733	ENO1 Alpha-enolase
P06748	NPM1 Nucleophosmin
P06753	TPM3 Tropomyosin alpha-3 chain
P07237	P4HB Protein disulfide-isomerase
P07355	ANXA2 Annexin A2
P07437	TUBB Tubulin beta chain
P07737	PFN1 Profilin-1
P07741	APRT Adenine phosphoribosyltransferase
P07814	EPRS Bifunctional glutamate/proline--tRNA ligase
P07900	HSP90AA1 Heat shock protein HSP 90-alpha
P07910	HNRNPC Heterogeneous nuclear ribonucleoproteins C1/C2
P07954	FH Fumarate hydratase, mitochondrial
P08107	HSPA1B Heat shock 70 kDa protein 1A/1B
P08133	ANXA6 Annexin A6
P08237	PFKM 6-phosphofructokinase, muscle type
P08238	HSP90AB1 Heat shock protein HSP 90-beta
P08559	PDHA1 Pyruvate dehydrogenase E1 component subunit alpha,
P08579	SNRPB2 U2 small nuclear ribonucleoprotein B
P08670	VIM Vimentin
P08758	ANXA5 Annexin A5
P09012	SNRPA U1 small nuclear ribonucleoprotein A
P09104	ENO2 Gamma-enolase
P09211	GSTP1 Glutathione S-transferase P
P09382	LGALS1 Galectin-1
P09429	HMGB1 High mobility group protein B1
P09488	GSTM1 Glutathione S-transferase Mu 1
P09493	TPM1 Tropomyosin alpha-1 chain
P09525	ANXA4 Annexin A4
P09543	CNP 2,3-cyclic-nucleotide 3-phosphodiesterase
P09622	DLD Dihydrolipoyl dehydrogenase, mitochondrial
P09651	HNRNPA1 Heterogeneous nuclear ribonucleoprotein A1
P09661	SNRPA1 U2 small nuclear ribonucleoprotein A
P09874	PARP1 Poly
P09972	ALDOC Fructose-bisphosphate aldolase C
P10412	HIST1H1E Histone H1.4
P10515	DLAT Dihydrolipoyllysine-residue acetyltransferase comp
P10599	TXN Thioredoxin
P10620	MGST1 Microsomal glutathione S-transferase 1
P10644	PRKAR1A cAMP-dependent protein kinase type I-alpha regulat
P10768	ESD S-formylglutathione hydrolase
P10809	HSPD1 60 kDa heat shock protein, mitochondrial
P11021	HSPA5 78 kDa glucose-regulated protein
P11142	HSPA8 Heat shock cognate 71 kDa protein
P11172	UMPS Uridine 5-monophosphate synthase
P11310	ACADM Medium-chain specific acyl-CoA dehydrogenase, mito
P11413	G6PD Glucose-6-phosphate 1-dehydrogenase
P11586	MTHFD1 C-1-tetrahydrofolate synthase, cytoplasmic
P11766	ADH5 Alcohol dehydrogenase class-3
P11908	PRPS2 Ribose-phosphate pyrophosphokinase 2
P11940	PABPC1 Polyadenylate-binding protein 1
P12004	PCNA Proliferating cell nuclear antigen
P12081	HARS Histidine--tRNA ligase, cytoplasmic
P12268	IMPDH2 Inosine-5-monophosphate dehydrogenase 2
P12270	TPR Nucleoprotein TPR
P12429	ANXA3 Annexin A3
P13010	XRCC5 X-ray repair cross-complementing protein 5
P13073	COX4I1 Cytochrome c oxidase subunit 4 isoform 1, mitochon
P13639	EEF2 Elongation factor 2
P13667	PDIA4 Protein disulfide-isomerase A4
P13674	P4HA1 Prolyl 4-hydroxylase subunit alpha-1
P13693	TPT1 Translationally-controlled tumor protein
P13797	PLS3 Plastin-3
P13804	ETFA Electron transfer flavoprotein subunit alpha, mito
P13861	PRKAR2A cAMP-dependent protein kinase type II-alpha regula
P13928	ANXA8 Annexin A8
P13929	ENO3 Beta-enolase
P13987	CD59 CD59 glycoprotein
P14314	PRKCSH Glucosidase 2 subunit beta
P14550	AKR1A1 Alcohol dehydrogenase
P14618	PKM Pyruvate kinase isozymes M1/M2
P14625	HSP90B1 Endoplasmin
P14678	SNRPB Small nuclear ribonucleoprotein-associated protein
P14868	DARS Aspartate--tRNA ligase, cytoplasmic
P15121	AKR1B1 Aldose reductase
P15170	GSPT1 Eukaryotic peptide chain release factor GTP-bindin
P15311	EZR Ezrin
P15531	NME1 Nucleoside diphosphate kinase A
P15559	NQO1 NAD(P)H dehydrogenase
P15880	RPS2 40S ribosomal protein S2
P16152	CBR1 Carbonyl reductase
P16401	HIST1H1B Histone H1.5
P16402	HIST1H1D Histone H1.3
P16403	HIST1H1C Histone H1.2
P17066	HSPA6 Heat shock 70 kDa protein 6
P17174	GOT1 Aspartate aminotransferase, cytoplasmic
P17612	PRKACA cAMP-dependent protein kinase catalytic subunit al
P17812	CTPS1 CTP synthase 1
P17844	DDX5 Probable ATP-dependent RNA helicase DDX5
P17858	PFKL 6-phosphofructokinase, liver type
P17980	PSMC3 26S protease regulatory subunit 6A
P17987	TCP1 T-complex protein 1 subunit alpha
P18206	VCL Vinculin
P18669	PGAM1 Phosphoglycerate mutase 1
P18754	RCC1 Regulator of chromosome condensation
P19338	NCL Nucleolin
P19525	EIF2AK2 Interferon-induced, double-stranded RNA-activated
P19623	SRM Spermidine synthase
P20042	EIF2S2 Eukaryotic translation initiation factor 2 subunit
P20073	ANXA7 Annexin A7
P20290	BTF3 Transcription factor BTF3
P20340	RAB6A Ras-related protein Rab-6A
P20618	PSMB1 Proteasome subunit beta type-1
P20700	LMNB1 Lamin-B1
P20810	CAST Calpastatin
P20839	IMPDH1 Inosine-5-monophosphate dehydrogenase 1
P21281	ATP6V1B2 V-type proton ATPase subunit B, brain isoform
P21291	CSRP1 Cysteine and glycine-rich protein 1
P21399	ACO1 Cytoplasmic aconitate hydratase
P21796	VDAC1 Voltage-dependent anion-selective channel protein
P22059	OSBP Oxysterol-binding protein 1
P22061	PCMT1 Protein-L-isoaspartate(D-aspartate) O-methyltransf
P22102	GART Trifunctional purine biosynthetic protein adenosin
P22234	PAICS Multifunctional protein ADE2
P22307	SCP2 Non-specific lipid-transfer protein
P22392	NME2 Nucleoside diphosphate kinase B
P22626	HNRNPA2B1 Heterogeneous nuclear ribonucleoproteins A2/B1
P22695	UQCRC2 Cytochrome b-c1 complex subunit 2, mitochondrial
P23193	TCEA1 Transcription elongation factor A protein 1
P23246	SFPQ Splicing factor, proline- and glutamine-rich
P23284	PPIB Peptidyl-prolyl cis-trans isomerase B
P23368	ME2 NAD-dependent malic enzyme, mitochondrial
P23381	WARS Tryptophan--tRNA ligase, cytoplasmic
P23396	RPS3 40S ribosomal protein S3
P23528	CFL1 Cofilin-1
P23588	EIF4B Eukaryotic translation initiation factor 4B
P23919	DTYMK Thymidylate kinase
P23921	RRM1 Ribonucleoside-diphosphate reductase large subunit
P24534	EEF1B2 Elongation factor 1-beta
P24539	ATP5F1 ATP synthase subunit b, mitochondrial
P24752	ACAT1 Acetyl-CoA acetyltransferase, mitochondrial
P25398	RPS12 40S ribosomal protein S12
P25685	DNAJB1 DnaJ homolog subfamily B member 1
P25705	ATP5A1 ATP synthase subunit alpha, mitochondrial
P25788	PSMA3 Proteasome subunit alpha type-3
P25789	PSMA4 Proteasome subunit alpha type-4
P26038	MSN Moesin
P26368	U2AF2 Splicing factor U2AF 65 kDa subunit
P26440	IVD Isovaleryl-CoA dehydrogenase, mitochondrial
P26583	HMGB2 High mobility group protein B2
P26885	FKBP2 Peptidyl-prolyl cis-trans isomerase FKBP2
P27348	YWHAQ 14-3-3 protein theta
P27694	RPA1 Replication protein A 70 kDa DNA-binding subunit
P27695	APEX1 DNA-(apurinic or apyrimidinic site) lyase
P27707	DCK Deoxycytidine kinase
P27816	MAP4 Microtubule-associated protein 4
P28066	PSMA5 Proteasome subunit alpha type-5
P28070	PSMB4 Proteasome subunit beta type-4
P28340	POLD1 DNA polymerase delta catalytic subunit
P28482	MAPK1 Mitogen-activated protein kinase 1
P28838	LAP3 Cytosol aminopeptidase
P29144	TPP2 Tripeptidyl-peptidase 2
P29692	EEF1D Elongation factor 1-delta
P30040	ERP29 Endoplasmic reticulum resident protein 29
P30041	PRDX6 Peroxiredoxin-6
P30043	BLVRB Flavin reductase (NADPH)
P30044	PRDX5 Peroxiredoxin-5, mitochondrial
P30048	PRDX3 Thioredoxin-dependent peroxide reductase, mitochon
P30050	RPL12 60S ribosomal protein L12
P30084	ECHS1 Enoyl-CoA hydratase, mitochondrial
P30085	CMPK1 UMP-CMP kinase
P30086	PEBP1 Phosphatidylethanolamine-binding protein 1
P30101	PDIA3 Protein disulfide-isomerase A3
P30153	PPP2R1A Serine/threonine-protein phosphatase 2A 65 kDa reg
P30405	PPIF Peptidyl-prolyl cis-trans isomerase F, mitochondri
P30520	ADSS Adenylosuccinate synthetase isozyme 2
P30533	LRPAP1 Alpha-2-macroglobulin receptor-associated protein
P30740	SERPINB1 Leukocyte elastase inhibitor
P30837	ALDH1B1 Aldehyde dehydrogenase X, mitochondrial
P30838	ALDH3A1 Aldehyde dehydrogenase, dimeric NADP-preferring
P31150	GDI1 Rab GDP dissociation inhibitor alpha
P31153	MAT2A S-adenosylmethionine synthase isoform type-2
P31327	CPS1 Carbamoyl-phosphate synthase
P31689	DNAJA1 DnaJ homolog subfamily A member 1
P31937	HIBADH 3-hydroxyisobutyrate dehydrogenase, mitochondrial
P31943	HNRNPH1 Heterogeneous nuclear ribonucleoprotein H
P31946	YWHAB 14-3-3 protein beta/alpha
P31947	SFN 14-3-3 protein sigma
P31948	STIP1 Stress-induced-phosphoprotein 1
P32119	PRDX2 Peroxiredoxin-2
P32322	PYCR1 Pyrroline-5-carboxylate reductase 1, mitochondrial
P32456	GBP2 Interferon-induced guanylate-binding protein 2
P32969	RPL9P9 60S ribosomal protein L9
P33176	KIF5B Kinesin-1 heavy chain
P33316	DUT Deoxyuridine 5-triphosphate nucleotidohydrolase,
P33992	MCM5 DNA replication licensing factor MCM5
P34896	SHMT1 Serine hydroxymethyltransferase, cytosolic
P34897	SHMT2 Serine hydroxymethyltransferase, mitochondrial
P34932	HSPA4 Heat shock 70 kDa protein 4
P35232	PHB Prohibitin
P35237	SERPINB6 Serpin B6
P35241	RDX Radixin
P35249	RFC4 Replication factor C subunit 4
P35251	RFC1 Replication factor C subunit 1
P35268	RPL22 60S ribosomal protein L22
P35269	GTF2F1 General transcription factor IIF subunit 1
P35579	MYH9 Myosin-9
P35613	BSG Basigin
P35637	FUS RNA-binding protein FUS
P35659	DEK Protein DEK
P35998	PSMC2 26S protease regulatory subunit 7
P36542	ATP5C1 ATP synthase subunit gamma, mitochondrial
P36543	ATP6V1E1 V-type proton ATPase subunit E 1
P36776	LONP1 Lon protease homolog, mitochondrial
P36871	PGM1 Phosphoglucomutase-1
P36873	PPP1CC Serine/threonine-protein phosphatase PP1-gamma cat
P36952	SERPINB5 Serpin B5
P36957	DLST Dihydrolipoyllysine-residue succinyltransferase co
P37108	SRP14 Signal recognition particle 14 kDa protein
P37837	TALDO1 Transaldolase
P38117	ETFB Electron transfer flavoprotein subunit beta
P38159	RBMX RNA-binding motif protein, X chromosome
P38606	ATP6V1A V-type proton ATPase catalytic subunit A
P38646	HSPA9 Stress-70 protein, mitochondrial
P38919	EIF4A3 Eukaryotic initiation factor 4A-III
P39019	RPS19 40S ribosomal protein S19
P39687	ANP32A Acidic leucine-rich nuclear phosphoprotein 32 fami
P39748	FEN1 Flap endonuclease 1
P40121	CAPG Macrophage-capping protein
P40123	CAP2 Adenylyl cyclase-associated protein 2
P40222	TXLNA Alpha-taxilin
P40227	CCT6A T-complex protein 1 subunit zeta
P40261	NNMT Nicotinamide N-methyltransferase
P40925	MDH1 Malate dehydrogenase, cytoplasmic
P40926	MDH2 Malate dehydrogenase, mitochondrial
P40939	HADHA Trifunctional enzyme subunit alpha, mitochondrial
P41091	EIF2S3 Eukaryotic translation initiation factor 2 subunit
P41240	CSK Tyrosine-protein kinase CSK
P41250	GARS Glycine--tRNA ligase
P42166	TMPO Lamina-associated polypeptide 2, isoform alpha
P42167	TMPO Lamina-associated polypeptide 2, isoforms beta/gam
P42224	STAT1 Signal transducer and activator of transcription 1
P42330	AKR1C3 Aldo-keto reductase family 1 member C3
P42765	ACAA2 3-ketoacyl-CoA thiolase, mitochondrial
P42766	RPL35 60S ribosomal protein L35
P43034	PAFAH1B1 Platelet-activating factor acetylhydrolase IB subu
P43121	MCAM Cell surface glycoprotein MUC18
P43243	MATR3 Matrin-3
P43246	MSH2 DNA mismatch repair protein Msh2
P43304	GPD2 Glycerol-3-phosphate dehydrogenase, mitochondrial
P43490	NAMPT Nicotinamide phosphoribosyltransferase
P43686	PSMC4 26S protease regulatory subunit 6B
P43897	TSFM Elongation factor Ts, mitochondrial
P45880	VDAC2 Voltage-dependent anion-selective channel protein
P46060	RANGAP1 Ran GTPase-activating protein 1
P46063	RECQL ATP-dependent DNA helicase Q1
P46782	RPS5 40S ribosomal protein S5
P46783	RPS10 40S ribosomal protein S10
P46821	MAP1B Microtubule-associated protein 1B
P46926	GNPDA1 Glucosamine-6-phosphate isomerase 1
P47755	CAPZA2 F-actin-capping protein subunit alpha-2
P47756	CAPZB F-actin-capping protein subunit beta
P48047	ATP5O ATP synthase subunit O, mitochondrial
P48059	LIMS1 LIM and senescent cell antigen-like-containing dom
P48163	ME1 NADP-dependent malic enzyme
P48444	ARCN1 Coatomer subunit delta
P48507	GCLM Glutamate--cysteine ligase regulatory subunit
P48637	GSS Glutathione synthetase
P48643	CCT5 T-complex protein 1 subunit epsilon
P48735	IDH2 Isocitrate dehydrogenase
P48739	PITPNB Phosphatidylinositol transfer protein beta isoform
P49189	ALDH9A1 4-trimethylaminobutyraldehyde dehydrogenase
P49257	LMAN1 Protein ERGIC-53
P49321	NASP Nuclear autoantigenic sperm protein
P49368	CCT3 T-complex protein 1 subunit gamma
P49411	TUFM Elongation factor Tu, mitochondrial
P49419	ALDH7A1 Alpha-aminoadipic semialdehyde dehydrogenase
P49585	PCYT1A Choline-phosphate cytidylyltransferase A
P49588	AARS Alanine--tRNA ligase, cytoplasmic
P49590	HARS2 Probable histidine--tRNA ligase, mitochondrial
P49591	SARS Serine--tRNA ligase, cytoplasmic
P49720	PSMB3 Proteasome subunit beta type-3
P49721	PSMB2 Proteasome subunit beta type-2
P49748	ACADVL Very long-chain specific acyl-CoA dehydrogenase, m
P49756	RBM25 RNA-binding protein 25
P49915	GMPS GMP synthase
P50213	IDH3A Isocitrate dehydrogenase
P50395	GDI2 Rab GDP dissociation inhibitor beta
P50454	SERPINH1 Serpin H1
P50502	ST13 Hsc70-interacting protein
P50570	DNM2 Dynamin-2
P50914	RPL14 60S ribosomal protein L14
P50990	CCT8 T-complex protein 1 subunit theta
P50991	CCT4 T-complex protein 1 subunit delta
P50995	ANXA11 Annexin A11
P51114	FXR1 Fragile X mental retardation syndrome-related prot
P51148	RAB5C Ras-related protein Rab-5C
P51553	IDH3G Isocitrate dehydrogenase
P51610	HCFC1 Host cell factor 1
P51659	HSD17B4 Peroxisomal multifunctional enzyme type 2
P51665	PSMD7 26S proteasome non-ATPase regulatory subunit 7
P51991	HNRNPA3 Heterogeneous nuclear ribonucleoprotein A3
P52272	HNRNPM Heterogeneous nuclear ribonucleoprotein M
P52292	KPNA2 Importin subunit alpha-2
P52565	ARHGDIA Rho GDP-dissociation inhibitor 1
P52594	AGFG1 Arf-GAP domain and FG repeat-containing protein 1
P52597	HNRNPF Heterogeneous nuclear ribonucleoprotein F
P52788	SMS Spermine synthase
P52888	THOP1 Thimet oligopeptidase
P52895	AKR1C2 Aldo-keto reductase family 1 member C2
P52907	CAPZA1 F-actin-capping protein subunit alpha-1
P52943	CRIP2 Cysteine-rich protein 2
P53004	BLVRA Biliverdin reductase A
P53041	PPP5C Serine/threonine-protein phosphatase 5
P53999	SUB1 Activated RNA polymerase II transcriptional coacti
P54577	YARS Tyrosine--tRNA ligase, cytoplasmic
P54578	USP14 Ubiquitin carboxyl-terminal hydrolase 14
P54819	AK2 Adenylate kinase 2, mitochondrial
P54920	NAPA Alpha-soluble NSF attachment protein
P55010	EIF5 Eukaryotic translation initiation factor 5
P55072	VCP Transitional endoplasmic reticulum ATPase
P55084	HADHB Trifunctional enzyme subunit beta, mitochondrial
P55145	MANF Mesencephalic astrocyte-derived neurotrophic facto
P55209	NAP1L1 Nucleosome assembly protein 1-like 1
P55265	ADAR Double-stranded RNA-specific adenosine deaminase
P55786	NPEPPS Puromycin-sensitive aminopeptidase
P55809	OXCT1 Succinyl-CoA:3-ketoacid coenzyme A transferase 1,
P55884	EIF3B Eukaryotic translation initiation factor 3 subunit
P57721	PCBP3 Poly(rC)-binding protein 3
P60174	TPI1 Triosephosphate isomerase
P60709	ACTB Actin, cytoplasmic 1
P60842	EIF4A1 Eukaryotic initiation factor 4A-I
P60866	RPS20 40S ribosomal protein S20
P60891	PRPS1 Ribose-phosphate pyrophosphokinase 1
P60900	PSMA6 Proteasome subunit alpha type-6
P60981	DSTN Destrin
P61006	RAB8A Ras-related protein Rab-8A
P61011	SRP54 Signal recognition particle 54 kDa protein
P61019	RAB2A Ras-related protein Rab-2A
P61081	UBE2M NEDD8-conjugating enzyme Ubc12
P61088	UBE2N Ubiquitin-conjugating enzyme E2 N
P61106	RAB14 Ras-related protein Rab-14
P61158	ACTR3 Actin-related protein 3
P61160	ACTR2 Actin-related protein 2
P61163	ACTR1A Alpha-centractin
P61201	COPS2 COP9 signalosome complex subunit 2
P61224	RAP1B Ras-related protein Rap-1b
P61247	RPS3A 40S ribosomal protein S3a
P61254	RPL26 60S ribosomal protein L26
P61289	PSME3 Proteasome activator complex subunit 3
P61513	RPL37A 60S ribosomal protein L37a
P61604	HSPE1 10 kDa heat shock protein, mitochondrial
P61758	VBP1 Prefoldin subunit 3
P61764	STXBP1 Syntaxin-binding protein 1
P61923	COPZ1 Coatomer subunit zeta-1
P61978	HNRNPK Heterogeneous nuclear ribonucleoprotein K
P61981	YWHAG 14-3-3 protein gamma
P62081	RPS7 40S ribosomal protein S7
P62136	PPP1CA Serine/threonine-protein phosphatase PP1-alpha cat
P62140	PPP1CB Serine/threonine-protein phosphatase PP1-beta cata
P62191	PSMC1 26S protease regulatory subunit 4
P62195	PSMC5 26S protease regulatory subunit 8
P62241	RPS8 40S ribosomal protein S8
P62249	RPS16 40S ribosomal protein S16
P62258	YWHAE 14-3-3 protein epsilon
P62263	RPS14 40S ribosomal protein S14
P62269	RPS18 40S ribosomal protein S18
P62316	SNRPD2 Small nuclear ribonucleoprotein Sm D2
P62318	SNRPD3 Small nuclear ribonucleoprotein Sm D3
P62333	PSMC6 26S protease regulatory subunit 10B
P62424	RPL7A 60S ribosomal protein L7a
P62495	ETF1 Eukaryotic peptide chain release factor subunit 1
P62633	CNBP Cellular nucleic acid-binding protein
P62750	RPL23A 60S ribosomal protein L23a
P62753	RPS6 40S ribosomal protein S6
P62820	RAB1A Ras-related protein Rab-1A
P62826	RAN GTP-binding nuclear protein Ran
P62847	RPS24 40S ribosomal protein S24
P62851	RPS25 40S ribosomal protein S25
P62888	RPL30 60S ribosomal protein L30
P62899	RPL31 60S ribosomal protein L31
P62913	RPL11 60S ribosomal protein L11
P62917	RPL8 60S ribosomal protein L8
P62937	PPIA Peptidyl-prolyl cis-trans isomerase A
P63104	YWHAZ 14-3-3 protein zeta/delta
P63151	PPP2R2A Serine/threonine-protein phosphatase 2A 55 kDa reg
P63162	SNRPN Small nuclear ribonucleoprotein-associated protein
P63167	DYNLL1 Dynein light chain 1, cytoplasmic
P63173	RPL38 60S ribosomal protein L38
P63244	GNB2L1 Guanine nucleotide-binding protein subunit beta-2-
P67809	YBX1 Nuclease-sensitive element-binding protein 1
P67936	TPM4 Tropomyosin alpha-4 chain
P68104	EEF1A1 Elongation factor 1-alpha 1
P68133	ACTA1 Actin, alpha skeletal muscle
P68366	TUBA4A Tubulin alpha-4A chain
P68371	TUBB4B Tubulin beta-4B chain
P68400	CSNK2A1 Casein kinase II subunit alpha
P78347	GTF2I General transcription factor II-I
P78417	GSTO1 Glutathione S-transferase omega-1
P82650	MRPS22 28S ribosomal protein S22, mitochondrial
P82933	MRPS9 28S ribosomal protein S9, mitochondrial
P83731	RPL24 60S ribosomal protein L24
P98175	RBM10 RNA-binding protein 10
P99999	CYCS Cytochrome c
Q00059	TFAM Transcription factor A, mitochondrial
Q00169	PITPNA Phosphatidylinositol transfer protein alpha isofor
Q00577	PURA Transcriptional activator protein Pur-alpha
Q00688	FKBP3 Peptidyl-prolyl cis-trans isomerase FKBP3
Q00796	SORD Sorbitol dehydrogenase
Q00839	HNRNPU Heterogeneous nuclear ribonucleoprotein U
Q01085	TIAL1 Nucleolysin TIAR
Q01105	SET Protein SET
Q01469	FABP5 Fatty acid-binding protein, epidermal
Q01518	CAP1 Adenylyl cyclase-associated protein 1
Q01813	PFKP 6-phosphofructokinase type C
Q02790	FKBP4 Peptidyl-prolyl cis-trans isomerase FKBP4
Q02809	PLOD1 Procollagen-lysine,2-oxoglutarate 5-dioxygenase 1
Q02878	RPL6 60S ribosomal protein L6
Q03252	LMNB2 Lamin-B2
Q04828	AKR1C1 Aldo-keto reductase family 1 member C1
Q04917	YWHAH 14-3-3 protein eta
Q05048	CSTF1 Cleavage stimulation factor subunit 1
Q05639	EEF1A2 Elongation factor 1-alpha 2
Q05682	CALD1 Caldesmon
Q06124	PTPN11 Tyrosine-protein phosphatase non-receptor type 11
Q06323	PSME1 Proteasome activator complex subunit 1
Q06830	PRDX1 Peroxiredoxin-1
Q07065	CKAP4 Cytoskeleton-associated protein 4
Q07157	TJP1 Tight junction protein ZO-1
Q07666	KHDRBS1 KH domain-containing, RNA-binding, signal transduc
Q07866	KLC1 Kinesin light chain 1
Q08257	CRYZ Quinone oxidoreductase
Q08379	GOLGA2 Golgin subfamily A member 2
Q08752	PPID Peptidyl-prolyl cis-trans isomerase D
Q08945	SSRP1 FACT complex subunit SSRP1
Q09028	RBBP4 Histone-binding protein RBBP4
Q0VDF9	HSPA14 Heat shock 70 kDa protein 14
Q12792	TWF1 Twinfilin-1
Q12874	SF3A3 Splicing factor 3A subunit 3
Q12904	AIMP1 Aminoacyl tRNA synthase complex-interacting multif
Q12931	TRAP1 Heat shock protein 75 kDa, mitochondrial
Q12933	TRAF2 TNF receptor-associated factor 2
Q13011	ECH1 Delta(3,5)-Delta(2,4)-dienoyl-CoA isomerase, mitoc
Q13098	GPS1 COP9 signalosome complex subunit 1
Q13107	USP4 Ubiquitin carboxyl-terminal hydrolase 4
Q13126	MTAP S-methyl-5-thioadenosine phosphorylase
Q13148	TARDBP TAR DNA-binding protein 43
Q13162	PRDX4 Peroxiredoxin-4
Q13177	PAK2 Serine/threonine-protein kinase PAK 2
Q13217	DNAJC3 DnaJ homolog subfamily C member 3
Q13283	G3BP1 Ras GTPase-activating protein-binding protein 1
Q13310	PABPC4 Polyadenylate-binding protein 4
Q13409	DYNC1I2 Cytoplasmic dynein 1 intermediate chain 2
Q13418	ILK Integrin-linked protein kinase
Q13435	SF3B2 Splicing factor 3B subunit 2
Q13439	GOLGA4 Golgin subfamily A member 4
Q13451	FKBP5 Peptidyl-prolyl cis-trans isomerase FKBP5
Q13464	ROCK1 Rho-associated protein kinase 1
Q13492	PICALM Phosphatidylinositol-binding clathrin assembly pro
Q13509	TUBB3 Tubulin beta-3 chain
Q13547	HDAC1 Histone deacetylase 1
Q13557	CAMK2D Calcium/calmodulin-dependent protein kinase type I
Q13561	DCTN2 Dynactin subunit 2
Q13573	SNW1 SNW domain-containing protein 1
Q13596	SNX1 Sorting nexin-1
Q13630	TSTA3 GDP-L-fucose synthase
Q13642	FHL1 Four and a half LIM domains protein 1
Q13740	ALCAM CD166 antigen
Q13765	NACA Nascent polypeptide-associated complex subunit alp
Q13813	SPTAN1 Spectrin alpha chain, non-erythrocytic 1
Q13838	DDX39B Spliceosome RNA helicase DDX39B
Q13868	EXOSC2 Exosome complex component RRP4
Q13907	IDI1 Isopentenyl-diphosphate Delta-isomerase 1
Q14008	CKAP5 Cytoskeleton-associated protein 5
Q14019	COTL1 Coactosin-like protein
Q14103	HNRNPD Heterogeneous nuclear ribonucleoprotein D0
Q14116	IL18 Interleukin-18
Q14141	SEPT6 Septin-6
Q14151	SAFB2 Scaffold attachment factor B2
Q14155	ARHGEF7 Rho guanine nucleotide exchange factor 7
Q14157	UBAP2L Ubiquitin-associated protein 2-like
Q14192	FHL2 Four and a half LIM domains protein 2
Q14203	DCTN1 Dynactin subunit 1
Q14247	CTTN Src substrate cortactin
Q14315	FLNC Filamin-C
Q14320	FAM50A Protein FAM50A
Q14554	PDIA5 Protein disulfide-isomerase A5
Q14651	PLS1 Plastin-1
Q14677	CLINT1 Clathrin interactor 1
Q14683	SMC1A Structural maintenance of chromosomes protein 1A
Q14696	MESDC2 LDLR chaperone MESD
Q14847	LASP1 LIM and SH3 domain protein 1
Q14914	PTGR1 Prostaglandin reductase 1
Q14980	NUMA1 Nuclear mitotic apparatus protein 1
Q15031	LARS2 Probable leucine--tRNA ligase, mitochondrial
Q15046	KARS Lysine--tRNA ligase
Q15054	POLD3 DNA polymerase delta subunit 3
Q15056	EIF4H Eukaryotic translation initiation factor 4H
Q15075	EEA1 Early endosome antigen 1
Q15084	PDIA6 Protein disulfide-isomerase A6
Q15149	PLEC Plectin
Q15181	PPA1 Inorganic pyrophosphatase
Q15185	PTGES3 Prostaglandin E synthase 3
Q15233	NONO Non-POU domain-containing octamer-binding protein
Q15365	PCBP1 Poly(rC)-binding protein 1
Q15366	PCBP2 Poly(rC)-binding protein 2
Q15404	RSU1 Ras suppressor protein 1
Q15417	CNN3 Calponin-3
Q15424	SAFB Scaffold attachment factor B1
Q15459	SF3A1 Splicing factor 3A subunit 1
Q15631	TSN Translin
Q15637	SF1 Splicing factor 1
Q15691	MAPRE1 Microtubule-associated protein RP/EB family member
Q15717	ELAVL1 ELAV-like protein 1
Q15738	NSDHL Sterol-4-alpha-carboxylate 3-dehydrogenase, decarb
Q15785	TOMM34 Mitochondrial import receptor subunit TOM34
Q15796	SMAD2 Mothers against decapentaplegic homolog 2
Q16186	ADRM1 Proteasomal ubiquitin receptor ADRM1
Q16204	CCDC6 Coiled-coil domain-containing protein 6
Q16543	CDC37 Hsp90 co-chaperone Cdc37
Q16576	RBBP7 Histone-binding protein RBBP7
Q16658	FSCN1 Fascin
Q16698	DECR1 2,4-dienoyl-CoA reductase, mitochondrial
Q16822	PCK2 Phosphoenolpyruvate carboxykinase
Q16836	HADH Hydroxyacyl-coenzyme A dehydrogenase, mitochondria
Q16851	UGP2 UTP--glucose-1-phosphate uridylyltransferase
Q16891	IMMT Mitochondrial inner membrane protein
Q1KMD3	HNRNPUL2 Heterogeneous nuclear ribonucleoprotein U-like pro
Q2NL82	TSR1 Pre-rRNA-processing protein TSR1 homolog
Q2TAY7	SMU1 WD40 repeat-containing protein SMU1
Q32P28	LEPRE1 Prolyl 3-hydroxylase 1
Q4V328	GRIPAP1 GRIP1-associated protein 1
Q53FA3	HSPA1L Heat shock 70kDa protein 1-like variant
Q562R1	ACTBL2 Beta-actin-like protein 2
Q567U6	CCDC93 Coiled-coil domain-containing protein 93
Q5F1R6	DNAJC21 DnaJ homolog subfamily C member 21
Q5JPE7	NOMO2 Nodal modulator 2
Q5JRX3	PITRM1 Presequence protease, mitochondrial
Q5JTV8	TOR1AIP1 Torsin-1A-interacting protein 1
Q5SSJ5	HP1BP3 Heterochromatin protein 1-binding protein 3
Q5T8P6	RBM26 RNA-binding protein 26
Q5T9A4	ATAD3B ATPase family AAA domain-containing protein 3B
Q68EM7	ARHGAP17 Rho GTPase-activating protein 17
Q6FI81	CIAPIN1 Anamorsin
Q6IBS0	TWF2 Twinfilin-2
Q6IS14	EIF5AL1 Eukaryotic translation initiation factor 5A-1-like
Q6NZI2	PTRF Polymerase I and transcript release factor
Q6PI48	DARS2 Aspartate--tRNA ligase, mitochondrial
Q6UB35	MTHFD1L Monofunctional C1-tetrahydrofolate synthase, mitoc
Q6UXN9	WDR82 WD repeat-containing protein 82
Q6YN16	HSDL2 Hydroxysteroid dehydrogenase-like protein 2
Q6ZXV5	TMTC3 Transmembrane and TPR repeat-containing protein 3
Q71U36	TUBA1A Tubulin alpha-1A chain
Q7KZF4	SND1 Staphylococcal nuclease domain-containing protein
Q7L014	DDX46 Probable ATP-dependent RNA helicase DDX46
Q7L0Y3	TRMT10C Mitochondrial ribonuclease P protein 1
Q7L1Q6	BZW1 Basic leucine zipper and W2 domain-containing prot
Q7RTV0	PHF5A PHD finger-like domain-containing protein 5A
Q7Z417	NUFIP2 Nuclear fragile X mental retardation-interacting p
Q7Z4S6	KIF21A Kinesin-like protein KIF21A
Q86TU7	SETD3 Histone-lysine N-methyltransferase setd3
Q86UE4	MTDH Protein LYRIC
Q86UP2	KTN1 Kinectin
Q86V81	ALYREF THO complex subunit 4
Q86VS8	HOOK3 Protein Hook homolog 3
Q86YP4	GATAD2A Transcriptional repressor p66-alpha
Q8IU85	CAMK1D Calcium/calmodulin-dependent protein kinase type 1
Q8IUD2	ERC1 ELKS/Rab6-interacting/CAST family member 1
Q8IVF2	AHNAK2 Protein AHNAK2
Q8IWJ2	GCC2 GRIP and coiled-coil domain-containing protein 2
Q8IWS0	PHF6 PHD finger protein 6
Q8IX12	CCAR1 Cell division cycle and apoptosis regulator protei
Q8N1G4	LRRC47 Leucine-rich repeat-containing protein 47
Q8N684	CPSF7 Cleavage and polyadenylation specificity factor su
Q8NBJ7	SUMF2 Sulfatase-modifying factor 2
Q8NBS9	TXNDC5 Thioredoxin domain-containing protein 5
Q8NE71	ABCF1 ATP-binding cassette sub-family F member 1
Q8TCS8	PNPT1 Polyribonucleotide nucleotidyltransferase 1, mitoc
Q8WU90	ZC3H15 Zinc finger CCCH domain-containing protein 15
Q8WUM4	PDCD6IP Programmed cell death 6-interacting protein
Q8WVM8	SCFD1 Sec1 family domain-containing protein 1
Q8WX93	PALLD Palladin
Q8WXF1	PSPC1 Paraspeckle component 1
Q8WXI9	GATAD2B Transcriptional repressor p66-beta
Q92499	DDX1 ATP-dependent RNA helicase DDX1
Q92598	HSPH1 Heat shock protein 105 kDa
Q92599	SEPT8 Septin-8
Q92688	ANP32B Acidic leucine-rich nuclear phosphoprotein 32 fami
Q92734	TFG Protein TFG
Q92747	ARPC1A Actin-related protein 2/3 complex subunit 1A
Q92769	HDAC2 Histone deacetylase 2
Q92804	TAF15 TATA-binding protein-associated factor 2N
Q92841	DDX17 Probable ATP-dependent RNA helicase DDX17
Q92878	RAD50 DNA repair protein RAD50
Q92890	UFD1L Ubiquitin fusion degradation protein 1 homolog
Q92900	UPF1 Regulator of nonsense transcripts 1
Q92905	COPS5 COP9 signalosome complex subunit 5
Q92945	KHSRP Far upstream element-binding protein 2
Q93009	USP7 Ubiquitin carboxyl-terminal hydrolase 7
Q969G3	SMARCE1 SWI/SNF-related matrix-associated actin-dependent
Q969H8	C19orf10 UPF0556 protein C19orf10
Q969S3	ZNF622 Zinc finger protein 622
Q96A33	CCDC47 Coiled-coil domain-containing protein 47
Q96A72	MAGOHB Protein mago nashi homolog 2
Q96AE4	FUBP1 Far upstream element-binding protein 1
Q96AG4	LRRC59 Leucine-rich repeat-containing protein 59
Q96AY3	FKBP10 Peptidyl-prolyl cis-trans isomerase FKBP10
Q96BN8	FAM105B Protein FAM105B
Q96CW1	AP2M1 AP-2 complex subunit mu
Q96CX2	KCTD12 BTB/POZ domain-containing protein KCTD12
Q96DB5	FAM82B Regulator of microtubule dynamics protein 1
Q96DG6	CMBL Carboxymethylenebutenolidase homolog
Q96DI7	SNRNP40 U5 small nuclear ribonucleoprotein 40 kDa protein
Q96E11	MRRF Ribosome-recycling factor, mitochondrial
Q96EK6	GNPNAT1 Glucosamine 6-phosphate N-acetyltransferase
Q96EY1	DNAJA3 DnaJ homolog subfamily A member 3, mitochondrial
Q96FW1	OTUB1 Ubiquitin thioesterase OTUB1
Q96G03	PGM2 Phosphoglucomutase-2
Q96GG9	DCUN1D1 DCN1-like protein 1
Q96GQ7	DDX27 Probable ATP-dependent RNA helicase DDX27
Q96I99	SUCLG2 Succinyl-CoA ligase
Q96KP4	CNDP2 Cytosolic non-specific dipeptidase
Q96P16	RPRD1A Regulation of nuclear pre-mRNA domain-containing p
Q96PK6	RBM14 RNA-binding protein 14
Q96PZ0	PUS7 Pseudouridylate synthase 7 homolog
Q96QC0	PPP1R10 Serine/threonine-protein phosphatase 1 regulatory
Q96RP9	GFM1 Elongation factor G, mitochondrial
Q96SI9	STRBP Spermatid perinuclear RNA-binding protein
Q96T51	RUFY1 RUN and FYVE domain-containing protein 1
Q96TA1	FAM129B Niban-like protein 1
Q99439	CNN2 Calponin-2
Q99471	PFDN5 Prefoldin subunit 5
Q99497	PARK7 Protein DJ-1
Q99543	DNAJC2 DnaJ homolog subfamily C member 2
Q99567	NUP88 Nuclear pore complex protein Nup88
Q99598	TSNAX Translin-associated protein X
Q99615	DNAJC7 DnaJ homolog subfamily C member 7
Q99623	PHB2 Prohibitin-2
Q99714	HSD17B10 3-hydroxyacyl-CoA dehydrogenase type-2
Q99729	HNRNPAB Heterogeneous nuclear ribonucleoprotein A/B
Q99733	NAP1L4 Nucleosome assembly protein 1-like 4
Q99798	ACO2 Aconitate hydratase, mitochondrial
Q99829	CPNE1 Copine-1
Q99832	CCT7 T-complex protein 1 subunit eta
Q99848	EBNA1BP2 Probable rRNA-processing protein EBP2
Q99961	SH3GL1 Endophilin-A2
Q9BPW8	NIPSNAP1 Protein NipSnap homolog 1
Q9BQ39	DDX50 ATP-dependent RNA helicase DDX50
Q9BQ69	MACROD1 O-acetyl-ADP-ribose deacetylase MACROD1
Q9BRX2	PELO Protein pelota homolog
Q9BT78	COPS4 COP9 signalosome complex subunit 4
Q9BTE6	AARSD1 Alanyl-tRNA editing protein Aarsd1
Q9BUF5	TUBB6 Tubulin beta-6 chain
Q9BUJ2	HNRNPUL1 Heterogeneous nuclear ribonucleoprotein U-like pro
Q9BVA1	TUBB2B Tubulin beta-2B chain
Q9BVP2	GNL3 Guanine nucleotide-binding protein-like 3
Q9BWD1	ACAT2 Acetyl-CoA acetyltransferase, cytosolic
Q9BXP5	SRRT Serrate RNA effector molecule homolog
Q9BXW7	CECR5 Cat eye syndrome critical region protein 5
Q9BY44	EIF2A Eukaryotic translation initiation factor 2A
Q9BY77	POLDIP3 Polymerase delta-interacting protein 3
Q9BYD6	MRPL1 39S ribosomal protein L1, mitochondrial
Q9BYT8	NLN Neurolysin, mitochondrial
Q9BYX2	TBC1D2 TBC1 domain family member 2A
Q9BZD4	NUF2 Kinetochore protein Nuf2
Q9BZI7	UPF3B Regulator of nonsense transcripts 3B
Q9BZK7	TBL1XR1 F-box-like/WD repeat-containing protein TBL1XR1
Q9GZT8	NIF3L1 NIF3-like protein 1
Q9GZV4	EIF5A2 Eukaryotic translation initiation factor 5A-2
Q9GZZ1	NAA50 N-alpha-acetyltransferase 50
Q9H0B6	KLC2 Kinesin light chain 2
Q9H223	EHD4 EH domain-containing protein 4
Q9H2G2	SLK STE20-like serine/threonine-protein kinase
Q9H2U2	PPA2 Inorganic pyrophosphatase 2, mitochondrial
Q9H307	PNN Pinin
Q9H3S7	PTPN23 Tyrosine-protein phosphatase non-receptor type 23
Q9H444	CHMP4B Charged multivesicular body protein 4b
Q9H488	POFUT1 GDP-fucose protein O-fucosyltransferase 1
Q9H4A3	WNK1 Serine/threonine-protein kinase WNK1
Q9H4B7	TUBB1 Tubulin beta-1 chain
Q9H4M9	EHD1 EH domain-containing protein 1
Q9H6T3	RPAP3 RNA polymerase II-associated protein 3
Q9H7Z7	PTGES2 Prostaglandin E synthase 2
Q9H9A6	LRRC40 Leucine-rich repeat-containing protein 40
Q9HB71	CACYBP Calcyclin-binding protein
Q9HC38	GLOD4 Glyoxalase domain-containing protein 4
Q9NP79	VTA1 Vacuolar protein sorting-associated protein VTA1 h
Q9NQ88	TIGAR Fructose-2,6-bisphosphatase TIGAR
Q9NQR4	NIT2 Omega-amidase NIT2
Q9NR30	DDX21 Nucleolar RNA helicase 2
Q9NR45	NANS Sialic acid synthase
Q9NR46	SH3GLB2 Endophilin-B2
Q9NSD9	FARSB Phenylalanine--tRNA ligase beta subunit
Q9NSE4	IARS2 Isoleucine--tRNA ligase, mitochondrial
Q9NSK0	KLC4 Kinesin light chain 4
Q9NTJ3	SMC4 Structural maintenance of chromosomes protein 4
Q9NTK5	OLA1 Obg-like ATPase 1
Q9NTX5	ECHDC1 Ethylmalonyl-CoA decarboxylase
Q9NUJ1	ABHD10 Abhydrolase domain-containing protein 10, mitochon
Q9NUQ3	TXLNG Gamma-taxilin
Q9NUU7	DDX19A ATP-dependent RNA helicase DDX19A
Q9NV70	EXOC1 Exocyst complex component 1
Q9NVA2	SEPT11 Septin-11
Q9NVI7	ATAD3A ATPase family AAA domain-containing protein 3A
Q9NX58	LYAR Cell growth-regulating nucleolar protein
Q9NX63	CHCHD3 Coiled-coil-helix-coiled-coil-helix domain-contain
Q9NXG2	THUMPD1 THUMP domain-containing protein 1
Q9NXV6	CDKN2AIP CDKN2A-interacting protein
Q9NZI8	IGF2BP1 Insulin-like growth factor 2 mRNA-binding protein
Q9P0K7	RAI14 Ankycorbin
Q9P0L0	VAPA Vesicle-associated membrane protein-associated pro
Q9P0V9	SEPT10 Septin-10
Q9P258	RCC2 Protein RCC2
Q9P289	MST4 Serine/threonine-protein kinase MST4
Q9P2E9	RRBP1 Ribosome-binding protein 1
Q9P2R7	SUCLA2 Succinyl-CoA ligase
Q9UBE0	SAE1 SUMO-activating enzyme subunit 1
Q9UBQ0	VPS29 Vacuolar protein sorting-associated protein 29
Q9UBQ7	GRHPR Glyoxylate reductase/hydroxypyruvate reductase
Q9UBT2	UBA2 SUMO-activating enzyme subunit 2
Q9UBU9	NXF1 Nuclear RNA export factor 1
Q9UBW8	COPS7A COP9 signalosome complex subunit 7a
Q9UDY4	DNAJB4 DnaJ homolog subfamily B member 4
Q9UG63	ABCF2 ATP-binding cassette sub-family F member 2
Q9UH62	ARMCX3 Armadillo repeat-containing X-linked protein 3
Q9UI10	EIF2B4 Translation initiation factor eIF-2B subunit delta
Q9UIJ7	AK3 GTP:AMP phosphotransferase, mitochondrial
Q9UJS0	SLC25A13 Calcium-binding mitochondrial carrier protein Aral
Q9UJU6	DBNL Drebrin-like protein
Q9UJX3	ANAPC7 Anaphase-promoting complex subunit 7
Q9UJZ1	STOML2 Stomatin-like protein 2
Q9UKD2	MRTO4 mRNA turnover protein 4 homolog
Q9UKK9	NUDT5 ADP-sugar pyrophosphatase
Q9UKM9	RALY RNA-binding protein Raly
Q9UKS6	PACSIN3 Protein kinase C and casein kinase substrate in ne
Q9UKX7	NUP50 Nuclear pore complex protein Nup50
Q9UL46	PSME2 Proteasome activator complex subunit 2
Q9UMS4	PRPF19 Pre-mRNA-processing factor 19
Q9UN86	G3BP2 Ras GTPase-activating protein-binding protein 2
Q9UNF0	PACSIN2 Protein kinase C and casein kinase substrate in ne
Q9UNH7	SNX6 Sorting nexin-6
Q9UNP9	PPIE Peptidyl-prolyl cis-trans isomerase E
Q9UQ80	PA2G4 Proliferation-associated protein 2G4
Q9UQE7	SMC3 Structural maintenance of chromosomes protein 3
Q9Y230	RUVBL2 RuvB-like 2
Q9Y265	RUVBL1 RuvB-like 1
Q9Y266	NUDC Nuclear migration protein nudC
Q9Y281	CFL2 Cofilin-2
Q9Y285	FARSA Phenylalanine--tRNA ligase alpha subunit
Q9Y2B0	CNPY2 Protein canopy homolog 2
Q9Y2Q3	GSTK1 Glutathione S-transferase kappa 1
Q9Y2W1	THRAP3 Thyroid hormone receptor-associated protein 3
Q9Y2W2	WBP11 WW domain-binding protein 11
Q9Y2X3	NOP58 Nucleolar protein 58
Q9Y2Z0	SUGT1 Suppressor of G2 allele of SKP1 homolog
Q9Y2Z4	YARS2 Tyrosine--tRNA ligase, mitochondrial
Q9Y305	ACOT9 Acyl-coenzyme A thioesterase 9, mitochondrial
Q9Y3A5	SBDS Ribosome maturation protein SBDS
Q9Y3F4	STRAP Serine-threonine kinase receptor-associated protei
Q9Y3I0	C22orf28 tRNA-splicing ligase RtcB homolog
Q9Y3U8	RPL36 60S ribosomal protein L36
Q9Y3Z3	SAMHD1 SAM domain and HD domain-containing protein 1
Q9Y450	HBS1L HBS1-like protein
Q9Y490	TLN1 Talin-1
Q9Y4E8	USP15 Ubiquitin carboxyl-terminal hydrolase 15
Q9Y4G6	TLN2 Talin-2
Q9Y4L1	HYOU1 Hypoxia up-regulated protein 1
Q9Y5K5	UCHL5 Ubiquitin carboxyl-terminal hydrolase isozyme L5
Q9Y606	PUS1 tRNA pseudouridine synthase A, mitochondrial
Q9Y608	LRRFIP2 Leucine-rich repeat flightless-interacting protein
Q9Y617	PSAT1 Phosphoserine aminotransferase
Q9Y696	CLIC4 Chloride intracellular channel protein 4
Q9Y6D9	MAD1L1 Mitotic spindle assembly checkpoint protein MAD1
Q9Y6E0	STK24 Serine/threonine-protein kinase 24
Q9Y6E2	BZW2 Basic leucine zipper and W2 domain-containing prot

## Sheet: Sheet3
Bioinformatic analysis of proteins with N-homocysteinylation
Category	Term	Count	%	PValue	Genes	List Total	Pop Hits	Pop Total	Fold Enrichment	Bonferroni	Benjamini	FDR
GOTERM_BP_DIRECT	GO:0098609~cell-cell adhesion	97	11.0102	3.55134e-55	P07355, O00151, P62820, P42224, Q7L1Q6, Q9NR46, P62750, Q9Y6E0, P06733, P31947, P29692, Q8WU90, Q9H444, Q9Y6E2, P31946, Q9H4M9, P07737, P11142, P62424, P42166, P62826, Q9UNF0, Q9Y265, P61978, Q9Y266, Q99497, Q06830, Q9UJU6, P42167, P15880, Q14677, Q9H2G2, P55010, O75369, Q8IUD2, Q13813, O60749, Q99961, Q15149, Q15417, P08238, Q05682, P62258, P47756, Q9BY44, Q02878, P63244, Q14847, Q15365, Q99439,…	863	271	16792	6.96457	1.04587e-51	1.04587e-51	6.38162e-52
GOTERM_BP_DIRECT	GO:0006413~translational initiation	53	6.01589	6.33338e-32	P61513, P62750, P62753, P32969, P62899, P62424, P62269, P61247, O00303, P62263, P23396, P62851, P15880, O14602, P39019, O75821, P62913, P55010, P60842, P20042, P11940, Q9BY44, O15372, P61254, O60841, P62917, Q02878, P35268, Q92905, P63173, P30050, P23588, P62249, Q15056, P62241, P46782, P60866, Q8NE71, P46783, P42766, P05388, P62081, P83731, P25398, Q9UI10, P55884, P06730, P62888, P50914, P05198,…	863	137	16792	7.52743	1.86518e-28	9.32589e-29	1.13808e-28
GOTERM_BP_DIRECT	GO:0006457~protein folding	54	6.1294	2.68276e-26	P31689, Q96EY1, Q9Y230, P30405, Q32P28, P61604, P11142, P50502, Q9Y266, Q16543, P49588, P17987, P49257, Q8NBS9, Q99471, P30533, P38646, Q08752, Q9UNP9, P14314, P08238, P10599, Q5F1R6, O00170, P40227, Q02790, Q14696, Q9UDY4, O95302, P25685, Q13451, P68400, Q99832, P13667, P07900, O95757, P14625, O95816, P48643, O76031, P50990, P50991, P26885, P30101, Q14554, P30040, Q12931, Q15084, P62937, P49368,…	863	180	16792	5.83731	7.90074e-23	2.63358e-23	4.82082e-23
GOTERM_BP_DIRECT	GO:0000398~mRNA splicing, via spliceosome	59	6.69694	1.07428e-25	P52597, Q12874, Q13573, P31943, P14678, Q15233, Q15717, P11142, Q9BZI7, Q8N684, Q9H307, O00148, O43390, P61978, Q00839, P09651, Q9BUJ2, O60506, P08579, O94906, P22626, P17844, Q9UNP9, P11940, Q96DI7, P62316, P35637, Q9UKM9, P67809, P62318, Q15366, Q8IX12, Q15459, Q15365, P09661, P38159, O75937, Q7L014, P35269, Q9UMS4, Q86V81, P09012, P38919, Q15637, O43395, P52272, P26368, P51991, P63162, Q8WXF1,…	863	222	16792	5.17119	3.16376e-22	7.90939e-23	1.93044e-22
GOTERM_BP_DIRECT	GO:0000184~nuclear-transcribed mRNA catabolic process, nonsense-mediated decay	43	4.88082	1.48779e-24	P63151, P61513, P62750, P35268, P30153, P62753, P63173, P30050, P32969, P62249, P62899, P62424, P62269, Q9BZI7, P61247, P62241, P15170, P38919, P62263, Q92900, P23396, P46782, P62851, P60866, P15880, P46783, P42766, P39019, P05388, P62495, P83731, P62081, P62913, P25398, P11940, P62888, P61254, P62917, Q02878, P50914, Q96A72, Q9Y3U8, P62847	863	119	16792	7.03094	4.38153e-21	8.76306e-22	2.6735e-21
GOTERM_BP_DIRECT	GO:0006614~SRP-dependent cotranslational protein targeting to membrane	37	4.19977	1.2249e-22	P61513, P62750, P35268, P62753, P63173, P30050, P32969, P62249, P62899, P62424, P62269, P61247, P62241, P62263, P23396, P46782, P62851, P60866, P15880, P46783, P61011, P42766, P39019, P05388, P83731, P62081, P62913, P25398, O76094, P62888, P61254, P62917, P37108, Q02878, P50914, Q9Y3U8, P62847	863	94	16792	7.65888	3.60732e-19	6.0122e-20	2.20109e-19
GOTERM_BP_DIRECT	GO:0019083~viral transcription	37	4.19977	1.11207e-19	P61513, P62750, P35268, P62753, P32969, P30050, P63173, P12270, P62249, P62899, P62424, P62269, P61247, P62241, P62263, P23396, P46782, P62851, P60866, P15880, P46783, P42766, Q99567, P39019, P05388, P83731, P62081, P62913, P25398, P62888, Q9UKX7, P61254, P62917, Q02878, P50914, Q9Y3U8, P62847	863	112	16792	6.42799	3.27504e-16	4.67862e-17	1.99834e-16
GOTERM_BP_DIRECT	GO:0006412~translation	55	6.24291	1.30299e-19	Q13765, P61513, P62750, P62753, P32969, P62899, P62424, P62269, P61247, P62263, P23396, P62851, P15880, Q13310, P39019, P62913, P49590, Q9P2E9, P61254, P62917, Q9NSD9, Q02878, Q9Y450, P82933, P49591, Q9BRX2, P14868, P35268, Q92905, P30050, P63173, P62249, Q9BYD6, O75746, P62241, O00425, P46782, Q9UJS0, P60866, P46783, Q8NE71, Q9Y2Z4, P42766, P05388, P19525, P62081, P83731, P25398, P62888, P12081,…	863	253	16792	4.22994	3.8373e-16	4.79662e-17	2.34142e-16
GOTERM_BP_DIRECT	GO:0043488~regulation of mRNA stability	33	3.74574	3.7087e-17	P35998, P43686, P25788, O43242, P25789, Q13868, P39687, P31946, P62195, Q15717, P20618, P11142, P61289, P08107, P17980, Q92945, P28066, P63104, P27695, Q9UL46, Q01105, Q06323, P11940, P28070, O14818, P51665, P62333, P60900, Q14103, P49721, P49720, P62191, O00232	863	103	16792	6.23402	1.09221e-13	1.21357e-14	6.6644e-14
GOTERM_BP_DIRECT	GO:0006364~rRNA processing	46	5.22134	3.75383e-16	P61513, Q13868, P62750, P35268, Q9Y2W2, P62753, P63173, P30050, Q2NL82, P32969, P62249, P62899, P62424, P62269, P61247, Q9UQ80, P62241, Q9Y3A5, P38919, P62263, P23396, P46782, P62851, P60866, P15880, Q99848, P46783, Q9NR30, P42766, P39019, P05388, Q9Y2X3, P83731, P62081, P62913, P25398, Q9UKD2, O43818, P62888, P61254, P62917, Q02878, P50914, Q96GQ7, Q9Y3U8, P62847	863	214	16792	4.1825	9.80882e-13	9.81437e-14	5.9952e-13
